# Supplementary material
Source: publisher figshare collection journal article supplement (https://acs.figshare.com/ndownloader/files/25048076)
Supplement: Supplementary file 1 [file 25048076]

# Construction of $\beta$ -Quaternary $\alpha,\alpha$ -Difluoroketones via Catalytic Nucleophilic Substitution of Tertiary Alcohols with Difluoroenoxysilanes

Yong-Jia Hao,<sup>†,‡</sup> Yi Gong,<sup>‡,‡</sup> Ying Zhou,<sup>\*,†</sup> Jian Zhou,<sup>‡,§</sup> and Jin-Sheng Yu<sup>\*,‡</sup>

<sup>†</sup> College of Pharmacy, Guizhou University of Traditional Chinese Medicine, Guiyang 550025 China.

<sup>‡</sup> Shanghai Engineering Research Center of Molecular Therapeutics and New Drug Development, Shanghai Key Laboratory of Green Chemistry and Chemical Processes, School of Chemistry and Molecular Engineering, East China Normal University, Shanghai 200062, China.

<sup>§</sup> State Key Laboratory of Organometallic Chemistry, Shanghai Institute of Organic Chemistry, CAS, Shanghai 200032 China.

<sup>#</sup> These authors contributed equally to this work.

E-mail for Y. Zhou: zhouying067@gzy.edu.cn; E-mail for J.-S. Yu: jsyu@chem.ecnu.edu.cn

## Supporting information

| Table of Contents                                                                   | Page     |
|-------------------------------------------------------------------------------------|----------|
| 1. General information                                                              | S2       |
| 2. General procedure for the substitution reaction                                  | S3-S13   |
| 3. Transformation of products                                                       | S14-S17  |
| 4. Control experiment and a proposed reaction pathway                               | S18      |
| 5. X-ray crystallographic data of compound <b>6</b>                                 | S19-S23  |
| 6. <sup>1</sup> H, <sup>13</sup> C and <sup>19</sup> F NMR spectra and HPLC spectra | S24-S114 |

## 1. General information

Reactions were monitored by thin layer chromatography (TLC) using UV light to visualize the progress of reaction. Purification of reaction products was carried out by flash chromatography on 300–400 mesh silica gel. Chemical yields referred to pure isolated substances.  $^1\text{H}$ ,  $^{13}\text{C}$ , and  $^{19}\text{F}$  NMR spectra were recorded on a Bruker DPX-400 or DPX-500 spectrometer. The HRMS spectra were measured on Waters Synapt TOF G2-S mass spectrometer or Bruker maXis impact spectrometer using electron spray ionization (ESI) method. Chemical shifts ( $\delta$ ) are expressed in parts per million (ppm) units using  $(\text{CH}_3)_4\text{Si}$  as the internal standard. HPLC analysis was performed on a Shimadzu LC-20AD instrument using Daicel Chiral columns at 30 °C and a mixture of HPLC-grade hexanes and isopropanol as eluent. The following abbreviations were used to designate chemical shift multiplicities: s = singlet, d = doublet, t = triplet, q = quartet, m = multiplet, dd = doublet of doublets, td = triplet of doublets, dt = doublet of triplets. Coupling constants ( $J$ ) are reported in Hertz.

Unless mentioned, all reactions were carried out under an atmosphere of  $\text{N}_2$ . Anhydrous  $\text{CH}_2\text{Cl}_2$ , DCE, and  $\text{CH}_3\text{CN}$  were prepared by first distillation over  $\text{P}_2\text{O}_5$  and then from  $\text{CaH}_2$ . Anhydrous toluene and THF were prepared by distillation over sodium-benzophenone ketyl prior to use. The 3-substituted 3-hydroxyoxindoles **2** were prepared from the corresponding isatins and Grignard reagents according to the reported procedure.<sup>1</sup> Difluoroenoxysilanes<sup>2a,b</sup> and monofluorinated silyl enol ethers<sup>2c</sup> were prepared by using the literature methods.

### List of abbreviation:

| Entry | Chemical name               | Abbreviation             |
|-------|-----------------------------|--------------------------|
| 1     | Dichloromethane             | $\text{CH}_2\text{Cl}_2$ |
| 2     | 1,2-Dichloroethane          | DCE                      |
| 3     | Tetrahydrofuran             | THF                      |
| 4     | Petroleum ether             | PE                       |
| 5     | Ethyl acetate               | EtOAc                    |
| 6     | Hexafluoroisopropyl alcohol | HFIP                     |

1 (a) Hamashima, Y.; Suzuki, T.; Takano, H.; Shimura, Y.; Sodeoka, M. *J. Am. Chem. Soc.* **2005**, *127*, 10164; (b) Wu, H.-X.; Xue, F.; Xiao, X.; Qin, Y. *J. Am. Chem. Soc.* **2010**, *132*, 14052.

2 (a) Amii, H.; Kobayashi, T.; Hatamoto, Y.; Uneyama, K. *Chem. Commun.* **1999**, 1323; (b) Prakash, G. K. S.; Hu, J.; Olah, G. A. *J. Fluorine Chem.* **2001**, *112*, 357; (c) Bélanger, É.; Cantin, K.; Messe, O.; Tremblay, M.; Paquin, J. F. *J. Am. Chem. Soc.* **2007**, *129*, 1034.

## 2. General procedure for the substitution reaction

### 2.1 The reaction of 3-hydroxyoxindoles **2** with fluorinated enol silyl ethers **1**

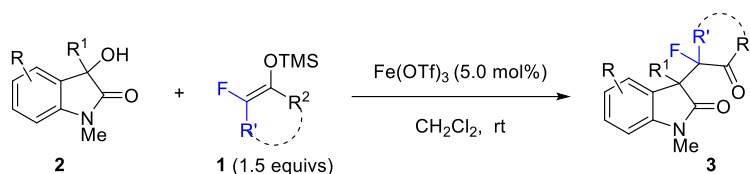

Under an atmosphere of  $\text{N}_2$ , to a 25 mL flame-dried Schleck tube were added 3-hydroxyoxindoles **2** (0.25 mmol, 1.0 equiv) and  $\text{Fe}(\text{OTf})_3$  (0.0125 mmol, 6.3 mg, 5.0 mol%), followed by the addition of anhydrous  $\text{CH}_2\text{Cl}_2$  (2.5 mL). After being stirred at room temperature for about 5 min, fluorinated enol silyl ethers **1** (0.375 mmol, 1.5 equivs) was then added. The resulting mixture was stirred at room temperature until full conversion of **2** by TLC analysis. The reaction mixture was then concentrated under reduced pressure to give the residue, which was purified by silica gel column chromatography to afford the products **3**, using PE/EtOAc as eluent.

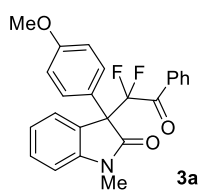

Column chromatography with PE/EtOAc (10/1, v/v) afforded product **3a** in 91%

yield (92.6 mg) as white solid, m.p. 148-150 °C.  $^1\text{H}$  NMR (400 MHz,  $\text{CDCl}_3$ ):  $\delta$

7.93 (d,  $J = 7.4$  Hz, 2H), 7.78 (dd,  $J = 8.9, 1.1$  Hz, 2H), 7.59-7.53 (m, 2H), 7.42-

7.35 (m, 3H), 7.07 (td,  $J = 7.6$  Hz, 0.9 Hz, 1H), 6.91-6.88 (m, 3H), 3.80 (s, 3H),

3.26 (s, 3H);  $^{13}\text{C}$  NMR (100 MHz,  $\text{CDCl}_3$ ):  $\delta$  187.6 (t,  $J = 31.7$  Hz, 1C), 173.4 (d,  $J = 10.6$  Hz, 1C), 159.7, 144.4, 134.4, 131.8 (t,  $J = 3.3$  Hz, 1C), 130.8 (d,  $J = 1.9$  Hz, 1C), 130.1 (t,  $J = 2.9$  Hz, 1C), 129.3, 128.5, 126.5 (d,  $J = 5.7$  Hz, 1C), 126.2 (d,  $J = 4.2$  Hz, 1C), 123.2, 122.1, 117.5 (dd,  $J = 268.5, 261.9$  Hz, 1C), 113.6, 108.8, 57.9 (t,  $J = 20.5$  Hz, 1C), 55.2 (d,  $J = 2.7$  Hz, 1C), 26.7;  $^{19}\text{F}$  NMR (376 MHz,  $\text{CDCl}_3$ ):  $\delta$  -97.45 (d,  $J = 310.7$  Hz, 1F), -99.35 (d,  $J = 310.6$  Hz, 1F); IR (ATR): 2976, 2885, 1720, 1510, 1253, 1082, 941, 675  $\text{cm}^{-1}$ ; HRMS (ESI-TOF)  $m/z$ :  $[\text{M}+\text{Na}]^+$  Calcd for  $\text{C}_{24}\text{H}_{19}\text{F}_2\text{NO}_3\text{Na}$  430.1231; Found 430.1201.

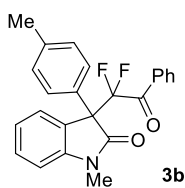

Column chromatography with PE/EtOAc (10/1, v/v) afforded product **3b** in 90%

yield (88.0 mg) as white solid (m.p. 148-150 °C).  $^1\text{H}$  NMR (400 MHz,  $\text{CDCl}_3$ ):  $\delta$

7.95 (d,  $J = 7.5$  Hz, 2H), 7.76 (d,  $J = 7.4$  Hz, 2H), 7.59-7.56 (m, 2H), 7.43-7.35 (m,

3H), 7.20 (d,  $J = 8.3$  Hz, 2H), 7.08 (td,  $J = 7.5, 0.9$  Hz, 1H), 6.91 (d,  $J = 7.8$  Hz,

1H), 3.27 (s, 3H), 2.35 (s, 3H); <sup>13</sup>C NMR (100 MHz, CDCl<sub>3</sub>): δ 187.5 (t, *J* = 31.6 Hz, 1C), 173.2 (d, *J* = 10.5 Hz, 1C), 144.3, 138.4, 134.3, 131.7 (t, *J* = 3.3 Hz, 1C), 130.1 (t, *J* = 2.8 Hz, 1C), 129.4, 129.4, 129.3, 129.0, 128.5, 126.5 (d, *J* = 5.4 Hz, 1C), 126.2 (d, *J* = 3.9 Hz, 1C), 122.1, 117.5 (dd, *J* = 268.9, 262.3 Hz, 1C), 108.8, 58.2 (t, *J* = 21.0 Hz, 1C), 26.7, 20.9 (d, *J* = 2.8 Hz, 1C); <sup>19</sup>F NMR (376 MHz, CDCl<sub>3</sub>): δ -97.26 (d, *J* = 310.8 Hz, 1F), -99.08 (d, *J* = 310.8 Hz, 1F); IR (ATR): 2976, 1710, 1263, 1072, 1049, 939, 881, 659 cm<sup>-1</sup>; HRMS (ESI-TOF) *m/z*: [M+Na]<sup>+</sup> Calcd for C<sub>24</sub>H<sub>19</sub>F<sub>2</sub>NO<sub>2</sub>Na 414.1282; Found 414.1281.

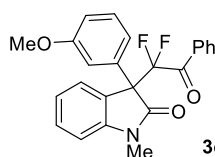

Column chromatography with PE/EtOAc (10/1, v/v) afforded product **3c** in 60% yield (61.5 mg) as white solid (m.p. 97-99 °C). <sup>1</sup>H NMR (400 MHz, CDCl<sub>3</sub>): δ

7.93 (d, *J* = 7.4 Hz, 2H), 7.59-7.53 (m, 2H), 7.47-7.46 (m, 1H), 7.42-7.35 (m, 4H), 7.28 (t, *J* = 8.0 Hz, 1H), 7.06 (td, *J* = 7.6 Hz, 0.9 Hz, 1H), 6.92-6.89 (m, 2H), 3.81 (s, 3H), 3.26 (s, 3H); <sup>13</sup>C NMR (100 MHz, CDCl<sub>3</sub>): δ 187.5 (t, *J* = 32.3 Hz, 1C), 173.0 (d, *J* = 10.6 Hz, 1C), 159.3, 144.4, 134.4, 133.1, 131.8 (t, *J* = 3.3 Hz, 1C), 130.1 (t, *J* = 2.9 Hz, 1C), 129.4, 129.1, 128.5, 126.3 (t, *J* = 4.1 Hz, 1C), 122.2, 121.9, 117.5 (dd, *J* = 267.7, 261.2 Hz, 1C), 115.8 (d, *J* = 1.8 Hz, 1C), 113.8, 108.8, 58.5 (dd, *J* = 22.6, 20.6 Hz, 1C), 55.2 (d, *J* = 4.9 Hz, 1C), 26.7; <sup>19</sup>F NMR (376 MHz, CDCl<sub>3</sub>): δ -97.21 (d, *J* = 310.0 Hz, 1F), -98.98 (d, *J* = 310.4 Hz, 1F); IR (ATR): 2976, 1714, 1695, 1492, 1259, 1047, 779, 756 cm<sup>-1</sup>; HRMS (ESI) *m/z*: [M+Na]<sup>+</sup> Calcd for C<sub>24</sub>H<sub>19</sub>F<sub>2</sub>NO<sub>3</sub>Na 430.1225; Found 430.1226.

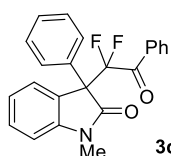

Column chromatography with PE/EtOAc (10/1, v/v) afforded product **3d** in 76% yield (71.6 mg) as white solid (m.p. 150-152 °C). <sup>1</sup>H NMR (400 MHz, CDCl<sub>3</sub>): δ

7.94 (d, *J* = 7.4 Hz, 2H), 7.88-7.86 (m, 2H), 7.59-7.56 (m, 2H), 7.43-7.36 (m, 6H), 7.08 (td, *J* = 7.6 Hz, 0.7 Hz, 1H), 6.91 (d, *J* = 7.8 Hz, 1H), 3.27 (s, 3H); <sup>13</sup>C NMR (100 MHz, CDCl<sub>3</sub>): δ 187.4 (t, *J* = 21.6 Hz, 1C), 173.1 (d, *J* = 10.6 Hz, 1C), 144.4, 134.4, 131.7 (t, *J* = 3.2 Hz, 1C), 131.6, 130.2 (t, *J* = 2.8 Hz, 1C), 129.5, 129.5, 129.4, 128.51, 128.48, 128.2, 126.4 (d, *J* = 4.3 Hz, 1C), 122.2, 117.5 (t, *J* = 269.3 Hz, 262.6 Hz, 1C), 108.8, 58.5 (t, *J* = 20.2 Hz, 1C), 26.7; <sup>19</sup>F NMR (376 MHz, CDCl<sub>3</sub>): δ -97.18 (d, *J* = 310.7 Hz, 1F), -98.94 (d, *J* = 310.7 Hz, 1F); IR (ATR): 2976, 1708, 1319, 1261, 1087, 1051, 881 cm<sup>-1</sup>; HRMS (ESI-TOF) *m/z*: [M+Na]<sup>+</sup> Calcd for C<sub>23</sub>H<sub>17</sub>F<sub>2</sub>NO<sub>2</sub>Na 400.1125; Found 400.1110.



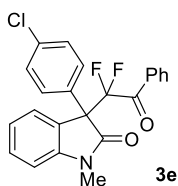

Column chromatography with PE/EtOAc (10/1, v/v) afforded product **3e** in 63% yield (64.7 mg) as white solid (m.p. 146-148 °C). <sup>1</sup>H NMR (400 MHz, CDCl<sub>3</sub>): δ 7.92 (d, *J* = 7.4 Hz, 2H), 7.80 (dd, *J* = 8.6, 1.1 Hz, 2H), 7.60-7.56 (m, 1H), 7.52 (dd, *J* = 7.2, 2.0 Hz, 1H), 7.43-7.33 (m, 5H), 7.09 (td, *J* = 7.6 Hz, 0.8 Hz, 1H), 6.92 (d, *J* = 7.8 Hz, 1H), 3.27 (s, 3H); <sup>13</sup>C NMR (100 MHz, CDCl<sub>3</sub>): δ 187.2 (t, *J* = 31.5 Hz, 1C), 172.8 (d, *J* = 10.2 Hz, 1C), 144.4, 134.9, 134.5, 131.6 (t, *J* = 3.3 Hz, 1C), 130.9 (d, *J* = 2.0 Hz, 1C), 130.1 (t, *J* = 2.9 Hz, 1C), 129.7, 128.5, 128.4, 126.3 (d, *J* = 4.1 Hz, 1C), 125.9 (td, *J* = 5.6 Hz, 1C), 122.4, 117.4 (dd, *J* = 269.4, 263.2 Hz, 1C), 109.0, 58.1 (t, *J* = 22.4 Hz, 1C), 26.8; <sup>19</sup>F NMR (376 MHz, CDCl<sub>3</sub>): δ -97.24 (d, *J* = 310.6 Hz, 1F), -98.97 (d, *J* = 310.6 Hz, 1F); IR (ATR): 2976, 1701, 1608, 1259, 1101, 1053, 881 cm<sup>-1</sup>; HRMS (ESI-TOF) *m/z*: [M+Na]<sup>+</sup> Calcd for C<sub>23</sub>H<sub>17</sub><sup>35</sup>ClF<sub>2</sub>NO<sub>2</sub> 412.0916; Found 412.0917.

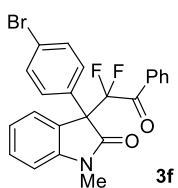

Column chromatography with PE/EtOAc (10/1, v/v) afforded product **3f** in 54% yield (61.6 mg) as white solid (m.p. 141-143 °C). <sup>1</sup>H NMR (400 MHz, CDCl<sub>3</sub>): δ 7.93-7.90 (m, 2H), 7.73 (dd, *J* = 8.7 Hz, 1.2, 2H), 7.58-7.56 (m, 1H), 7.51-7.48 (m, 3H), 7.43-7.38 (m, 3H), 7.08 (td, *J* = 7.6 Hz, 1.0 Hz, 1H), 6.92 (d, *J* = 7.8 Hz, 1H), 3.26 (s, 3H); <sup>13</sup>C NMR (125 MHz, CDCl<sub>3</sub>): δ 182.2 (t, *J* = 31.8 Hz, 1C), 172.7 (d, *J* = 10.4 Hz, 1C), 144.4, 134.5, 131.6 (t, *J* = 3.4 Hz, 1C), 131.4, 131.3 (d, *J* = 2.4 Hz, 1C), 130.7, 130.2 (t, *J* = 3.2 Hz, 1C), 129.7, 128.5, 126.3 (d, *J* = 4.2 Hz, 1C), 125.8 (d, *J* = 5.5 Hz, 1C), 123.2, 122.4, 117.3 (dd, *J* = 269.7, 262.9 Hz, 1C), 109.1, 58.1 (t, *J* = 20.4 Hz, 1C), 26.8; <sup>19</sup>F NMR (376 MHz, CDCl<sub>3</sub>): δ -97.25 (d, *J* = 310.2 Hz, 1F), -98.96 (d, *J* = 310.6 Hz, 1F); IR (ATR): 2978, 2360, 1710, 1608, 1265, 1101, 1078, 742 cm<sup>-1</sup>; HRMS (ESI-TOF) *m/z*: [M+Na]<sup>+</sup> Calcd for C<sub>23</sub>H<sub>17</sub><sup>79</sup>BrF<sub>2</sub>NO<sub>2</sub> 456.0411; Found 456.0427.

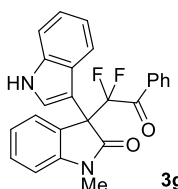

Column chromatography with PE/EtOAc (5/1, v/v) afforded product **3g** in 37% yield (38.5 mg) as white solid (m.p. 174-176°C). <sup>1</sup>H NMR (400 MHz, CDCl<sub>3</sub>): δ 8.38 (s, br, 1H), 7.96 (d, *J* = 7.2 Hz, 2H), 7.89 (dd, *J* = 8.1, 2.8 Hz, 1H), 7.59-7.55 (m, 1H), 7.50 (dd, *J* = 7.3, 2.7 Hz, 1H), 7.42-7.38 (m, 3H), 7.32-7.30 (m, 1H), 7.18-7.16 (m, 2H), 7.10-7.03 (m, 2H), 6.92 (d, *J* = 7.8 Hz, 1H), 3.26 (s, 3H); <sup>13</sup>C NMR (100 MHz, CDCl<sub>3</sub>): δ 187.8 (t, *J* = 32.9 Hz, 1C), 173.2 (d, *J* = 9.7 Hz, 1C), 144.4, 136.8, 134.3, 132.1 (t, *J* = 3.5 Hz, 1C),

130.1 (t,  $J = 3.0$  Hz, 1C), 129.4, 128.5, 127.1 (d,  $J = 6.3$  Hz, 1C), 126.2, 126.1, 125.7 (d,  $J = 4.1$  Hz, 1C), 122.4 (d,  $J = 6.2$  Hz, 1C), 122.2 (d,  $J = 5.6$  Hz, 1C), 120.1, 118.6 (dd,  $J = 267.4, 260.7$  Hz, 1C), 111.3, 108.6, 107.7, 56.5 (t,  $J = 22.1$  Hz, 1C), 26.6;  $^{19}\text{F}$  NMR (376 MHz,  $\text{CDCl}_3$ ): -96.63 (d,  $J = 305.7$  Hz, 1F), -99.40 (d,  $J = 306.6$  Hz, 1F); IR (ATR): 2974, 2358, 1610, 1288, 1257, 1047  $\text{cm}^{-1}$ ; HRMS (ESI)  $m/z$ :  $[\text{M}+\text{Na}]^+$  Calcd for  $\text{C}_{25}\text{H}_{18}\text{F}_2\text{N}_2\text{O}_2\text{Na}$  439.1229; Found 439.1225.

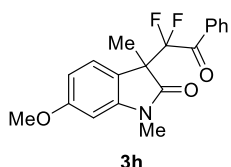

Column chromatography with PE/EtOAc (5/1, v/v) afforded product **3h** in 57%

yield (49.2 mg) as white solid (m.p. 89-91 °C).  $^1\text{H}$  NMR (400 MHz,  $\text{CDCl}_3$ ):  $\delta$

7.96-7.94 (m, 2H), 7.59-7.55 (m, 1H), 7.44-7.39 (m, 2H), 7.17 (dd,  $J = 8.5, 1.1$

Hz, 1H), 6.49-6.46 (m, 2H), 3.81 (s, 3H), 3.24 (s, 3H), 1.65 (s, 3H);  $^{13}\text{C}$  NMR (100 MHz,  $\text{CDCl}_3$ ):

$\delta$  187.5 (t,  $J = 31.6$  Hz, 1C), 175.5 (d,  $J = 8.6$  Hz, 1C), 160.9, 145.1, 134.2, 132.0 (t,  $J = 3.2$  Hz, 1C),

130.1 (t,  $J = 3.2$  Hz, 1C), 128.4, 124.7 (d,  $J = 2.6$  Hz, 1C), 120.6 (d,  $J = 4.7$  Hz, 1C), 118.3 (dd,  $J =$

265.1, 260.6 Hz, 1C), 106.3, 96.4, 55.4 (t,  $J = 2.8$  Hz, 1C), 51.2 (d,  $J = 22.3$  Hz, 1C), 26.5, 18.3 (t,

$J = 5.1$  Hz, 1C);  $^{19}\text{F}$  NMR (376 MHz,  $\text{CDCl}_3$ ):  $\delta$  -102.12 (d,  $J = 306.9$  Hz, 1F), -103.17 (d,  $J = 306.6$

Hz, 1F); IR (ATR): 2885, 2360, 1724, 1510, 1186, 1051, 883, 763  $\text{cm}^{-1}$ ; HRMS (ESI-TOF)  $m/z$ :

$[\text{M}+\text{Na}]^+$  Calcd for  $\text{C}_{19}\text{H}_{18}\text{F}_2\text{NO}_3$  346.1255; Found 346.1281.

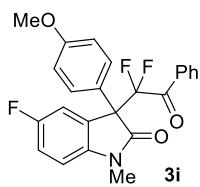

Column chromatography with PE/EtOAc (10/1, v/v) afforded product **3i** in 92%

yield (97.8 mg) as yellow solid (m.p. 168-170 °C).  $^1\text{H}$  NMR (400 MHz,  $\text{CDCl}_3$ ):  $\delta$

7.97 (dd,  $J = 7.4, 4.0$  Hz, 2H), 7.76 (dd,  $J = 8.9, 1.1$  Hz, 2H), 7.61-7.58 (m, 1H),

7.42 (t,  $J = 7.9$  Hz, 2H), 7.32 (dt,  $J = 8.1$  Hz, 2.3 Hz, 1H), 7.08 (td,  $J = 8.8, 2.6$  Hz,

1H), 6.93-6.91 (m, 2H), 6.84 (dd,  $J = 8.6, 4.3$  Hz, 1H), 3.80 (s, 3H), 3.27 (s, 3H);  $^{13}\text{C}$  NMR (100

MHz,  $\text{CDCl}_3$ ):  $\delta$  187.3 (t,  $J = 32.2$  Hz, 1C), 173.2 (d,  $J = 10.4$  Hz, 1C), 159.8, 158.6 (d,  $J = 240.5$

Hz, 1C), 140.4, 134.6, 131.4 (t,  $J = 3.4$  Hz, 1C), 130.6 (d,  $J = 1.5$  Hz, 1C), 130.2 (t,  $J = 3.0$  Hz, 1C),

128.6, 128.1 (dd,  $J = 8.4, 5.5$  Hz, 1C), 122.6, 117.4 (dd,  $J = 267.7, 260.0$  Hz, 1C), 115.5 (d,  $J = 23.1$

Hz, 1C), 114.4 (dd,  $J = 25.8, 2.9$  Hz, 1C), 113.7, 109.2 (d,  $J = 8.2$  Hz, 1C), 58.2 (t,  $J = 21.7$  Hz, 1C),

55.2 (d,  $J = 5.2$  Hz, 1C), 26.8;  $^{19}\text{F}$  NMR (376 MHz,  $\text{CDCl}_3$ ):  $\delta$  -97.36 (d,  $J = 314.7$  Hz, 1F), -99.32

(d,  $J = 314.8$  Hz, 1F), -120.41 (s, 1F); IR (ATR): 2976, 1714, 1697, 1512, 1259, 1078, 1051, 812

$\text{cm}^{-1}$ ; HRMS (ESI-TOF)  $m/z$ :  $[\text{M}+\text{Na}]^+$  Calcd for  $\text{C}_{24}\text{H}_{18}\text{F}_3\text{NO}_3\text{Na}$  448.1136; Found 448.1148.

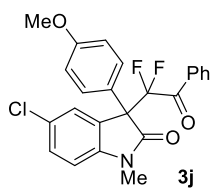

Column chromatography with PE/EtOAc (10/1, v/v) afforded product **3j** in 85%

yield (93.7 mg) as white solid (m.p. 185-187 °C). <sup>1</sup>H NMR (400 MHz, CDCl<sub>3</sub>): δ 7.97 (d, *J* = 7.4 Hz, 2H), 7.74 (dd, *J* = 8.9, 1.1 Hz, 2H), 7.62-7.58 (m, 1H), 7.53 (t, *J* = 1.9 Hz, 1H), 7.43 (t, *J* = 7.9 Hz, 2H), 7.35 (dd, *J* = 8.3, 2.1 Hz, 1H), 6.94-

6.91 (m, 2H), 6.84 (d, *J* = 8.4 Hz, 1H), 3.81 (s, 3H), 3.27 (s, 3H); <sup>13</sup>C NMR (100 MHz, CDCl<sub>3</sub>): δ 187.3 (t, *J* = 32.7 Hz, 1C), 173.1 (d, *J* = 10.7 Hz, 1C), 159.9, 143.0, 134.7, 131.4 (t, *J* = 3.4 Hz, 1C), 130.7 (d, *J* = 1.7 Hz, 1C), 130.3 (t, *J* = 2.9 Hz, 1C), 129.2, 128.6, 128.4 (d, *J* = 5.4 Hz, 1C), 127.4, 126.4 (d, *J* = 4.6 Hz, 1C), 122.4, 117.4 (dd, *J* = 269.3, 261.9 Hz, 1C), 113.7, 109.7, 58.1 (t, *J* = 20.8 Hz, 1C), 55.3 (d, *J* = 4.8 Hz, 1C), 26.8; <sup>19</sup>F NMR (376 MHz, CDCl<sub>3</sub>): δ -97.19 (d, *J* = 315.2 Hz, 1F), -99.15 (d, *J* = 315.9 Hz, 1F); IR (ATR): 2976, 1701, 1608, 1257, 1099 1051, 881, 734 cm<sup>-1</sup>; HRMS (ESI) *m/z*: [M+Na]<sup>+</sup> Calcd for C<sub>24</sub>H<sub>18</sub><sup>35</sup>ClF<sub>2</sub>NO<sub>3</sub>Na 464.0835; Found 464.0840.

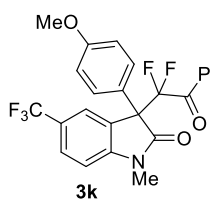

Column chromatography with PE/EtOAc (10/1, v/v) afforded product **3k** in 59%

yield (70.1 mg) as white solid (m.p. 172-174 °C). <sup>1</sup>H NMR (400 MHz, CDCl<sub>3</sub>): δ 7.95 (d, *J* = 7.4 Hz, 2H), 7.76 (s, 1H), 7.70 (dd, *J* = 8.9, 1.2 Hz, 2H), 7.66 (d, *J* = 8.2 Hz, 1H), 7.62-7.58 (m, 1H), 7.43 (t, *J* = 7.9 Hz, 2H), 6.99 (d, *J* = 8.2 Hz,

1H), 6.94-6.90 (m, 2H), 3.80 (s, 3H), 3.31 (s, 3H); <sup>13</sup>C NMR (100 MHz, CDCl<sub>3</sub>): δ 187.4 (t, *J* = 32.4 Hz, 1C), 173.4 (d, *J* = 10.8 Hz, 1C), 160.0, 147.3, 134.8, 131.3 (t, *J* = 3.5 Hz, 1C), 130.7 (d, *J* = 1.8 Hz, 1C), 130.3 (t, *J* = 3.1 Hz, 1C), 128.6, 127.4 (d, *J* = 5.5 Hz, 1C), 127.1 (q, *J* = 3.8 Hz, 1C), 125.6, 124.4 (q, *J* = 32.8 Hz, 1C), 122.9 (t, *J* = 3.9 Hz, 1C), 122.1, 117.4 (dd, *J* = 269.6, 262.0 Hz, 1C), 113.9, 108.6, 57.8 (t, *J* = 22.8 Hz, 1C), 55.3 (d, *J* = 3.4 Hz, 1C), 26.9; <sup>19</sup>F NMR (376 MHz, CDCl<sub>3</sub>): δ -61.28 (s, 3F), -97.07 (d, *J* = 316.0 Hz, 1F), -99.29 (d, *J* = 315.3 Hz, 1F); IR (ATR): 2978, 1691, 1608, 1328, 1259, 1101, 740, 700 cm<sup>-1</sup>; HRMS (ESI-TOF) *m/z*: [M+Na]<sup>+</sup> Calcd for C<sub>25</sub>H<sub>19</sub>F<sub>5</sub>NO<sub>3</sub> 476.1285; Found 476.1266.

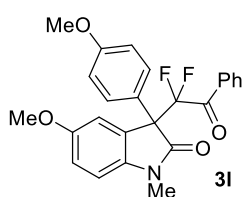

Column chromatography with PE/EtOAc (15/1, v/v) afforded product **3l** in 73%

yield (79.8 mg) as yellow solid (m.p. 167-169 °C). <sup>1</sup>H NMR (400 MHz, CDCl<sub>3</sub>): δ 7.94 (d, *J* = 7.4 Hz, 2H), 7.78 (dd, *J* = 9.0, 1.2 Hz, 2H), 7.60-7.55 (m, 1H), 7.43-7.39 (m, 2H), 7.15 (t, *J* = 2.4 Hz, 1H), 6.92-6.87 (m, 3H), 6.81 (d, *J* = 8.5

Hz, 1H), 3.80 (s, 3H), 3.77 (s, 3H), 3.23 (s, 3H); <sup>13</sup>C NMR (100 MHz, CDCl<sub>3</sub>): δ 187.4 (t, *J* = 32.4

Hz, 1C), 173.1 (t,  $J = 10.5$  Hz, 1C), 159.7, 155.4, 137.9, 134.4, 131.8 (t,  $J = 3.3$  Hz, 1C), 130.7 (d,  $J = 3.0$  Hz, 1C), 130.2 (t,  $J = 32.4$  Hz, 1C), 128.5, 127.8 (d,  $J = 5.4$  Hz, 1C), 123.2, 117.5 (dd,  $J = 268.9, 261.9$  Hz, 1C), 114.3 (d,  $J = 3.7$  Hz, 1C), 113.6, 113.0, 109.0, 58.3 (t,  $J = 20.6$  Hz, 1C), 55.8 (d,  $J = 3.5$  Hz, 1C), 55.2 (d,  $J = 3.7$  Hz, 1C), 26.8;  $^{19}\text{F}$  NMR (376 MHz,  $\text{CDCl}_3$ ):  $\delta$  -97.44 (d,  $J = 311.8$  Hz, 1F), -99.51 (d,  $J = 311.9$  Hz, 1F); IR (ATR): 2978, 1701, 1608, 1510, 1099, 1049, 805, 700  $\text{cm}^{-1}$ ; HRMS (ESI-TOF)  $m/z$ :  $[\text{M}+\text{Na}]^+$  Calcd for  $\text{C}_{25}\text{H}_{21}\text{F}_2\text{NO}_4\text{Na}$  460.1336; Found 460.1351.

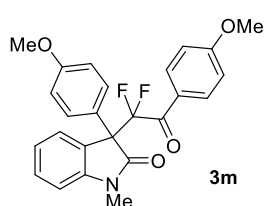

Column chromatography with PE/EtOAc (4/1, v/v) afforded product **3m** in 88% yield (96.1 mg) as yellow solid (m.p. 131-133 °C).  $^1\text{H}$  NMR (400 MHz,  $\text{CDCl}_3$ ):  $\delta$  7.96 (d,  $J = 8.9$  Hz, 2H), 7.80 (d,  $J = 8.0$  Hz, 2H), 7.56 (d,  $J = 7.1$  Hz, 1H), 7.36 (td,  $J = 7.8$  Hz, 0.9 Hz, 1H), 7.07 (td,  $J = 7.6$  Hz, 0.6 Hz, 1H),

6.93-6.86 (m, 5H), 3.84 (s, 3H), 3.79 (s, 3H), 3.27 (s, 3H);  $^{13}\text{C}$  NMR (100 MHz,  $\text{CDCl}_3$ ):  $\delta$  185.7 (t,  $J = 32.1$  Hz, 1C), 173.5 (t,  $J = 10.7$  Hz, 1C), 164.5, 159.6, 144.3, 132.8 (t,  $J = 3.3$  Hz, 1C), 130.8 (d,  $J = 1.2$  Hz, 1C), 129.2, 126.8 (d,  $J = 5.5$  Hz, 1C), 126.1 (d,  $J = 4.1$  Hz, 1C), 124.5 (t,  $J = 3.4$  Hz, 1C), 123.3, 122.0, 117.8 (dd,  $J = 268.7, 262.1$  Hz, 1C), 113.8, 113.5, 108.7, 57.9 (t,  $J = 20.6$  Hz, 1C), 55.5 (d,  $J = 3.2$  Hz, 1C), 55.2 (d,  $J = 3.2$  Hz, 1C), 26.6;  $^{19}\text{F}$  NMR (376 MHz,  $\text{CDCl}_3$ ):  $\delta$  -96.60 (d,  $J = 310.3$  Hz, 1F), -98.43 (d,  $J = 310.5$  Hz, 1F); IR (ATR): 2976, 2360, 1512, 1444, 1257, 1087  $\text{cm}^{-1}$ ; HRMS (ESI-TOF)  $m/z$ :  $[\text{M}+\text{Na}]^+$  Calcd for  $\text{C}_{25}\text{H}_{21}\text{F}_2\text{NO}_4\text{Na}$  460.1336; Found 460.1351.

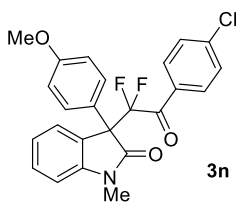

Column chromatography with PE/EtOAc (15/1, v/v) afforded product **3n** in 79% yield (87.1 mg) as white solid (m.p. 119-121 °C).  $^1\text{H}$  NMR (400 MHz,  $\text{CDCl}_3$ ):  $\delta$  7.88 (d,  $J = 8.6$  Hz, 2H), 7.77 (d,  $J = 7.6$ , 2H), 7.57-7.50 (m, 1H), 7.42-7.33 (m, 3H), 7.08 (td,  $J = 7.6$  Hz, 1.1 Hz, 1H), 6.93-6.86 (m, 3H), 3.79 (s, 3H), 3.26

(s, 3H);  $^{13}\text{C}$  NMR (125 MHz,  $\text{CDCl}_3$ ):  $\delta$  186.5 (t,  $J = 32.3$  Hz, 1C), 173.2 (d,  $J = 10.8$  Hz, 1C), 159.8, 144.3, 141.1, 131.5 (t,  $J = 2.8$  Hz, 1C), 130.8 (d,  $J = 2.3$  Hz, 1C), 130.1 (t,  $J = 3.5$  Hz, 1C), 129.4, 128.9, 126.4 (d,  $J = 5.8$  Hz, 1C), 126.2 (d,  $J = 4.1$  Hz, 1C), 123.0, 122.2, 117.4 (dd,  $J = 266.5, 260.0$  Hz, 1C), 113.6, 108.9, 57.8 (t,  $J = 20.2$  Hz, 1C), 55.2, 26.7;  $^{19}\text{F}$  NMR (376 MHz,  $\text{CDCl}_3$ ):  $\delta$  -97.45 (d,  $J = 311.4$  Hz, 1F), -99.46 (d,  $J = 310.7$  Hz, 1F); IR (ATR): 1708, 1512, 1259, 1089, 1051, 881, 694  $\text{cm}^{-1}$ ; HRMS (ESI)  $m/z$ :  $[\text{M}+\text{Na}]^+$  Calcd for  $\text{C}_{24}\text{H}_{18}^{35}\text{ClF}_2\text{NO}_3\text{Na}$  464.0835; Found 464.0831.

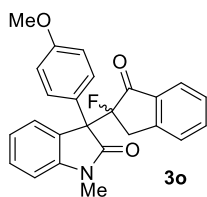

Column chromatography with PE/EtOAc (6/1, v/v) afforded product **3o** in 57% yield (57.1 mg) as white solid (m.p. 181-183 °C). <sup>1</sup>H and <sup>19</sup>F NMR analysis of the

crude mixture revealed that the dr was >20:1. <sup>1</sup>H NMR (400 MHz, CDCl<sub>3</sub>): δ 7.66-7.63 (m, 2H), 7.58-7.54 (m, 2H), 7.32-7.30 (m, 2H), 7.28-7.24 (m, 2H), 6.88-

6.82 (m, 4H), 3.78 (s, 3H), 3.59-3.50 (m, 1H), 3.36-3.30 (m, 1H), 3.24 (s, 3H); <sup>13</sup>C NMR (100 MHz, CDCl<sub>3</sub>): δ 197.2 (d, *J* = 19.0 Hz, 1C), 173.6 (d, *J* = 4.2 Hz, 1C), 159.3, 149.8 (d, *J* = 2.9 Hz, 1C), 144.4, 136.0, 134.9, 130.0, 129.9, 129.3, 128.1, 126.8, 126.2, 125.9, 124.7, 122.0, 113.7, 108.7, 98.9 (d, *J* = 201.6 Hz, 1C), 55.2 (d, *J* = 3.1 Hz, 1C), 38.3 (d, *J* = 24.7 Hz, 1C), 26.5; <sup>19</sup>F NMR (376 MHz, CDCl<sub>3</sub>): δ -157.71 (s, 1F); IR (ATR): 2976, 2358, 1444, 1259, 1089, 1052, 852, 605 cm<sup>-1</sup>; HRMS (ESI) *m/z*: [M+Na]<sup>+</sup> Calcd for C<sub>25</sub>H<sub>20</sub>FNO<sub>3</sub>Na 424.1319; Found 424.1325.

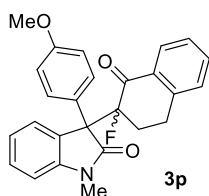

Column chromatography with PE/EtOAc (5/1, v/v) afforded product **3p** in 47% yield (48.8 mg) as white solid (m.p. 174-176 °C). <sup>1</sup>H and <sup>19</sup>F NMR analysis of the

crude mixture revealed that the dr was >20:1. <sup>1</sup>H NMR (400 MHz, CDCl<sub>3</sub>): δ 7.79 (d, *J* = 8.0 Hz, 1H), 7.71 (d, *J* = 8.0 Hz, 2H), 7.46-7.42 (m, 2H), 7.33 (t, *J* = 7.2

Hz, 1H), 7.26-7.17 (m, 2H), 7.00 (t, *J* = 7.9 Hz, 1H), 6.91-6.85 (m, 3H), 3.78 (s, 3H), 3.27 (s, 3H), 3.22-3.14 (m, 1H), 2.75 (dt, *J* = 4.0, 16.8 Hz, 1H), 2.58-2.35 (m, 2H); <sup>13</sup>C NMR (100 MHz, CDCl<sub>3</sub>): δ 189.8 (d, *J* = 21.2 Hz, 1C), 175.4 (d, *J* = 2.2 Hz, 1C), 159.3, 145.0, 143.2, 133.8, 131.6, 130.7 (d, *J* = 3.5 Hz, 1C), 129.0, 128.5, 128.2, 127.2 (d, *J* = 6.0 Hz, 1C), 126.9, 126.4, 126.3, 121.4, 113.5, 108.8, 97.1 (d, *J* = 192.3 Hz, 1C), 58.3 (d, *J* = 19.8 Hz, 1C), 55.2, 31.3 (d, *J* = 6.9 Hz, 1C), 26.6, 24.7 (d, *J* = 7.0 Hz, 1C); <sup>19</sup>F NMR (376 MHz, CDCl<sub>3</sub>): δ -166.54 (s, 1F); IR (ATR): 2974, 2358, 1597, 1276, 1257, 1093, 758, 659 cm<sup>-1</sup>; HRMS (ESI-TOF) *m/z*: [M+Na]<sup>+</sup> Calcd for C<sub>26</sub>H<sub>22</sub>FNO<sub>3</sub>Na 438.1476; Found 438.1467.

## 2.2 The reaction of acyclic tertiary alcohols **4** with difluoroenoxyasilane **1a**

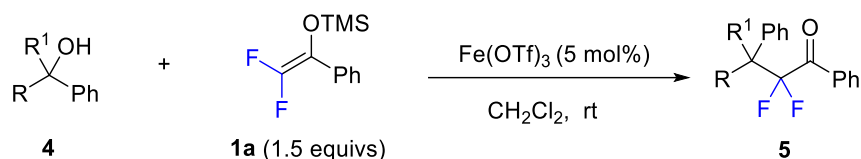

Under an atmosphere of N<sub>2</sub>, to a 25 mL flame-dried Schleck tube were added acyclic tertiary alcohols **4** (0.25 mmol, 1.0 equiv) and Fe(OTf)<sub>3</sub> (0.0125 mmol, 6.3 mg, 5.0 mol%), followed by the addition of anhydrous CH<sub>2</sub>Cl<sub>2</sub> (2.5 mL). After being stirred at room temperature for about 5 min, difluoroenoxyasilane **1a** (0.375 mmol, 1.5 equivs) was then added. The resulting mixture was stirred at room temperature until full conversion of **4** by TLC analysis. The reaction mixture was then concentrated under reduced pressure to give the residue, which was purified by silica gel column chromatography to afford the products **5**, using the indicated eluent.

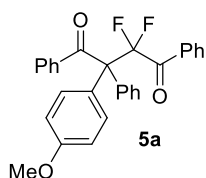

Column chromatography with PE/EtOAc (16/1, v/v) afforded product **5a** in 62% yield (70.7 mg) as white solid (m.p. 52-54 °C). <sup>1</sup>H NMR (400 MHz, CDCl<sub>3</sub>): δ 7.92-7.89 (m, 2H), 7.56-7.48 (m, 3H), 7.48-7.44 (m, 4H), 7.42-7.38 (m, 2H), 7.36-7.31 (m, 4H), 7.20-7.16 (m, 2H), 6.89-6.87 (m, 2H), 3.81 (s, 3H); <sup>13</sup>C NMR (100 MHz, CDCl<sub>3</sub>): δ 197.9 (t, *J* = 2.5 Hz, 1C), 189.7 (t, *J* = 32.1 Hz, 1C), 159.1, 138.2, 136.2, 133.7 (t, *J* = 2.4 Hz, 1C), 133.4, 132.6 (t, *J* = 2.2 Hz, 1C), 131.4, 131.3 (t, *J* = 2.2 Hz, 1C), 130.2, 129.9 (t, *J* = 3.4 Hz, 1C), 128.2, 128.0, 127.9, 127.7 (t, *J* = 1.8 Hz, 1C), 127.5, 118.5 (t, *J* = 266.2 Hz, 1C), 113.4, 70.4 (t, *J* = 18.9 Hz, 1C), 55.1; <sup>19</sup>F NMR (376 MHz, CDCl<sub>3</sub>): δ -94.29 (s, 2F); IR (ATR): 2927, 2360, 1598, 1512, 1448, 1255, 1018, 812 cm<sup>-1</sup>; HRMS (ESI-TOF) *m/z*: [M+Na]<sup>+</sup> Calcd for C<sub>29</sub>H<sub>22</sub>F<sub>2</sub>O<sub>3</sub>Na 479.1435; Found 479.1423.

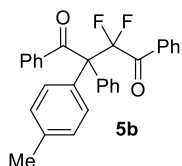

Column chromatography with PE/EtOAc (20/1, v/v) afforded product **5b** in 59% yield (64.9 mg) as white solid (m.p. 143-145 °C). <sup>1</sup>H NMR (400 MHz, CDCl<sub>3</sub>): δ 7.87 (d, *J* = 7.7 Hz, 2H), 7.55-7.52 (m, 3H), 7.44-7.37 (m, 6H), 7.33-7.31 (m, 4H), 7.17-7.13 (m, 4H), 2.35 (s, 3H); <sup>13</sup>C NMR (100 MHz, CDCl<sub>3</sub>): δ 197.9, 189.6 (t, *J* = 32.1 Hz, 1C), 138.1, 137.8, 136.1, 133.6 (t, *J* = 2.7 Hz, 1C), 133.4, 132.8, 131.6, 131.4, 131.2, 130.2, 129.9 (t, *J* = 3.4 Hz, 1C), 128.8, 128.2, 128.0, 127.9, 127.5, 118.4 (t, *J* = 266.4 Hz, 1C), 70.6 (t, *J* = 18.8 Hz, 1C), 21.0 (d, *J* = 1.9 Hz, 1C); <sup>19</sup>F NMR (376 MHz, CDCl<sub>3</sub>): δ -94.40 (s, 2F); IR (ATR): 2974, 2927, 2358,

1587, 1276, 1257, 1093, 758  $\text{cm}^{-1}$ ; HRMS (ESI-TOF)  $m/z$ :  $[\text{M}+\text{Na}]^+$  Calcd for  $\text{C}_{29}\text{H}_{22}\text{F}_2\text{O}_2\text{Na}$  463.1486; Found 463.1472.

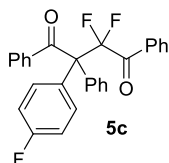

Column chromatography with PE/EtOAc (20/1, v/v) afforded product **5c** in 41% yield (45.5 mg) as white solid (m.p. 101-103  $^{\circ}\text{C}$ ).  $^1\text{H}$  NMR (400 MHz,  $\text{CDCl}_3$ ):  $\delta$  7.89 (d,  $J = 7.6$  Hz, 2H), 7.57-7.52 (m, 3H), 7.48-7.44 (m, 2H), 7.42-7.31 (m, 8H), 7.18 (t,  $J = 7.8$  Hz, 2H), 7.01 (t,  $J = 8.6$  Hz, 2H);  $^{13}\text{C}$  NMR (100 MHz,  $\text{CDCl}_3$ ):  $\delta$  197.6, 189.4 (t,  $J = 31.9$  Hz, 1C), 162.2 (d,  $J = 247.0$  Hz, 1C), 138.1, 135.8, 133.7, 133.4 (d,  $J = 7.5$  Hz, 1C), 131.9, 131.6, 131.1, 130.1, 129.9 (t,  $J = 3.1$  Hz, 1C), 128.3 (d,  $J = 7.1$  Hz, 1C), 128.2, 127.6, 118.4 (t,  $J = 267.2$  Hz, 1C), 114.9 (d,  $J = 21.2$  Hz, 1C), 70.4 (t,  $J = 18.8$  Hz, 1C);  $^{19}\text{F}$  NMR (376 MHz,  $\text{CDCl}_3$ ):  $\delta$  -93.42 (d,  $J = 294.8$  Hz, 1F), -94.41 (d,  $J = 295.8$  Hz, 1F), -113.93 (s, 1F); IR (ATR): 2885, 2360, 1724, 1510, 1271, 1089, 1051, 881  $\text{cm}^{-1}$ ; HRMS (ESI)  $m/z$ :  $[\text{M}+\text{Na}]^+$  Calcd for  $\text{C}_{28}\text{H}_{20}\text{F}_3\text{O}_2$  467.1229; Found 467.1228.

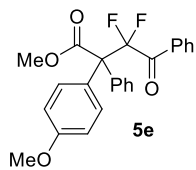

Column chromatography with PE/EtOAc (15/1, v/v) afforded product **5e** in 54% yield (55.4 mg) as white solid (m.p. 90-92  $^{\circ}\text{C}$ ).  $^1\text{H}$  NMR (400 MHz,  $\text{CDCl}_3$ ):  $\delta$  8.05 (d,  $J = 7.5$  Hz, 2H), 7.59 (t,  $J = 7.4$  Hz, 1H), 7.44 (t,  $J = 7.8$  Hz, 2H), 7.33-7.30 (m, 2H), 7.30-7.28 (m, 3H), 7.24-7.22 (m, 2H), 6.83-6.79 (m, 2H), 3.78 (s, 3H), 3.77 (s, 3H);  $^{13}\text{C}$  NMR (100 MHz,  $\text{CDCl}_3$ ):  $\delta$  188.6 (t,  $J = 32.7$  Hz, 1C), 170.5, 158.8, 137.7, 134.2, 132.4 (t,  $J = 3.2$  Hz, 1C), 131.9, 130.4, 130.2 (t,  $J = 3.3$  Hz, 1C), 129.4, 128.5, 127.7, 127.6, 118.4 (t,  $J = 265.7$  Hz, 1C), 113.0, 65.3 (t,  $J = 20.4$  Hz, 1C), 55.1 (d,  $J = 3.1$  Hz, 1C), 52.7 (d,  $J = 3.3$  Hz, 1C);  $^{19}\text{F}$  NMR (376 MHz,  $\text{CDCl}_3$ ):  $\delta$  -92.40 (d,  $J = 309.3$  Hz, 1F), -93.35 (d,  $J = 308.1$  Hz, 1F); IR (ATR): 2976, 1720, 1510, 1253, 1082, 941, 808, 675  $\text{cm}^{-1}$ ; HRMS (ESI-TOF)  $m/z$ :  $[\text{M}+\text{Na}]^+$  Calcd for  $\text{C}_{24}\text{H}_{20}\text{F}_2\text{O}_4\text{Na}$  433.1227; Found 433.1241.

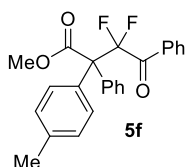

Column chromatography with PE/EtOAc (15/1, v/v) afforded product **5f** in 47% yield (46.3 mg) as white solid (m.p. 94-96  $^{\circ}\text{C}$ ).  $^1\text{H}$  NMR (400 MHz,  $\text{CDCl}_3$ ):  $\delta$  8.07 (d,  $J = 7.7$  Hz, 2H), 7.61-7.44 (m, 1H), 7.48-7.44 (m, 2H), 7.35-7.29 (m, 5H), 7.21 (d,  $J = 8.2$  Hz, 2H), 7.11 (d,  $J = 8.0$  Hz, 2H), 3.80 (s, 3H), 2.34 (s, 3H);  $^{13}\text{C}$  NMR (125 MHz,  $\text{CDCl}_3$ ):  $\delta$  188.6 (t,  $J = 32.5$  Hz, 1C), 170.5 (t,  $J = 4.0$  Hz, 1C), 137.6, 137.4, 134.5, 134.2, 132.4 (t,  $J = 3.3$  Hz, 1C), 130.6, 130.5, 130.3 (t,  $J = 3.3$  Hz, 1C), 128.5, 128.5, 127.7, 127.6, 118.5 (t,  $J = 263.7$  Hz,

1C), 65.6 (t,  $J = 20.0$  Hz, 1C), 52.8, 20.9;  $^{19}\text{F}$  NMR (376 MHz,  $\text{CDCl}_3$ ):  $\delta$  -92.79 (s, 2F); IR (ATR): 2974, 2358, 1707, 1514, 1288, 1257, 758, 727  $\text{cm}^{-1}$ ; HRMS (ESI-TOF)  $m/z$ :  $[\text{M}+\text{Na}]^+$  Calcd for  $\text{C}_{24}\text{H}_{20}\text{F}_2\text{O}_3\text{Na}$  417.1278; Found 417.1284.

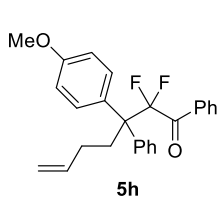

Column chromatography with PE/EtOAc (30/1, v/v) afforded product **5h** in 48%

yield (43.0 mg) as colorless oil.  $^1\text{H}$  NMR (400 MHz,  $\text{CDCl}_3$ ):  $\delta$  7.42 (d,  $J = 7.8$  Hz, 2H), 7.38-7.35 (m, 3H), 7.24-7.16 (m, 7H), 6.74-6.72 (m, 2H), 5.79-5.70 (m, 1H), 4.98-4.90 (m, 2H), 3.74 (s, 3H), 2.57-2.53 (m, 2H), 1.87-1.81 (m, 2H);  $^{13}\text{C}$

NMR (100 MHz,  $\text{CDCl}_3$ ):  $\delta$  191.5 (t,  $J = 30.1$  Hz, 1C), 158.5, 140.2, 138.4, 134.5, 132.9, 131.6, 131.4, 130.1, 129.5 (t,  $J = 4.1$  Hz, 1C), 127.8, 127.7, 127.1, 121.2 (t,  $J = 267.1$  Hz, 1C), 114.5, 113.1, 57.5 (t,  $J = 19.6$  Hz, 1C), 55.2, 34.7, 28.9;  $^{19}\text{F}$  NMR (376 MHz,  $\text{CDCl}_3$ ):  $\delta$  -97.42 (d,  $J = 256.4$  Hz, 1F), -99.14 (d,  $J = 256.8$  Hz, 1F); IR (ATR): 2922, 2358, 1691, 1598, 1512, 1253, 908, 823  $\text{cm}^{-1}$ ; HRMS (ESI)  $m/z$ :  $[\text{M}+\text{Na}]^+$  Calcd for  $\text{C}_{26}\text{H}_{24}\text{F}_2\text{O}_2\text{Na}$  429.1637; Found 429.1639.

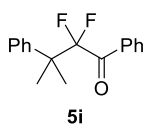

Column chromatography with PE/ $\text{CH}_2\text{Cl}_2$  (20/1, v/v) afforded product **5i** in 74% yield

(50.7 mg) as colorless oil.  $^1\text{H}$  NMR (400 MHz,  $\text{CDCl}_3$ ):  $\delta$  7.61-7.58 (m, 2H), 7.45-7.41 (m, 3H), 7.26-7.17 (m, 5H), 1.63 (s, 6H);  $^{13}\text{C}$  NMR (100 MHz,  $\text{CDCl}_3$ ):  $\delta$  191.1

(t,  $J = 30.5$  Hz, 1C), 140.9 (t,  $J = 2.4$  Hz, 1C), 134.2 (t,  $J = 2.0$  Hz, 1C), 133.3, 129.8 (t,  $J = 4.0$  Hz, 1C), 128.0 (t,  $J = 2.0$  Hz, 1C), 127.3, 120.6 (t,  $J = 261.1$  Hz, 1C), 44.5 (t,  $J = 21.0$  Hz, 1C), 22.9;  $^{19}\text{F}$  NMR (376 MHz,  $\text{CDCl}_3$ ):  $\delta$  -105.39 (s, 2F); IR (ATR): 1693, 1597, 1448, 1278, 1055, 908, 698, 608  $\text{cm}^{-1}$ ; HRMS (ESI-TOF)  $m/z$ :  $[\text{M}+\text{H}]^+$  Calcd for  $\text{C}_{17}\text{H}_{17}\text{F}_2\text{O}$  275.1247; Found 275.1240.

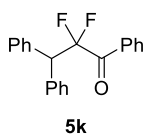

Column chromatography with PE/ $\text{CH}_2\text{Cl}_2$  (20/1, v/v) afforded product **5k** in 98% yield

(78.9 mg) as white solid (m.p. 46-48  $^\circ\text{C}$ ).  $^1\text{H}$  NMR (400 MHz,  $\text{CDCl}_3$ ):  $\delta$  7.81 (d,  $J = 7.8$  Hz, 2H), 7.44 (t,  $J = 7.4$  Hz, 1H), 7.31-7.27 (m, 6H), 7.20-7.10 (m, 6H), 4.93 (t,  $J = 18.1$  Hz, 1H);  $^{13}\text{C}$  NMR (100 MHz,  $\text{CDCl}_3$ ):  $\delta$  189.9 (t,  $J = 30.1$  Hz, 1C), 136.3 (t,  $J = 2.3$  Hz, 1C), 133.9, 132.9 (t,  $J = 2.2$  Hz, 1C), 129.8 (t,  $J = 3.4$  Hz, 1C), 129.6 (t,  $J = 2.0$  Hz, 1C), 128.5, 127.5, 118.9 (t,  $J = 259.2$  Hz, 1C), 54.9 (t,  $J = 21.0$  Hz, 1C);  $^{19}\text{F}$  NMR (376 MHz,  $\text{CDCl}_3$ ):  $\delta$  -99.90 (s, 2F); IR (ATR): 1701, 1598, 1496, 1450, 1170, 1118, 929, 698  $\text{cm}^{-1}$ ; HRMS (ESI-TOF)  $m/z$ :  $[\text{M}+\text{H}]^+$  Calcd for  $\text{C}_{21}\text{H}_{17}\text{F}_2\text{O}$  323.1247; Found 323.1265.



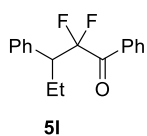

Column chromatography with PE/CH<sub>2</sub>Cl<sub>2</sub> (20/1, v/v) afforded product **5I** in 47% yield (32.2 mg) as colorless oil. <sup>1</sup>H NMR (400 MHz, CDCl<sub>3</sub>): δ 7.82 (d, *J* = 7.2 Hz, 2H), 7.51-7.46 (m, 1H), 7.35-7.32 (m, 2H), 7.22-7.14 (m, 5H), 3.42-3.30 (m, 1H), 2.02-1.93 (m, 1H), 1.88-1.76 (m, 1H), 0.73 (t, *J* = 7.2 Hz, 3H); <sup>13</sup>C NMR (125 MHz, CDCl<sub>3</sub>): δ 190.4 (t, *J* = 30.2 Hz, 1C), 135.2 (d, *J* = 4.5 Hz, 1C), 133.9, 133.0 (t, *J* = 2.5 Hz, 1C), 129.82 (t, *J* = 3.5 Hz, 1C), 129.8, 128.5, 128.4, 127.7, 119.5 (t, *J* = 257.5 Hz, 1C), 51.7 (t, *J* = 21.4 Hz, 1C), 21.3 (t, *J* = 4.1 Hz, 1C), 11.71; <sup>19</sup>F NMR (376 MHz, CDCl<sub>3</sub>): δ -103.42 (d, *J* = 272.8 Hz), -105.08 (d, *J* = 272.8 Hz); IR (ATR): 1705, 1450 1184, 912, 700, 688 cm<sup>-1</sup>; HRMS (ESI-TOF) *m/z*: [M+H]<sup>+</sup> Calcd for C<sub>17</sub>H<sub>17</sub>F<sub>2</sub>O 275.1247; Found 275.1240.

### 3. Transformation of products

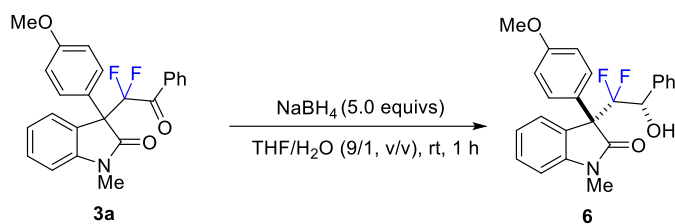

To a stirred solution of **3a** (61.1 mg, 0.15 mmol) in the mixed solvent of THF and H<sub>2</sub>O (1.5 mL, 9:1, v/v) was added NaBH<sub>4</sub> (28.4 mg, 0.75 mmol). The resulting mixture was stirred at room temperature until full consumption of **3a** by TLC analysis (about 1 h), and then quenched by saturated NH<sub>4</sub>Cl (aq.). The mixture was extracted with EtOAc (6 mL × 3), the combined organic layer was washed with brine, and dried over Na<sub>2</sub>SO<sub>4</sub>, filtered, and concentrated under vacuo. The obtained crude residue was purified by column chromatography (PE/EtOAc = 5/1, v/v) to give the corresponding alcohol **6** in 78% yield (47.8 mg) as white solid (m.p. 149-151 °C). <sup>1</sup>H and <sup>19</sup>F NMR analysis of the crude mixture revealed that the dr value was 5.6:1. The related configuration of the major isomer of product **6** was determined by its X-ray crystallographic structure. <sup>1</sup>H NMR (400 MHz, CDCl<sub>3</sub>) δ 7.74 (d, *J* = 8.7 Hz, 2H), 7.67 (d, *J* = 7.2 Hz, 1H), 7.35 (td, *J* = 7.8, 1.2 Hz, 1H), 7.29 (s, 5H), 7.13 (t, *J* = 7.6 Hz, 1H), 6.95-6.91 (m, 2H), 6.86 (d, *J* = 7.8 Hz, 1H), 5.57 (s, 1H), 4.99 (ddd, *J* = 19.9, 3.6, 2.0 Hz, 1H), 3.81 (s, 3H), 3.23 (s, 3H); <sup>13</sup>C NMR (100 MHz, CDCl<sub>3</sub>): δ 174.8 (dd, *J* = 8.4, 2.5 Hz, 1C), 159.6, 143.2, 136.4, 129.4 (d, *J* = 1.7 Hz, 1C), 129.2, 128.5, 127.8, 127.7 (d, *J* = 3.0 Hz, 1C), 127.2 (d, *J* = 4.8 Hz, 1C), 125.3 (d, *J* = 6.2 Hz, 1C), 123.4, 120.2 (dd, *J* = 260.0 Hz, 256.6 Hz, 1C), 114.2, 108.9, 73.9 (dd, *J* = 30.5, 23.1 Hz, 1C), 62.9 (dd, *J* = 27.8, 23.9 Hz, 1C), 55.3 (d, *J* = 3.1 Hz, 1C), 26.8; <sup>19</sup>F NMR (376 MHz, CDCl<sub>3</sub>): δ -101.42 (d, *J* = 265.5 Hz, 1F), -114.51 (d, *J* = 265.5 Hz, 1F); HRMS (ESI-TOF) *m/z*: [M+Na]<sup>+</sup> Calcd for C<sub>24</sub>H<sub>21</sub>F<sub>2</sub>NO<sub>3</sub>Na 432.1387; Found 432.1395.

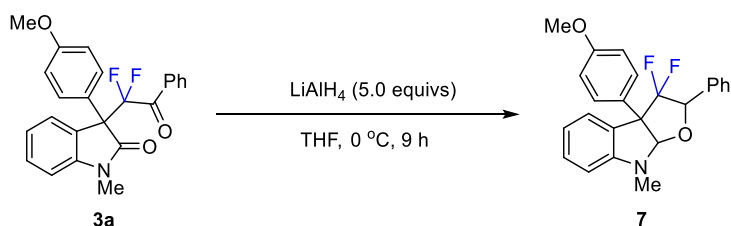

To a stirred solution of **3a** (41.1 mg, 0.10 mmol) in THF (2.5 mL) was added LiAlH<sub>4</sub> (20.0 mg,

0.5 mmol) at 0 °C. The resulting mixture was stirred at the same temperature until full consumption of **3a** by TLC analysis (about 9 h), and then quenched by saturated NaCl (aq.). The mixture was extracted with EtOAc (6 mL × 3), the combined organic layers were washed with brine, and dried over Na<sub>2</sub>SO<sub>4</sub>, filtered, and concentrated under vacuo. The obtained crude residue was purified by column chromatography (PE/EtOAc = 30/1, v/v) to give tricyclic product **7** in 89% yield (35.2 mg) as colorless oil. <sup>1</sup>H and <sup>19</sup>F NMR analysis of the crude mixture revealed that the dr value was 16:1. <sup>1</sup>H NMR (400 MHz, CDCl<sub>3</sub>) δ 7.42 (dd, *J* = 8.9, 1.4 Hz, 1H), 7.26-7.15 (m, 5H), 7.03-7.01 (m, 2H), 6.90-6.87 (m, 2H), 6.71 (td, *J* = 7.5, 1.0 Hz, 1H), 6.62 (d, *J* = 7.8 Hz, 1H), 5.83 (s, 1H), 5.27 (dd, *J* = 16.8, 6.8 Hz, 1H), 3.78 (s, 3H), 3.16 (s, 3H); <sup>13</sup>C NMR (125 MHz, CDCl<sub>3</sub>): δ 159.1, 149.7, 134.6 (d, *J* = 4.2 Hz, 1C), 129.3, 128.5, 128.1, 127.83, 127.76 (d, *J* = 1.9 Hz, 1C), 127.6 (d, *J* = 3.4 Hz, 1C), 127.5 (t, *J* = 2.3 Hz, 1C), 127.0 (dd, *J* = 210.2, 200.8 Hz, 1C), 126.8, 119.0, 113.9, 107.9, 102.1 (d, *J* = 6.9 Hz, 1C), 83.9 (dd, *J* = 26.8, 20.5 Hz, 1C), 62.9 (dd, *J* = 19.1, 17.4 Hz, 1C), 55.3, 31.5; <sup>19</sup>F NMR (376 MHz, CDCl<sub>3</sub>): δ -89.40 (d, *J* = 232.0 Hz, 1F), -107.52 (d, *J* = 232.0 Hz, 1F); IR (ATR): 2974, 2358, 1710, 1253, 1047, 823 cm<sup>-1</sup>; HRMS (ESI-TOF) *m/z*: [M+Na]<sup>+</sup> Calcd for C<sub>24</sub>H<sub>21</sub>F<sub>2</sub>NO<sub>2</sub>Na 416.1433; Found 416.1422.

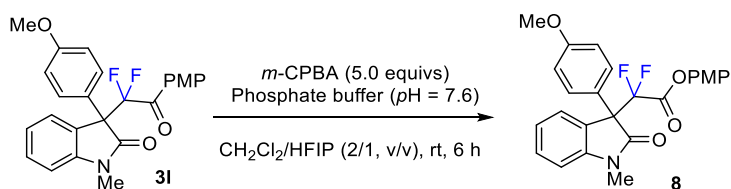

To a solution of compound **3I** (66.3 mg, 0.15 mmol, 1.0 equiv) in the mixed solvent of CH<sub>2</sub>Cl<sub>2</sub> and HFIP (3 mL, 2:1, v/v) was added *m*-chloroperoxybenzoic acid (*m*-CPBA, 154.5 mg, 0.75 mmol, 85 wt%, 5.0 equivs) and phosphate buffer (0.15 mL, pH = 7.6) subsequently.<sup>3</sup> The resulting mixture was stirred at room temperature until full consumption of **3I** by TLC analysis (about 6 h), then saturated NaHCO<sub>3</sub> (aq.) was added to quench the reaction. After extracting with CH<sub>2</sub>Cl<sub>2</sub> (6 mL × 3), the combined organic layer was washed with brine, then dried over anhydrous Na<sub>2</sub>SO<sub>4</sub>, and concentrated under reduced pressure. The crude residue was purified by column chromatography (PE/EtOAc = 4/1, v/v) to give the desired ester **8** in 73% yield (49.6 mg) as yellow solid (m.p. 134-136 °C). <sup>1</sup>H NMR (400 MHz, CDCl<sub>3</sub>): δ 7.74 (d, *J* = 8.9 Hz, 2H), 7.68 (d, *J* = 7.5 Hz, 1H), 7.47 (td,

<sup>3</sup> Kobayashi, S.; Tanaka, H.; Amii, H.; Uneyama, K. *Tetrahedron*. **2003**, 59, 1547

$J = 7.8$  Hz, 1.1 Hz, 1H), 7.23 (td,  $J = 7.7$  Hz, 0.8 Hz, 1H), 6.92-6.89 (m, 3H), 6.79-6.75 (m, 2H), 6.58-6.54 (m, 2H), 3.79 (s, 3H), 3.74 (s, 3H), 3.17 (s, 3H);  $^{13}\text{C}$  NMR (100 MHz,  $\text{CDCl}_3$ ):  $\delta$  171.7 (d,  $J = 6.4$  Hz, 1C), 161.0 (t,  $J = 33.8$  Hz, 1C), 159.9, 157.8, 144.5, 142.8, 130.3 (d,  $J = 2.8$  Hz, 1C), 127.4, 124.4 (d,  $J = 4.2$  Hz, 1C), 123.1 (d,  $J = 1.7$  Hz, 1C), 122.7, 121.3, 114.5, 114.1 (t,  $J = 263.0$  Hz, 1C), 113.8, 108.9, 58.3 (t,  $J = 23.1$  Hz, 1C), 55.5 (d,  $J = 3.2$  Hz, 1C), 55.2 (d,  $J = 3.4$  Hz, 1C), 26.7;  $^{19}\text{F}$  NMR (376 MHz,  $\text{CDCl}_3$ ):  $\delta$  -106.13 (d,  $J = 265.3$  Hz, 1F), -106.95 (d,  $J = 265.4$  Hz, 1F); IR (ATR): 2360, 1722, 1608, 1500, 1257, 1087, 1051, 881, 678  $\text{cm}^{-1}$ ; HRMS (ESI-TOF)  $m/z$ :  $[\text{M}+\text{Na}]^+$  Calcd for  $\text{C}_{25}\text{H}_{22}\text{F}_2\text{NO}_5$  454.1466; Found 454.1481.

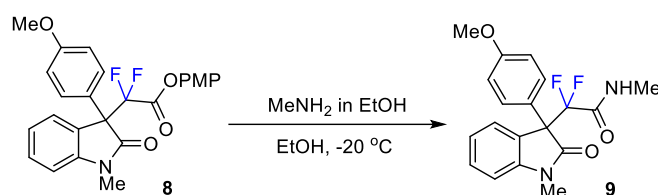

To a stirred solution of **8** (46.0 mg, 0.1 mmol) in EtOH (1.0 mL) was added  $\text{MeNH}_2$  (150.7 mg, 2.0 mmol, 37% in EtOH) at 0  $^\circ\text{C}$ . The resulting mixture was stirred at room temperature until full consumption of **8** by TLC analysis. The reaction mixture was concentrated under vacuo, and then purified by column chromatography (PE/EtOAc = 5/1, v/v) to give the fluorinated amide **9** in 99% yield (35.7 mg) as white solid (m.p. 133-135  $^\circ\text{C}$ ).  $^1\text{H}$  NMR (400 MHz,  $\text{CDCl}_3$ )  $\delta$  7.66 (d,  $J = 8.0$  Hz, 2H), 7.53 (d,  $J = 7.2$  Hz, 1H), 7.37 (t,  $J = 8.0$  Hz, 1H), 7.13 (t,  $J = 7.6$  Hz, 1H), 6.88-6.85 (m, 3H), 6.71 (s, 1H), 3.77 (s, 3H), 3.23 (s, 3H), 2.65 (d,  $J = 4.8$  Hz, 3H);  $^{13}\text{C}$  NMR (100 MHz,  $\text{CDCl}_3$ ):  $\delta$  172.8 (d,  $J = 8.2$  Hz, 1C), 162.7 (t,  $J = 28.8$  Hz, 1C), 159.7, 144.2, 130.0 (d,  $J = 2.3$  Hz), 129.7, 126.8, 125.8 (d,  $J = 5.1$  Hz, 1C), 124.0 (d,  $J = 3.1$  Hz, 1C), 122.5, 115.4 (dd,  $J = 339.0, 209.8$  Hz, 1C), 113.8, 108.9, 58.8 (t,  $J = 21.6$  Hz), 55.2, 26.7, 26.0;  $^{19}\text{F}$  NMR (376 MHz,  $\text{CDCl}_3$ ):  $\delta$  -104.14 (d,  $J = 264.0$  Hz, 1F), -105.98 (d,  $J = 264.0$  Hz, 1F); IR (ATR): 2974, 2358, 1608, 1290, 1257, 1091, 756  $\text{cm}^{-1}$ ; HRMS (ESI-TOF)  $m/z$ :  $[\text{M}+\text{Na}]^+$  Calcd for  $\text{C}_{19}\text{H}_{18}\text{F}_2\text{N}_2\text{O}_3\text{Na}$  383.1178; Found 383.1187.

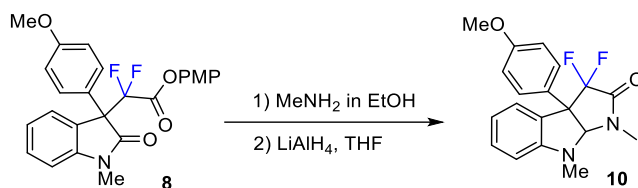

To a stirred solution of **8** (46.0 mg, 0.1 mmol) in EtOH (1.0 mL) was added MeNH<sub>2</sub> (151.2 mg, 2.0 mmol, 37% in EtOH) at 0 °C. The resulting mixture was stirred at room temperature until full consumption of **8** by TLC analysis. The reaction solution was concentrated under vacuo, and used directly for the next step without purification. To a stirred solution of above crude residue in THF (2.5 mL) was added LiAlH<sub>4</sub> (50.0 mg, 1.3 mmol). The resulting mixture was stirred at 0 °C until full consumption of intermediate by TLC analysis (about 2 h), and then quenched by saturated NaCl (aq.). The mixture was extracted with EtOAc (6 mL × 3), the combined organic layer was washed with brine, then dried over Na<sub>2</sub>SO<sub>4</sub>, filtered, and concentrated under vacuo. The crude residue was then purified by column chromatography (PE/EtOAc = 5/1, v/v) to give the tricyclic pyrroloindoline **10** in 77% yield (26.4 mg) as white solid (m.p. 148-150 °C). <sup>1</sup>H and <sup>19</sup>F NMR analysis of the crude mixture revealed that the dr value was above 20:1. <sup>1</sup>H NMR (400 MHz, CDCl<sub>3</sub>): δ 7.47 (dd, *J* = 7.6, 3.2 Hz, 1H), 7.32 (dd, *J* = 8.8, 1.2 Hz, 2H), 7.23 (t, *J* = 7.6 Hz, 1H), 6.88-6.81 (m, 3H), 6.53 (d, *J* = 8.0 Hz, 1H), 5.30 (s, 1H), 3.77 (s, 3H), 3.19 (s, 3H), 3.01 (s, 3H); <sup>13</sup>C NMR (100 MHz, CDCl<sub>3</sub>): δ 162.6 (t, *J* = 28.6 Hz, 1C), 159.4, 147.7, 130.2, 128.2 (d, *J* = 1.5 Hz, 1C), 128.0 (d, *J* = 5.7 Hz, 1C), 126.8, 126.5 (d, *J* = 3.8 Hz, 1C), 119.4, 116.7 (dd, *J* = 246.3, 257.2 Hz, 1C), 114.1, 108.4, 85.5 (d, *J* = 7.8 Hz, 1C), 59.9 (dd, *J* = 18.1, 5.2 Hz, 1C), 55.2, 34.7, 28.6; <sup>19</sup>F NMR (376 MHz, CDCl<sub>3</sub>): δ -97.30 (d, *J* = 266.6 Hz, 1F), -116.71 (d, *J* = 266.2 Hz, 1F); IR (ATR): 2974, 2358, 1714, 1604, 1514, 1259, 839 cm<sup>-1</sup>; HRMS (ESI-TOF) *m/z*: [M+Na]<sup>+</sup> Calcd for C<sub>19</sub>H<sub>18</sub>F<sub>2</sub>N<sub>2</sub>O<sub>2</sub>Na 367.1229; Found 367.1219.

#### 4. Control experiment and a proposed reaction pathway

To gain some insight into the reaction mechanism, the enantioenriched 3-hydroxyoxindole (*R*)-**2g** was chosen to react with **1a** under the standard conditions, which afforded the desired product **3g** in racemic form. Based on this result, and control experiments shown in Table 1 of main text, together with previous reports,<sup>4</sup> we temporarily proposed that the reaction was initiated by the dehydration of tertiary alcohols, under the action of *in-situ* generated HOTf from the hydrolysis of Fe(OTf)<sub>3</sub>, to produce a reactive carbocation intermediate which subsequently reacted with difluoroenoxy silanes **1** to give the targets.

##### Control experiment

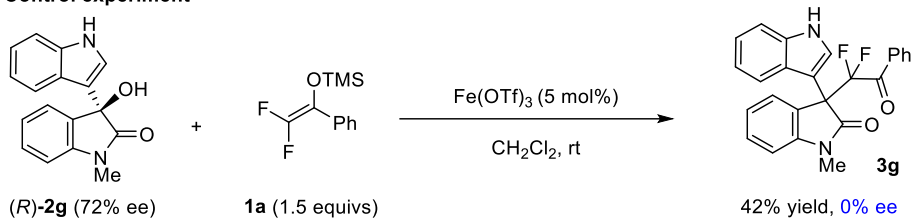

##### Proposed reaction pathway

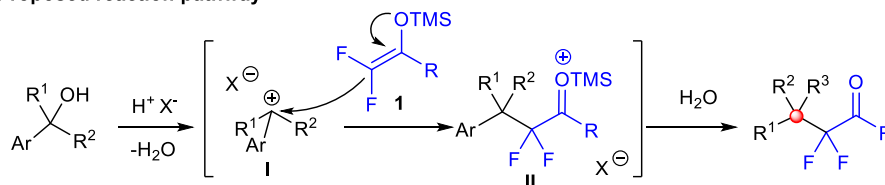

**General procedure:** The 3-hydroxyoxindole (*R*)-**2g** (72% ee) was synthesized according to the reported method.<sup>5</sup> Under an atmosphere of N<sub>2</sub>, to a 25 mL flame-dried Schleck tube were added (*R*)-**2g** (69.5 mg, 0.25 mmol, 72% ee) and Fe(OTf)<sub>3</sub> (0.0125 mmol, 6.3 mg, 5.0 mol%), followed by the addition of anhydrous CH<sub>2</sub>Cl<sub>2</sub> (2.5 mL). After being stirred at room temperature for about 5 min, difluoroenoxy silane **1a** (0.375 mmol, 1.5 equivs) was added. The resulting mixture was stirred at room temperature until full conversion of (*R*)-**2g** by TLC analysis. The reaction mixture was then concentrated under reduced pressure to give the residue, which was purified by silica gel column chromatography to afford the products **3g** with 42% yield (44.0 mg) as white solid, using PE/EtOAc (5/1, v/v) as eluent. HPLC analysis [Chiralpak AS-H, iPrOH/hexane = 20/80, 1.0 mL/min, 230 nm; t<sub>r</sub> = 11.68 min, t<sub>r</sub> = 14.73 min] indicated the enantioselectivity of product **3g** was 0%.

4 Zhu, F.; Zhou, F.; Cao, Z.-Y.; Wang, C.; Zhang, Y.-X.; Wang, C.-H.; J. Zhou, *Synthesis*, **2012**, 44, 3129.

5 Chauhan, P.; Chimni, S. S. *Chem. Eur. J.* **2010**, 16, 7709.

## 5. X-ray crystallographic data of **6** (CCDC 1939141)

Data intensity of **6** was collected using a Bruker SMART APEX-II (Mo radiation) at 293 K in a nitrogen stream. The X-ray condition of was 50 kV  $\times$  30 mA. Data collection and reduction were done by using the Bruker ApexII software package. The structures were solved by direct methods and refined by fullmatrix least-squares on  $F^2$  with anisotropic displacement parameters for non-H atoms using SHELX-97. Hydrogen atoms were added at their geometrically idea positions and refined isotropically. Crystal data for major isomer of **6**: C<sub>24</sub>H<sub>21</sub>F<sub>2</sub>NO<sub>3</sub>, T = 100(10) K, monoclinic, space group P2<sub>1</sub>/c, a = 18.4223(2) Å, b = 6.41470(10) Å, c = 16.93010(10) Å,  $\alpha$  = 90 deg,  $\beta$  = 102.9240(10) deg,  $\gamma$  = 90 deg, V = 1950.01(4) Å<sup>3</sup>. Z = 4, d<sub>calc</sub> = 1.395 mg/m<sup>3</sup>. Total number of reflections 42980 (R<sub>int</sub> = 0.0441), R<sub>1</sub> = 0.0355, wR<sub>2</sub> = 0.0824 (all data), GOF = 1.043, and 274 parameters.

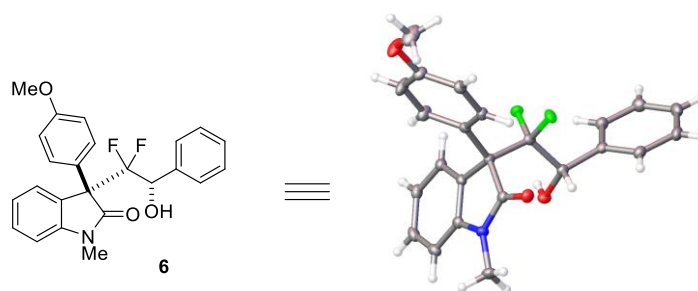

**Table S1.** Crystal data and structure refinement for **6**.

|                                  |                                                                |
|----------------------------------|----------------------------------------------------------------|
| Identification code              | <b>6</b>                                                       |
| Empirical formula                | C <sub>24</sub> H <sub>21</sub> F <sub>2</sub> NO <sub>3</sub> |
| Formula weight                   | 409.42                                                         |
| Temperature/K                    | 100.01(10)                                                     |
| Crystal system                   | monoclinic                                                     |
| Space group                      | P2 <sub>1</sub> /c                                             |
| a/Å                              | 18.4223(2)                                                     |
| b/Å                              | 6.41470(10)                                                    |
| c/Å                              | 16.93010(10)                                                   |
| $\alpha$ /°                      | 90                                                             |
| $\beta$ /°                       | 102.9240(10)                                                   |
| $\gamma$ /°                      | 90                                                             |
| Volume/Å <sup>3</sup>            | 1950.01(4)                                                     |
| Z                                | 4                                                              |
| $\rho_{\text{calc}}/\text{cm}^3$ | 1.395                                                          |

|                                                |                                                               |
|------------------------------------------------|---------------------------------------------------------------|
| $\mu/\text{mm}^{-1}$                           | 0.872                                                         |
| F(000)                                         | 856.0                                                         |
| Crystal size/ $\text{mm}^3$                    | $0.36 \times 0.28 \times 0.12$                                |
| Radiation                                      | $\text{CuK}\alpha$ ( $\lambda = 1.54184$ )                    |
| $2\Theta$ range for data collection/ $^\circ$  | 10.722 to 149.014                                             |
| Index ranges                                   | $-23 \leq h \leq 22, -7 \leq k \leq 7, -20 \leq l \leq 21$    |
| Reflections collected                          | 42980                                                         |
| Independent reflections                        | 3948 [ $R_{\text{int}} = 0.0441, R_{\text{sigma}} = 0.0208$ ] |
| Data/restraints/parameters                     | 3948/0/274                                                    |
| Goodness-of-fit on $F^2$                       | 1.043                                                         |
| Final R indexes [ $I \geq 2\sigma(I)$ ]        | $R_1 = 0.0334, wR_2 = 0.0810$                                 |
| Final R indexes [all data]                     | $R_1 = 0.0355, wR_2 = 0.0824$                                 |
| Largest diff. peak/hole / $e \text{ \AA}^{-3}$ | 0.29/-0.23                                                    |

**Table S2.** Fractional Atomic Coordinates ( $\times 10^4$ ) and Equivalent Isotropic Displacement Parameters ( $\text{\AA}^2 \times 10^3$ ) for **6**.  $U_{\text{eq}}$  is defined as 1/3 of the trace of the orthogonalised  $U_{\text{IJ}}$  tensor.

| Atom | $x$       | $y$        | $z$        | $U(\text{eq})$ |
|------|-----------|------------|------------|----------------|
| F1   | 2188.3(4) | 2934.1(11) | 2664.6(4)  | 19.12(16)      |
| F2   | 2591.1(3) | 5954.0(11) | 3166.1(4)  | 17.83(15)      |
| O1   | 1336.3(4) | 5985.2(13) | 3986.8(5)  | 17.25(18)      |
| O2   | 5352.6(5) | -767.9(16) | 3681.7(6)  | 31.3(2)        |
| O3   | 1901.4(4) | -14.4(13)  | 3963.5(5)  | 18.64(18)      |
| N1   | 2133.0(5) | 1903.1(15) | 5139.5(6)  | 16.4(2)        |
| C1   | 4098.9(7) | 2874(2)    | 4330.0(8)  | 22.7(3)        |
| C2   | 4737.7(7) | 1881(2)    | 4224.8(9)  | 28.1(3)        |
| C3   | 4690.8(6) | 117(2)     | 3738.9(7)  | 21.0(3)        |
| C4   | 3995.8(6) | -629.9(19) | 3353.6(7)  | 18.1(2)        |
| C5   | 3358.1(6) | 389.7(18)  | 3460.9(7)  | 17.0(2)        |
| C6   | 3392.8(6) | 2147.0(18) | 3950.5(6)  | 14.8(2)        |
| C7   | 2674.8(6) | 3170.5(17) | 4096.0(6)  | 14.2(2)        |
| C8   | 2811.8(6) | 4644.7(18) | 4817.3(6)  | 14.8(2)        |
| C9   | 3172.0(6) | 6541.6(19) | 4954.1(7)  | 16.9(2)        |
| C10  | 3214.6(6) | 7549.6(19) | 5696.5(7)  | 19.5(2)        |
| C11  | 2893.3(7) | 6659(2)    | 6282.9(7)  | 21.3(3)        |
| C12  | 2523.0(7) | 4756(2)    | 6151.4(7)  | 19.7(2)        |
| C13  | 2490.6(6) | 3786.0(18) | 5416.1(7)  | 15.8(2)        |
| C14  | 2188.8(6) | 1465.8(18) | 4372.4(6)  | 14.7(2)        |
| C15  | 5327.8(8) | -2645(2)   | 3228.1(10) | 37.2(4)        |
| C16  | 1681.4(7) | 705(2)     | 5580.5(7)  | 22.1(3)        |



|     |           |            |           |         |
|-----|-----------|------------|-----------|---------|
| C17 | 2209.5(6) | 4216.2(17) | 3318.4(6) | 14.5(2) |
| C18 | 1394.1(6) | 4754.0(18) | 3312.5(6) | 15.0(2) |
| C19 | 982.8(6)  | 5643.8(18) | 2502.2(7) | 16.0(2) |
| C20 | 434.0(6)  | 4435(2)    | 2009.0(7) | 19.0(2) |
| C21 | 24.8(6)   | 5213(2)    | 1276.6(7) | 22.9(3) |
| C22 | 161.4(7)  | 7207(2)    | 1032.2(7) | 24.1(3) |
| C23 | 707.7(7)  | 8424(2)    | 1518.7(7) | 22.5(3) |
| C24 | 1117.5(6) | 7652.7(19) | 2250.9(7) | 18.5(2) |

**Table S3.** Anisotropic Displacement Parameters ( $\text{\AA}^2 \times 10^3$ ) for **6** The Anisotropic displacement factor exponent takes the form:  $-2\pi^2[h^2a^{*2}U_{11}+2hka^*b^*U_{12}+\dots]$ .

| Atom | U <sub>11</sub> | U <sub>22</sub> | U <sub>33</sub> | U <sub>23</sub> | U <sub>13</sub> | U <sub>12</sub> |
|------|-----------------|-----------------|-----------------|-----------------|-----------------|-----------------|
| F1   | 22.2(3)         | 21.4(4)         | 12.8(3)         | -3.9(3)         | 2.0(2)          | 4.2(3)          |
| F2   | 16.9(3)         | 17.8(4)         | 19.3(3)         | 4.0(3)          | 5.2(2)          | -2.6(3)         |
| O1   | 19.4(4)         | 16.3(4)         | 17.2(4)         | -2.3(3)         | 6.5(3)          | -1.3(3)         |
| O2   | 16.7(4)         | 30.1(5)         | 47.6(6)         | -17.6(4)        | 8.1(4)          | 1.1(4)          |
| O3   | 18.4(4)         | 16.0(4)         | 20.9(4)         | -1.3(3)         | 3.2(3)          | -3.2(3)         |
| N1   | 17.5(5)         | 16.6(5)         | 16.0(4)         | 1.8(4)          | 5.6(4)          | -0.4(4)         |
| C1   | 18.7(6)         | 21.6(6)         | 27.5(6)         | -10.0(5)        | 4.4(5)          | -1.6(5)         |
| C2   | 14.8(6)         | 29.6(7)         | 38.7(7)         | -14.3(6)        | 3.3(5)          | -2.6(5)         |
| C3   | 17.1(6)         | 20.8(6)         | 26.2(6)         | -2.7(5)         | 7.2(5)          | 1.5(5)          |
| C4   | 20.0(6)         | 15.6(6)         | 18.6(5)         | -2.2(4)         | 4.3(4)          | 0.1(4)          |
| C5   | 16.3(5)         | 16.4(6)         | 17.5(5)         | -1.0(4)         | 2.0(4)          | -1.6(4)         |
| C6   | 15.9(5)         | 15.0(6)         | 14.0(5)         | 1.3(4)          | 4.2(4)          | -0.1(4)         |
| C7   | 14.4(5)         | 13.7(6)         | 14.3(5)         | -0.4(4)         | 3.0(4)          | -0.7(4)         |
| C8   | 13.4(5)         | 17.3(6)         | 13.4(5)         | -0.2(4)         | 2.1(4)          | 2.2(4)          |
| C9   | 14.5(5)         | 18.5(6)         | 17.3(5)         | -1.0(4)         | 2.6(4)          | 0.2(4)          |
| C10  | 16.7(5)         | 17.6(6)         | 21.8(6)         | -4.1(5)         | -0.6(4)         | 0.9(4)          |
| C11  | 22.5(6)         | 25.2(7)         | 14.5(5)         | -4.4(5)         | 0.2(4)          | 6.0(5)          |
| C12  | 22.3(6)         | 23.1(6)         | 14.1(5)         | 2.0(4)          | 4.8(4)          | 5.2(5)          |
| C13  | 14.4(5)         | 16.7(6)         | 15.8(5)         | 1.9(4)          | 2.0(4)          | 2.4(4)          |
| C14  | 12.6(5)         | 14.5(6)         | 16.5(5)         | 2.3(4)          | 2.4(4)          | 2.1(4)          |
| C15  | 24.5(7)         | 31.4(8)         | 56.2(9)         | -19.9(7)        | 10.0(6)         | 4.4(6)          |
| C16  | 21.8(6)         | 23.9(7)         | 23.0(6)         | 5.5(5)          | 10.0(5)         | -1.4(5)         |
| C17  | 17.2(5)         | 13.1(5)         | 13.7(5)         | -1.9(4)         | 4.5(4)          | -2.4(4)         |
| C18  | 15.2(5)         | 14.1(6)         | 15.8(5)         | -1.0(4)         | 3.8(4)          | -1.3(4)         |
| C19  | 13.5(5)         | 18.4(6)         | 16.4(5)         | -1.4(4)         | 4.2(4)          | 1.7(4)          |
| C20  | 15.3(5)         | 20.4(6)         | 21.7(6)         | -2.3(5)         | 5.1(4)          | -0.8(4)         |
| C21  | 14.7(5)         | 31.7(7)         | 20.9(6)         | -4.9(5)         | 0.9(4)          | -0.8(5)         |
| C22  | 18.5(6)         | 34.6(7)         | 18.3(5)         | 2.3(5)          | 2.2(4)          | 6.3(5)          |

|     |         |         |         |         |        |         |
|-----|---------|---------|---------|---------|--------|---------|
| C23 | 22.3(6) | 22.6(7) | 23.0(6) | 4.3(5)  | 6.1(5) | 3.3(5)  |
| C24 | 17.5(5) | 18.7(6) | 18.8(5) | -0.6(4) | 3.1(4) | -0.8(4) |

**Table S4.** Bond Lengths for **6**.

| Atom | Atom | Length/Å   | Atom | Atom | Length/Å   |
|------|------|------------|------|------|------------|
| F1   | C17  | 1.3725(12) | C7   | C14  | 1.5504(15) |
| F2   | C17  | 1.3727(13) | C7   | C17  | 1.5535(15) |
| O1   | C18  | 1.4116(13) | C8   | C9   | 1.3805(16) |
| O2   | C3   | 1.3677(14) | C8   | C13  | 1.3963(15) |
| O2   | C15  | 1.4233(16) | C9   | C10  | 1.4000(16) |
| O3   | C14  | 1.2236(14) | C10  | C11  | 1.3877(17) |
| N1   | C13  | 1.4050(15) | C11  | C12  | 1.3916(18) |
| N1   | C14  | 1.3549(14) | C12  | C13  | 1.3811(16) |
| N1   | C16  | 1.4552(14) | C17  | C18  | 1.5392(15) |
| C1   | C2   | 1.3842(17) | C18  | C19  | 1.5222(15) |
| C1   | C6   | 1.3960(16) | C19  | C20  | 1.3940(16) |
| C2   | C3   | 1.3902(18) | C19  | C24  | 1.3966(17) |
| C3   | C4   | 1.3859(17) | C20  | C21  | 1.3916(17) |
| C4   | C5   | 1.3916(16) | C21  | C22  | 1.3843(19) |
| C5   | C6   | 1.3922(16) | C22  | C23  | 1.3895(18) |
| C6   | C7   | 1.5449(15) | C23  | C24  | 1.3902(16) |
| C7   | C8   | 1.5203(15) |      |      |            |

**Table S5.** Bond Angles for **6**.

| Atom | Atom | Atom | Angle/°    | Atom | Atom | Atom | Angle/°    |
|------|------|------|------------|------|------|------|------------|
| C3   | O2   | C15  | 117.89(10) | C10  | C11  | C12  | 121.27(11) |
| C13  | N1   | C16  | 124.21(10) | C13  | C12  | C11  | 117.39(11) |
| C14  | N1   | C13  | 111.52(9)  | C8   | C13  | N1   | 109.91(10) |
| C14  | N1   | C16  | 123.86(10) | C12  | C13  | N1   | 127.60(10) |
| C2   | C1   | C6   | 121.23(11) | C12  | C13  | C8   | 122.47(11) |
| C1   | C2   | C3   | 120.58(11) | O3   | C14  | N1   | 125.94(10) |
| O2   | C3   | C2   | 116.19(11) | O3   | C14  | C7   | 125.64(10) |
| O2   | C3   | C4   | 124.58(11) | N1   | C14  | C7   | 108.42(9)  |
| C4   | C3   | C2   | 119.24(11) | F1   | C17  | F2   | 104.99(8)  |
| C3   | C4   | C5   | 119.61(11) | F1   | C17  | C7   | 109.61(9)  |
| C4   | C5   | C6   | 122.05(10) | F1   | C17  | C18  | 106.11(8)  |
| C1   | C6   | C7   | 121.84(10) | F2   | C17  | C7   | 107.53(8)  |
| C5   | C6   | C1   | 117.29(10) | F2   | C17  | C18  | 110.90(9)  |

|     |     |     |            |     |     |     |            |
|-----|-----|-----|------------|-----|-----|-----|------------|
| C5  | C6  | C7  | 120.81(10) | C18 | C17 | C7  | 117.06(9)  |
| C6  | C7  | C14 | 108.73(9)  | O1  | C18 | C17 | 111.73(9)  |
| C6  | C7  | C17 | 112.22(9)  | O1  | C18 | C19 | 114.00(9)  |
| C8  | C7  | C6  | 113.47(9)  | C19 | C18 | C17 | 112.22(9)  |
| C8  | C7  | C14 | 101.52(8)  | C20 | C19 | C18 | 118.65(10) |
| C8  | C7  | C17 | 111.91(9)  | C20 | C19 | C24 | 119.03(10) |
| C14 | C7  | C17 | 108.29(8)  | C24 | C19 | C18 | 122.28(10) |
| C9  | C8  | C7  | 132.08(10) | C21 | C20 | C19 | 120.66(12) |
| C9  | C8  | C13 | 119.46(10) | C22 | C21 | C20 | 119.95(11) |
| C13 | C8  | C7  | 108.46(10) | C21 | C22 | C23 | 119.87(11) |
| C8  | C9  | C10 | 119.08(11) | C22 | C23 | C24 | 120.35(12) |
| C11 | C10 | C9  | 120.32(11) | C23 | C24 | C19 | 120.14(11) |

**Table S6.** Hydrogen Atom Coordinates ( $\text{\AA}\times 10^4$ ) and Isotropic Displacement Parameters ( $\text{\AA}^2\times 10^3$ ) for **6**.

| Atom | <i>x</i> | <i>y</i> | <i>z</i> | U(eq) |
|------|----------|----------|----------|-------|
| H1   | 1515.45  | 7139.97  | 3946.38  | 26    |
| H1A  | 4141.02  | 4047.89  | 4659.57  | 27    |
| H2   | 5202.23  | 2397.88  | 4481.44  | 34    |
| H4   | 3955.88  | -1805.69 | 3025.3   | 22    |
| H5   | 2894.3   | -118.47  | 3197.25  | 20    |
| H9   | 3383.47  | 7141.56  | 4558.52  | 20    |
| H10  | 3459.46  | 8822.57  | 5797.15  | 23    |
| H11  | 2926.08  | 7346.14  | 6773.23  | 26    |
| H12  | 2305.9   | 4160.87  | 6543.43  | 24    |
| H15A | 5078.01  | -2391.34 | 2675.22  | 56    |
| H15B | 5062.66  | -3691.69 | 3455.32  | 56    |
| H15C | 5825.96  | -3117.33 | 3247.76  | 56    |
| H16A | 1959.85  | 460.14   | 6123.37  | 33    |
| H16B | 1549.46  | -604.75  | 5312.73  | 33    |
| H16C | 1237.06  | 1470.49  | 5596.41  | 33    |
| H18  | 1149.61  | 3427.63  | 3376.51  | 18    |
| H20  | 340.38   | 3094.89  | 2170.9   | 23    |
| H21  | -340.14  | 4394.7   | 951.66   | 28    |
| H22  | -112     | 7729.96  | 543.35   | 29    |
| H23  | 799.76   | 9762.63  | 1353.7   | 27    |
| H24  | 1482.11  | 8476.03  | 2573.96  | 22    |

## 6. $^1\text{H}$ , $^{13}\text{C}$ and $^{19}\text{F}$ NMR spectra and HPLC spectra

### $^1\text{H}$ NMR of Compound 3a (400 MHz, $\text{CDCl}_3$ )

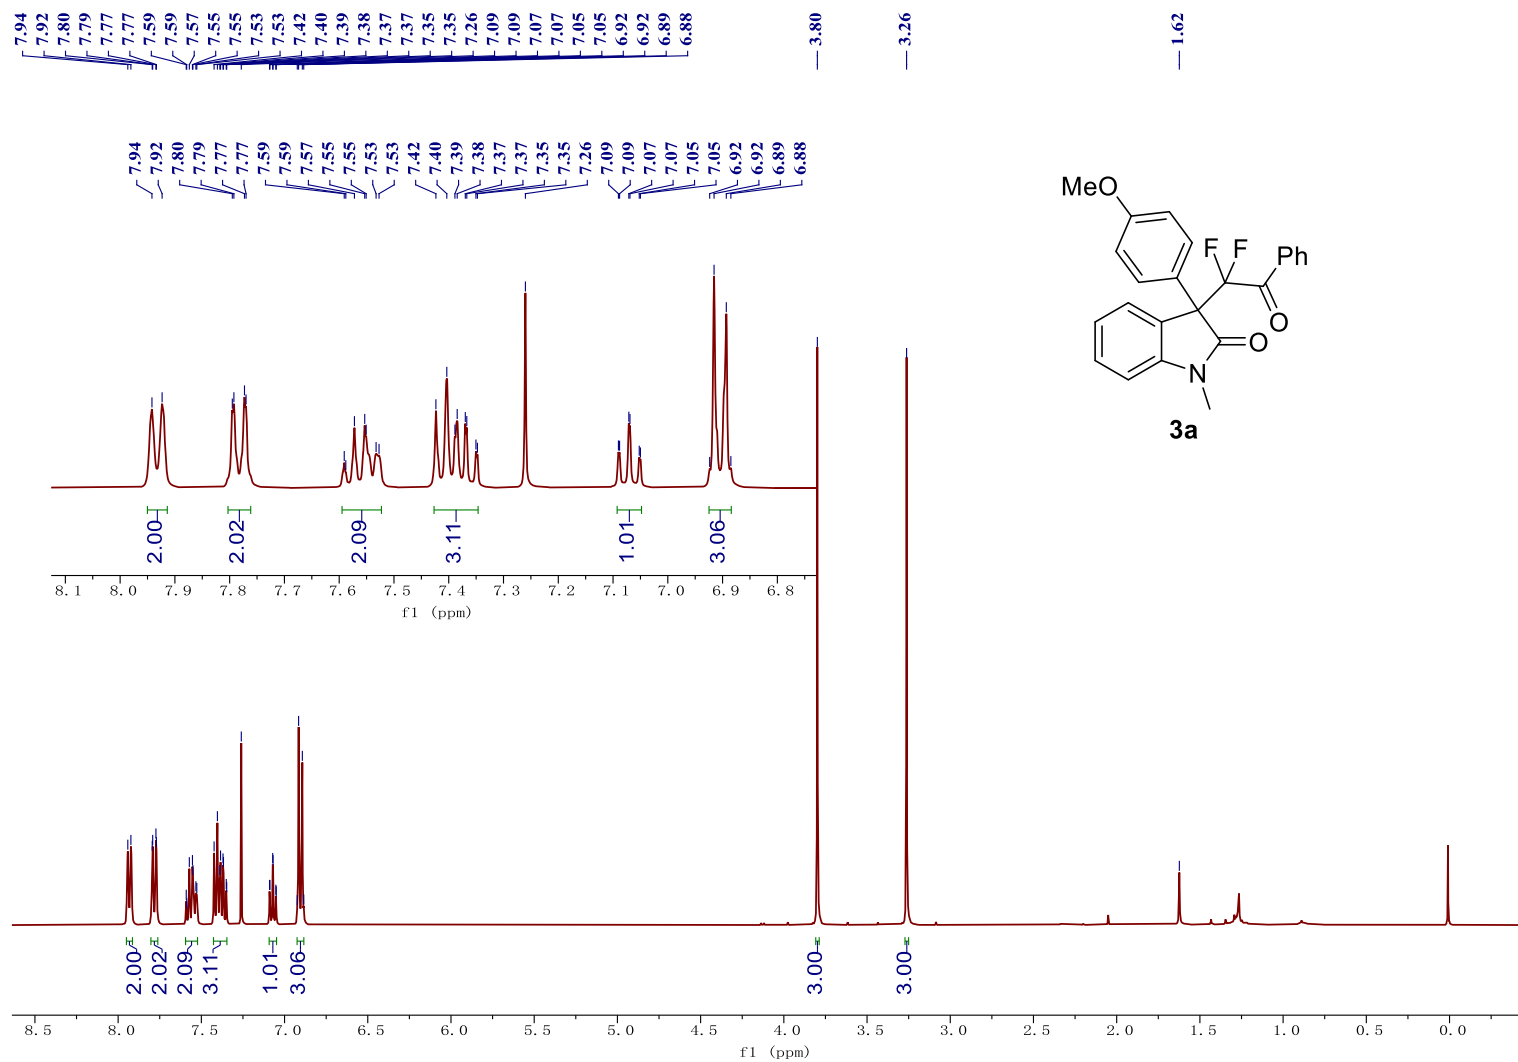

**$^{13}\text{C}$  NMR of Compound 3a (100 MHz,  $\text{CDCl}_3$ )**

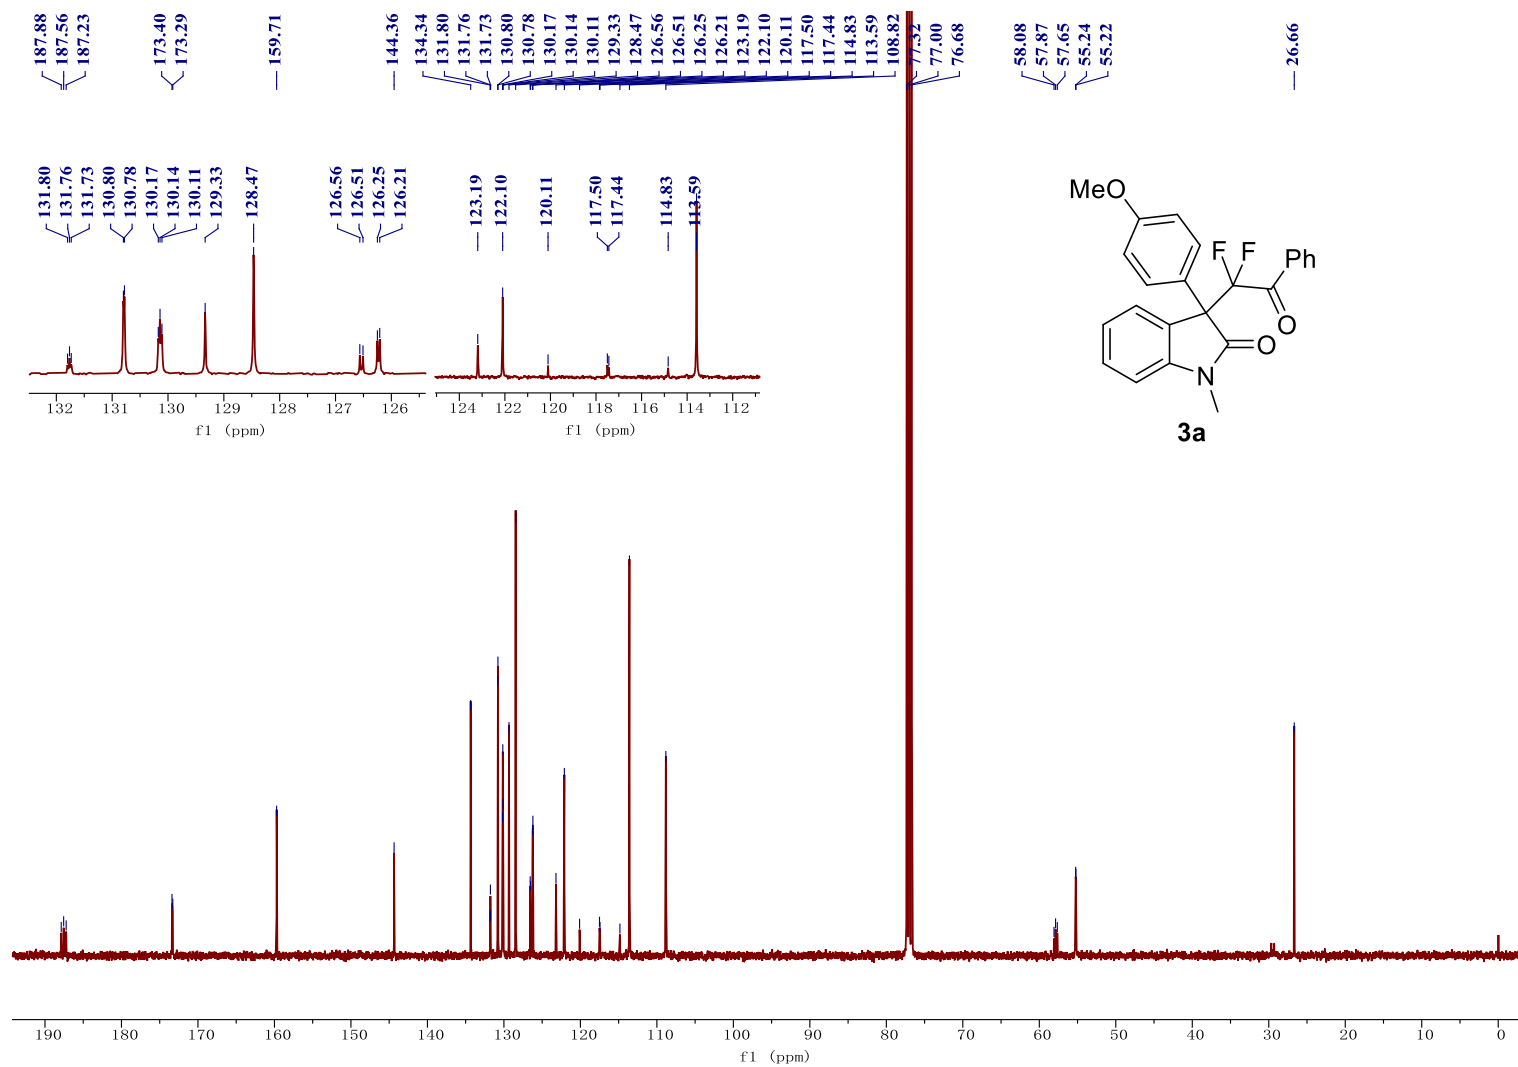

**$^{19}\text{F}$  NMR of Compound 3a (376 MHz,  $\text{CDCl}_3$ )**

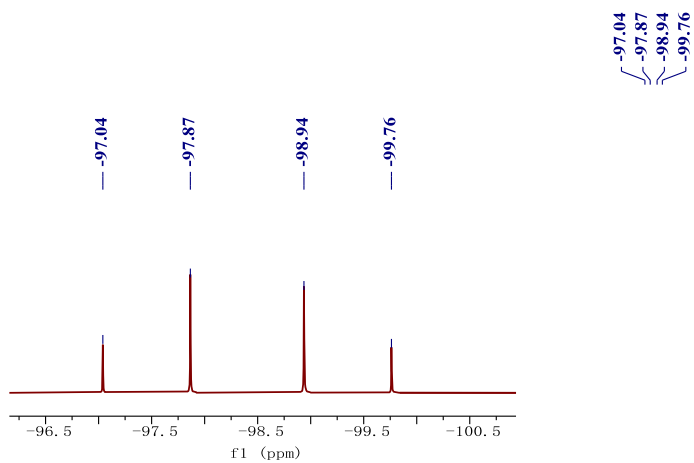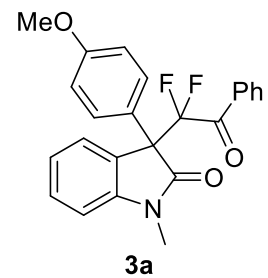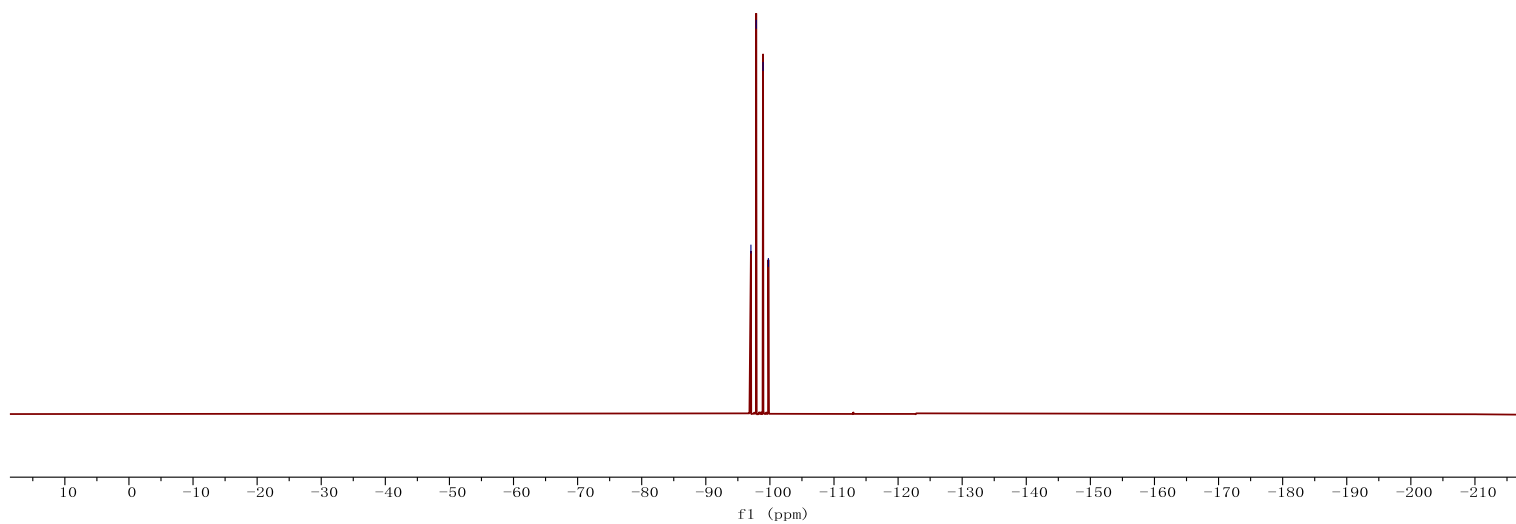

**$^1\text{H}$  NMR of Compound 3b (400 MHz,  $\text{CDCl}_3$ )**

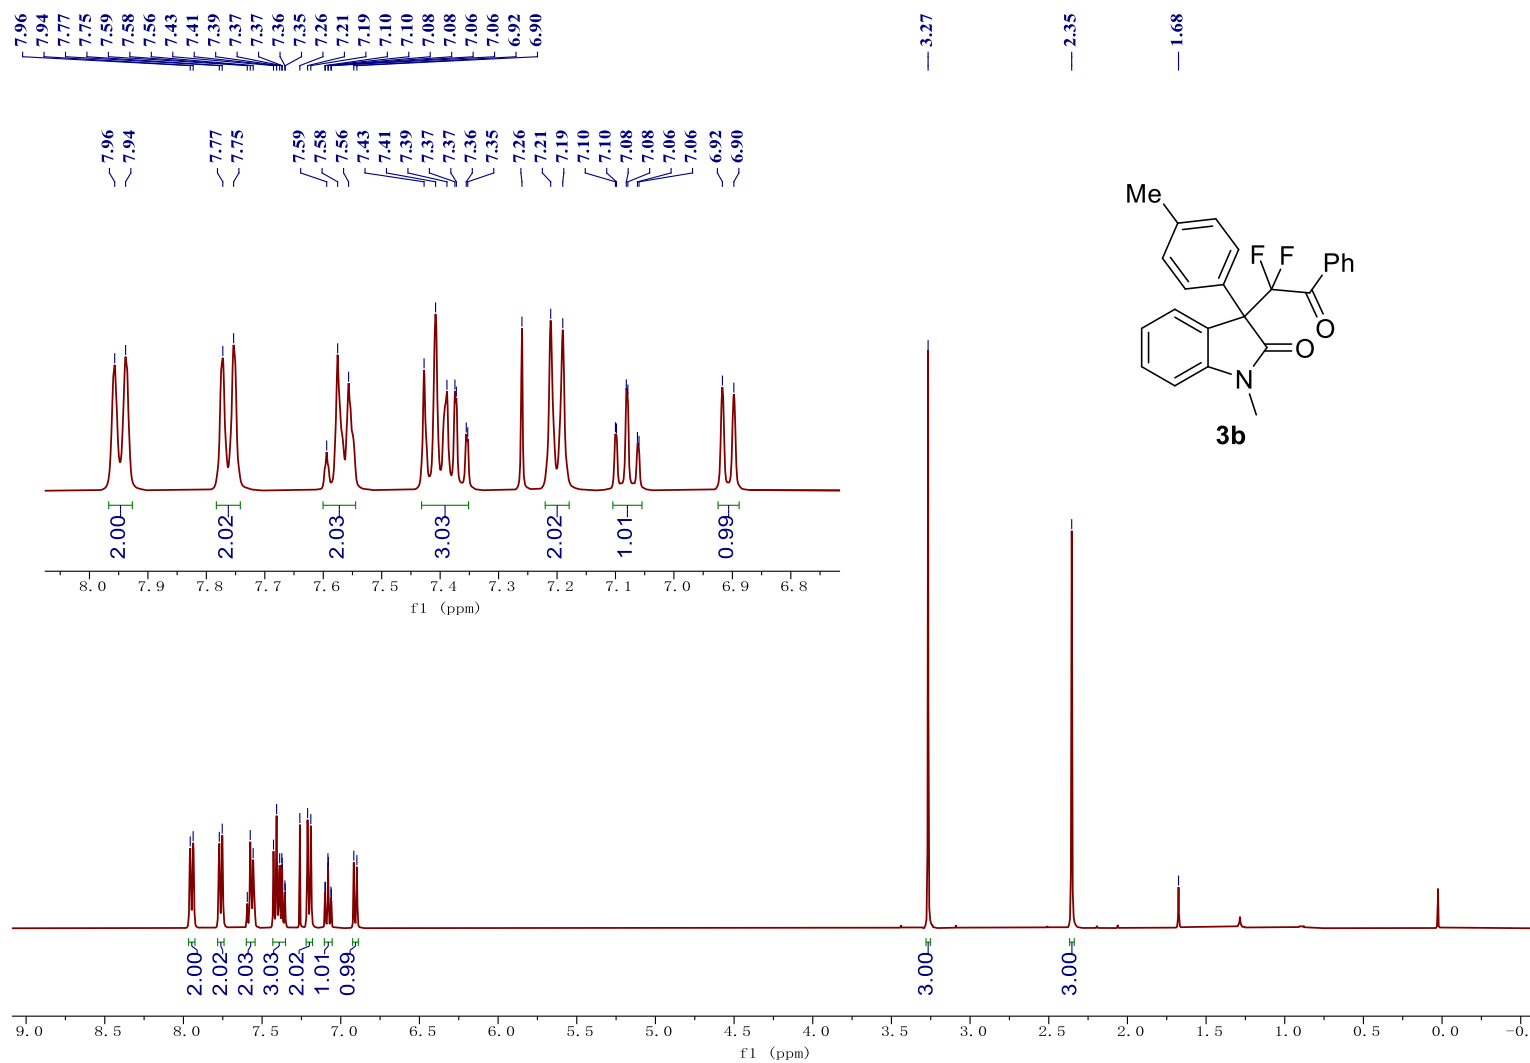

**$^{13}\text{C}$  NMR of Compound 3b (100 MHz,  $\text{CDCl}_3$ )**

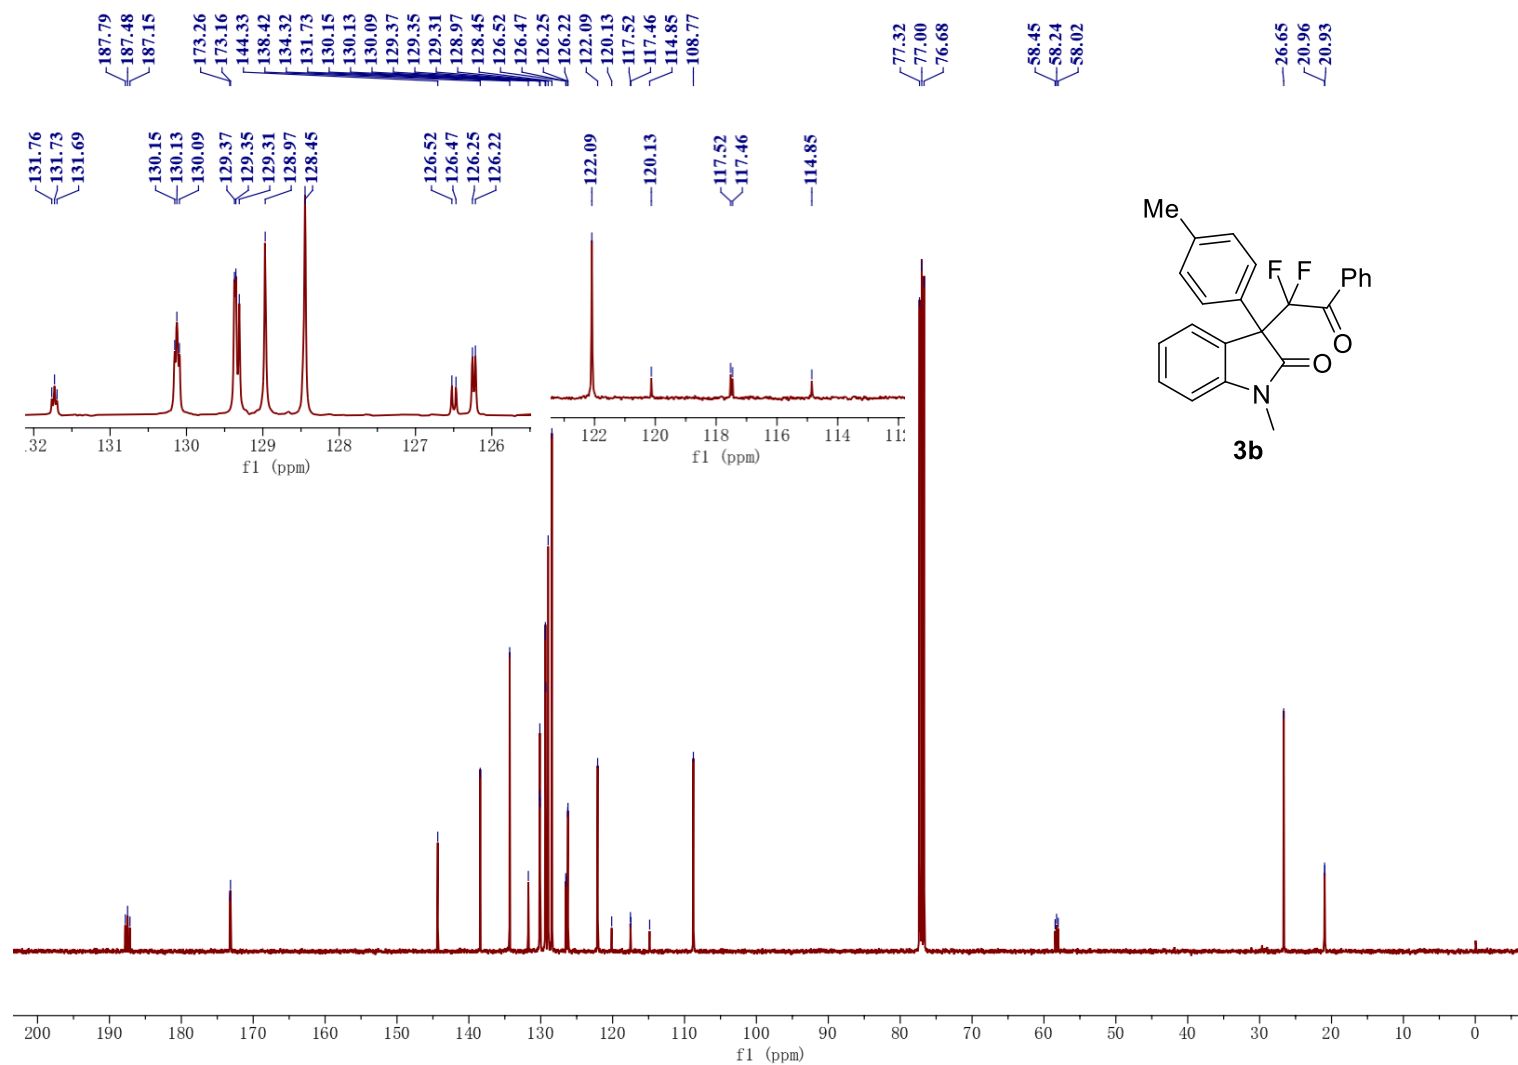



**$^{19}\text{F}$  NMR of Compound 3b (376 MHz,  $\text{CDCl}_3$ )**

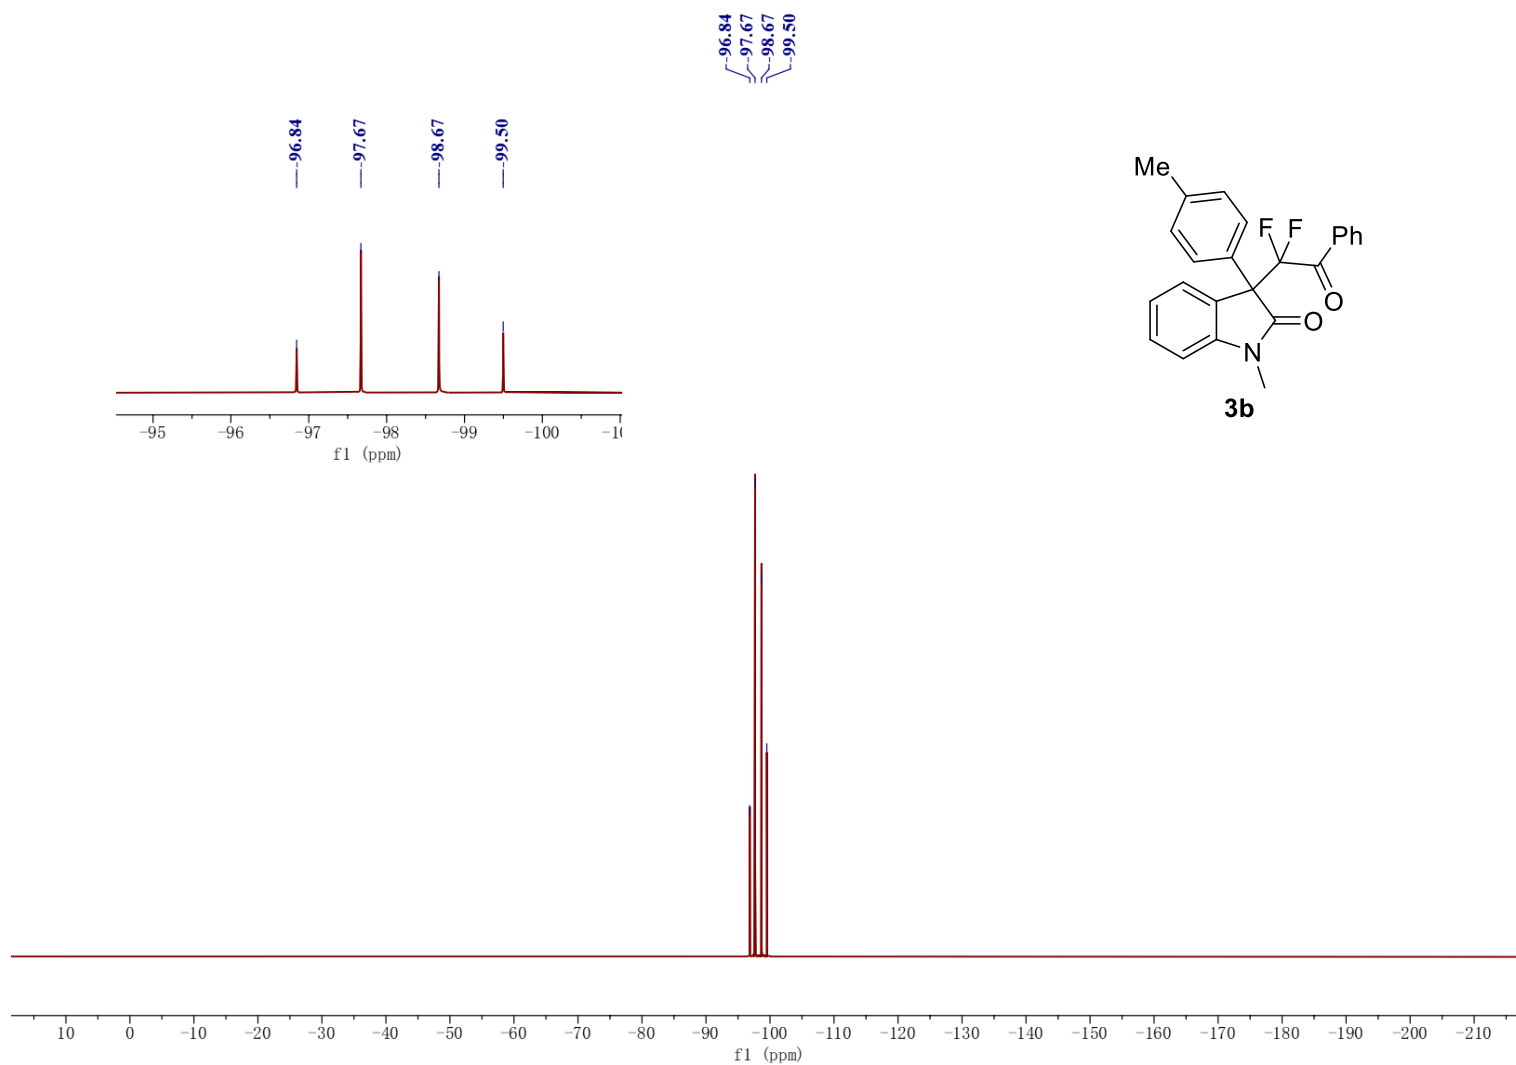

**<sup>1</sup>H NMR of Compound 3c (400 MHz, CDCl<sub>3</sub>)**

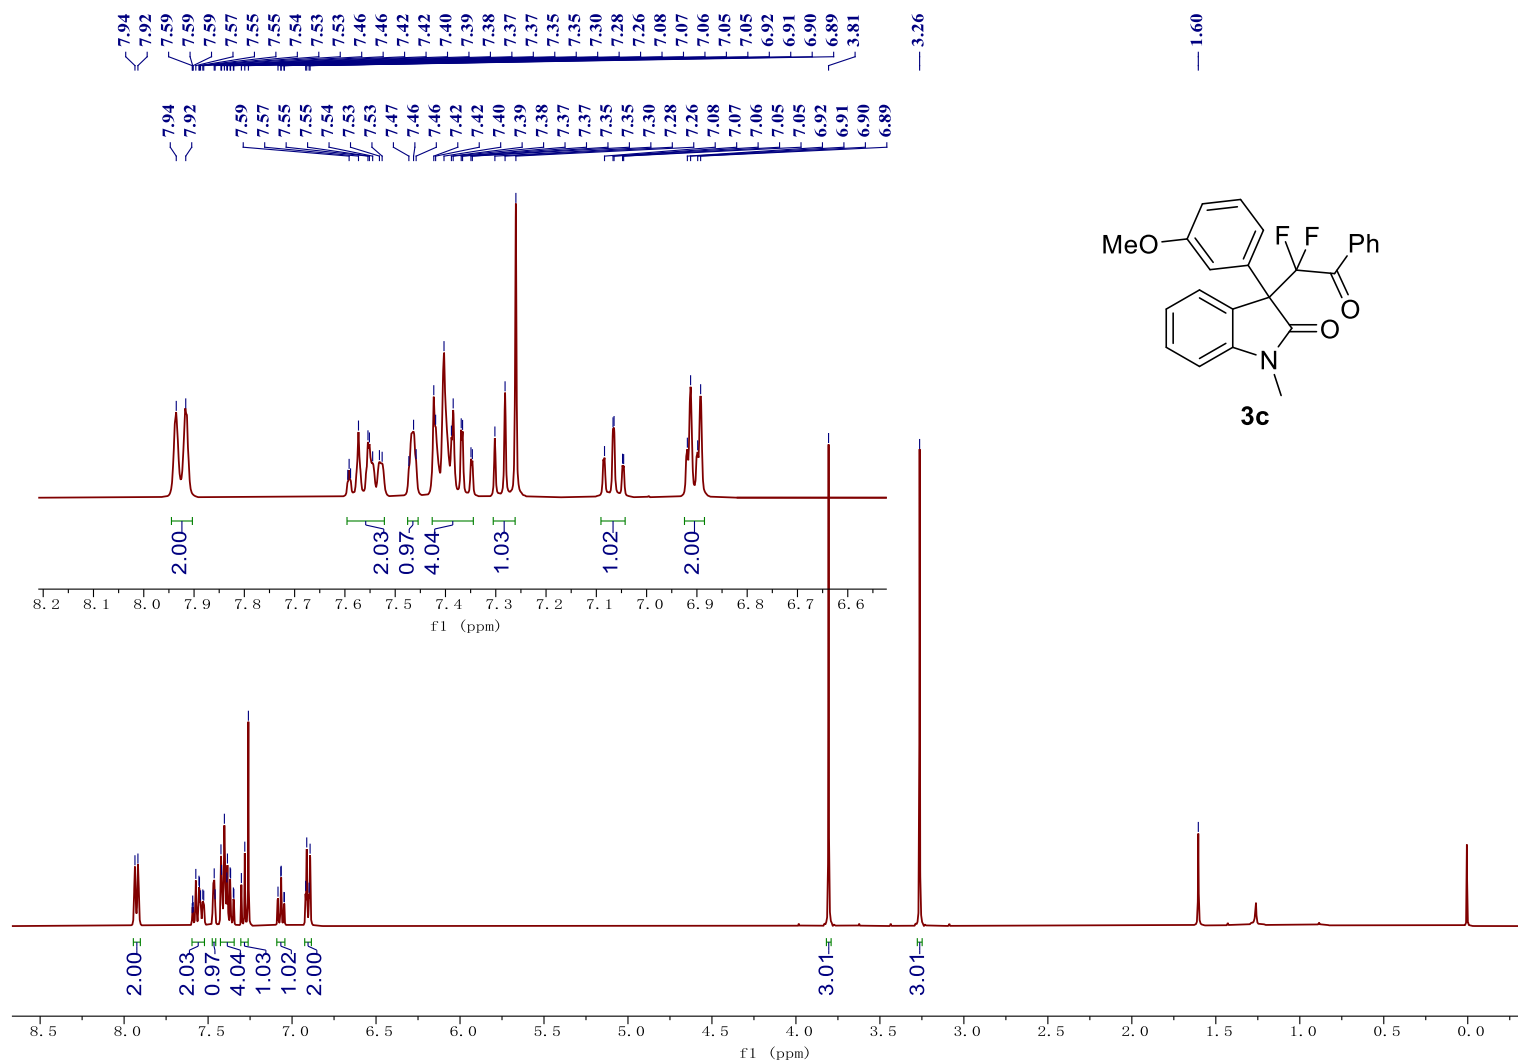

**$^{13}\text{C}$  NMR of Compound 3c (100 MHz,  $\text{CDCl}_3$ )**

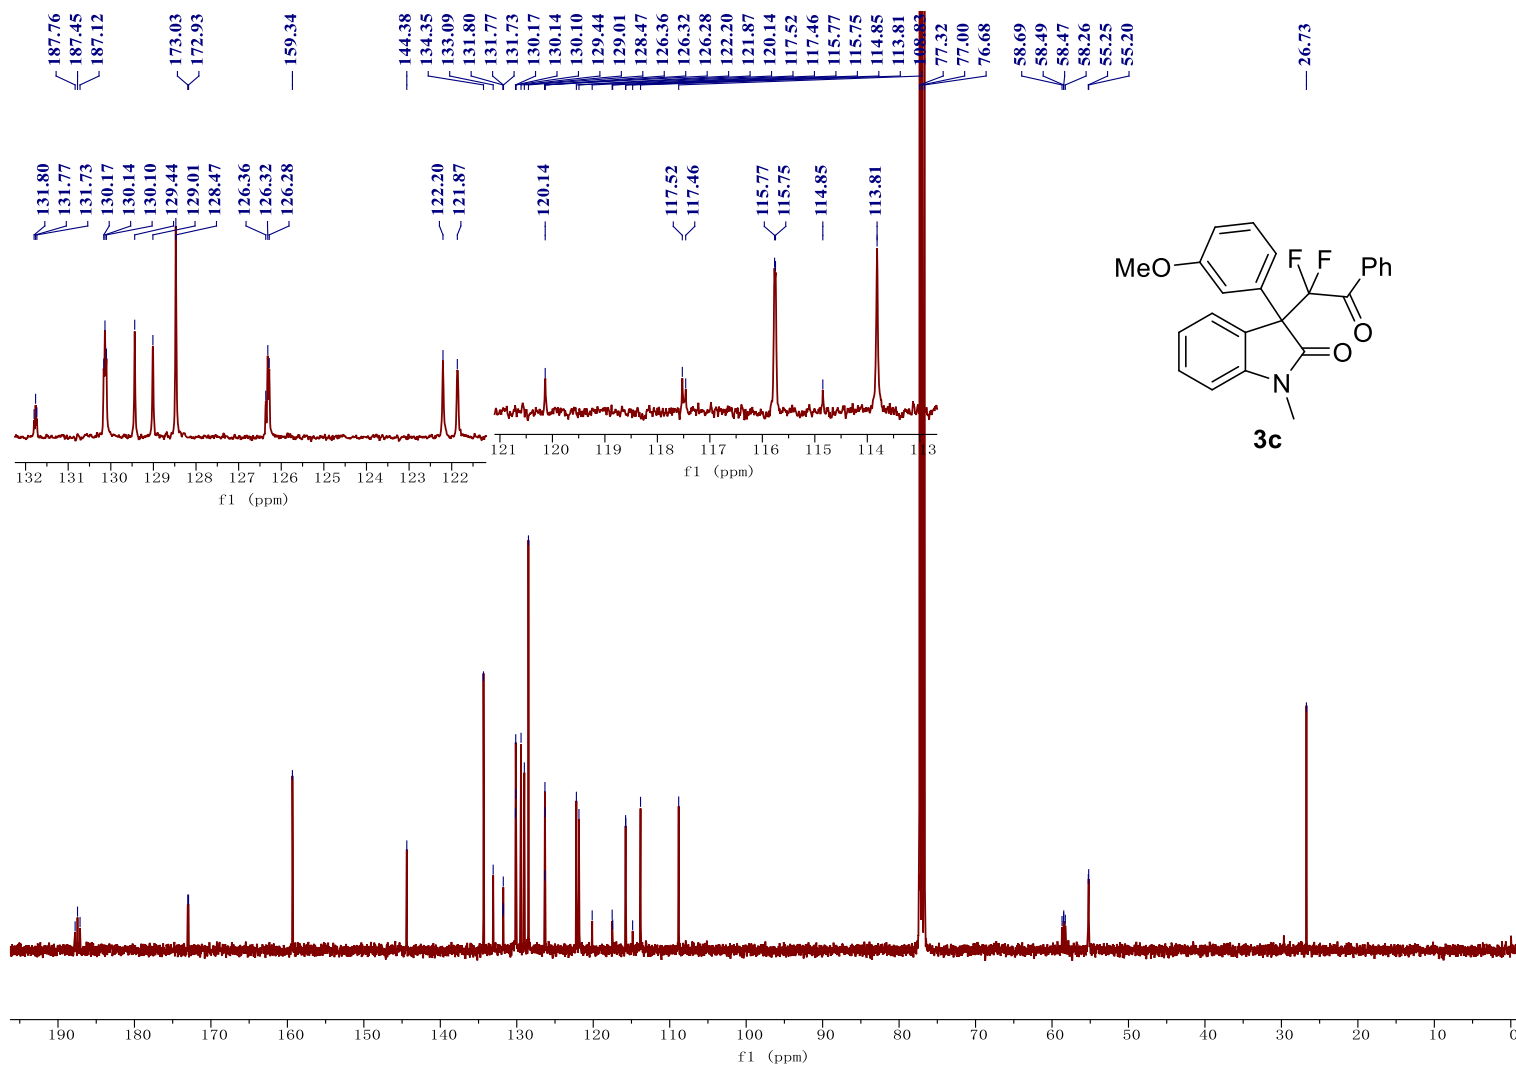

**$^{19}\text{F}$  NMR of Compound 3c (376 MHz,  $\text{CDCl}_3$ )**

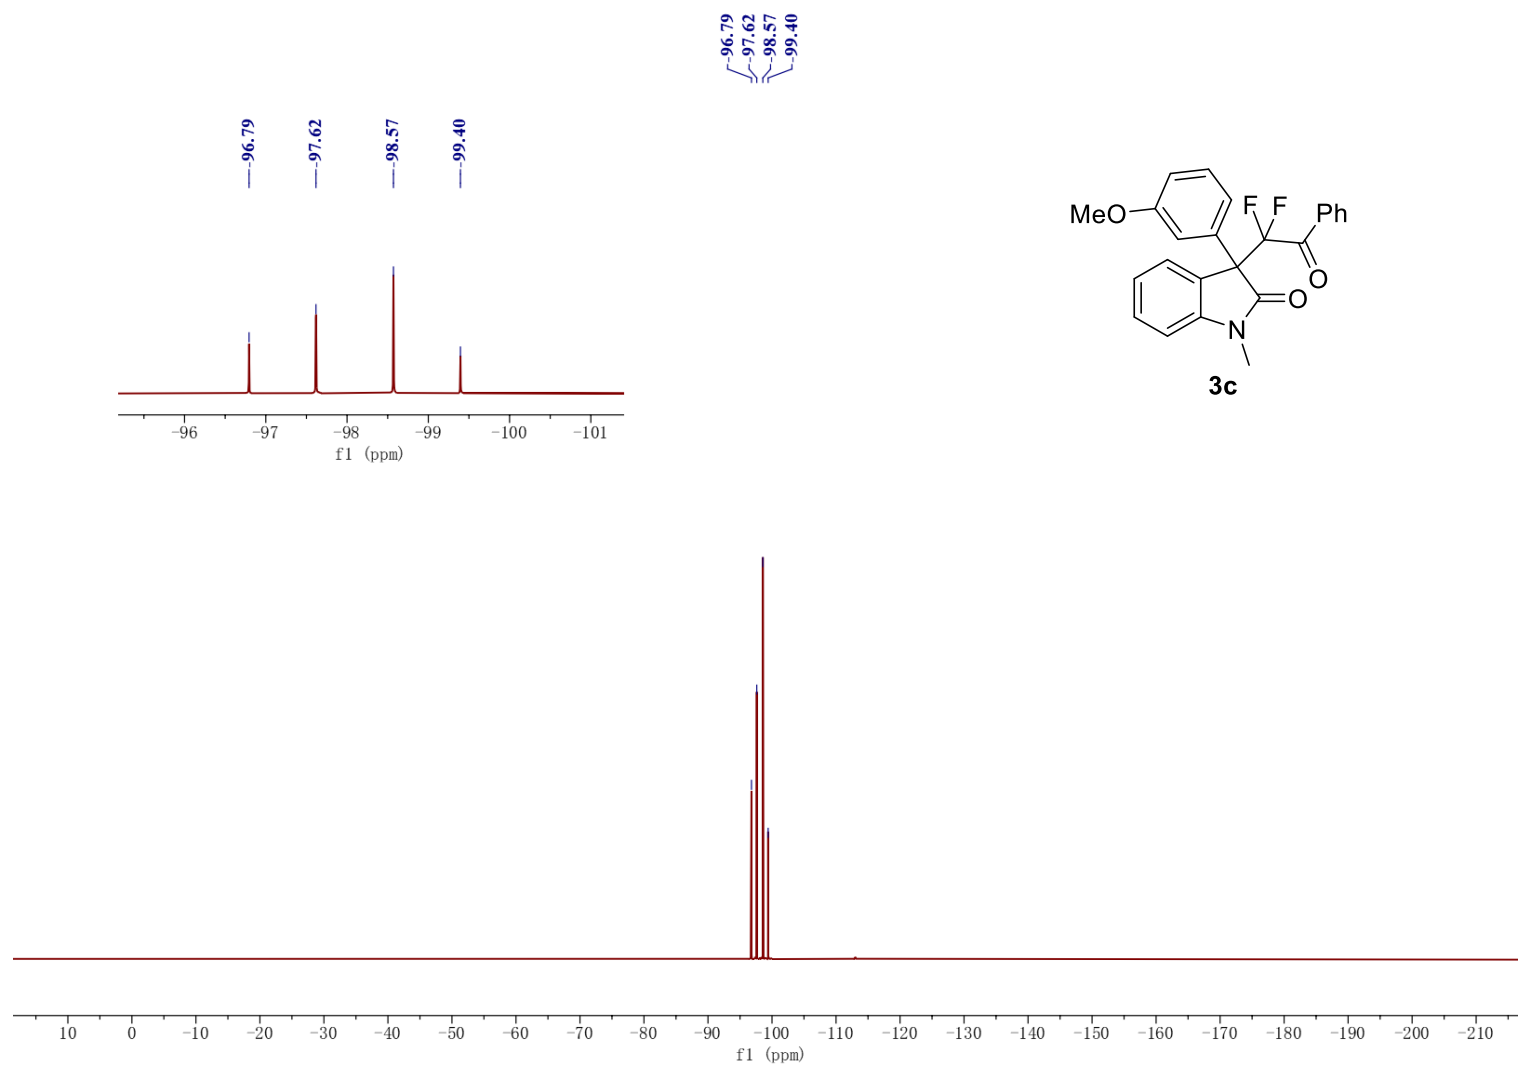

**$^1\text{H}$  NMR of Compound 3d (400 MHz,  $\text{CDCl}_3$ )**

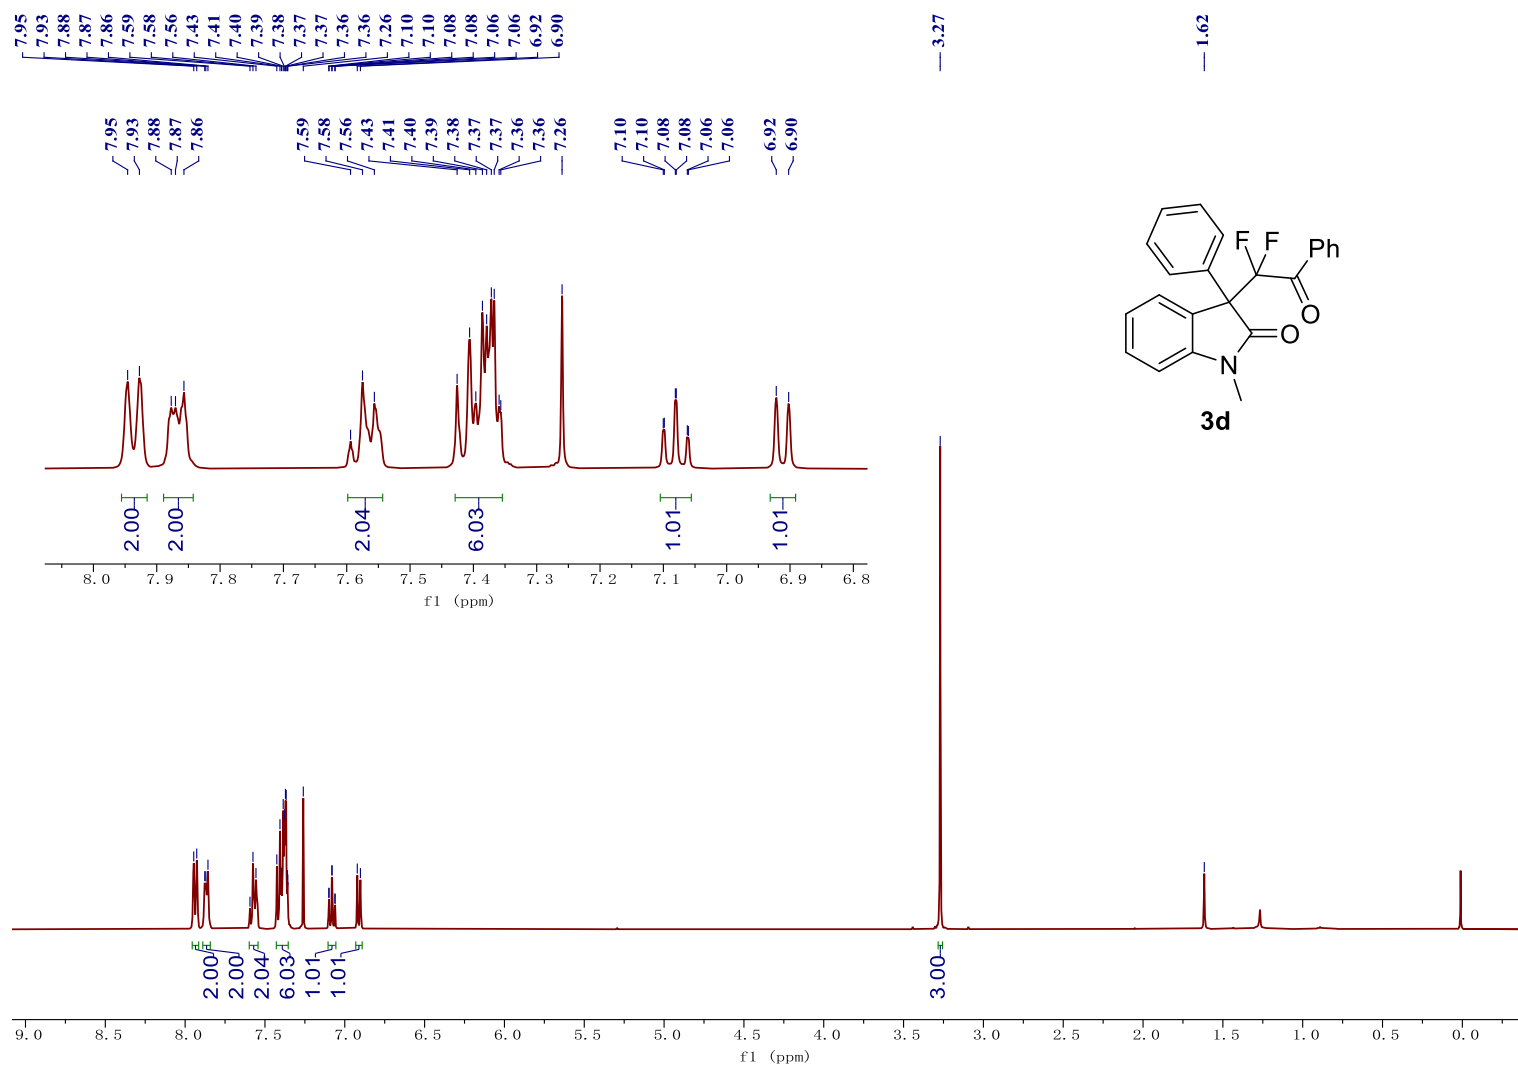

**$^{13}\text{C}$  NMR of Compound 3d (100 MHz,  $\text{CDCl}_3$ )**

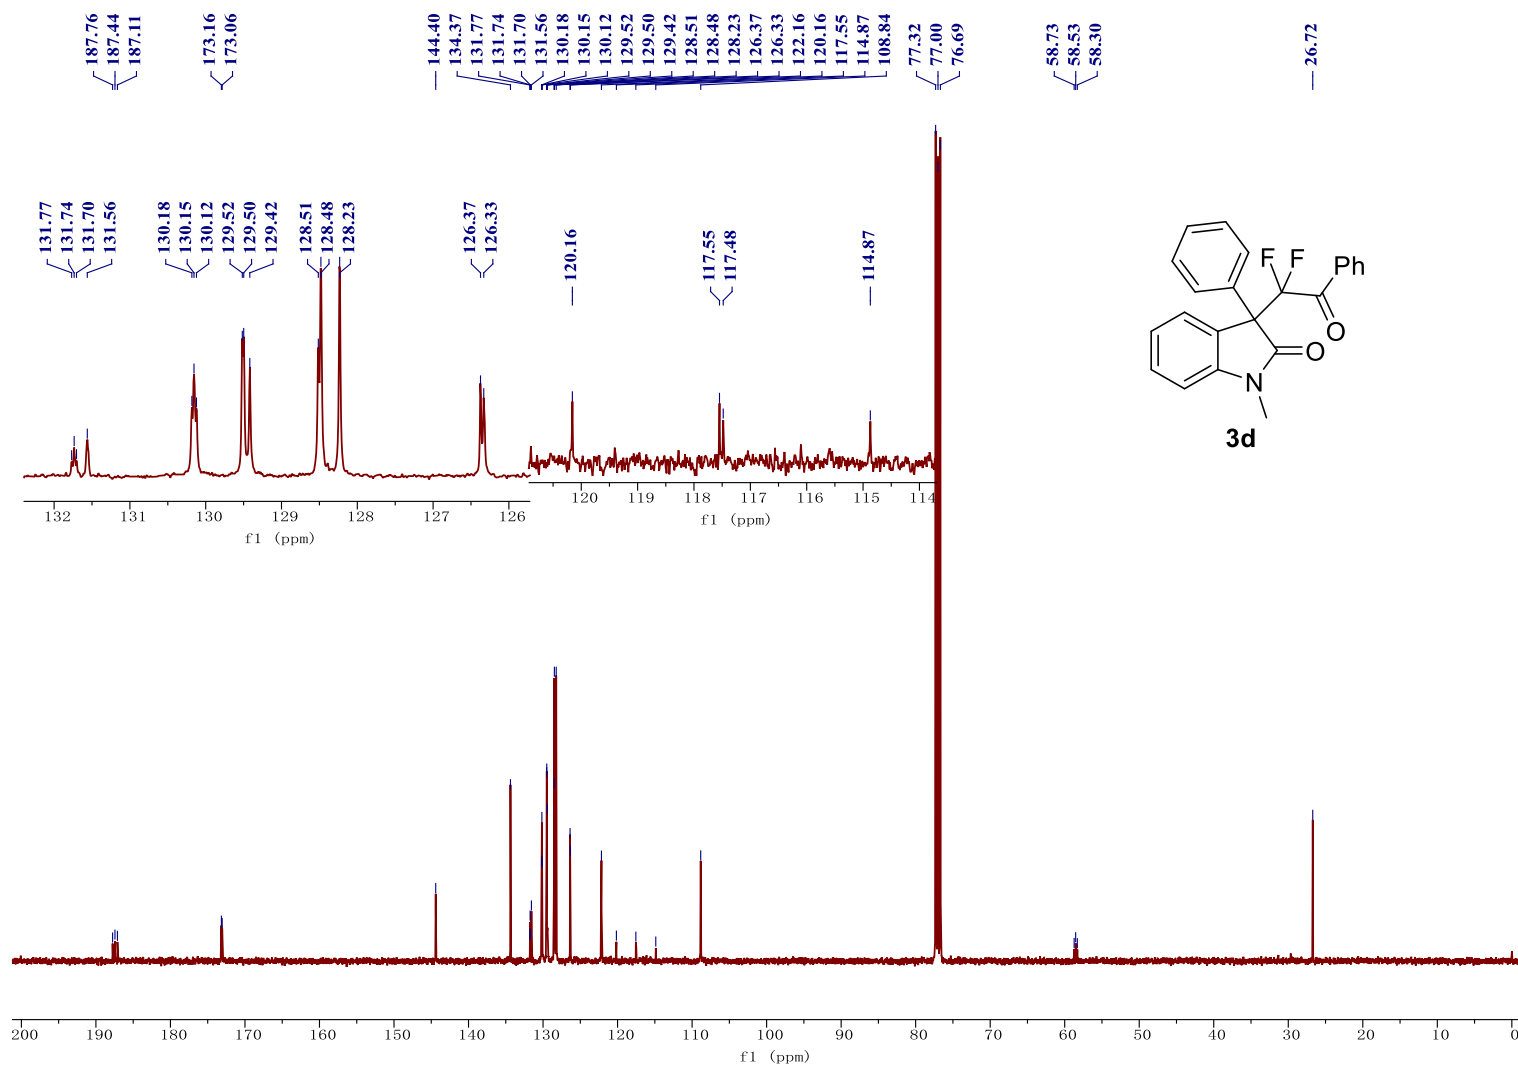

**$^{19}\text{F}$  NMR of Compound 3d (376 MHz,  $\text{CDCl}_3$ )**

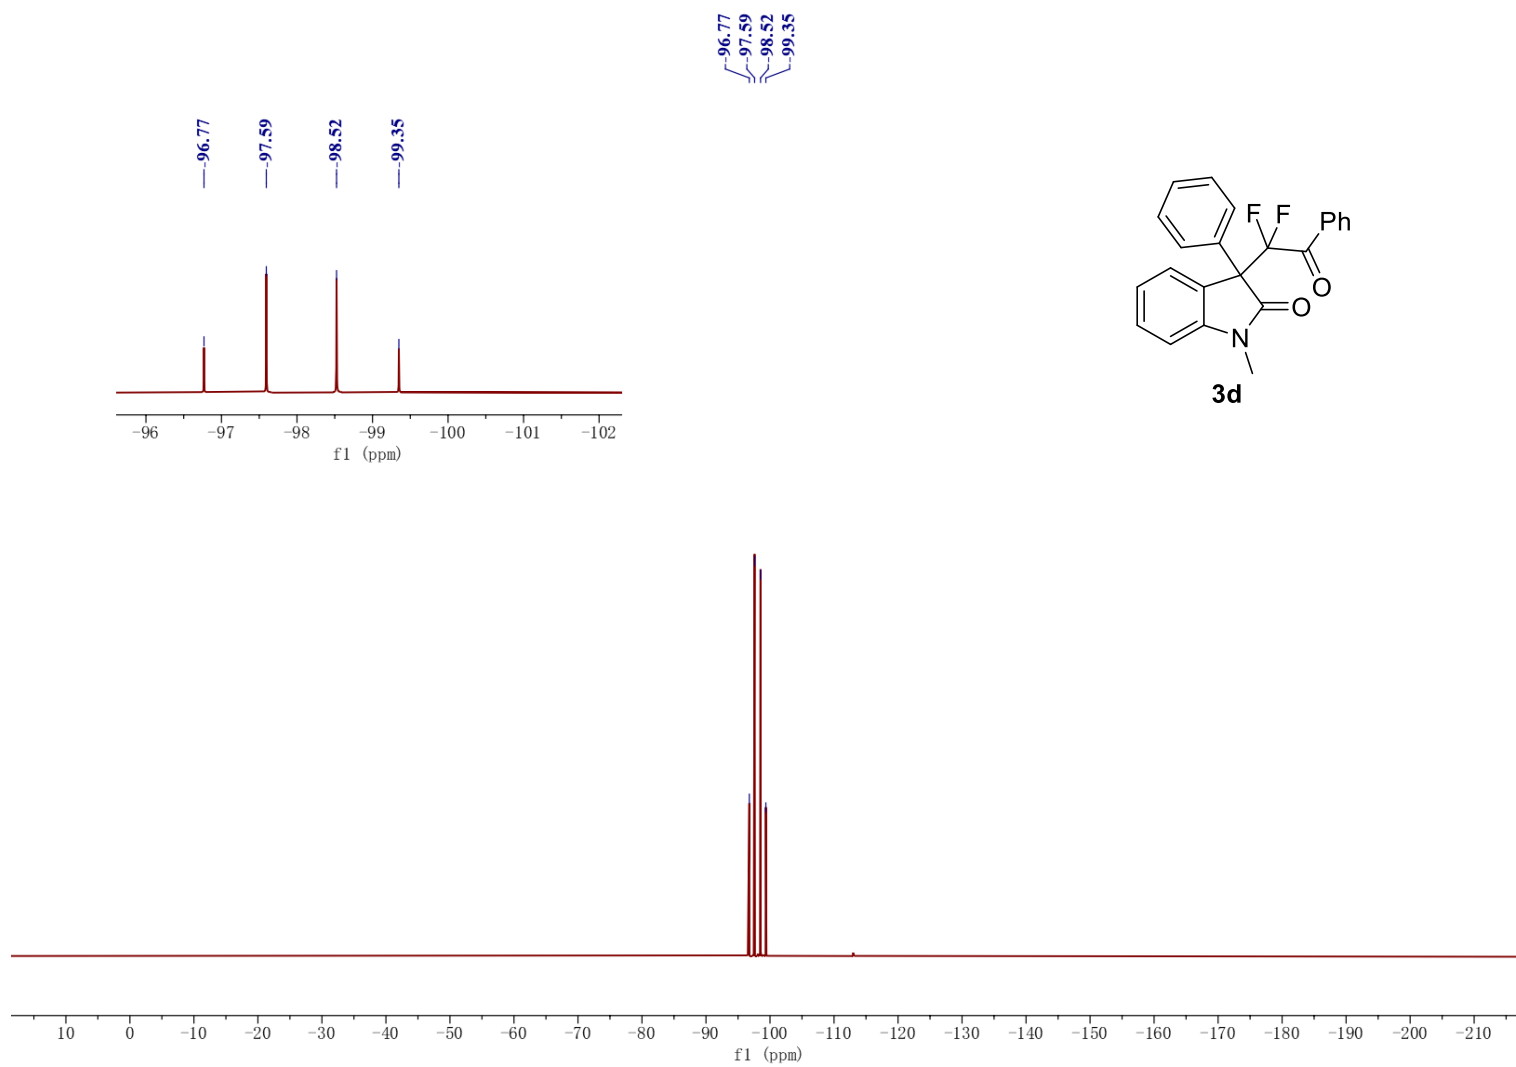

**$^1\text{H}$  NMR of Compound 3e (400 MHz,  $\text{CDCl}_3$ )**

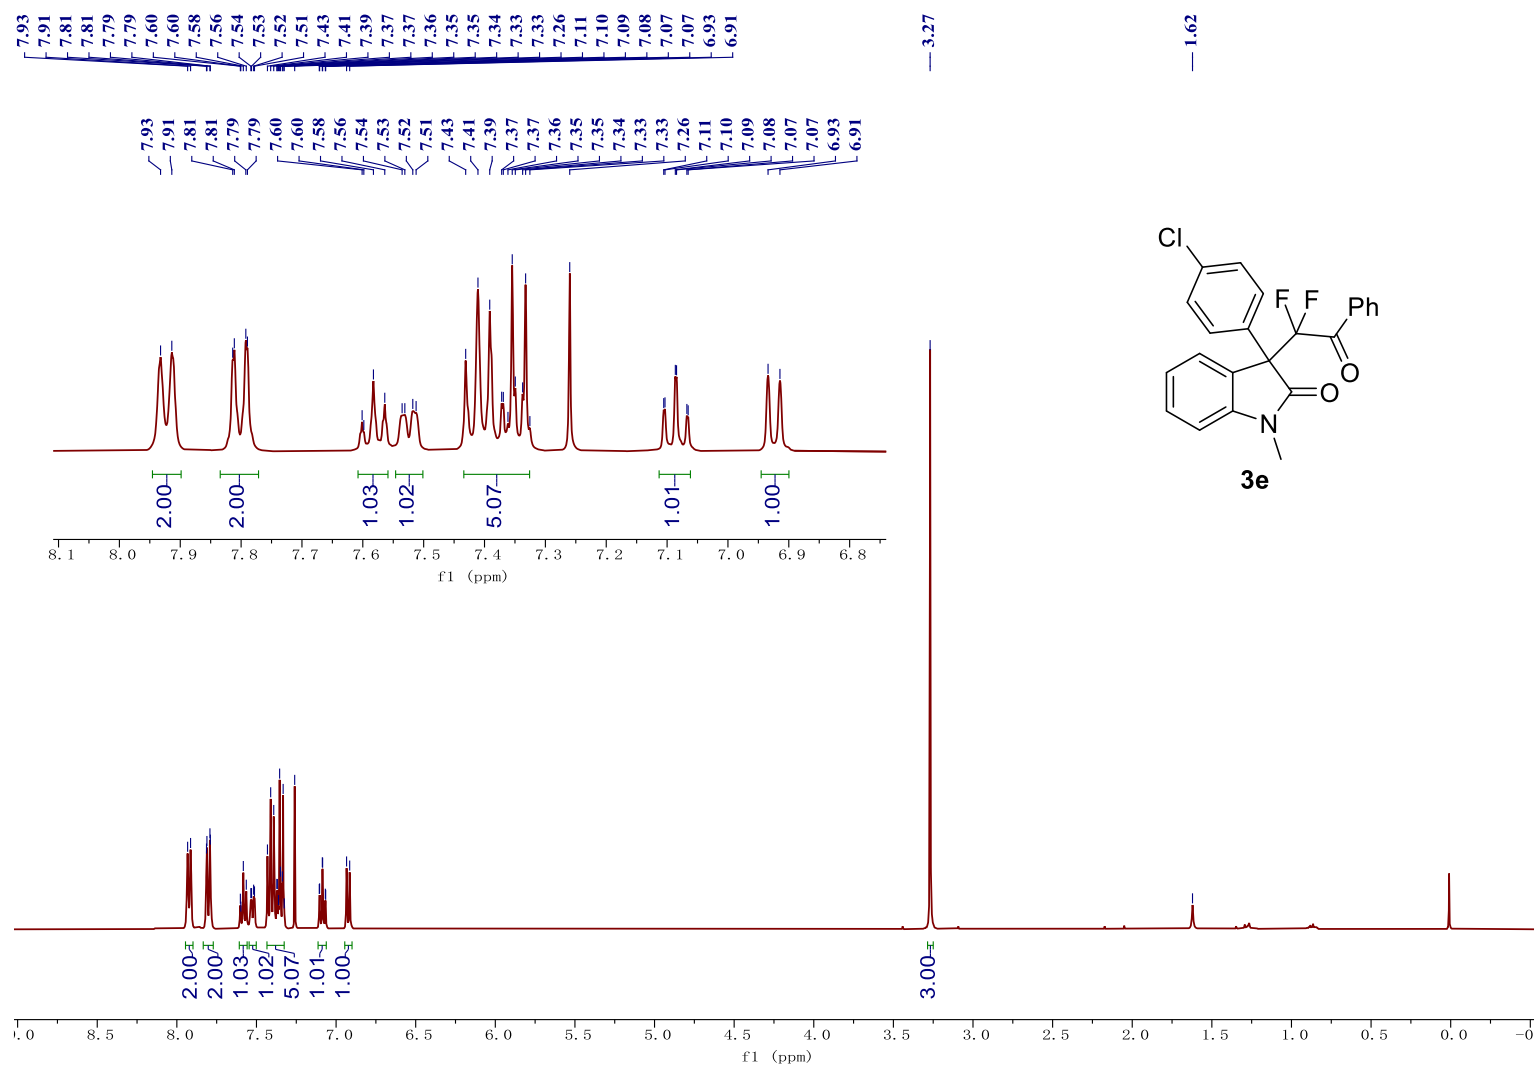



**$^{13}\text{C}$  NMR of Compound 3e (100 MHz,  $\text{CDCl}_3$ )**

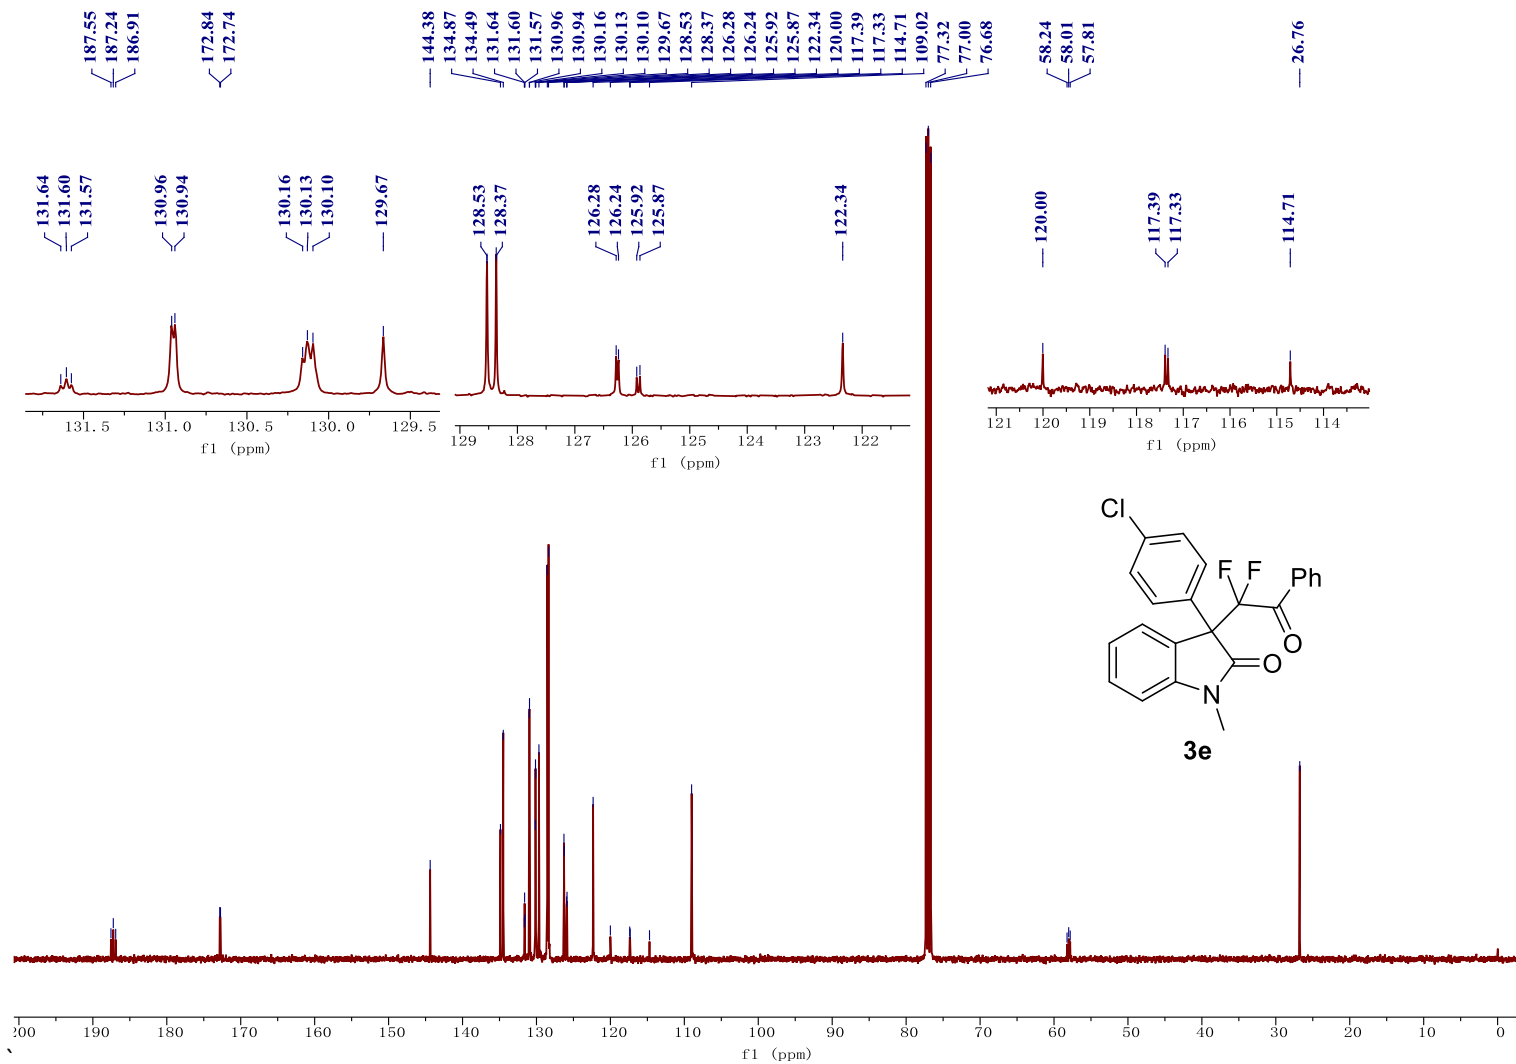

**$^{19}\text{F}$  NMR of Compound 3e (376 MHz,  $\text{CDCl}_3$ )**

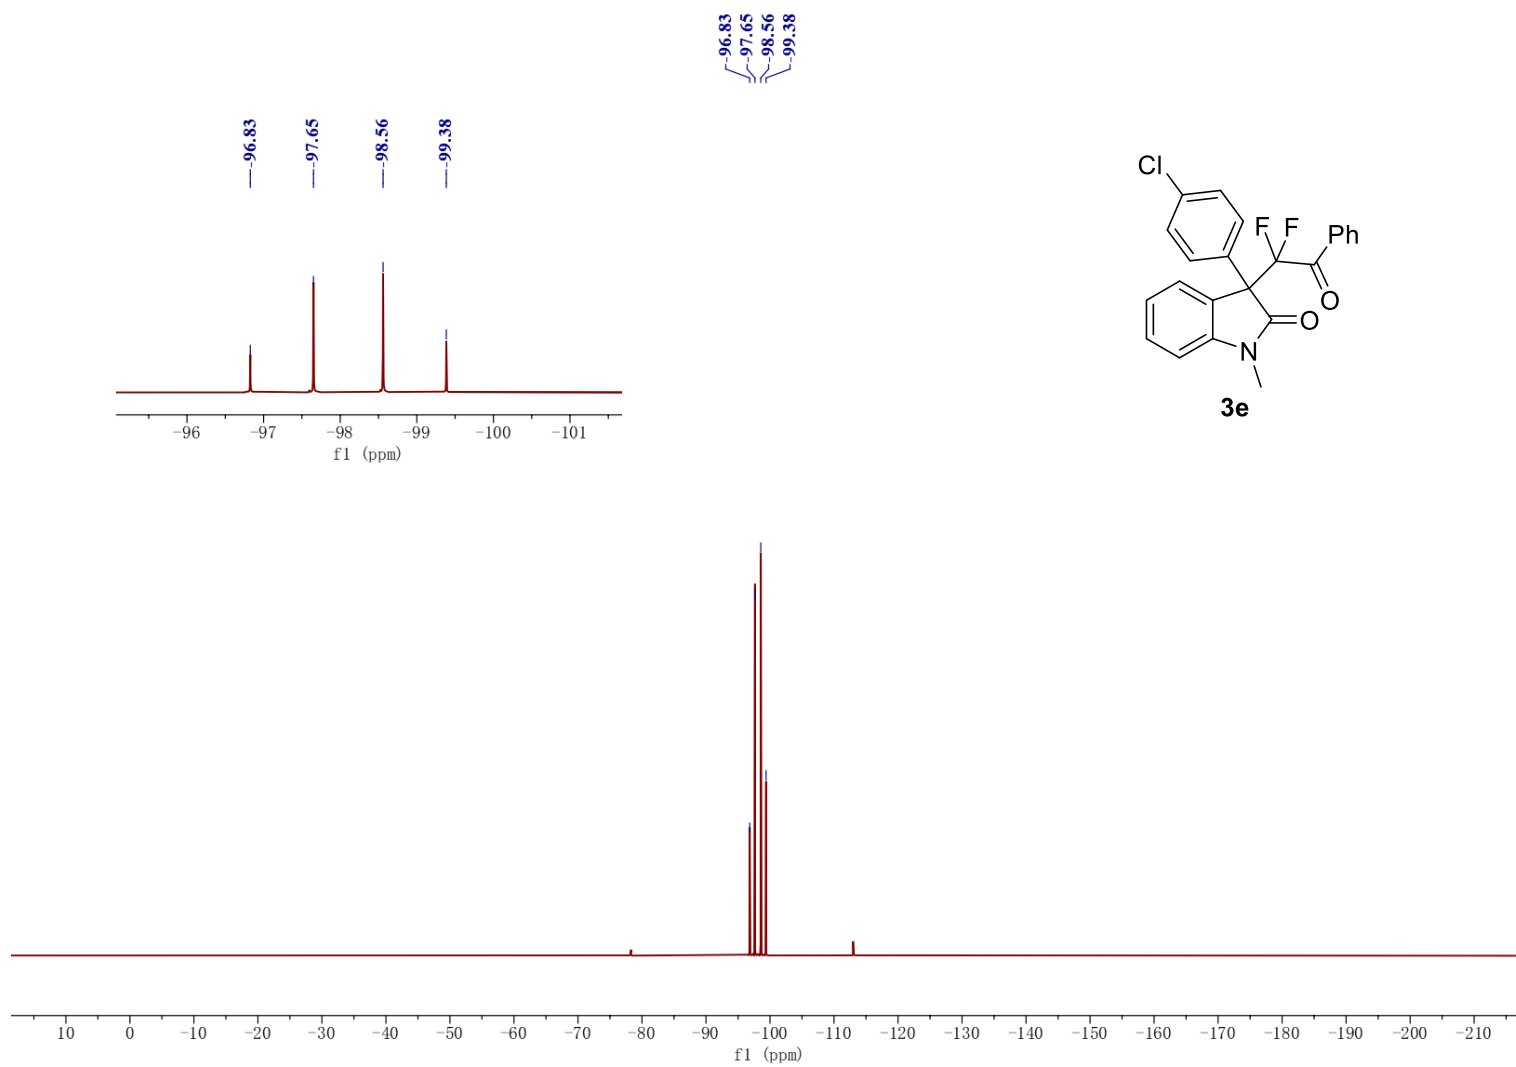

### <sup>1</sup>H NMR of Compound 3f (400 MHz, CDCl<sub>3</sub>)

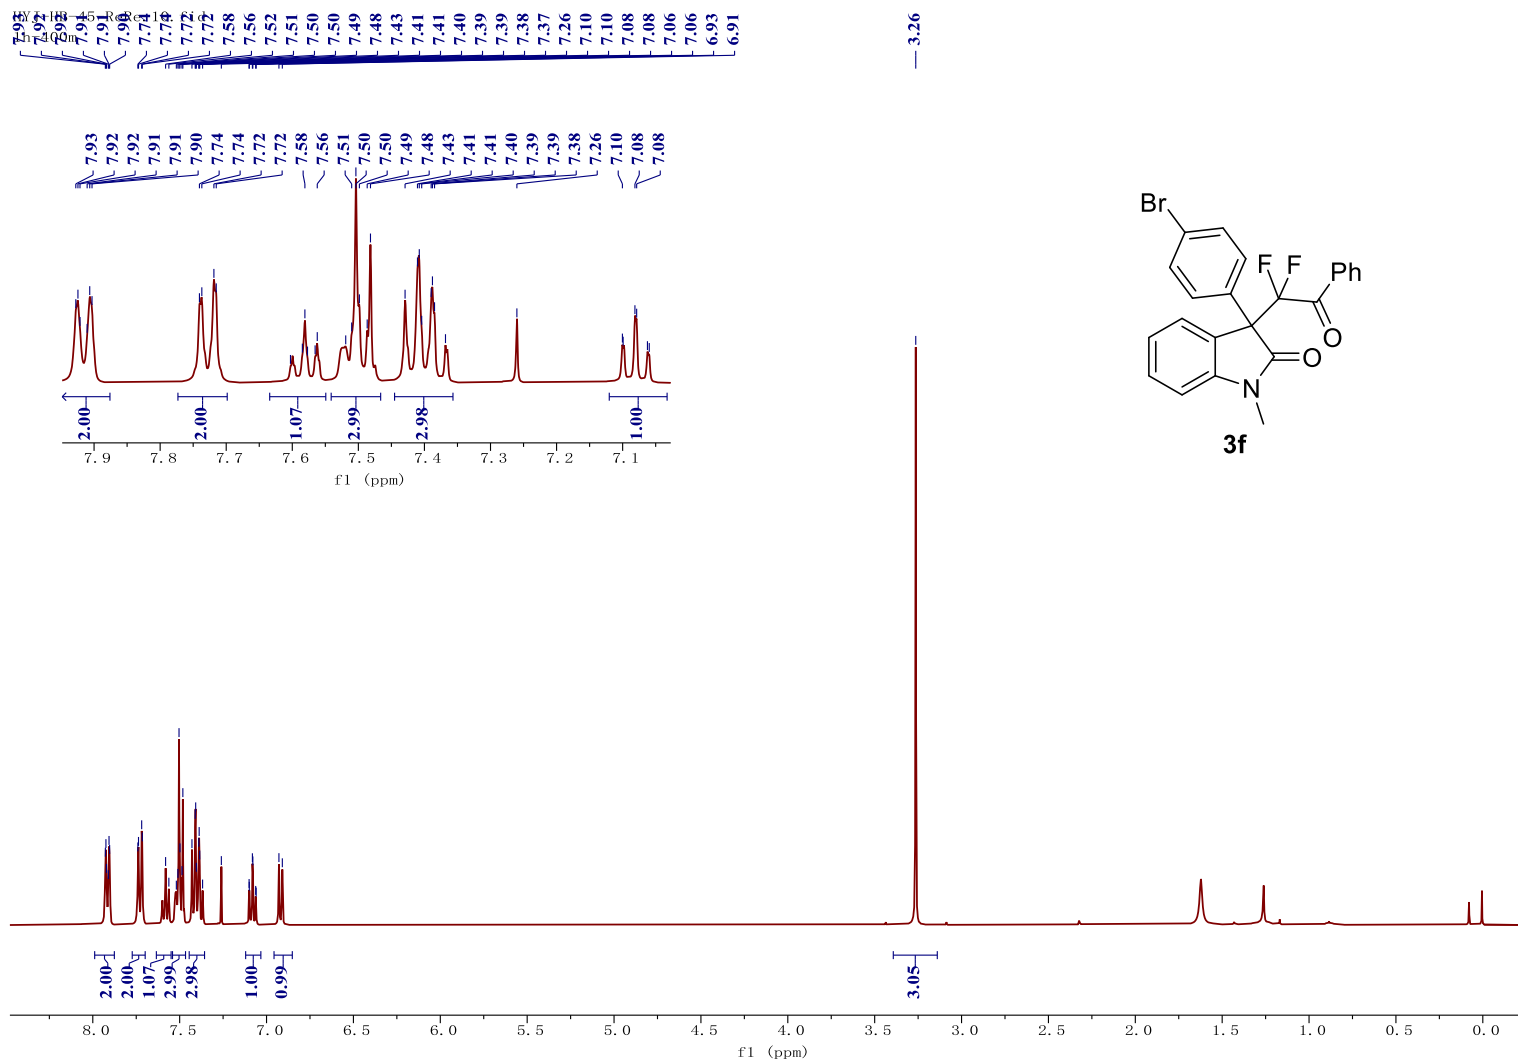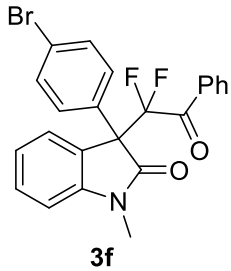

**$^{13}\text{C}$  NMR of Compound 3f (500 MHz,  $\text{CDCl}_3$ )**

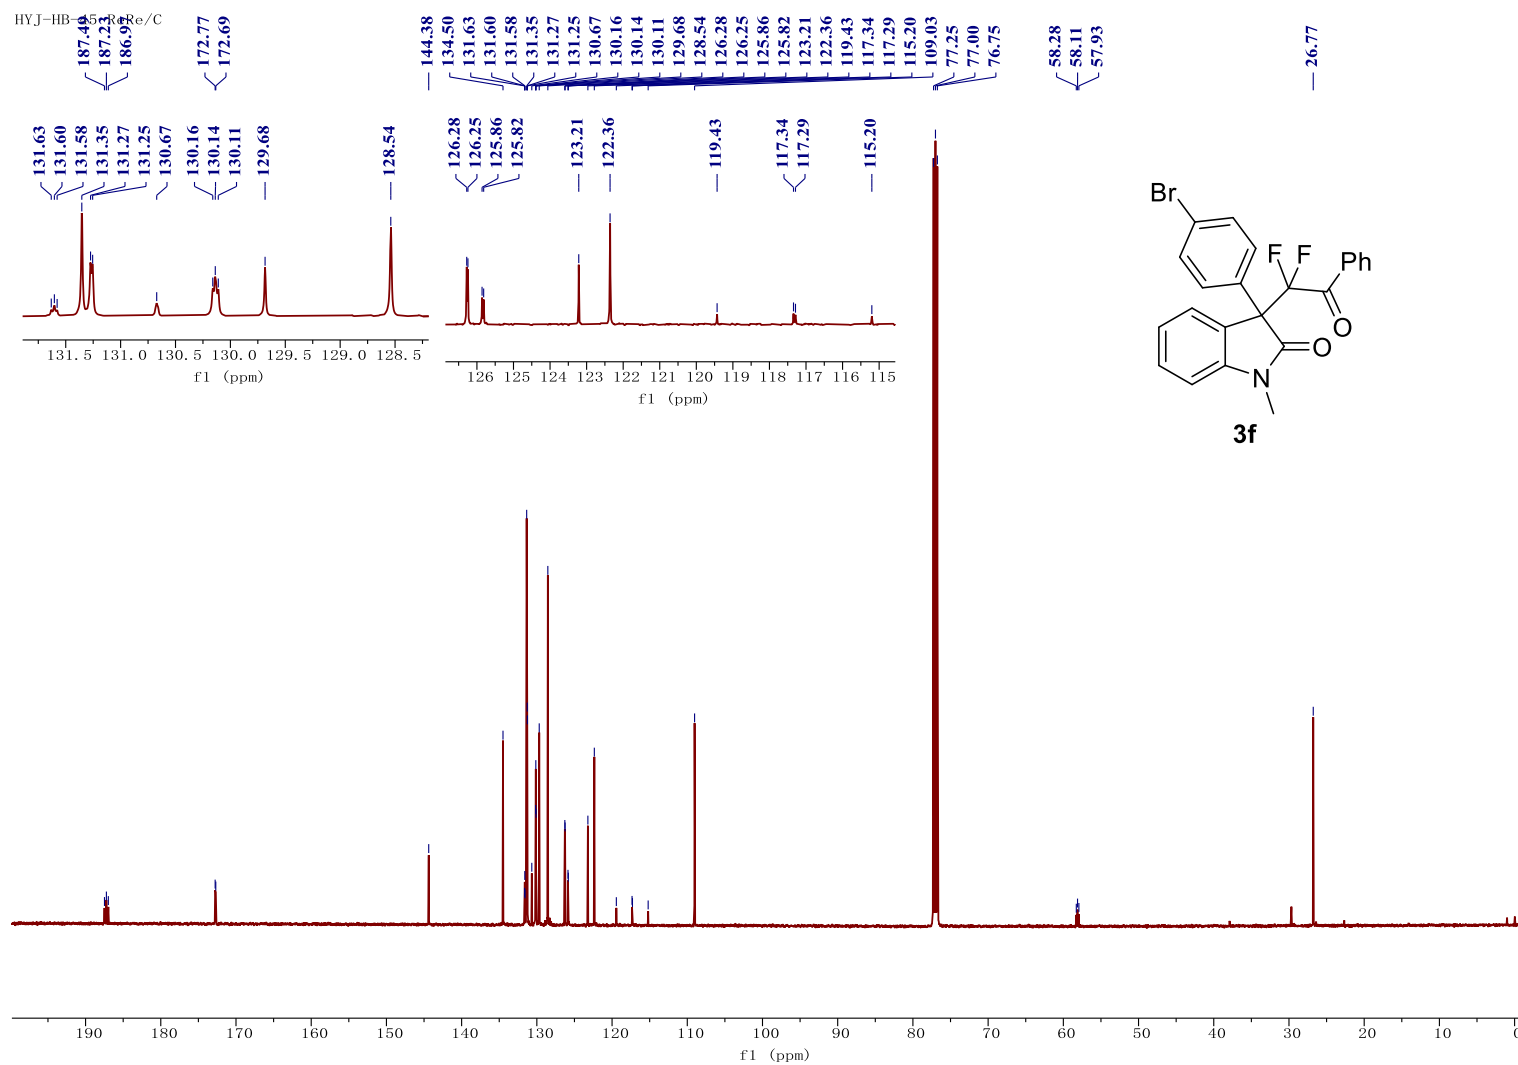

# <sup>19</sup>F NMR of Compound 3f (376 MHz, CDCl<sub>3</sub>)

HYJ-HB-45-ReRe. 11. fid  
19f-400m

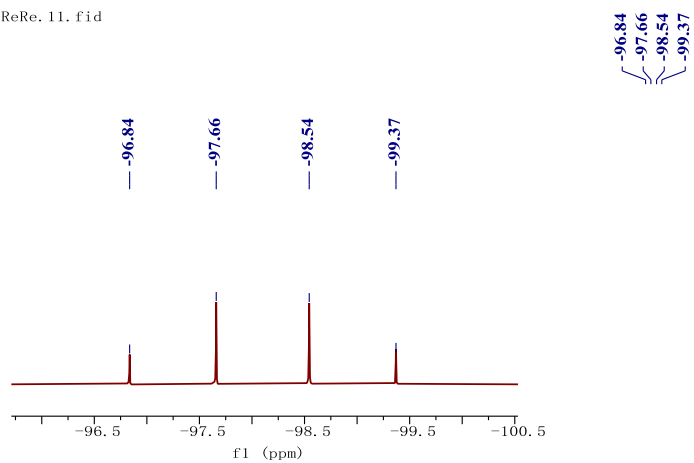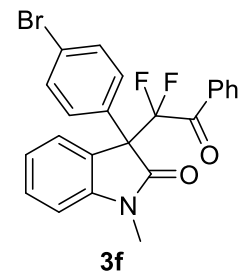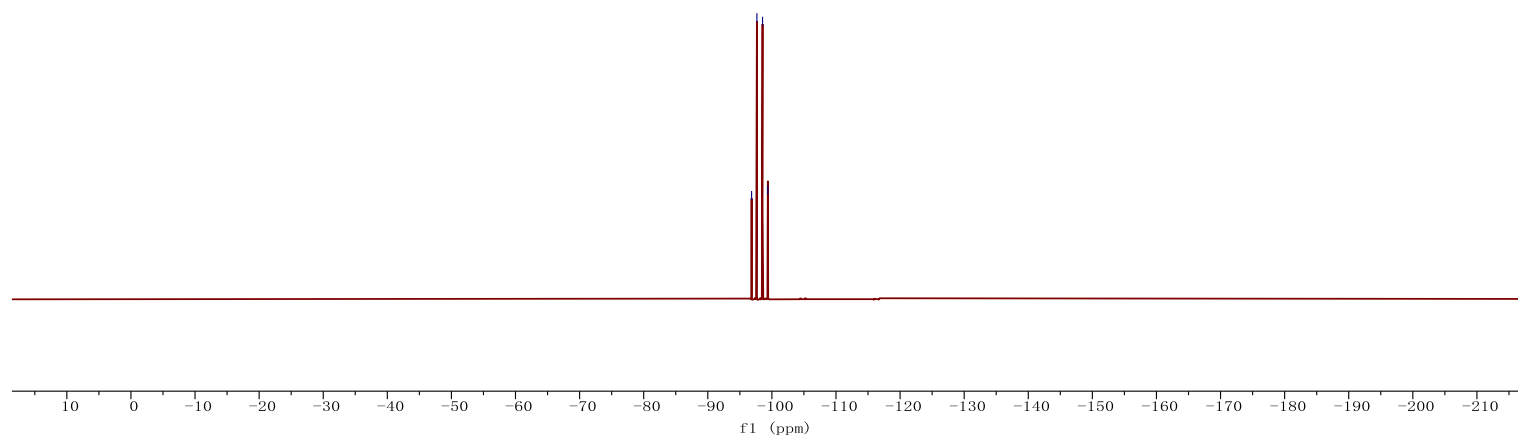

# <sup>1</sup>H NMR of Compound 3g (400 MHz, CDCl<sub>3</sub>)

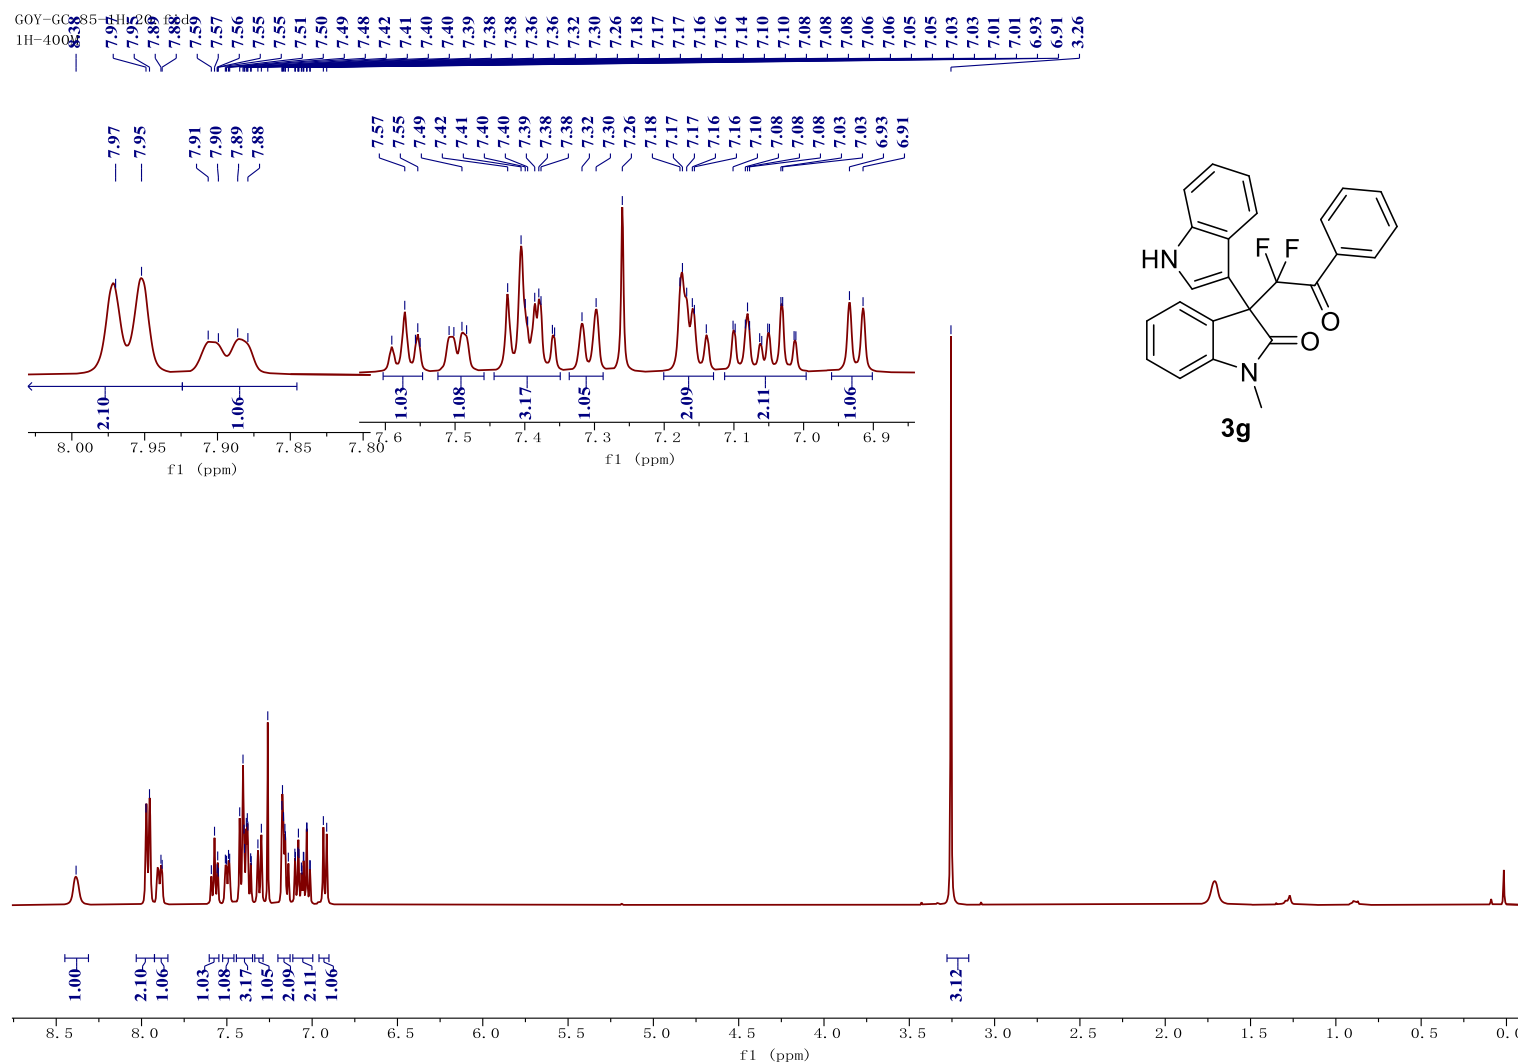

# <sup>13</sup>C NMR of Compound 3g (100 MHz, CDCl<sub>3</sub>)

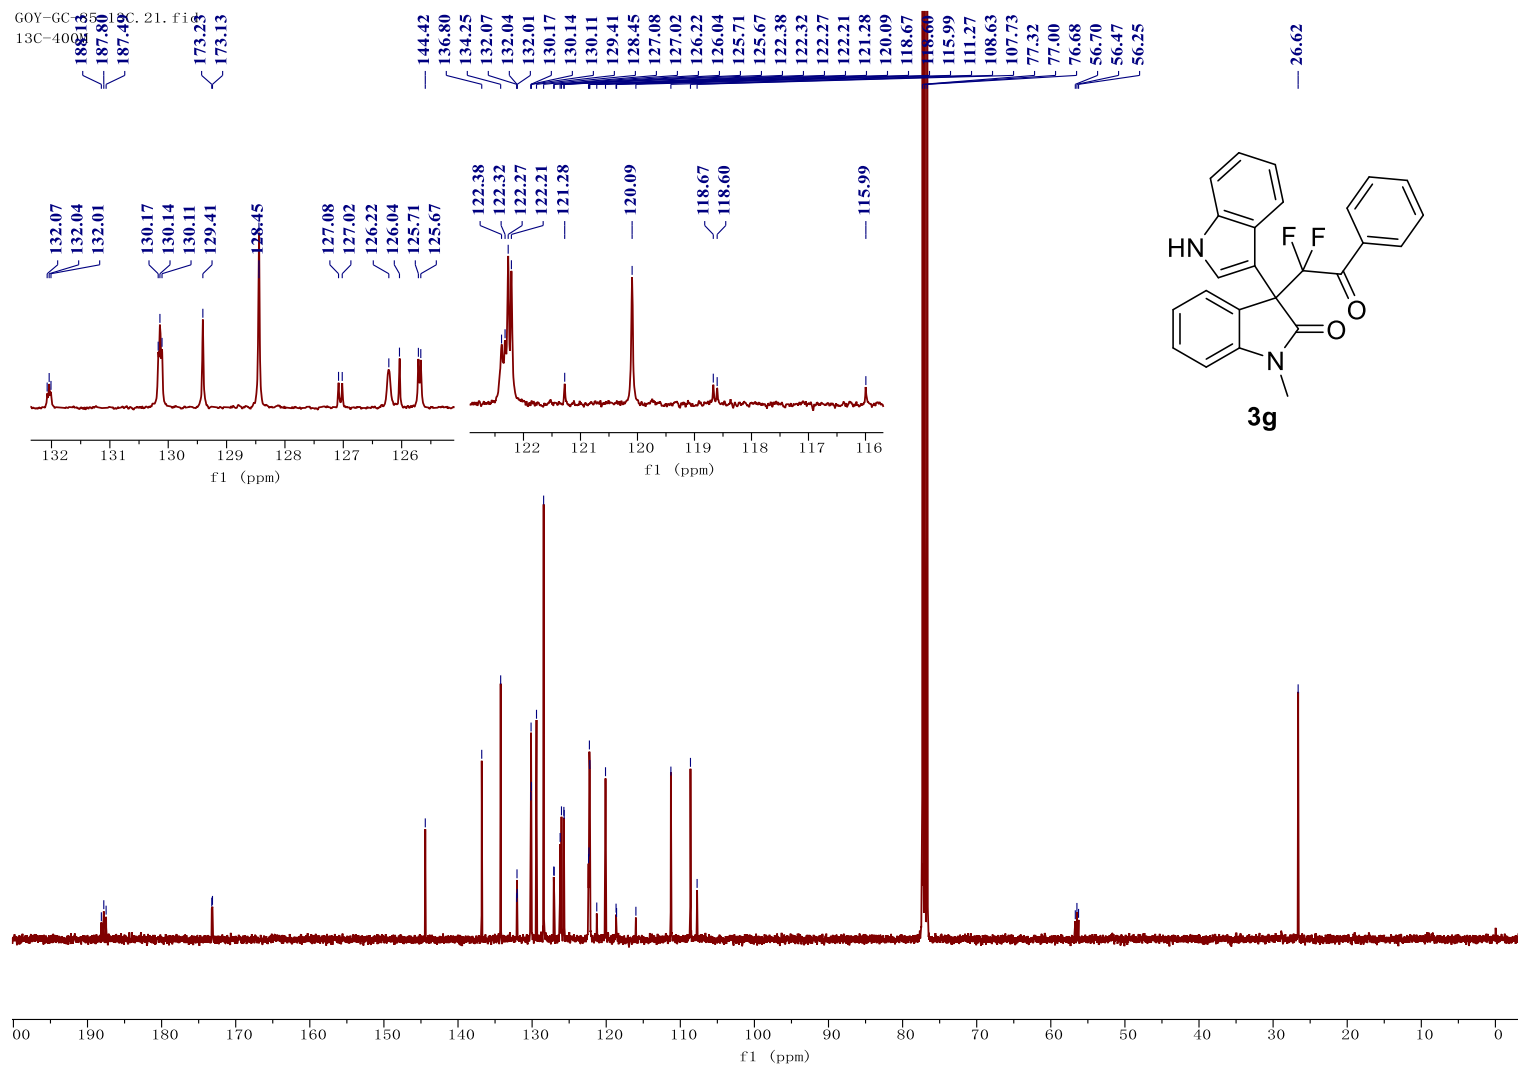

# <sup>19</sup>F NMR of Compound 3g (376 MHz, CDCl<sub>3</sub>)

GOY-GC-85-19F. 22. fid  
19F-400M

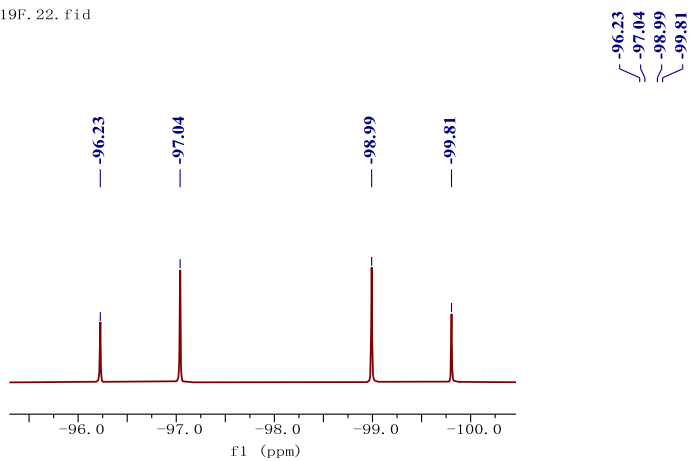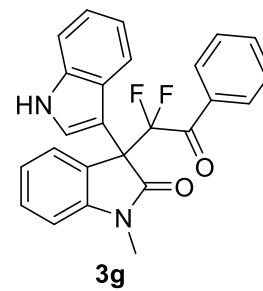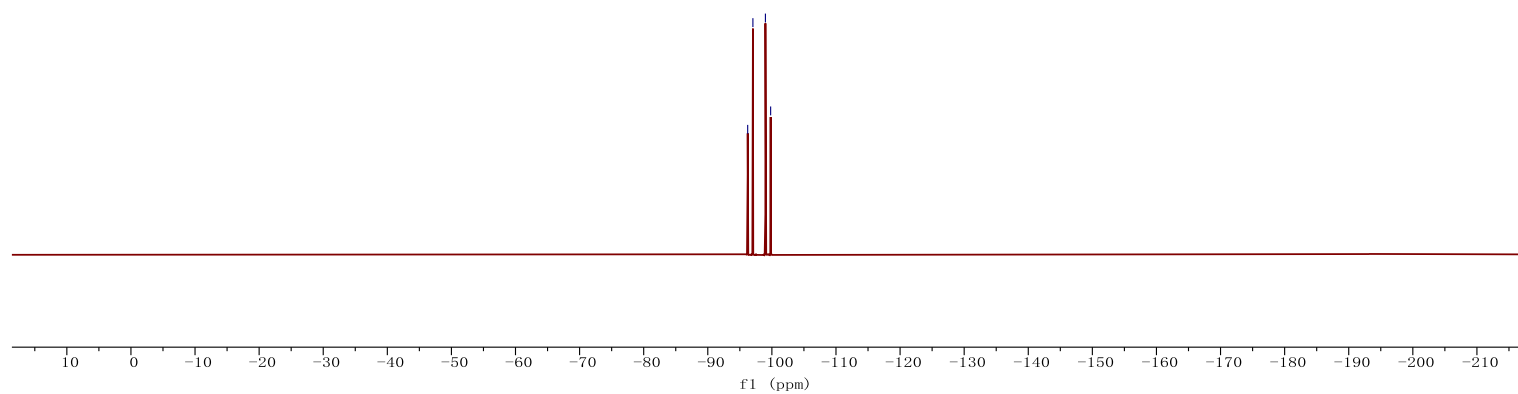



### <sup>1</sup>H NMR of Compound 3h (400 MHz, CDCl<sub>3</sub>)

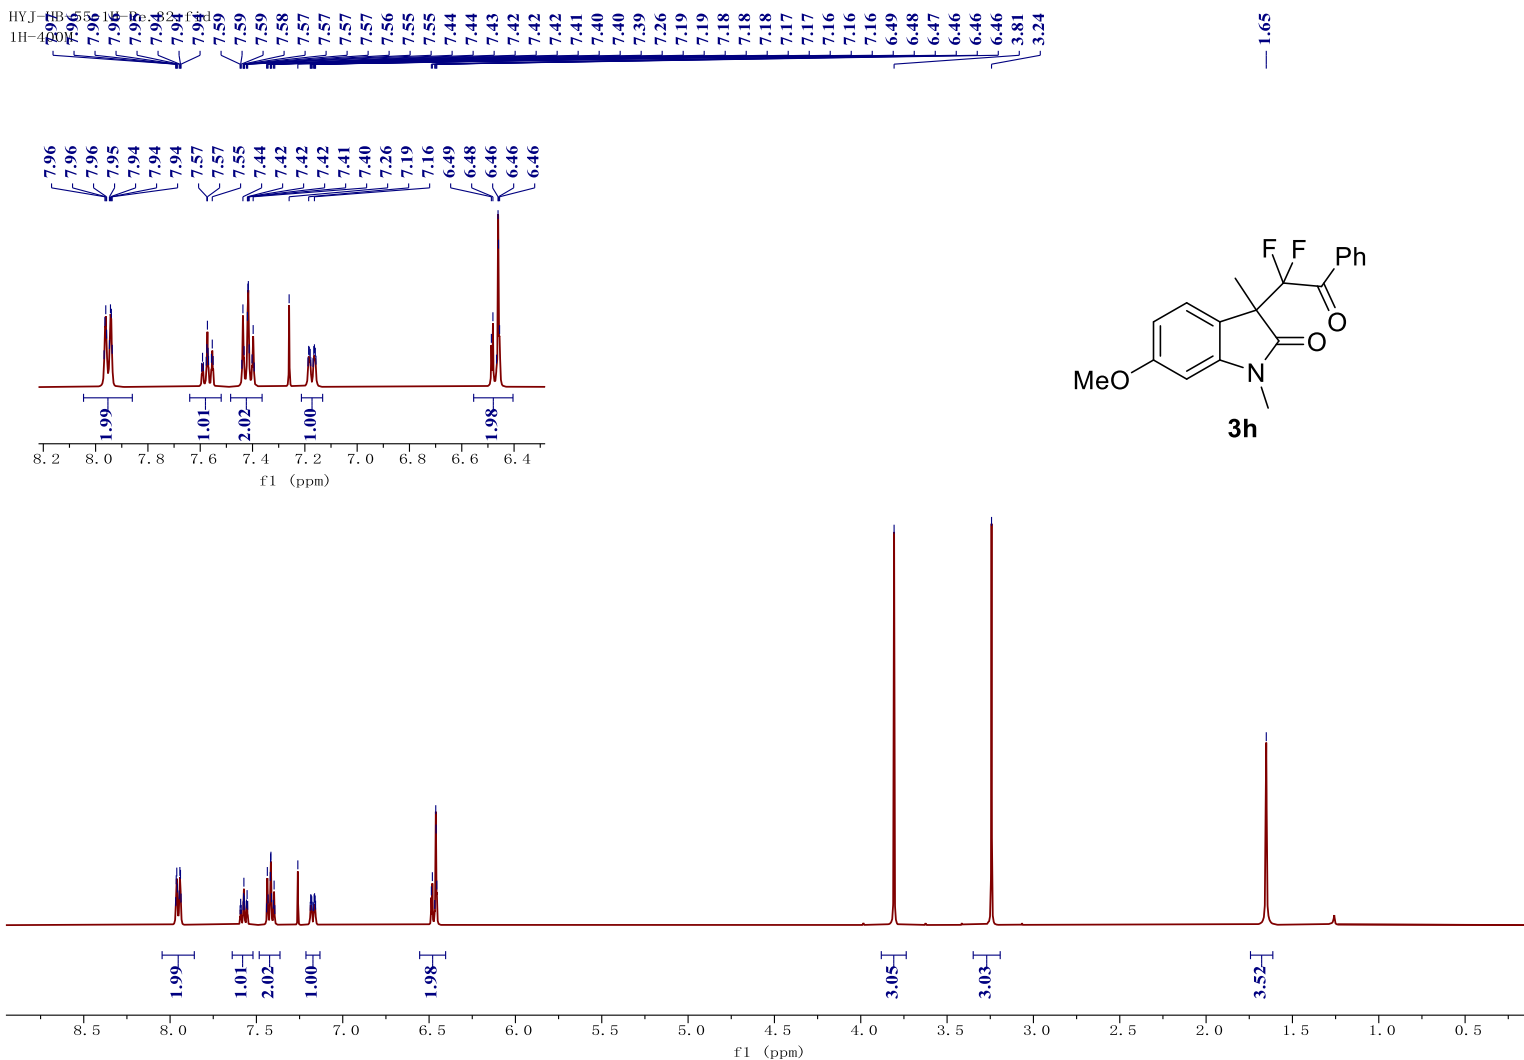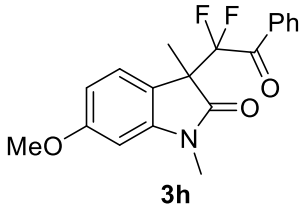

# <sup>13</sup>C NMR of Compound 3h (100 MHz, CDCl<sub>3</sub>)

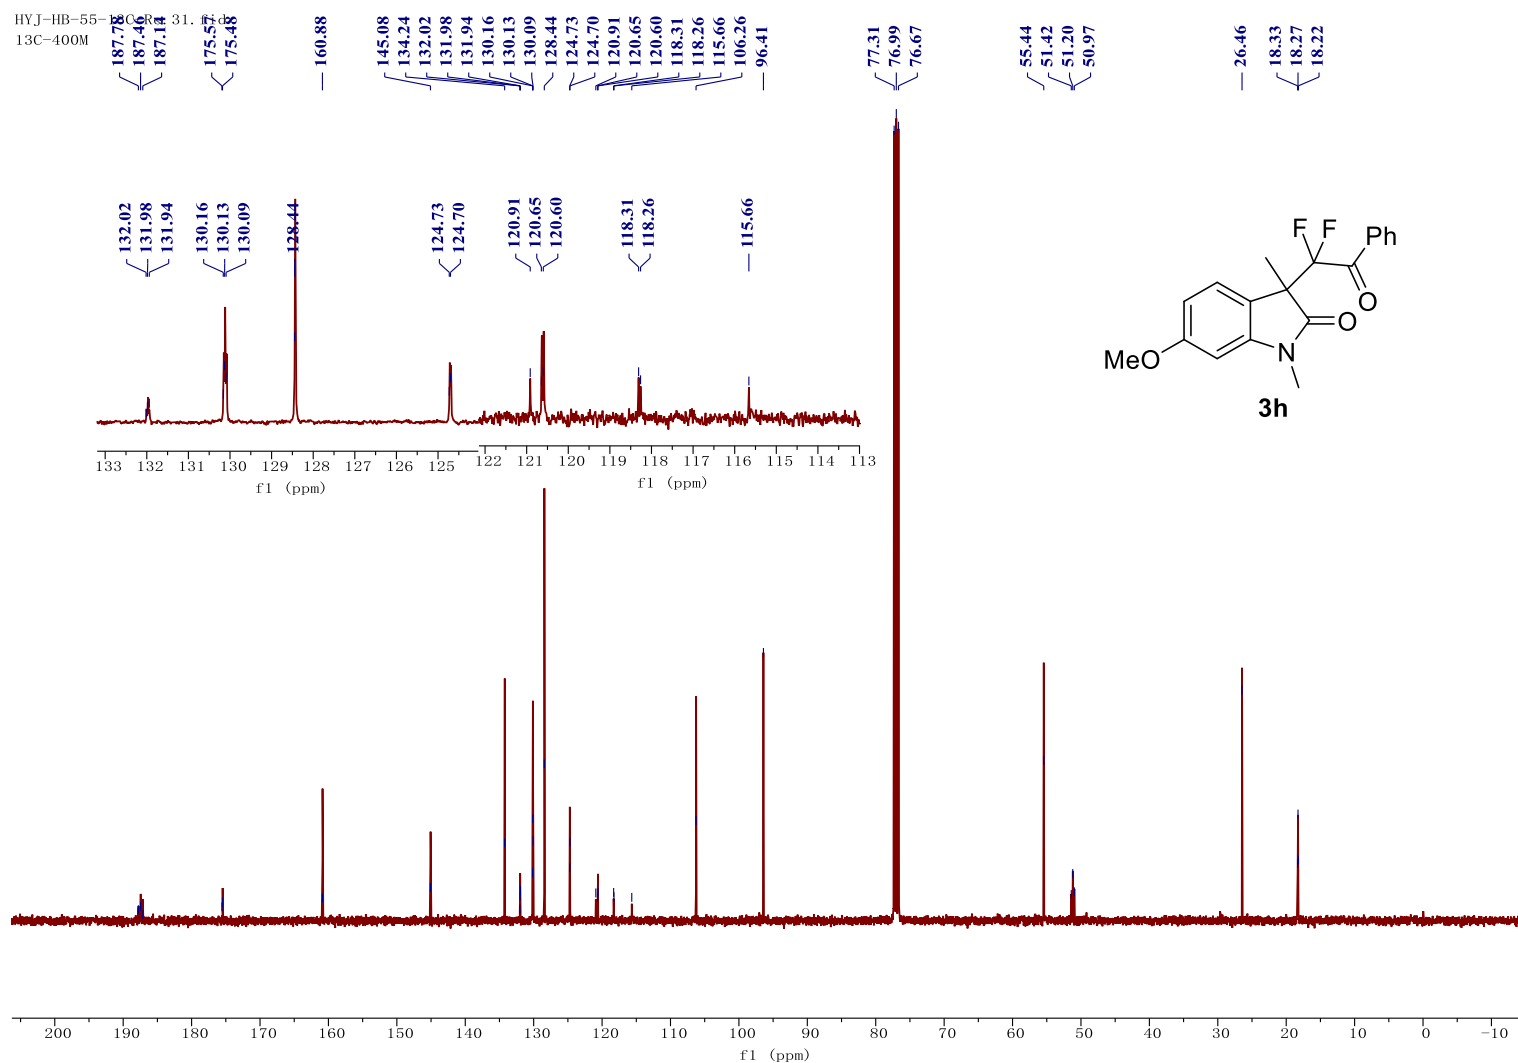

# <sup>19</sup>F NMR of Compound 3h (376 MHz, CDCl<sub>3</sub>)

HYJ-HB-55-19F-Re. 32. fid  
19F-400M

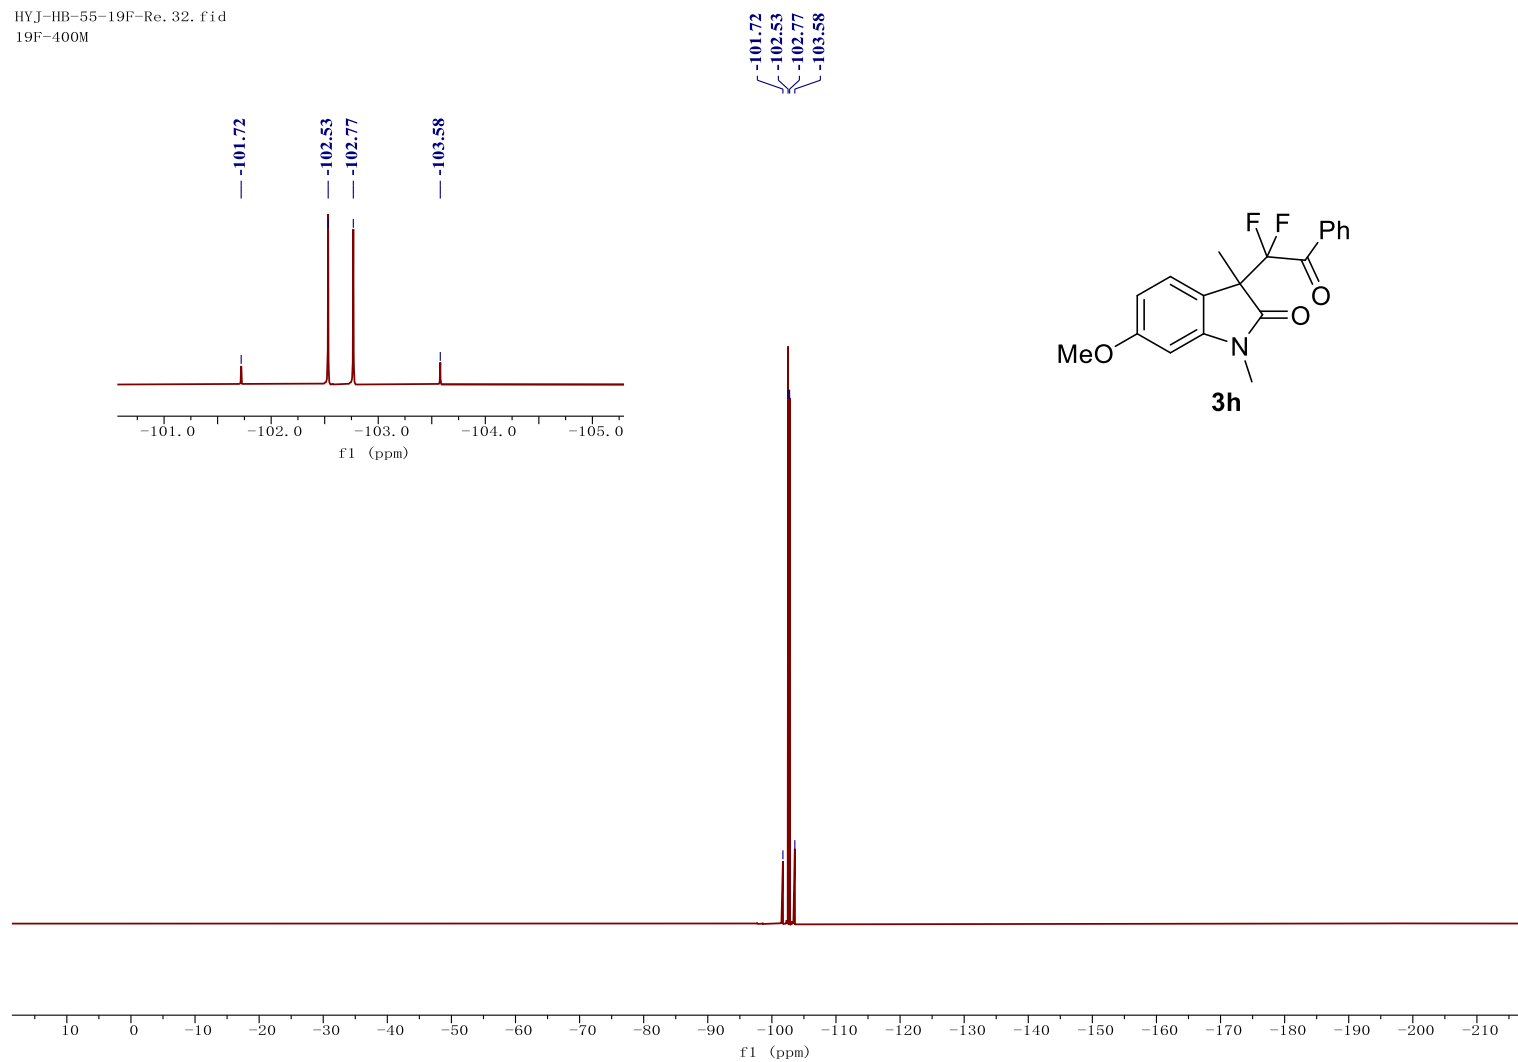

**$^1\text{H}$  NMR of Compound 3i (400 MHz,  $\text{CDCl}_3$ )**

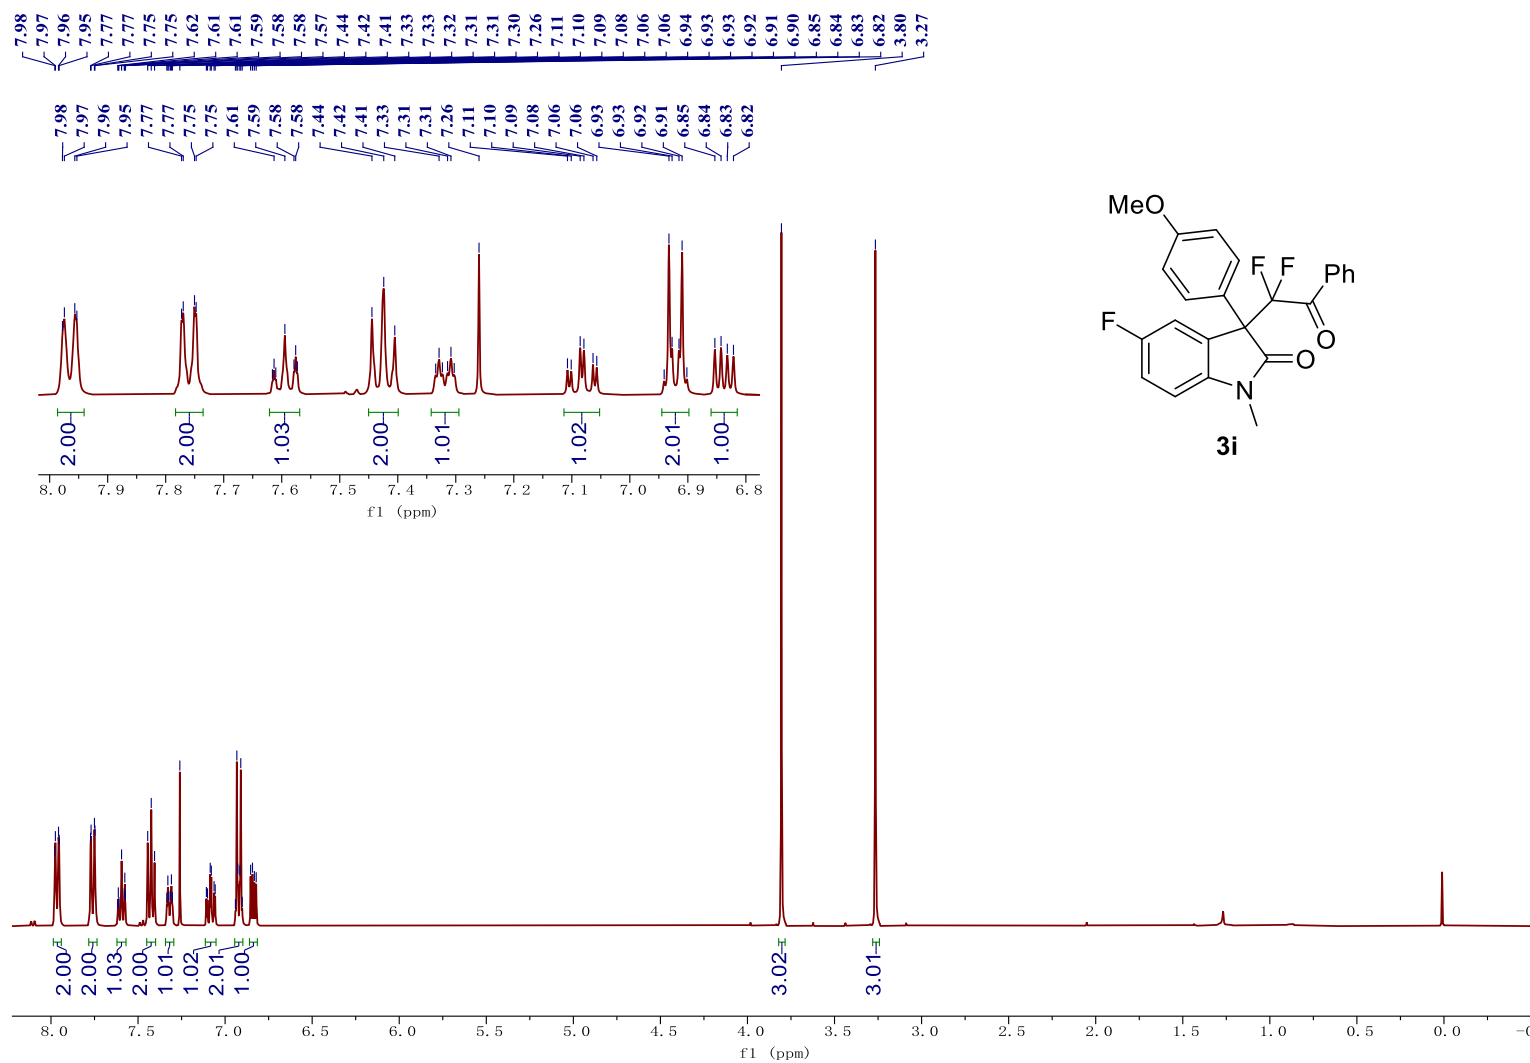

**$^{13}\text{C}$  NMR of Compound 3i (100 MHz,  $\text{CDCl}_3$ )**

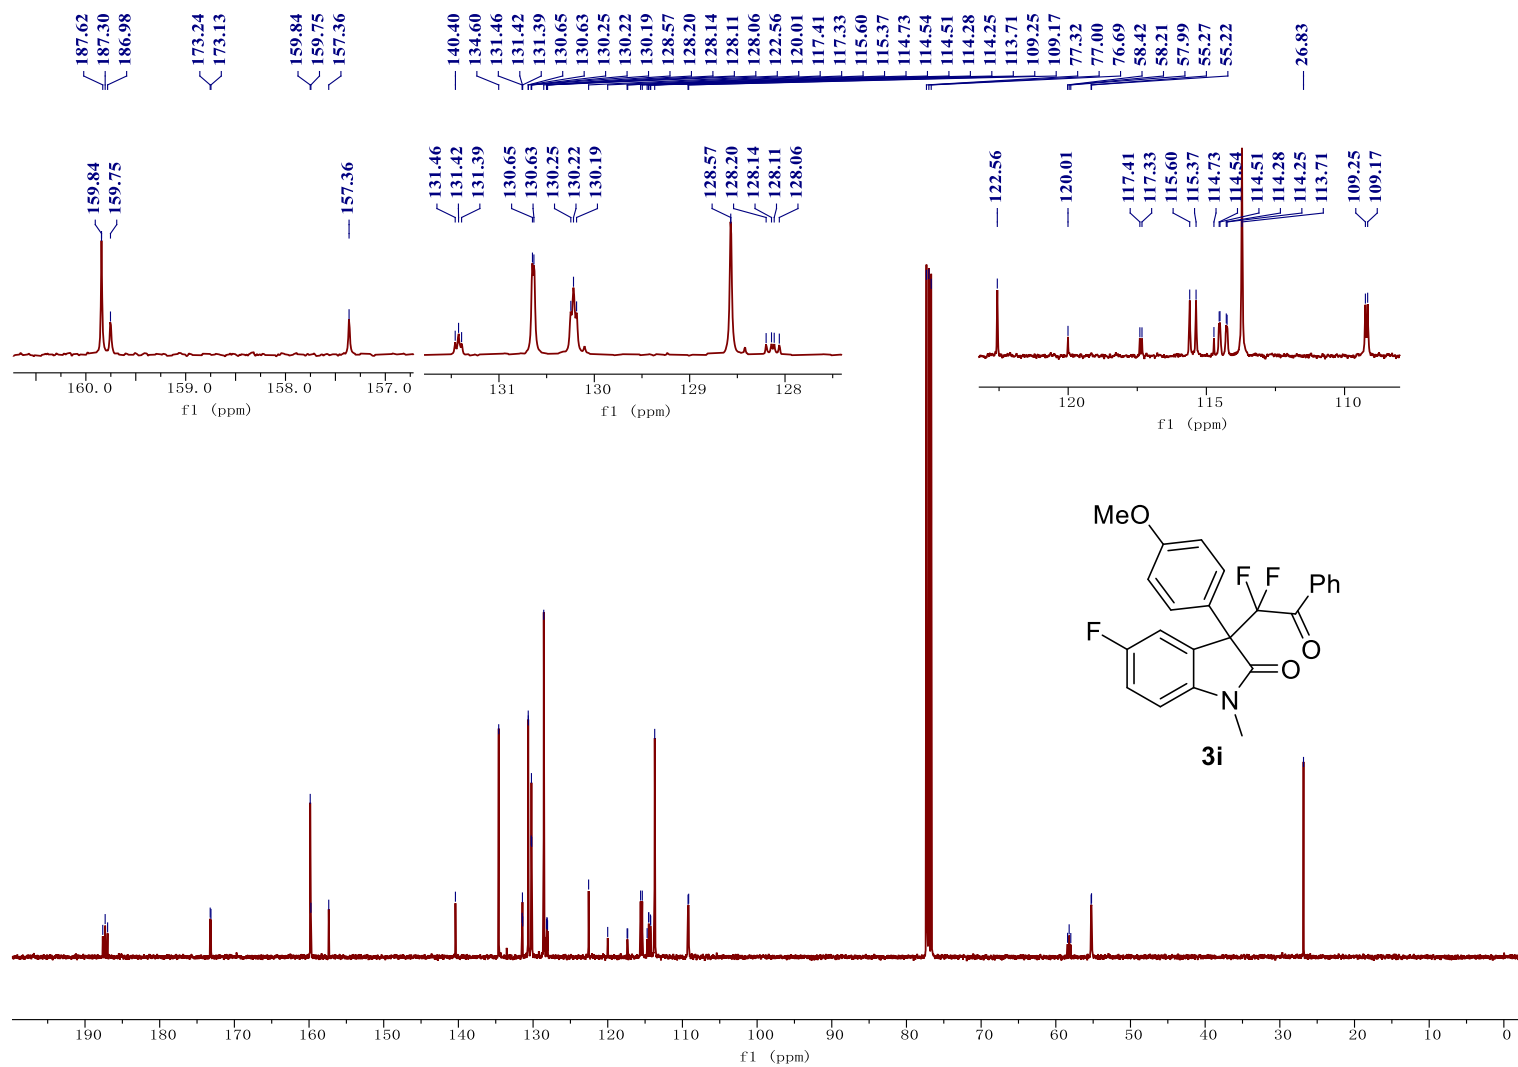

**$^{19}\text{F}$  NMR of Compound 3i (376 MHz,  $\text{CDCl}_3$ )**

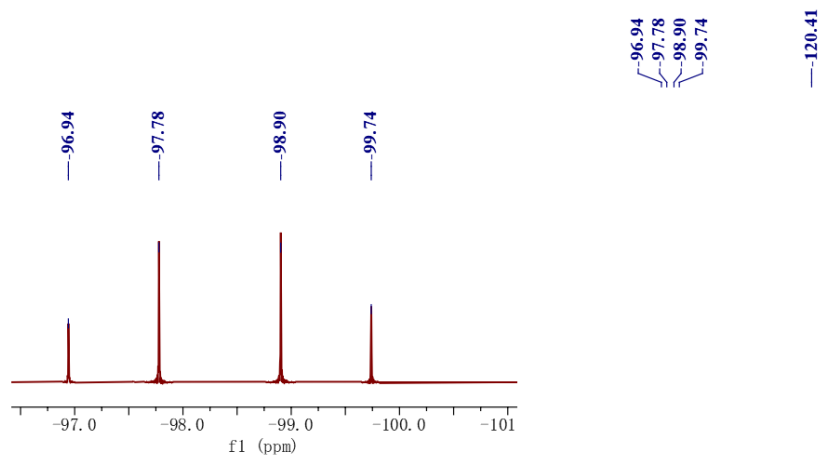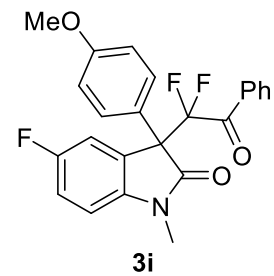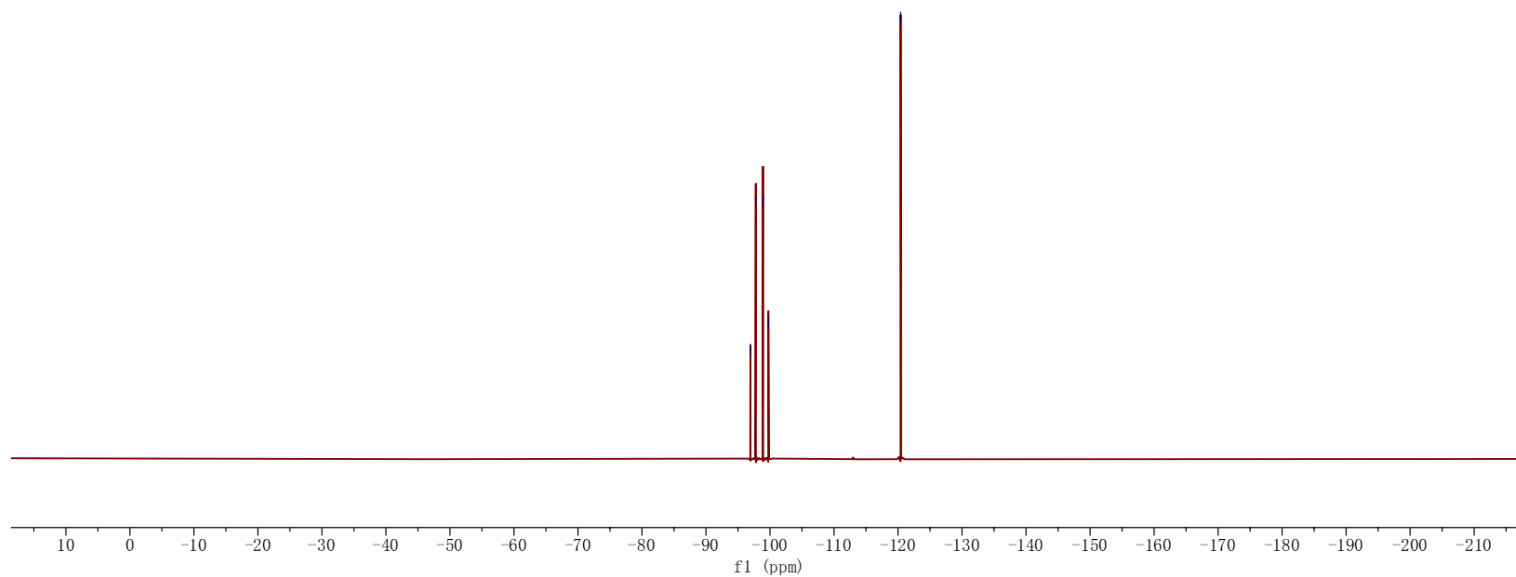

**<sup>1</sup>H NMR of Compound 3j (400 MHz, CDCl<sub>3</sub>)**

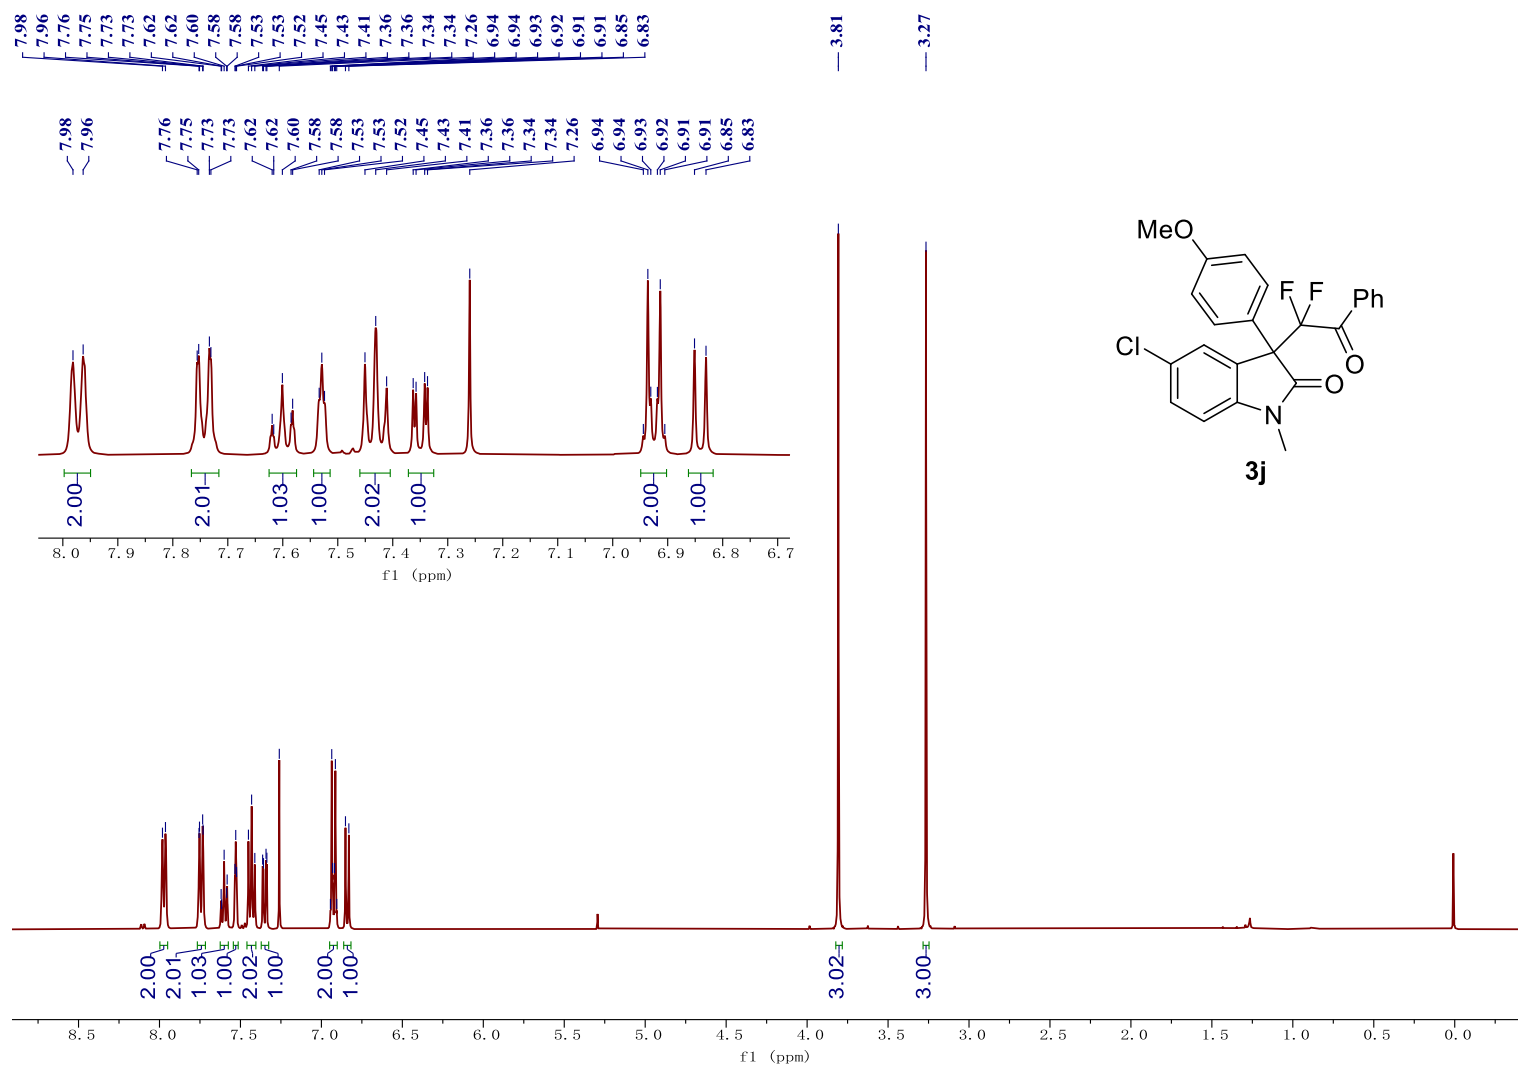

**$^{13}\text{C}$  NMR of Compound 3j (100 MHz,  $\text{CDCl}_3$ )**

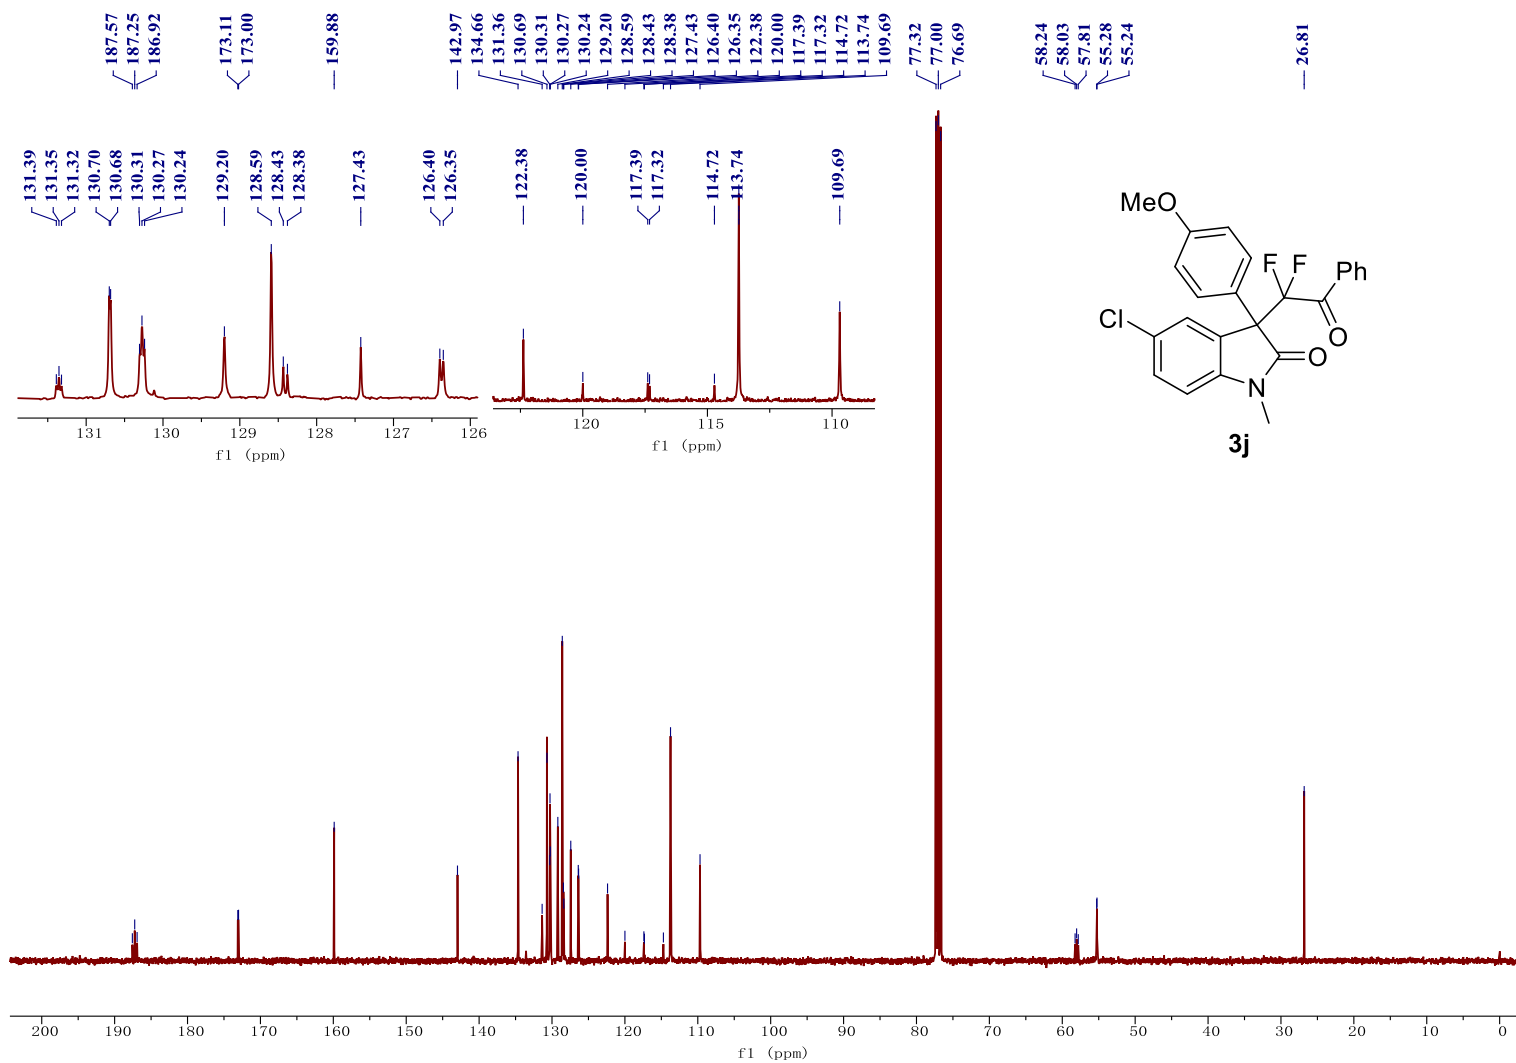



**$^{19}\text{F}$  NMR of Compound 3j (376 MHz,  $\text{CDCl}_3$ )**

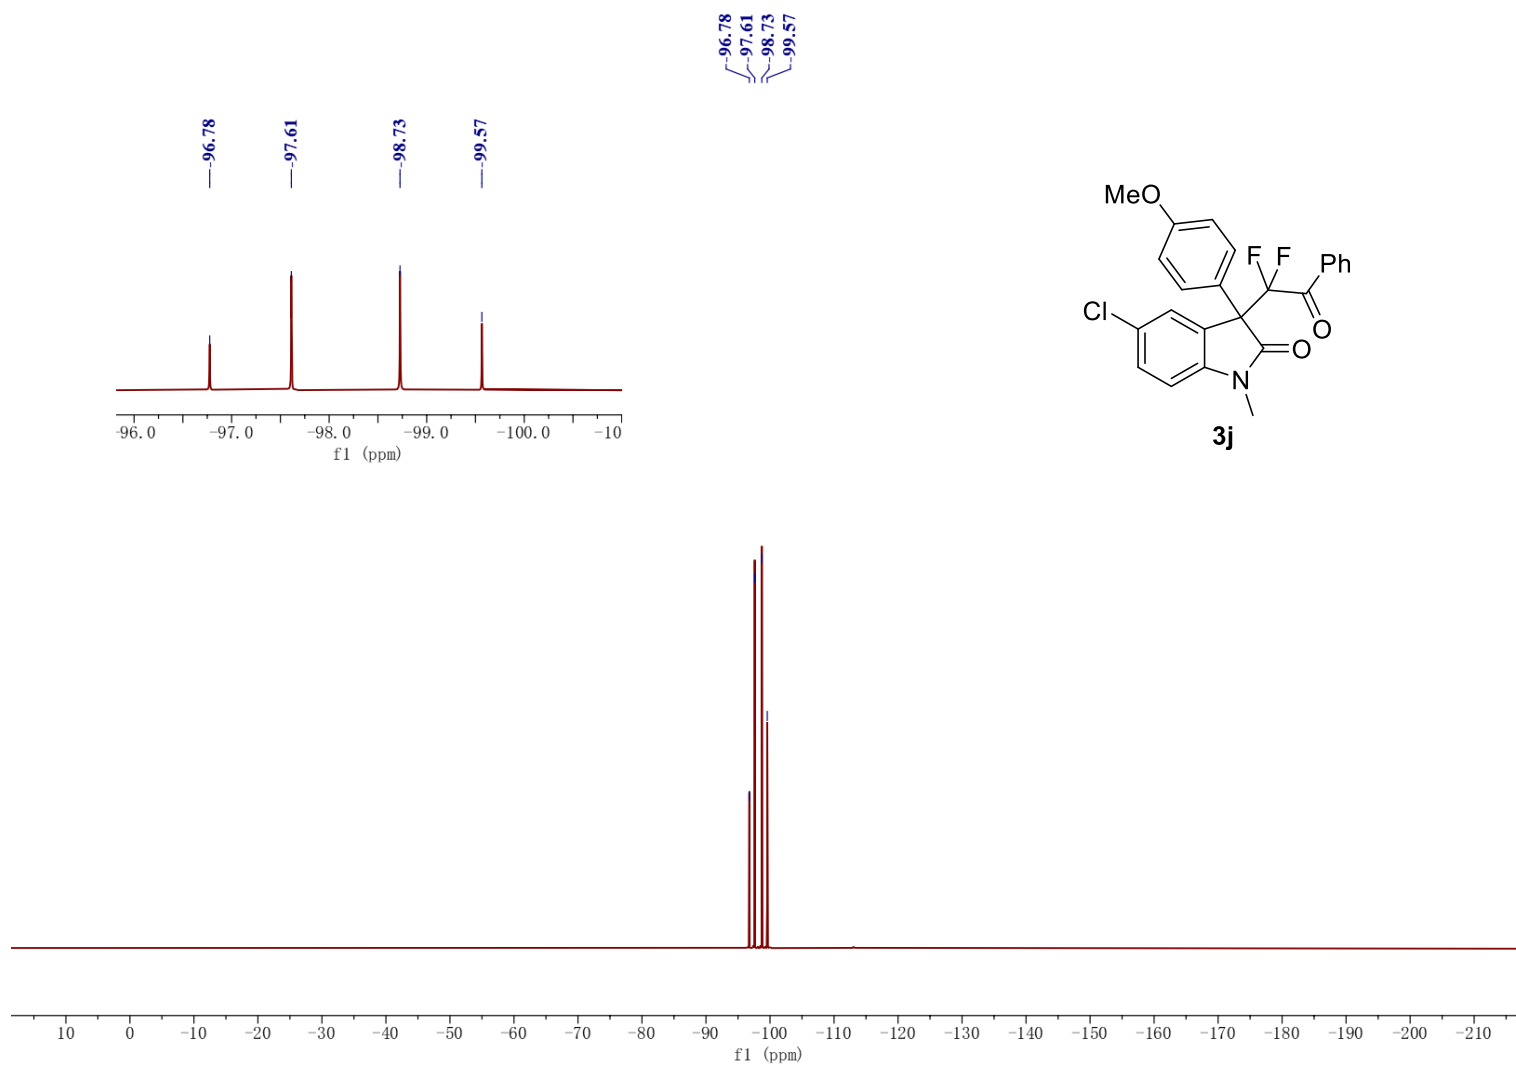

<sup>1</sup>H NMR of Compound 3k (400 MHz, CDCl<sub>3</sub>)

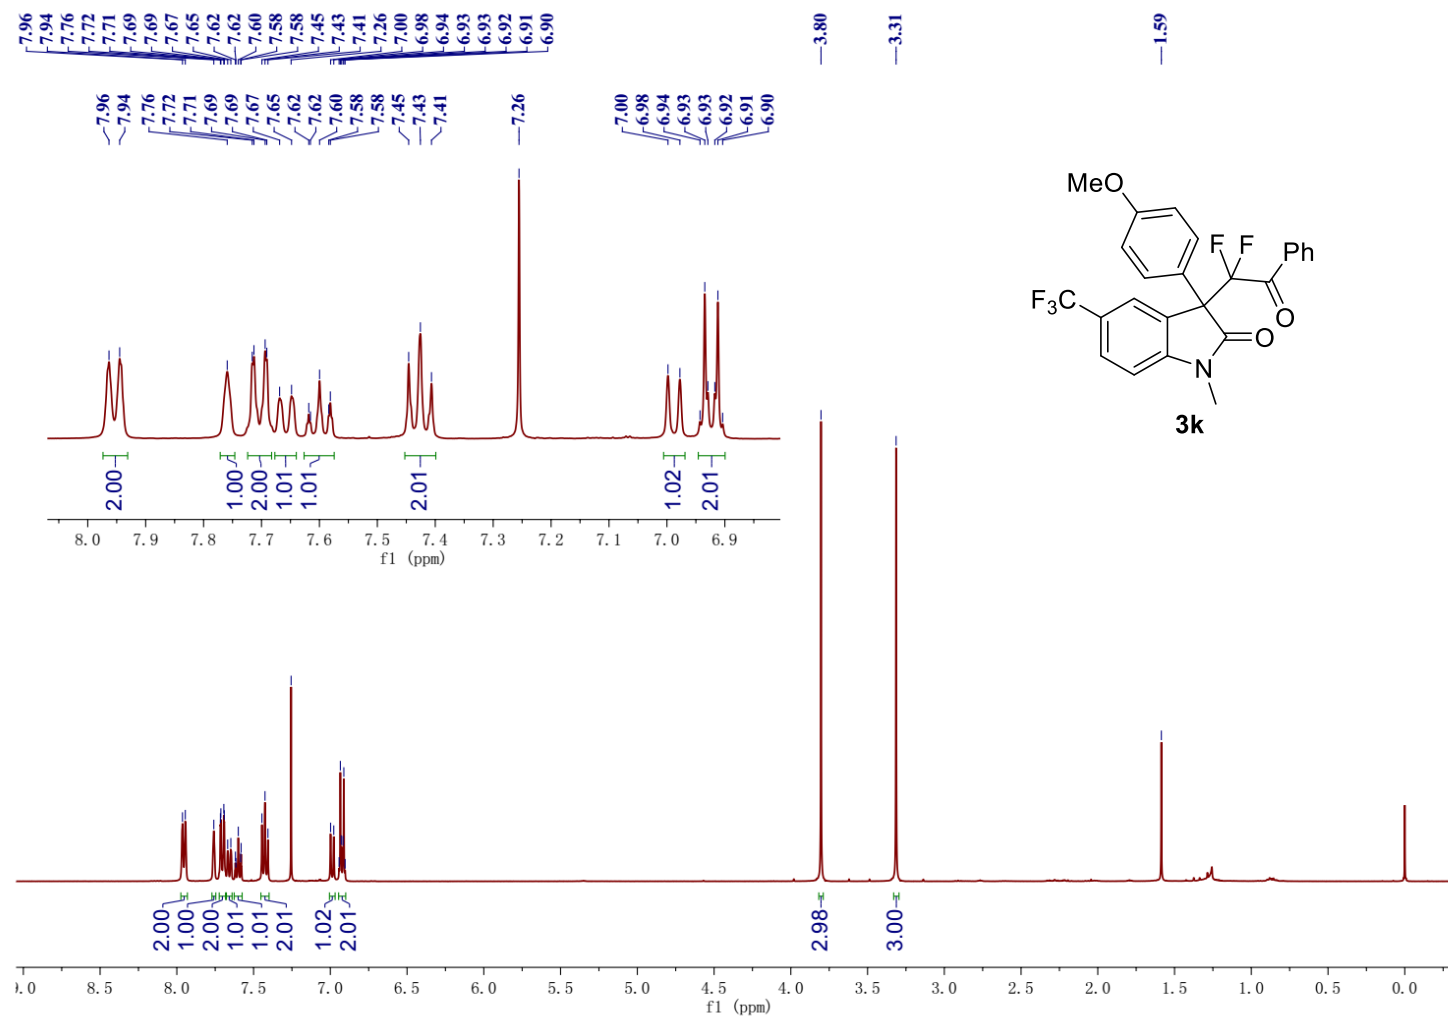

**$^{13}\text{C}$  NMR of Compound 3k (100 MHz,  $\text{CDCl}_3$ )**

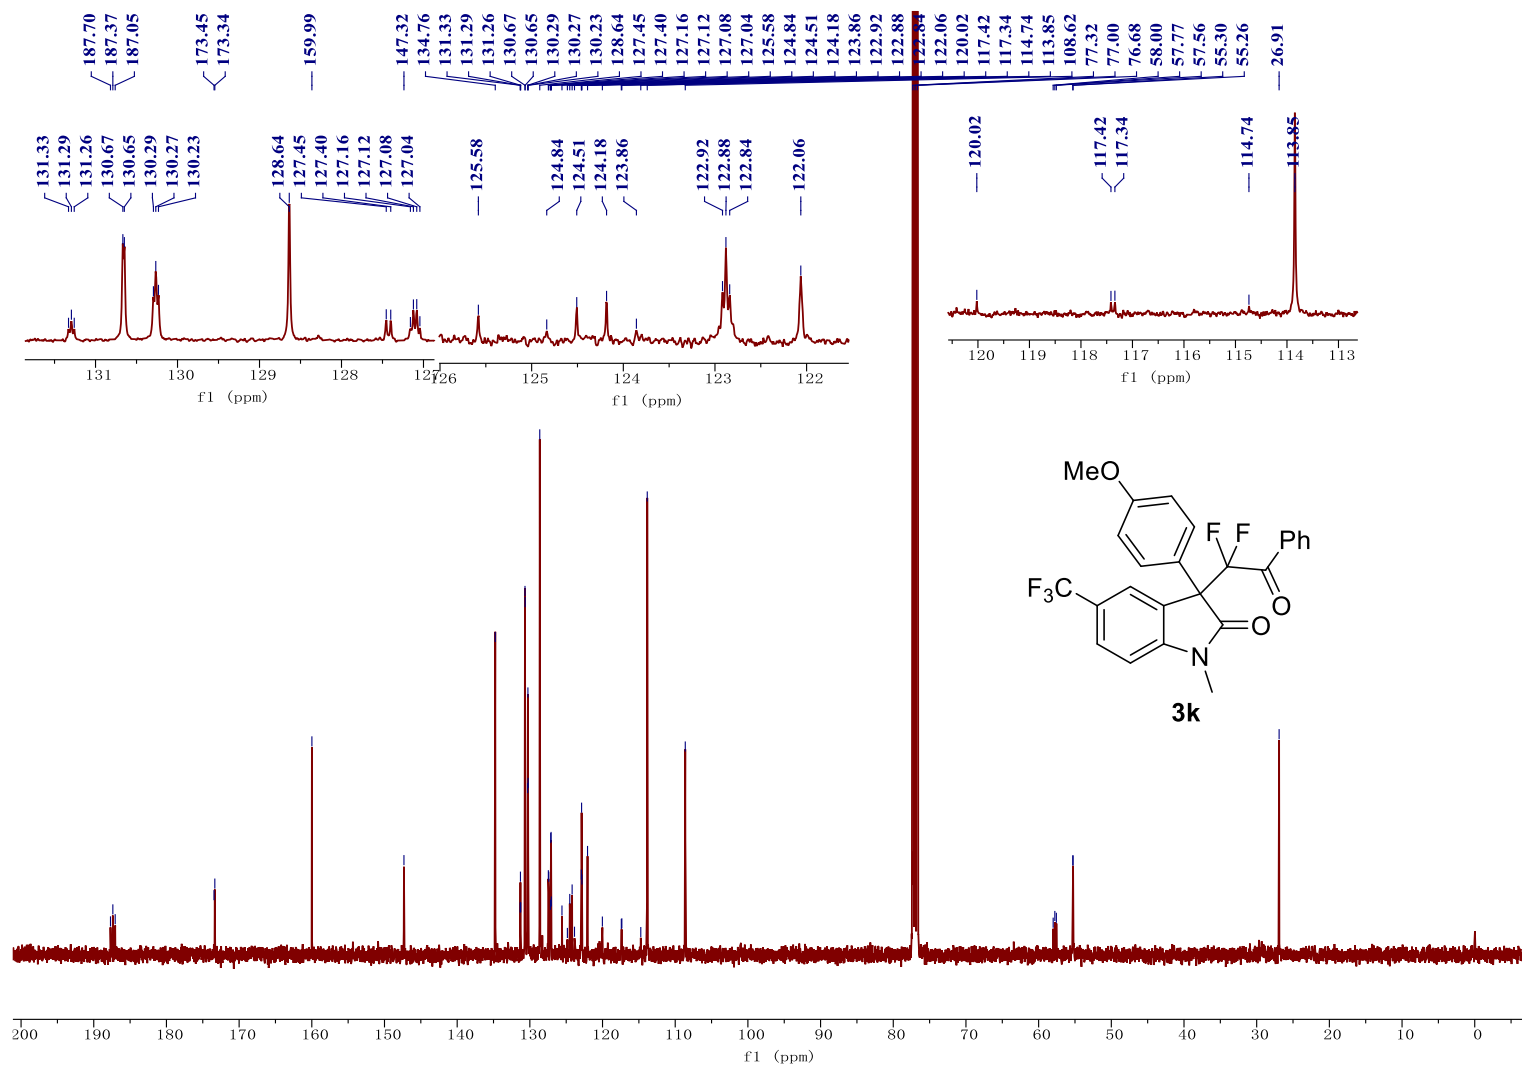

**$^{19}\text{F}$  NMR of Compound 3k (376 MHz,  $\text{CDCl}_3$ )**

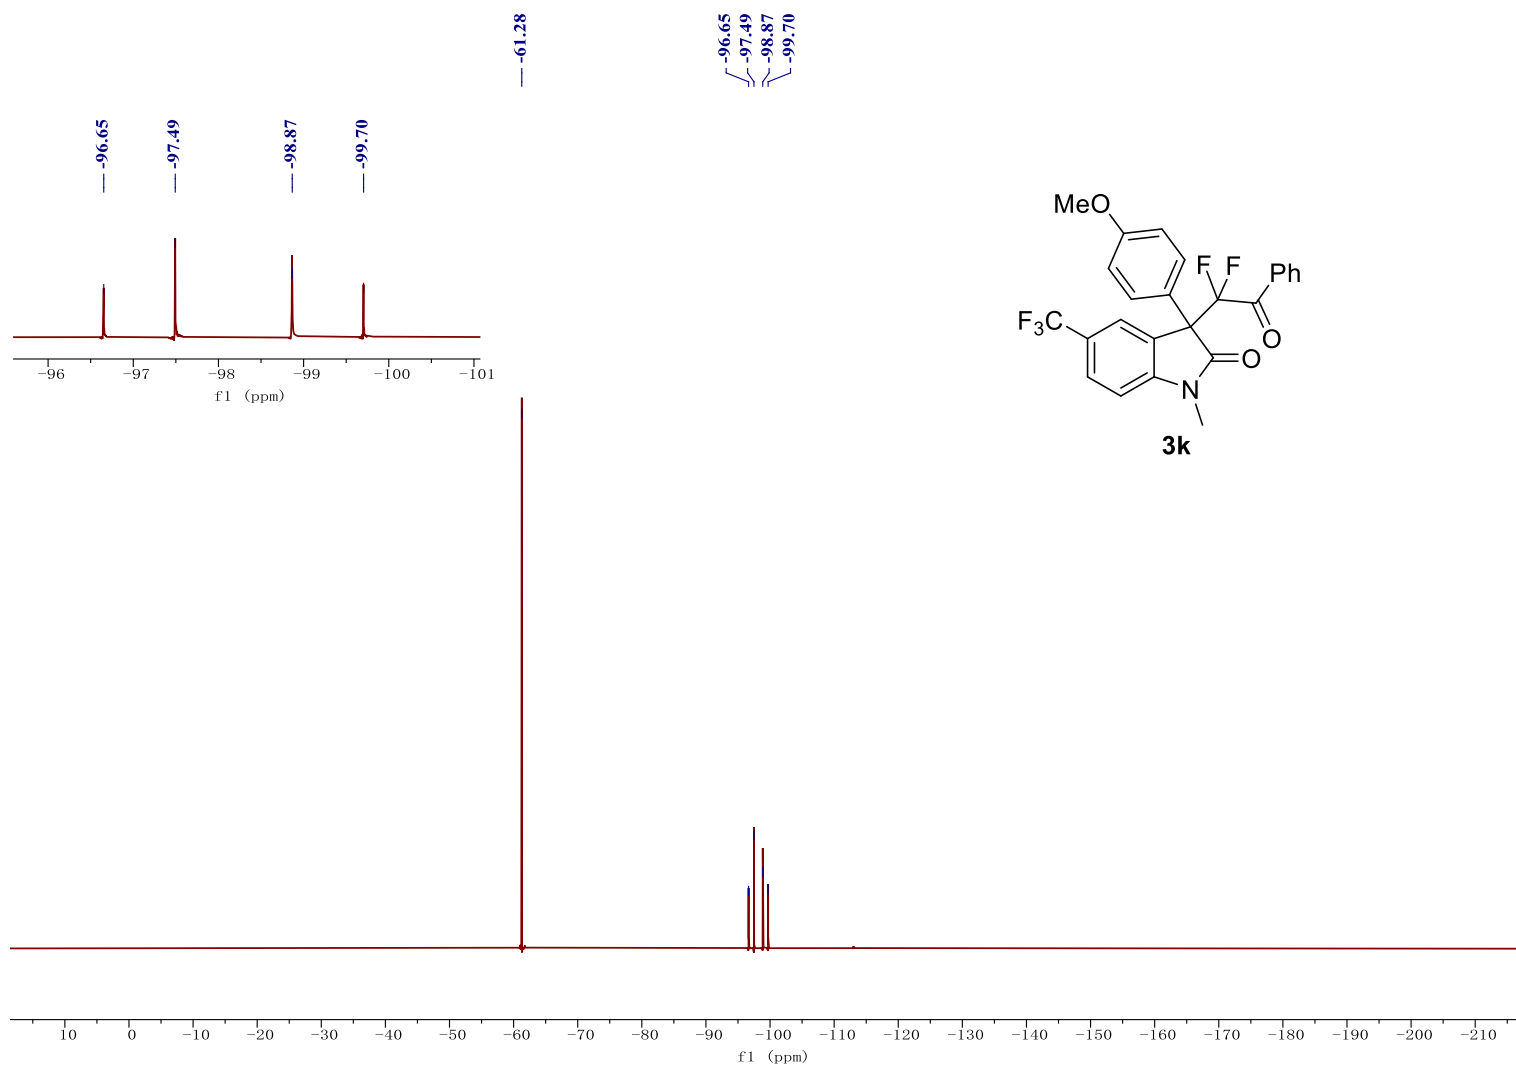

<sup>1</sup>H NMR of Compound 3l (400 MHz, CDCl<sub>3</sub>)

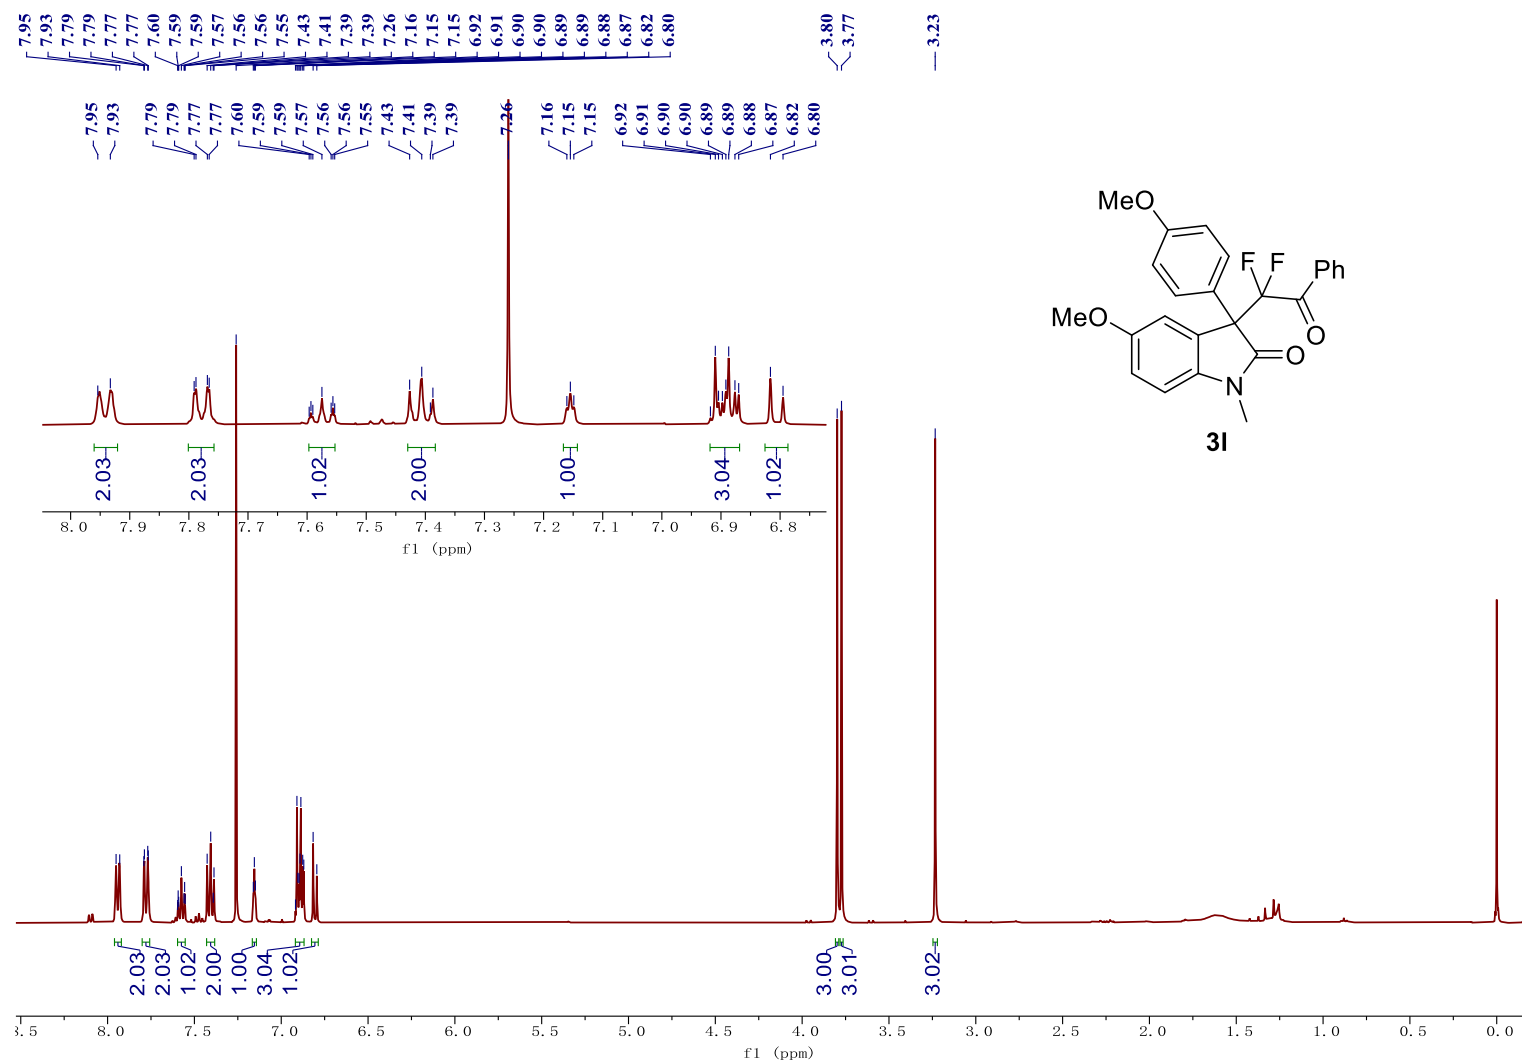

**$^{13}\text{C}$  NMR of Compound 3l (100 MHz,  $\text{CDCl}_3$ )**

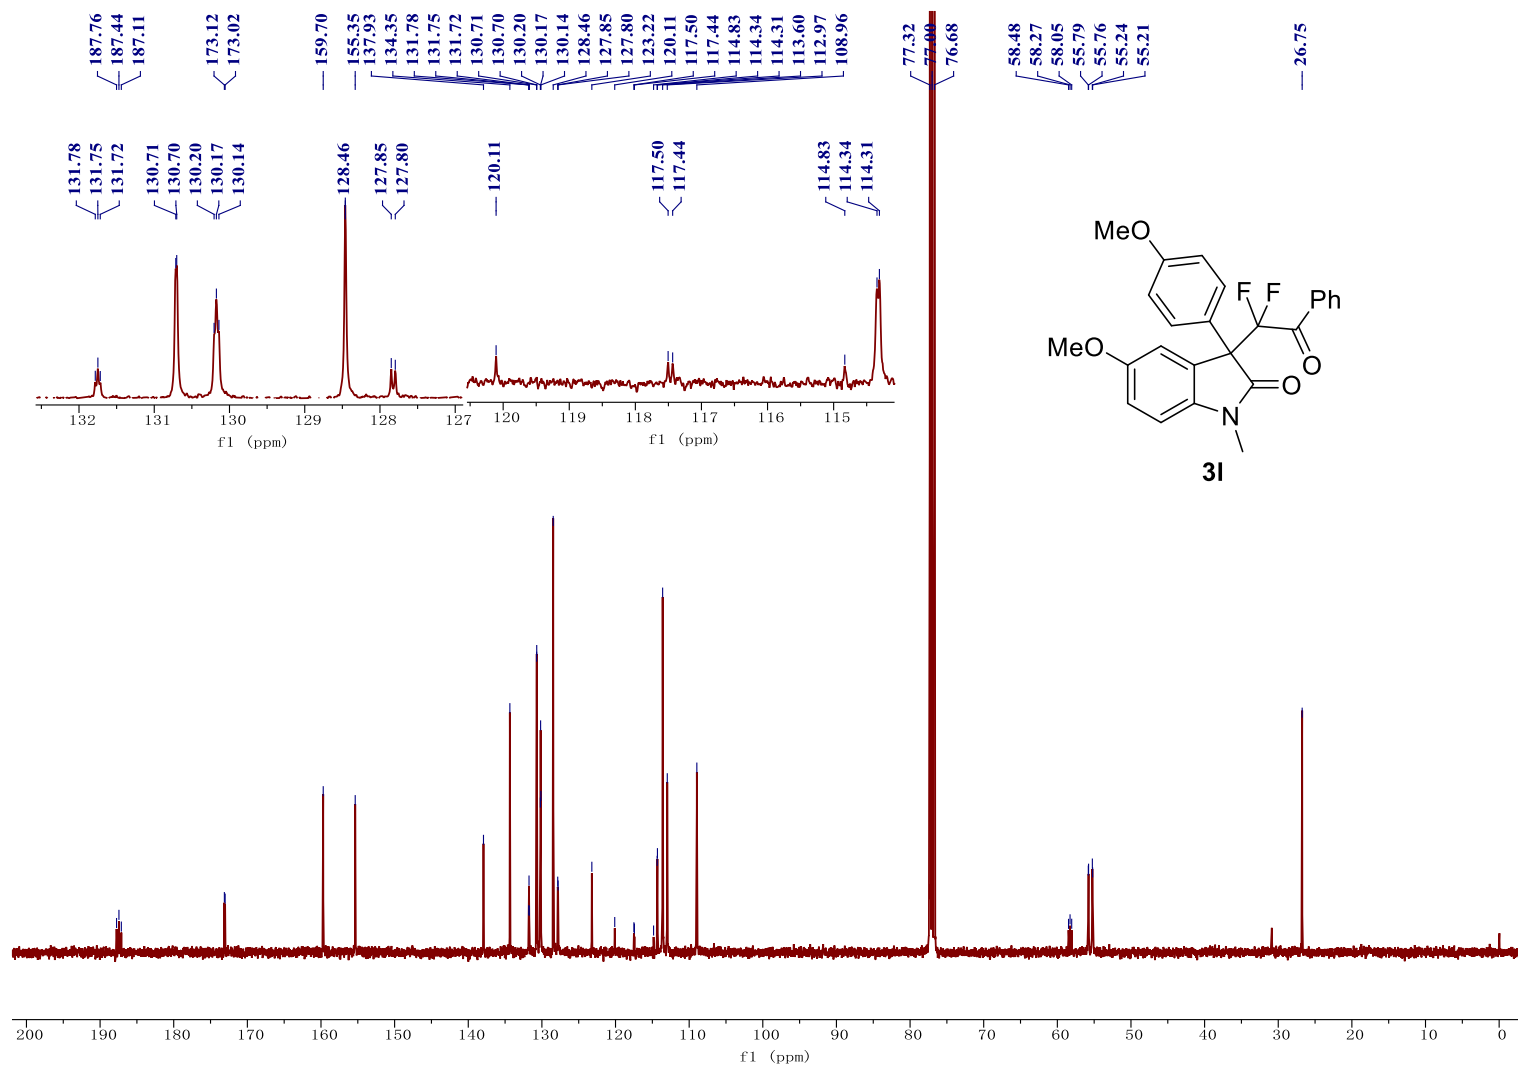

**$^{19}\text{F}$  NMR of Compound 3I (376 MHz,  $\text{CDCl}_3$ )**

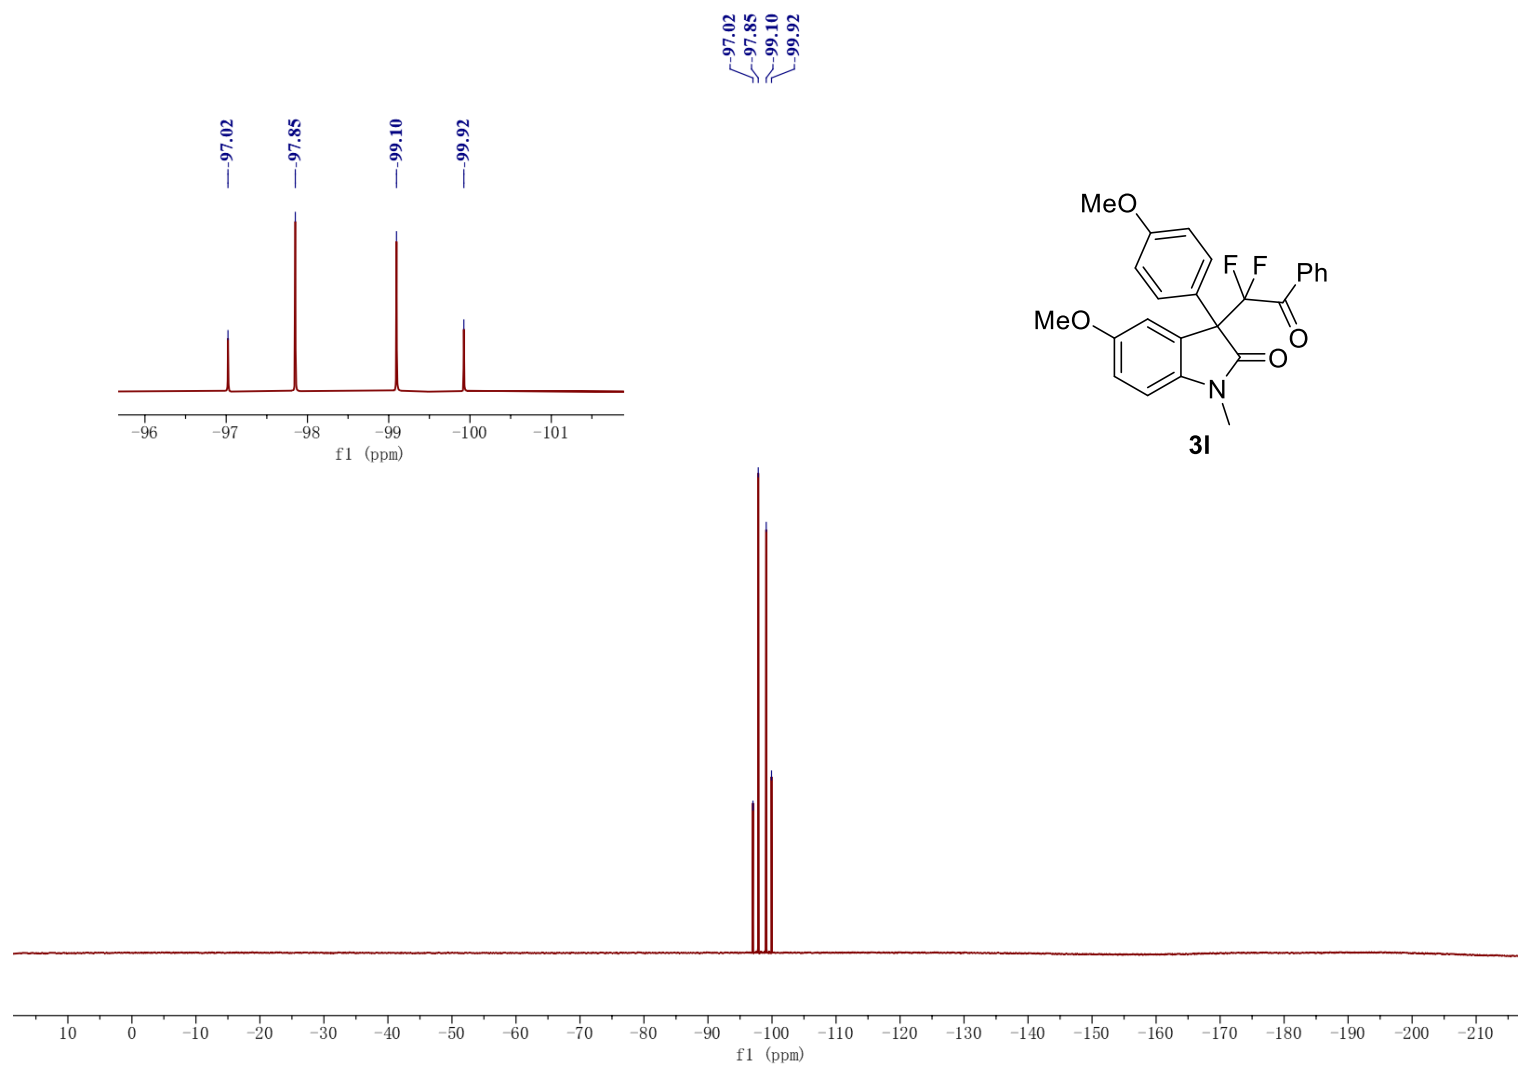

**$^1\text{H}$  NMR of Compound 3m (400 MHz,  $\text{CDCl}_3$ )**

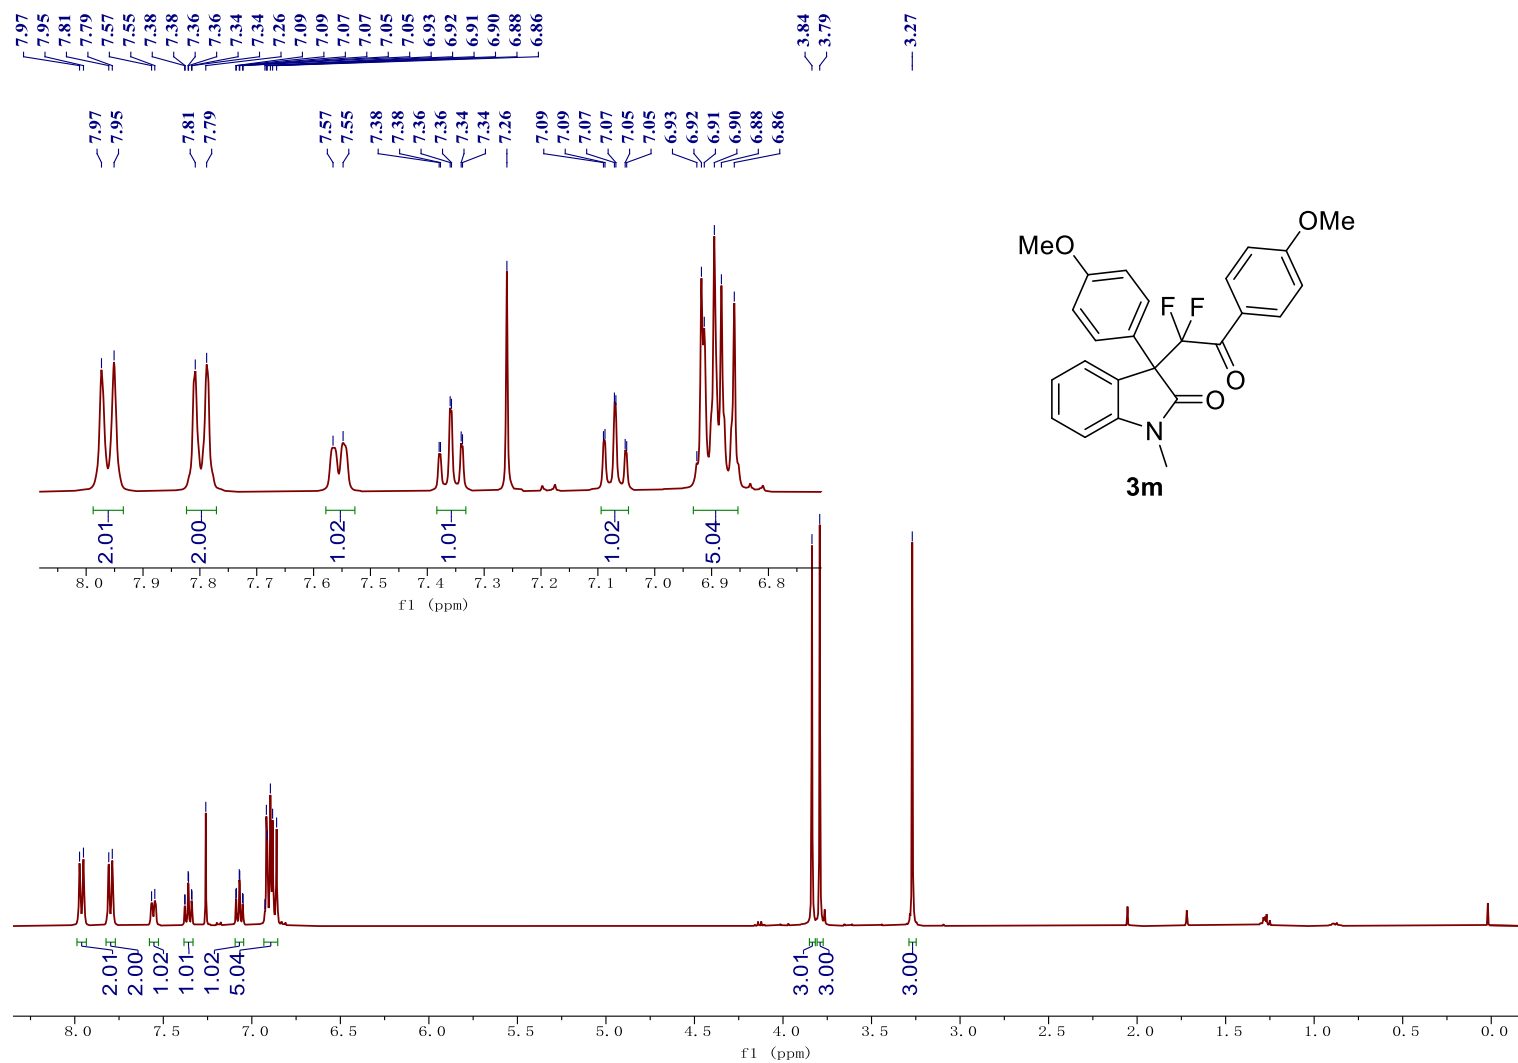



**$^{13}\text{C}$  NMR of Compound 3m (100 MHz,  $\text{CDCl}_3$ )**

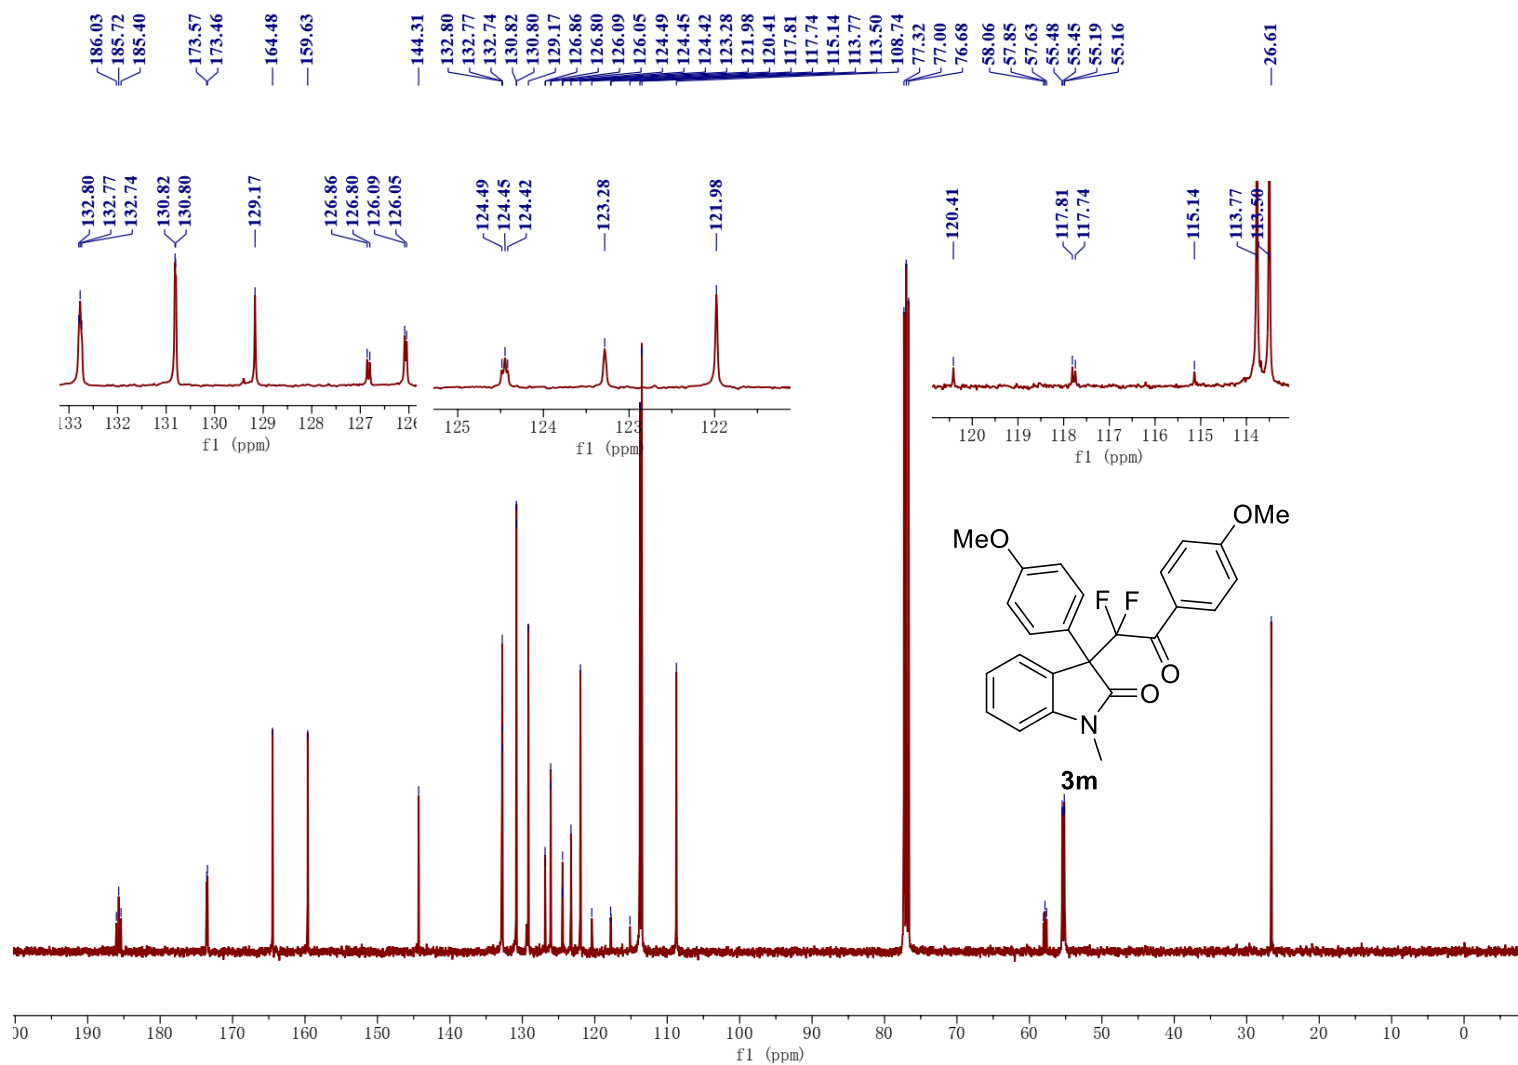

**$^{19}\text{F}$  NMR of Compound 3m (376 MHz,  $\text{CDCl}_3$ )**

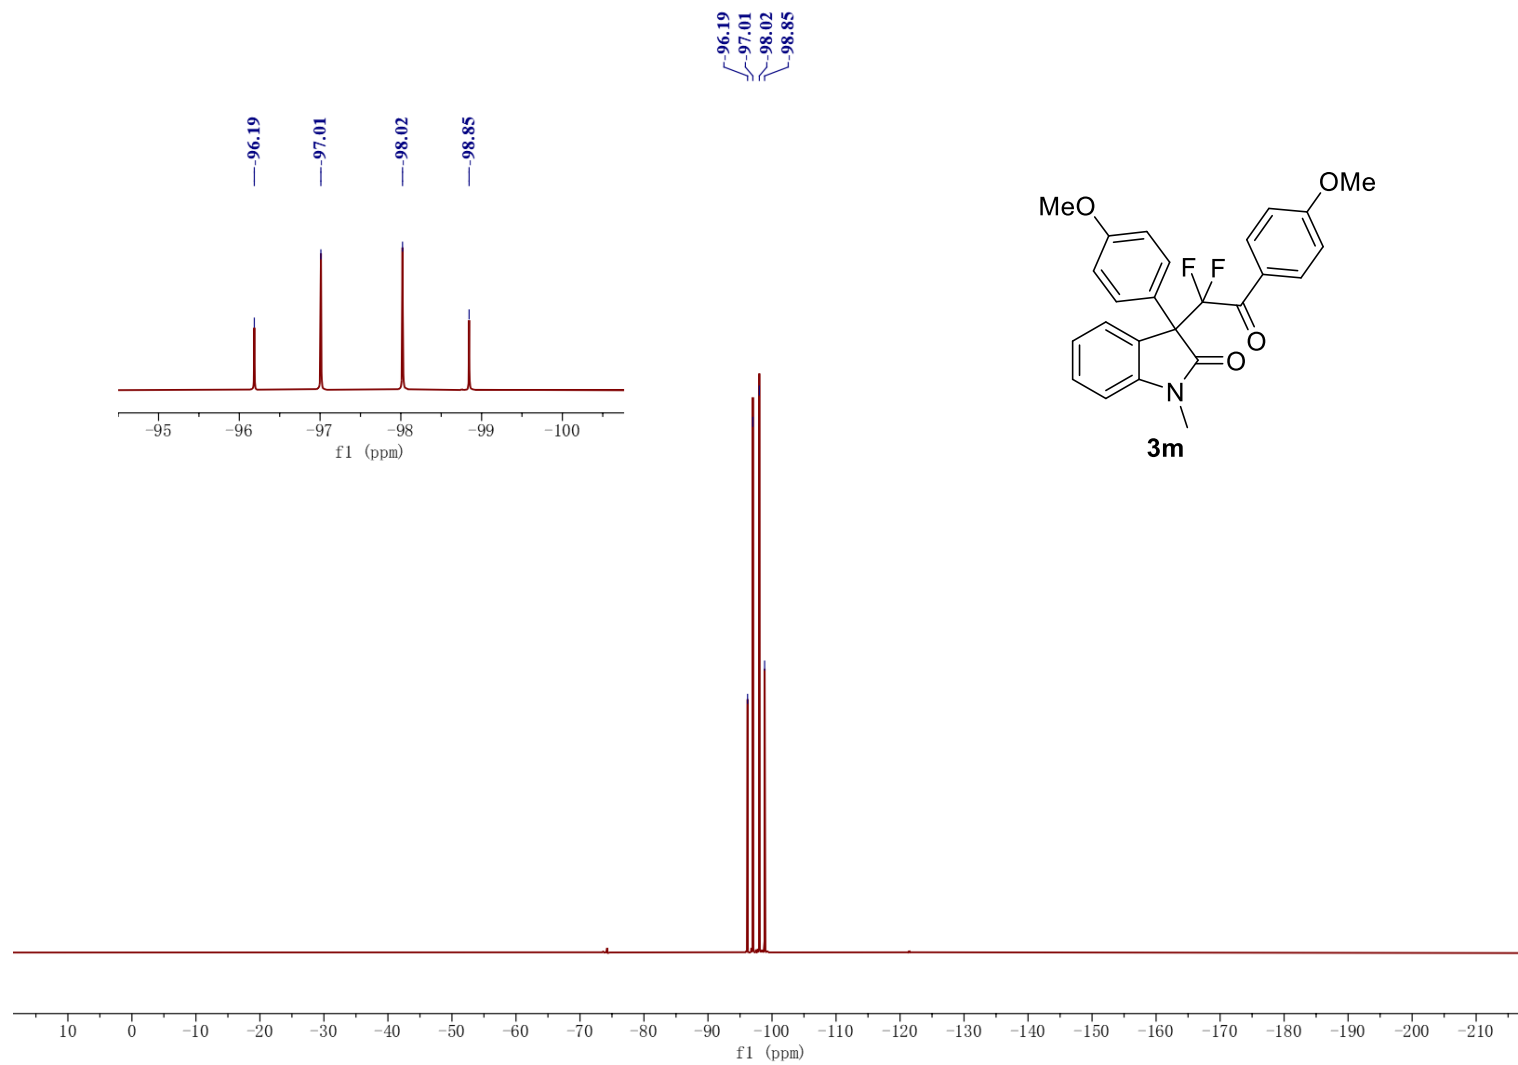

**<sup>1</sup>H NMR of Compound 3n (400 MHz, CDCl<sub>3</sub>)**

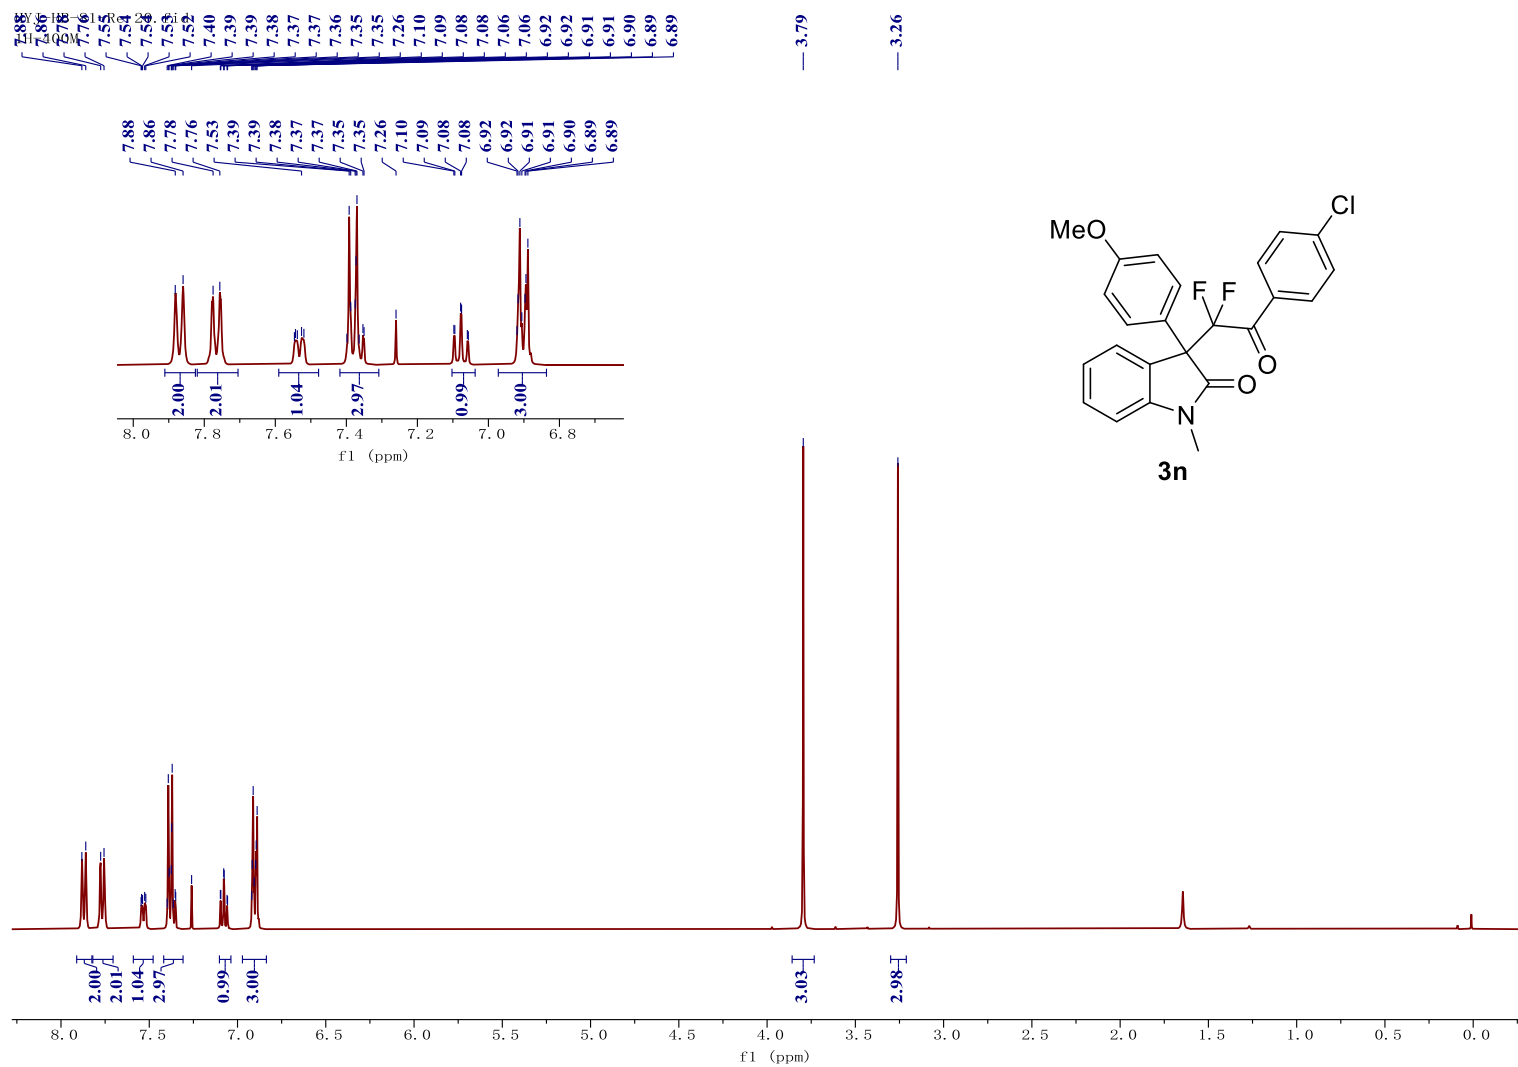

# <sup>13</sup>C NMR of Compound 3n (125 MHz, CDCl<sub>3</sub>)

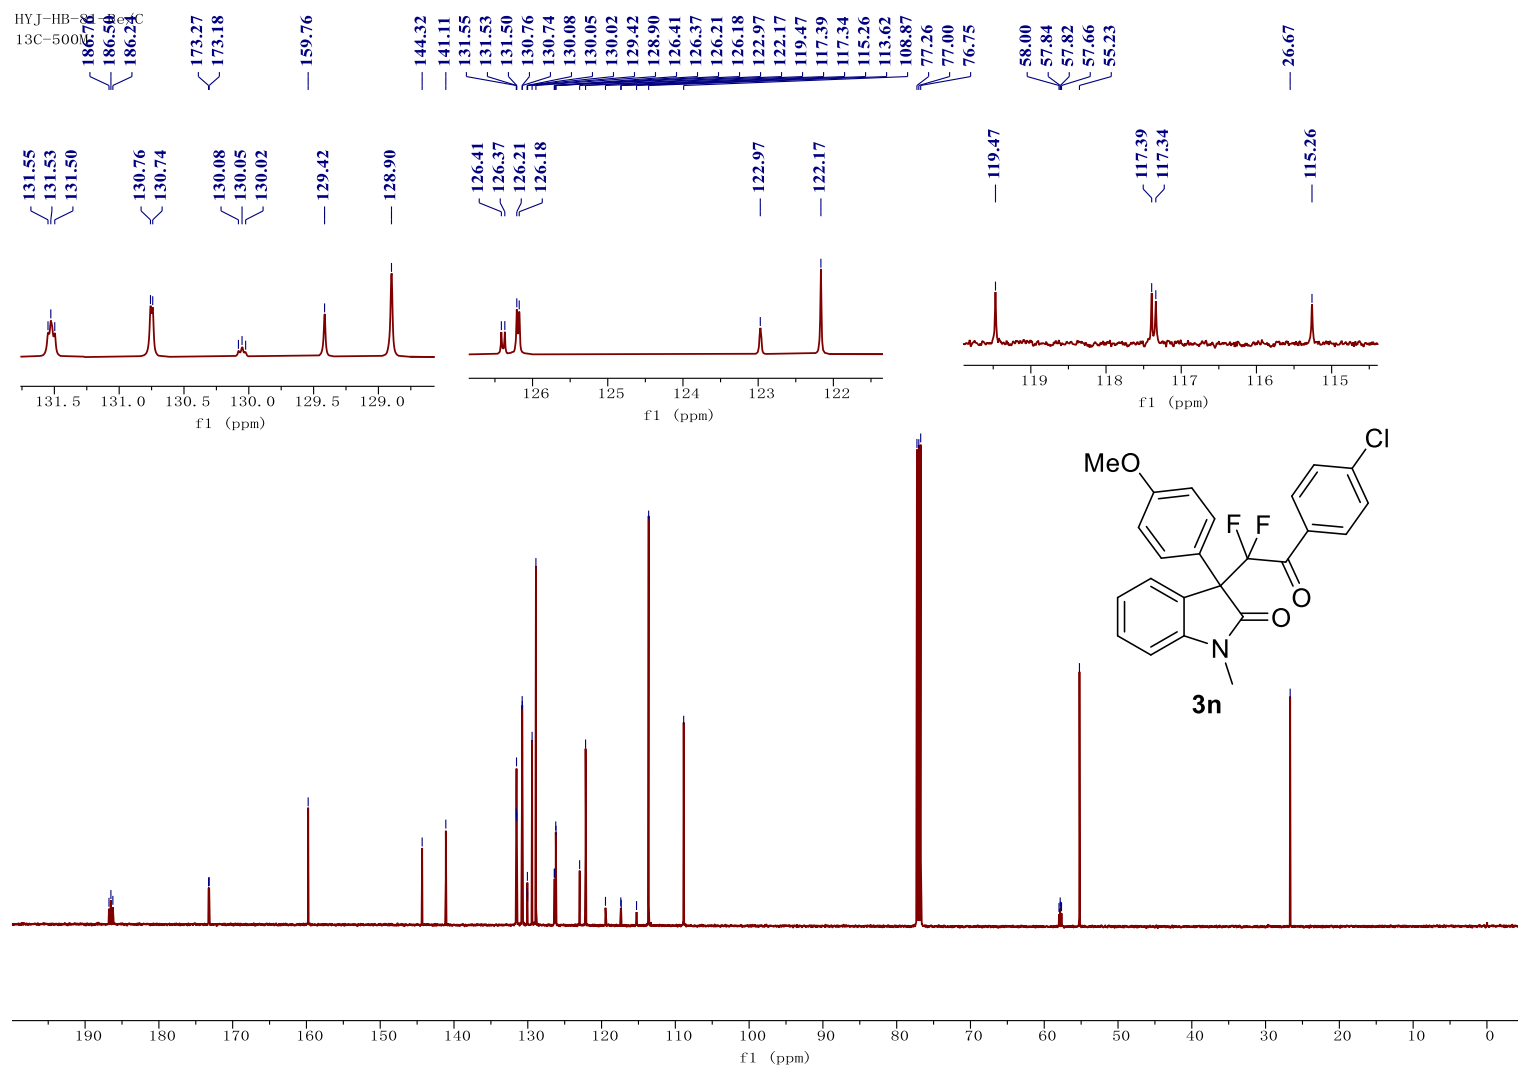

**$^{19}\text{F}$  NMR of Compound 3n (376 MHz,  $\text{CDCl}_3$ )**

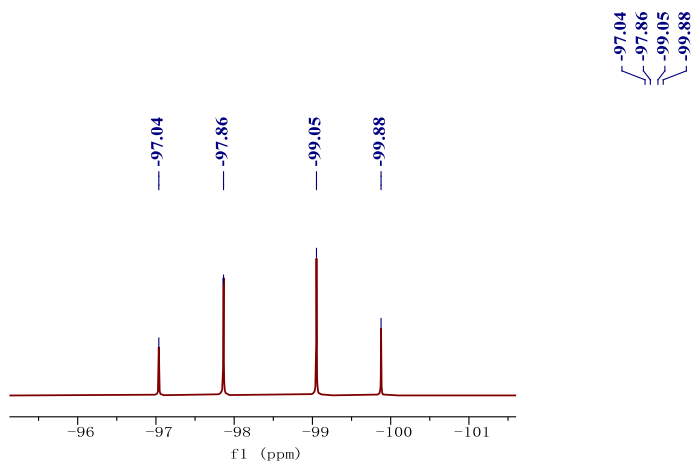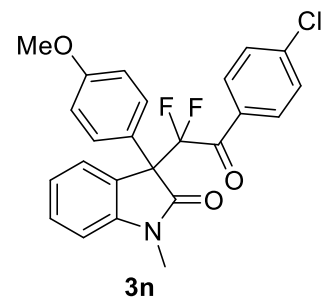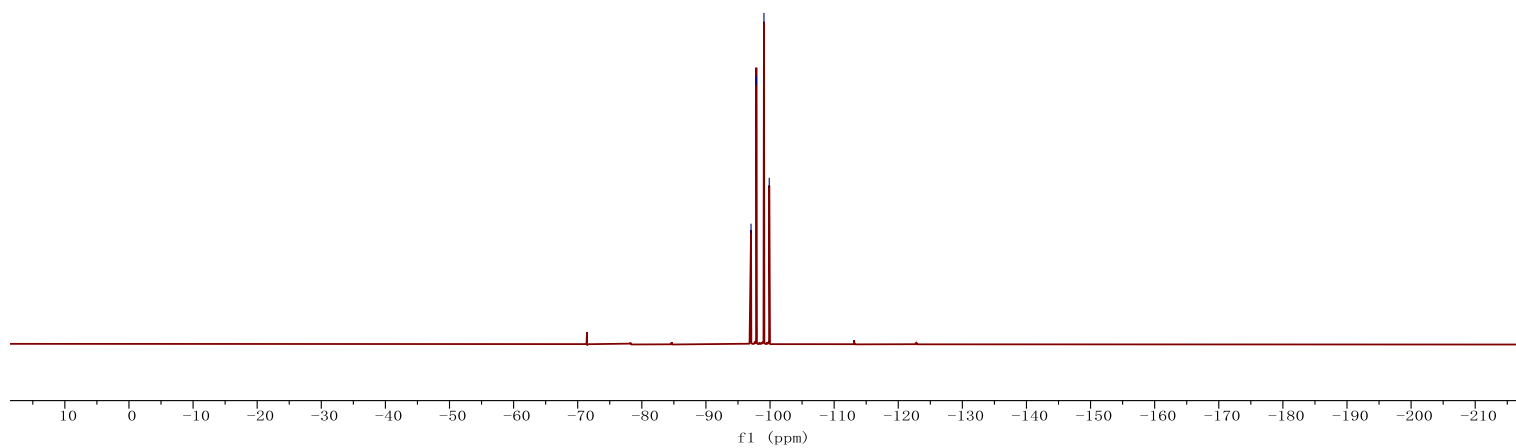

**$^1\text{H}$  NMR of Compound 3o (400 MHz,  $\text{CDCl}_3$ )**

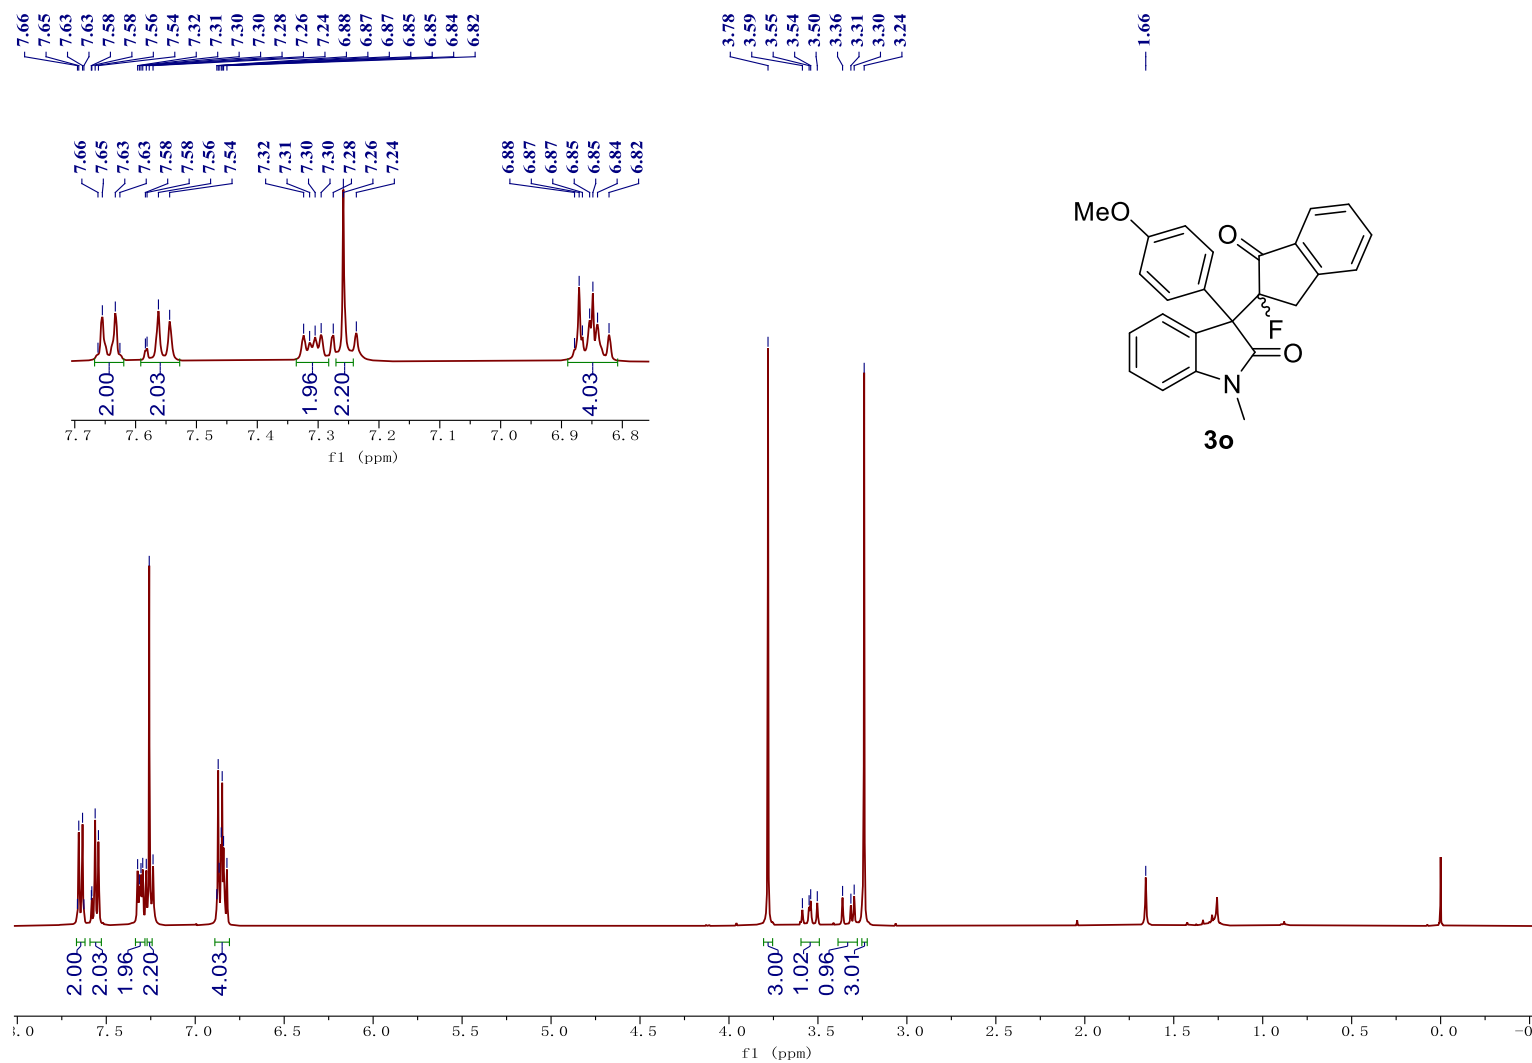

**$^{13}\text{C}$  NMR of Compound 3o (100 MHz,  $\text{CDCl}_3$ )**

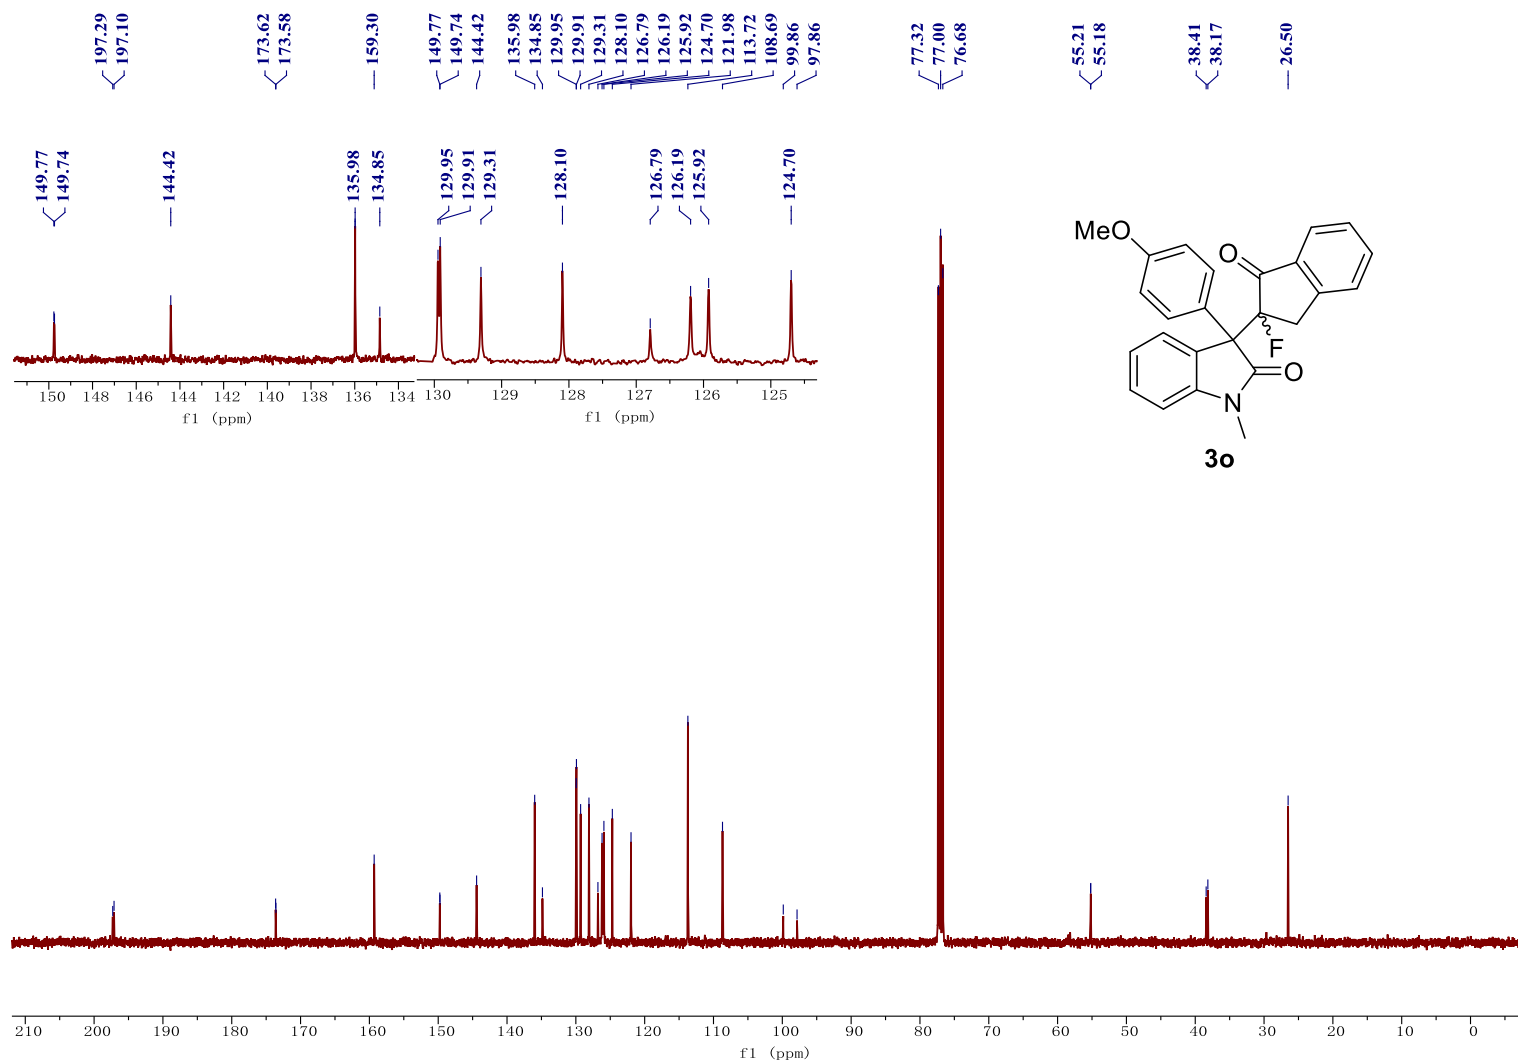

**$^{19}\text{F}$  NMR of Compound 3o (376 MHz,  $\text{CDCl}_3$ )**

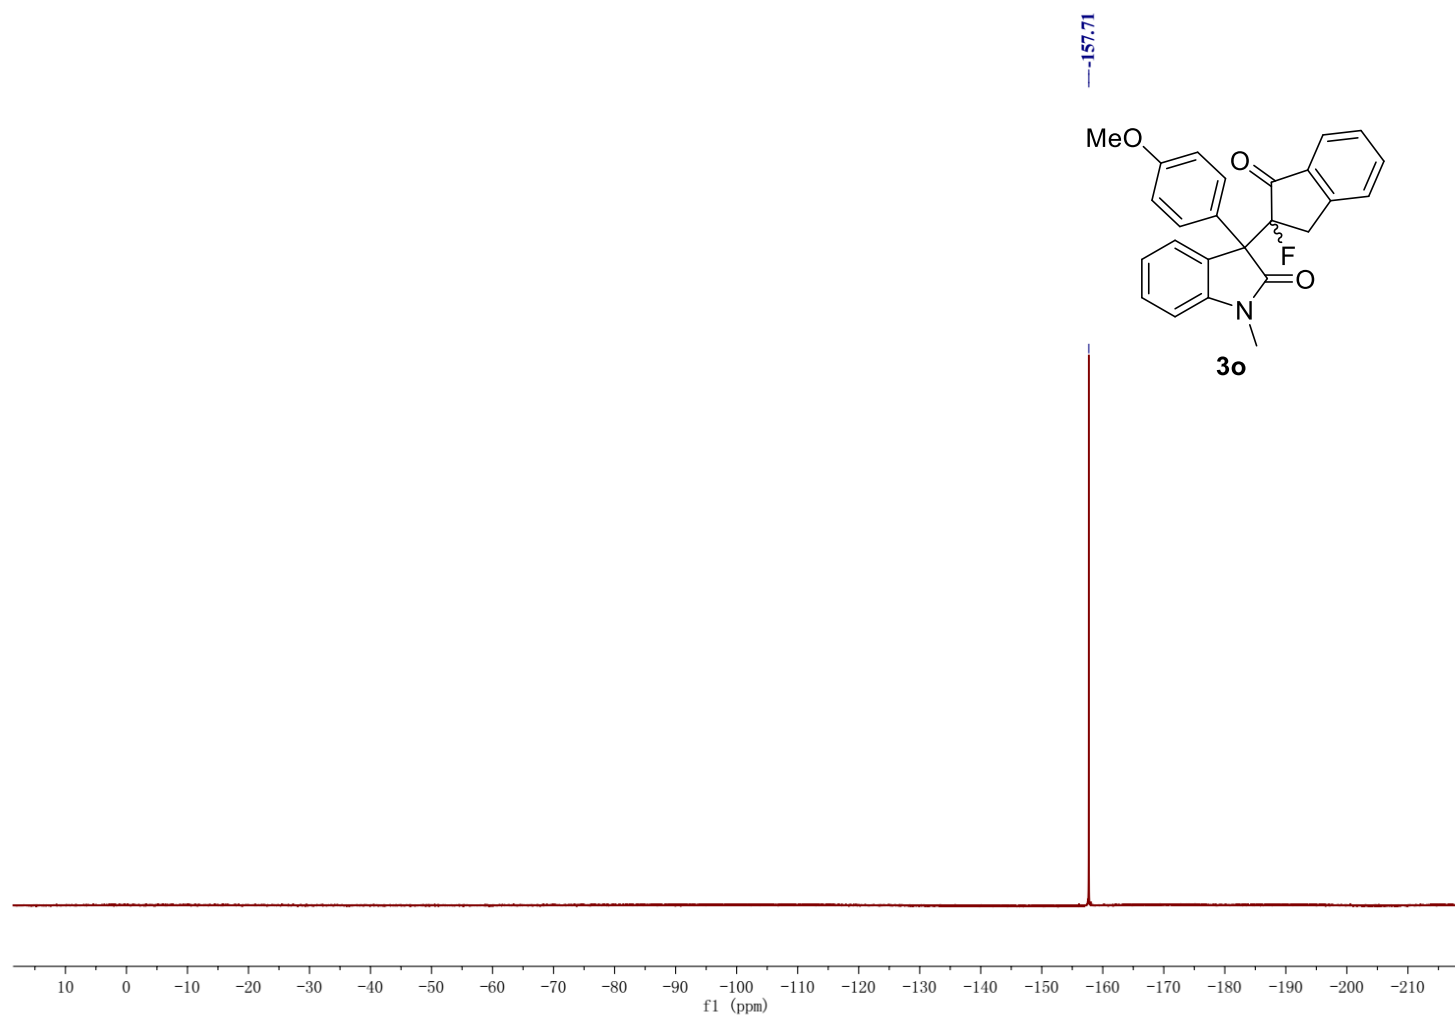



# <sup>1</sup>H NMR of Compound 3p (400 MHz, CDCl<sub>3</sub>)

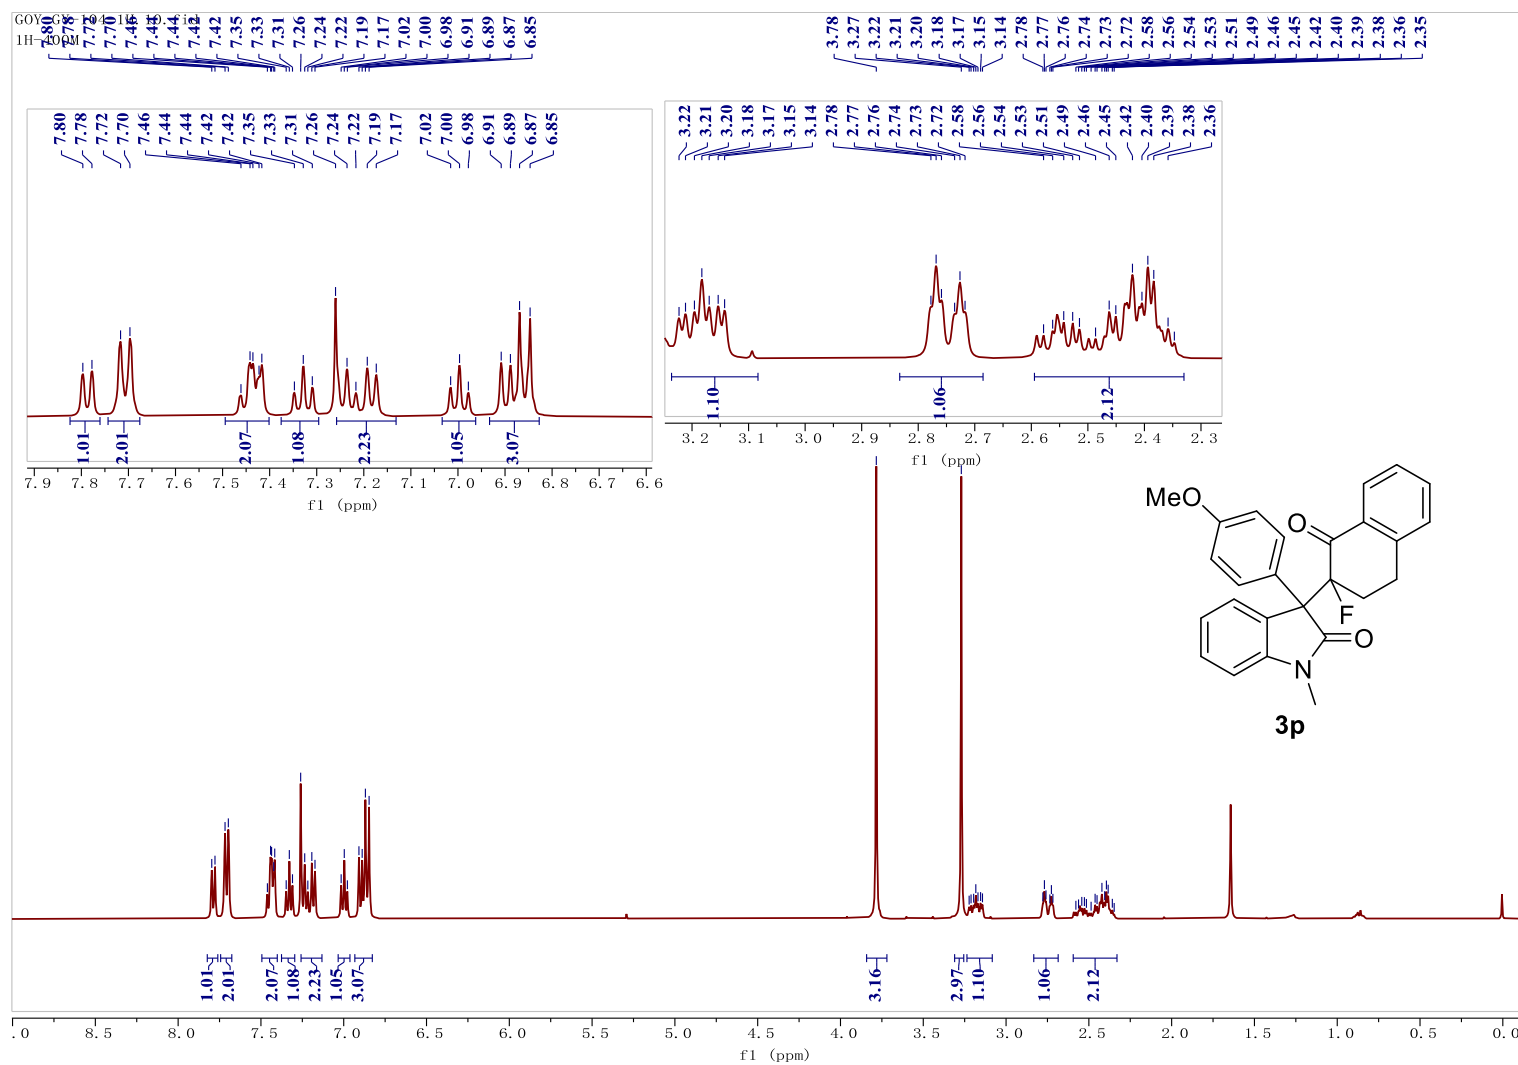

# <sup>13</sup>C NMR of Compound 3p (100 MHz, CDCl<sub>3</sub>)

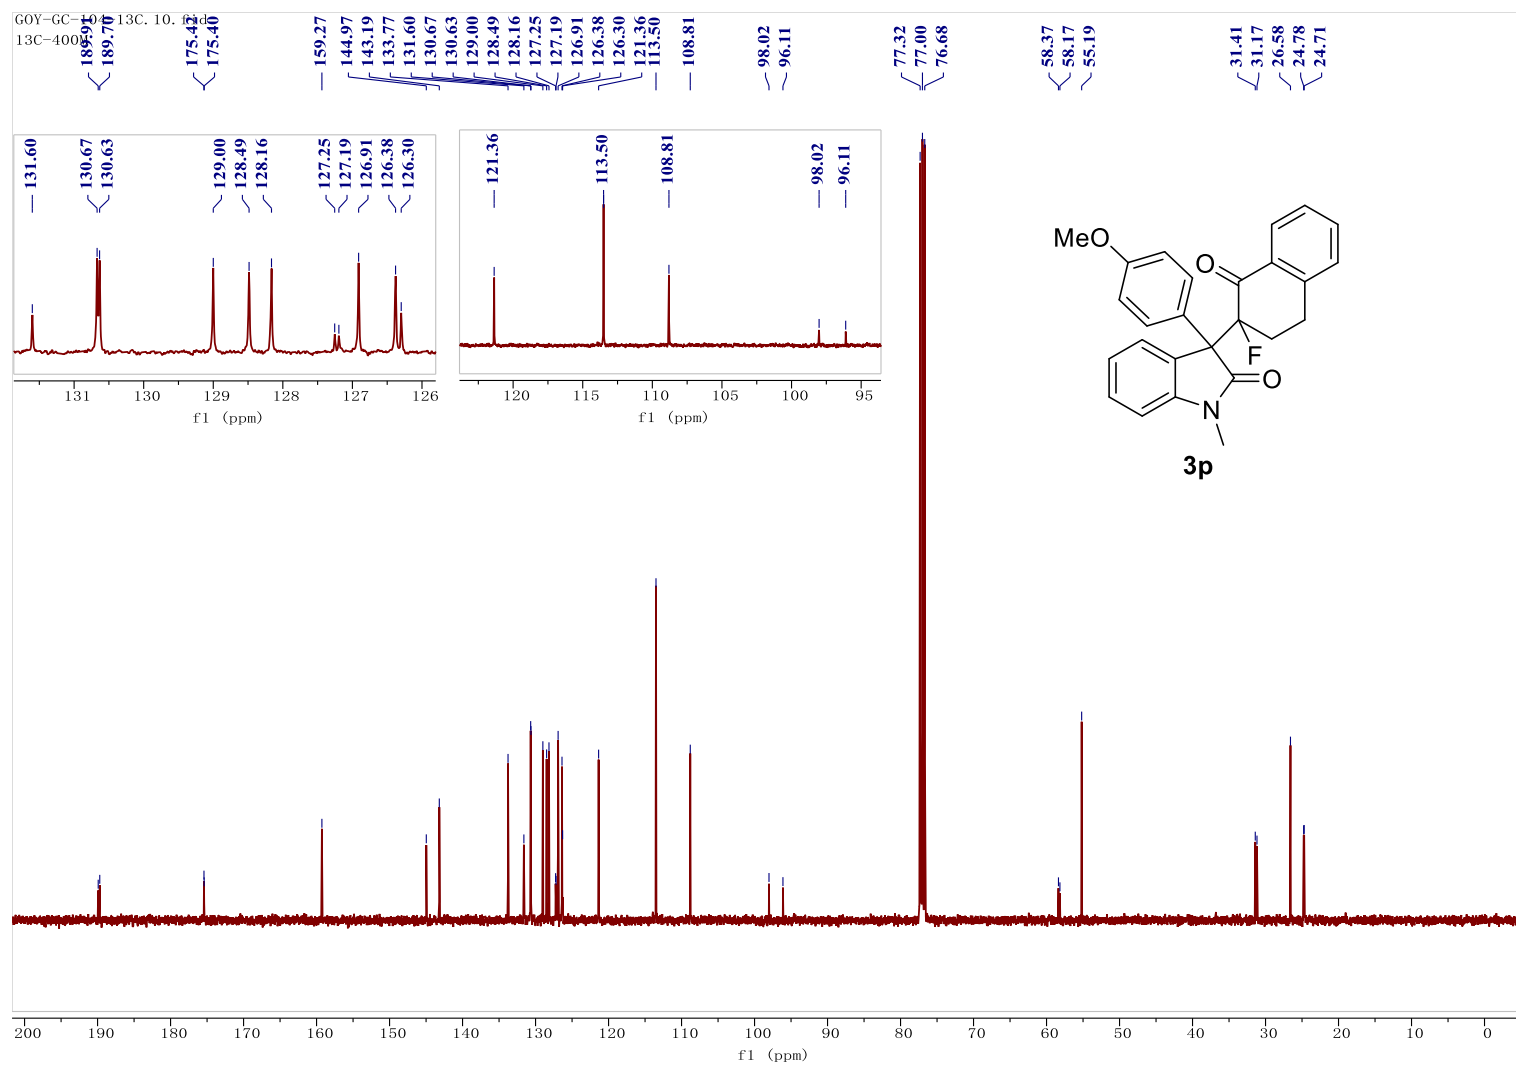

**$^{19}\text{F}$  NMR of Compound 3p (376 MHz,  $\text{CDCl}_3$ )**

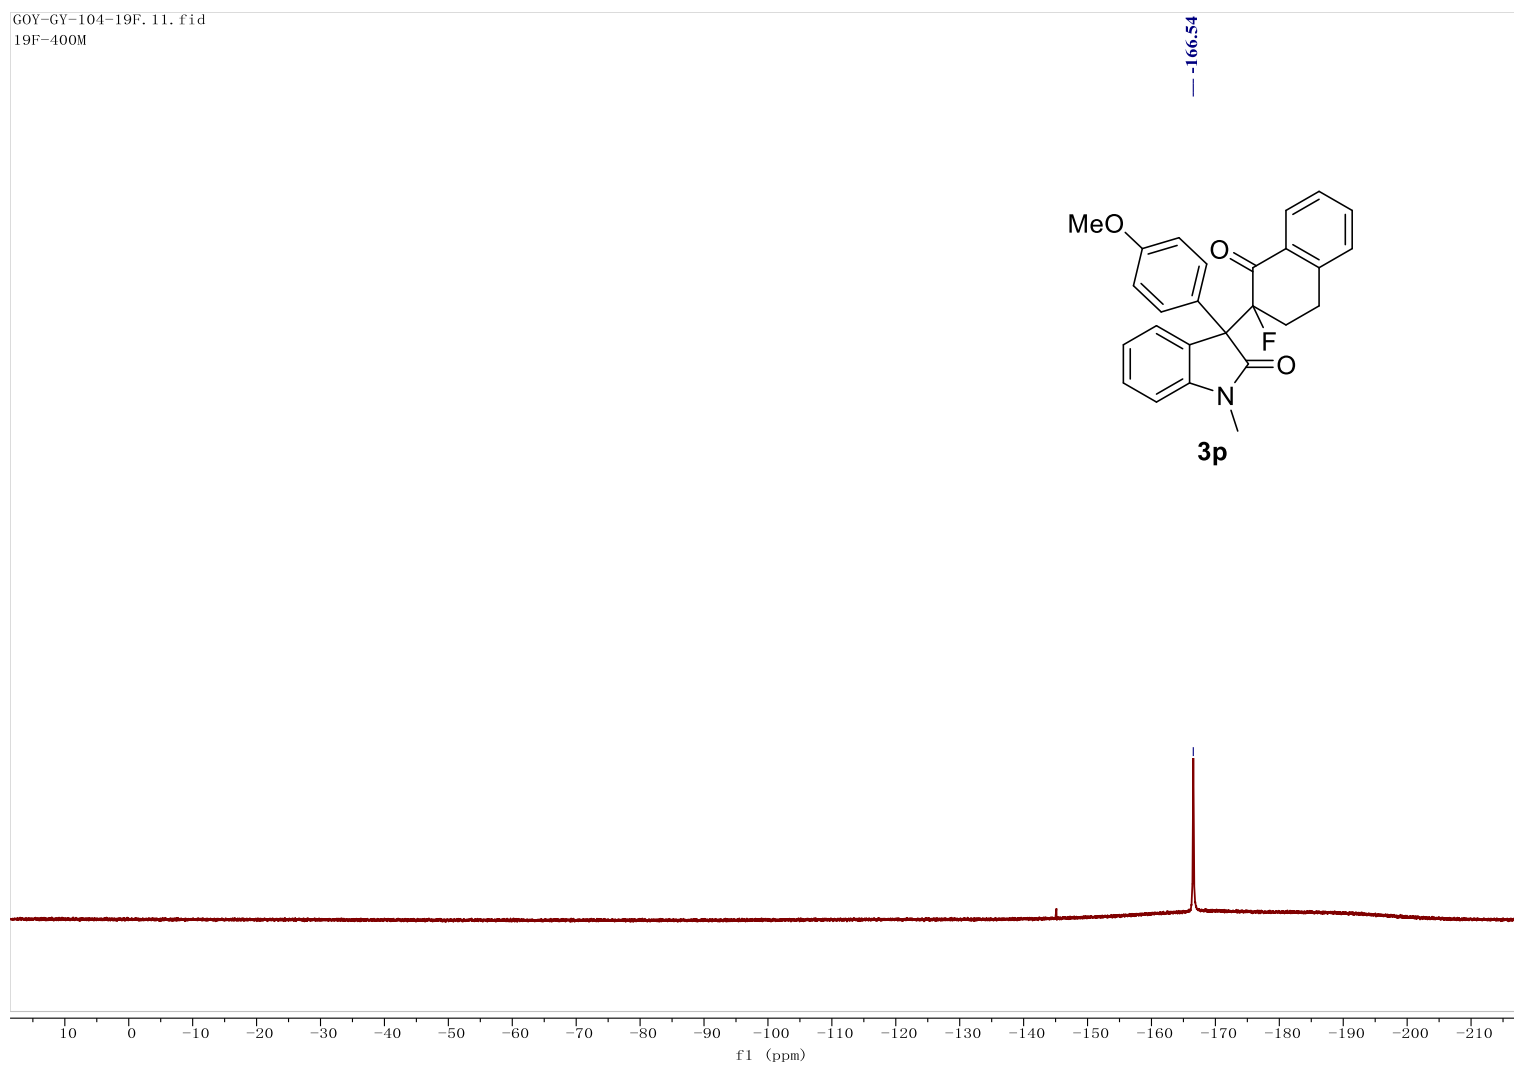

**$^1\text{H}$  NMR of Compound 5a (400 MHz,  $\text{CDCl}_3$ )**

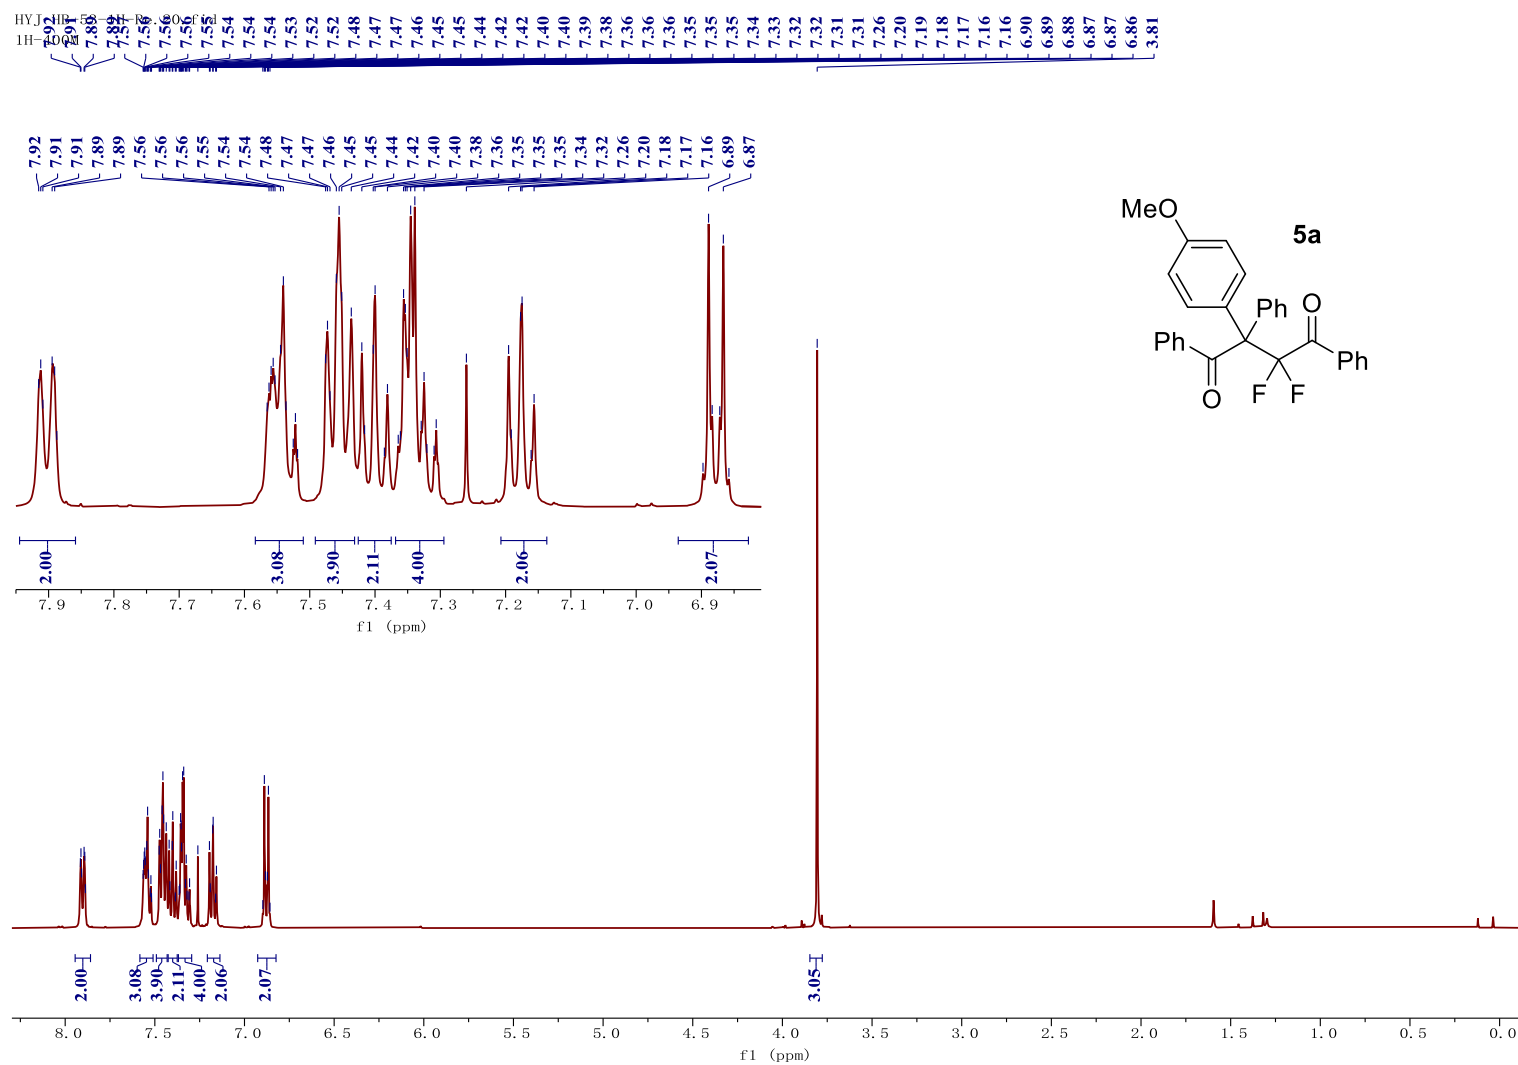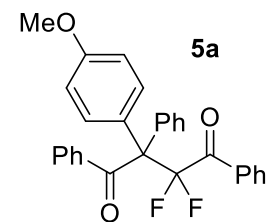

# <sup>13</sup>C NMR of Compound 5a (100 MHz, CDCl<sub>3</sub>)

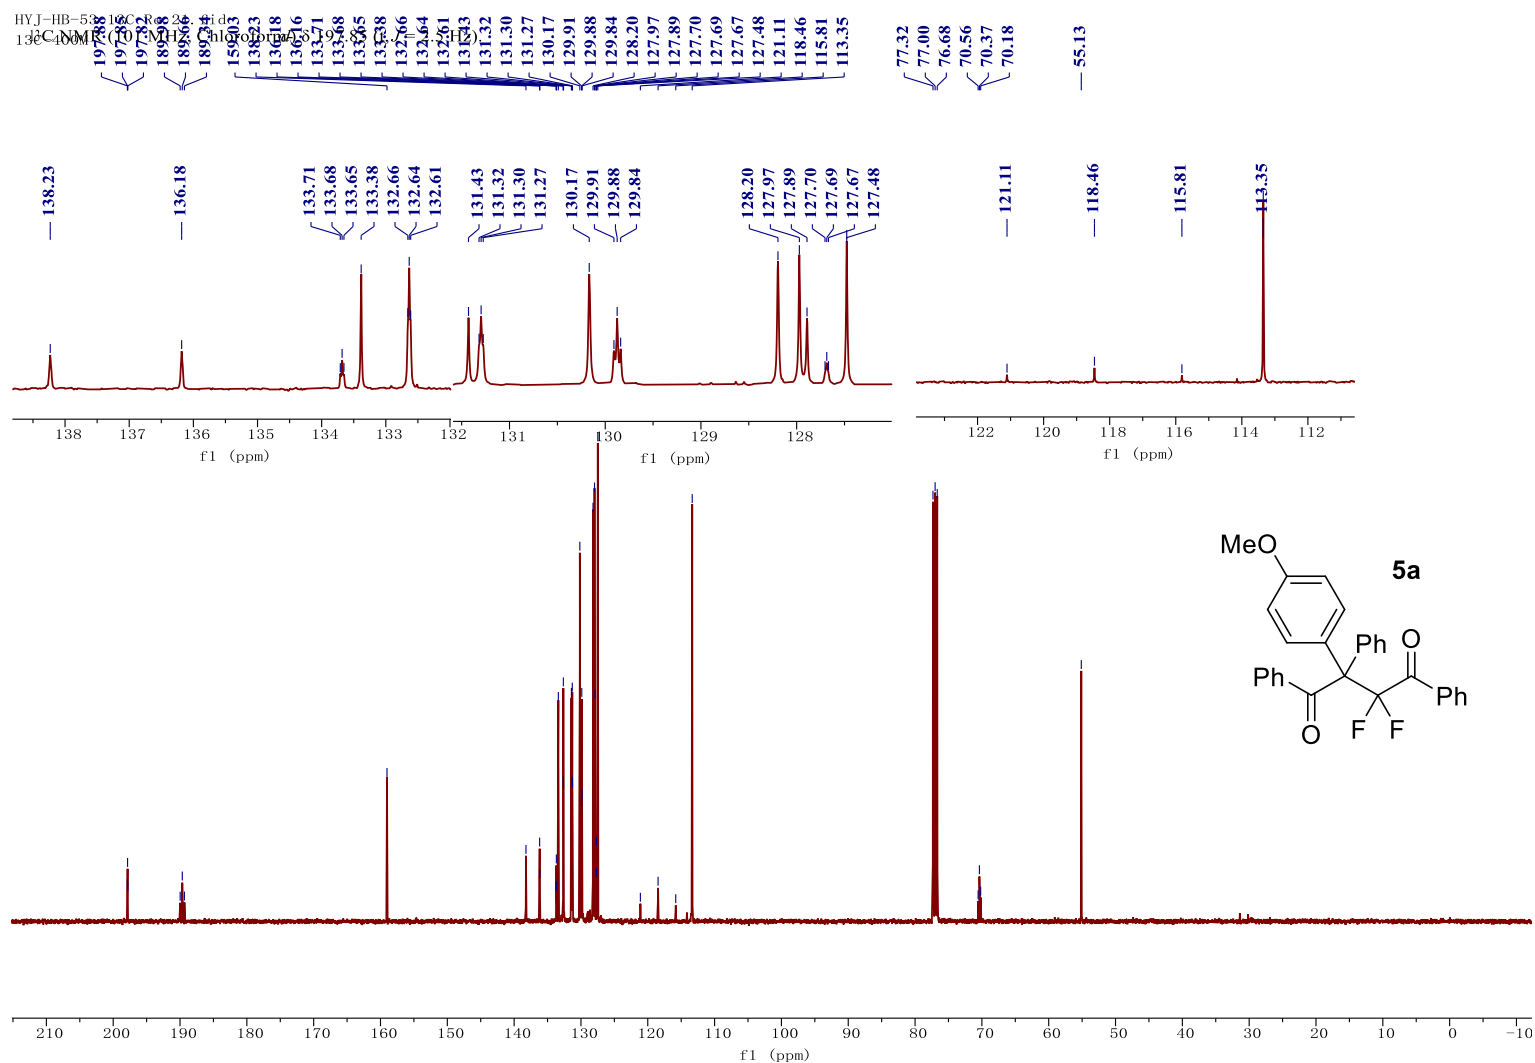

# <sup>19</sup>F NMR of Compound 5a (376 MHz, CDCl<sub>3</sub>)

HYJ-HB-53-19F-Re. 22. fid  
19F-400M

— -94.29

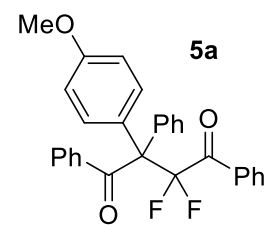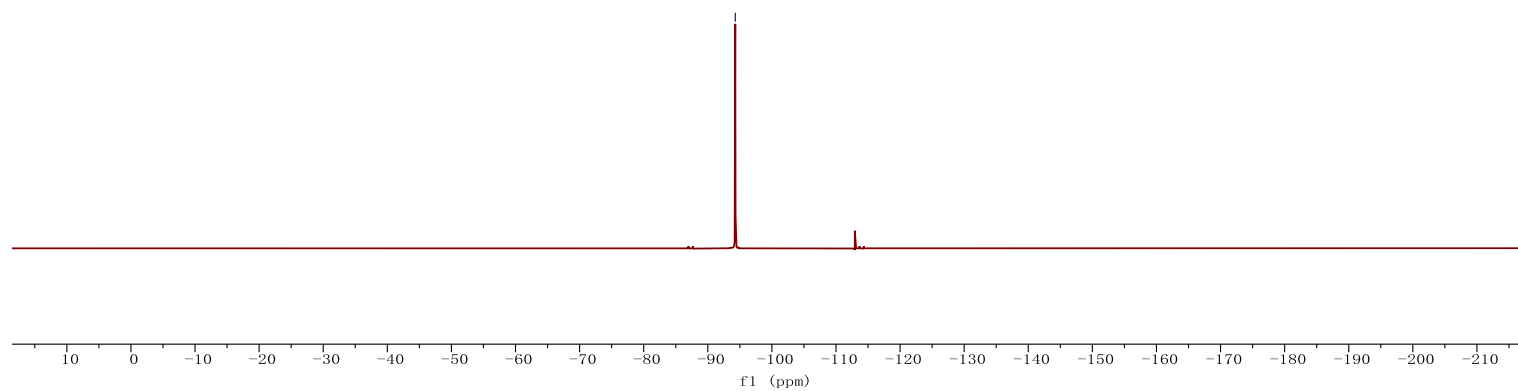

**$^1\text{H}$  NMR of Compound 5b (400 MHz,  $\text{CDCl}_3$ )**

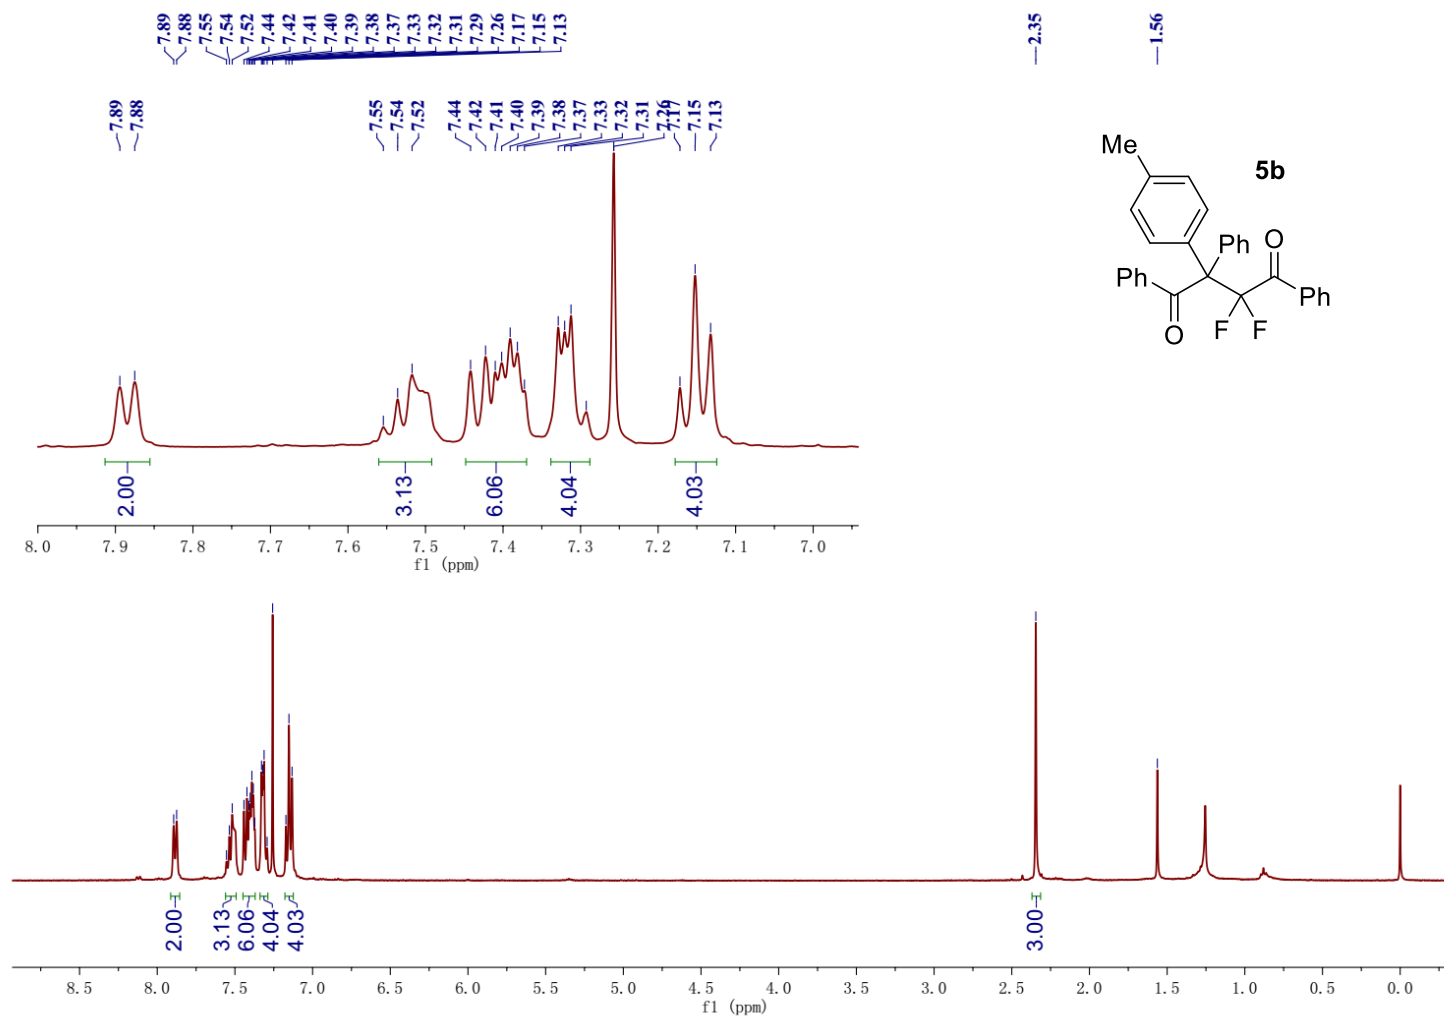

**$^{13}\text{C}$  NMR of Compound 5b (100 MHz,  $\text{CDCl}_3$ )**

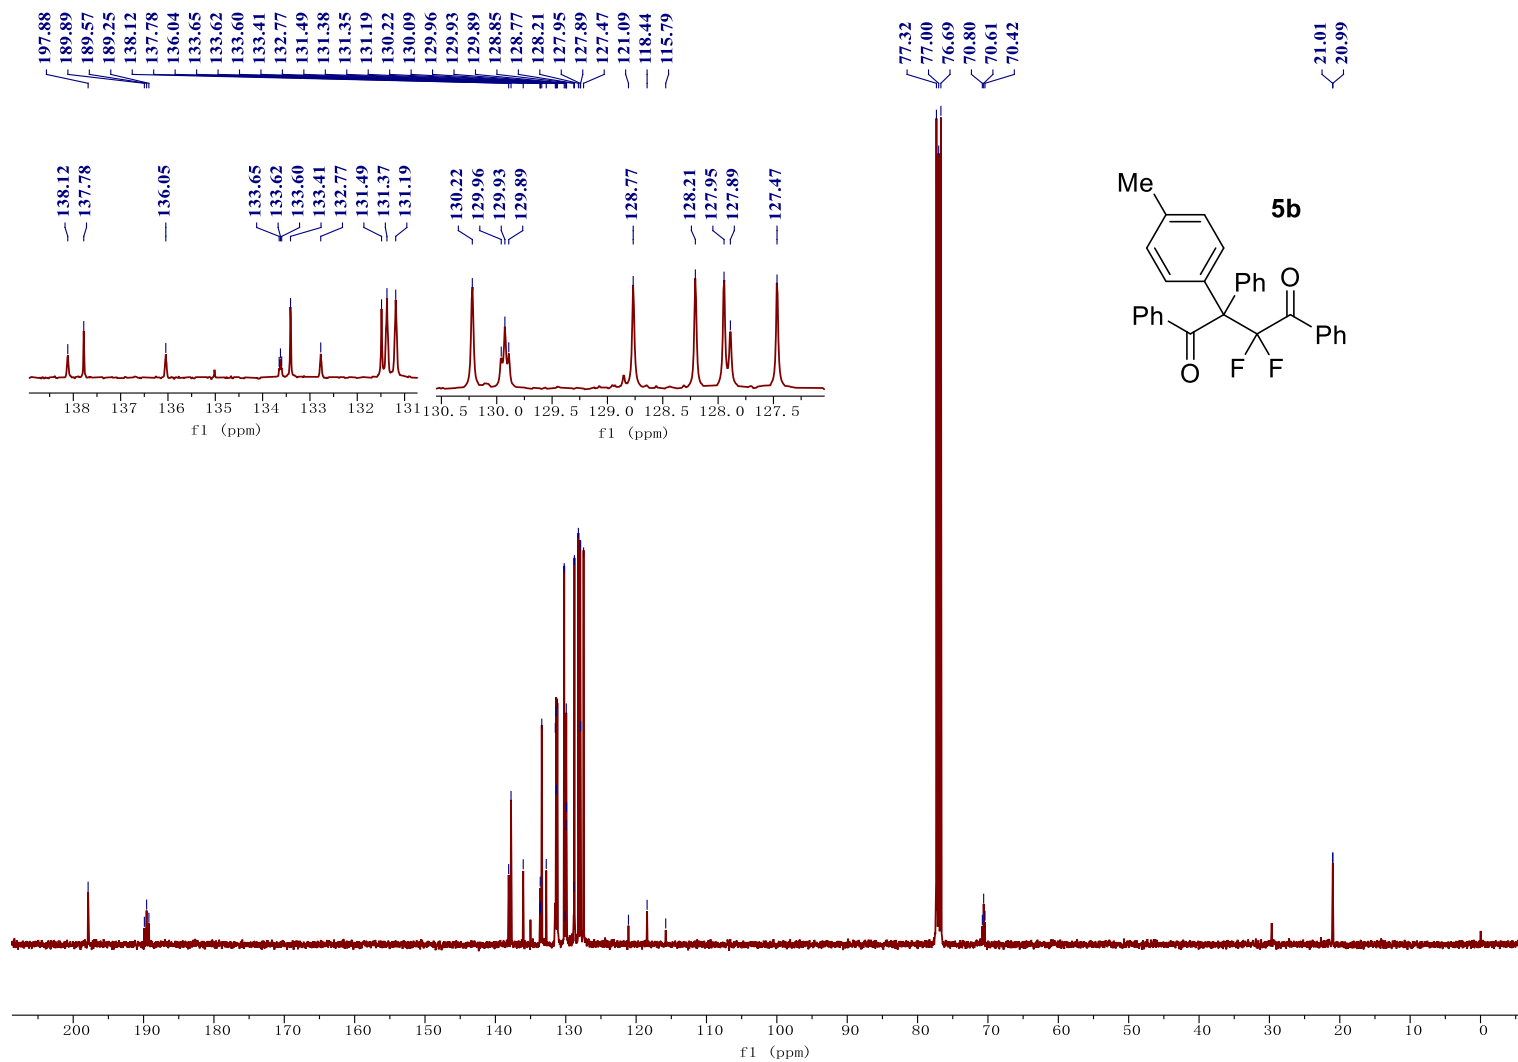



**$^{19}\text{F}$  NMR of Compound 5b (376 MHz,  $\text{CDCl}_3$ )**

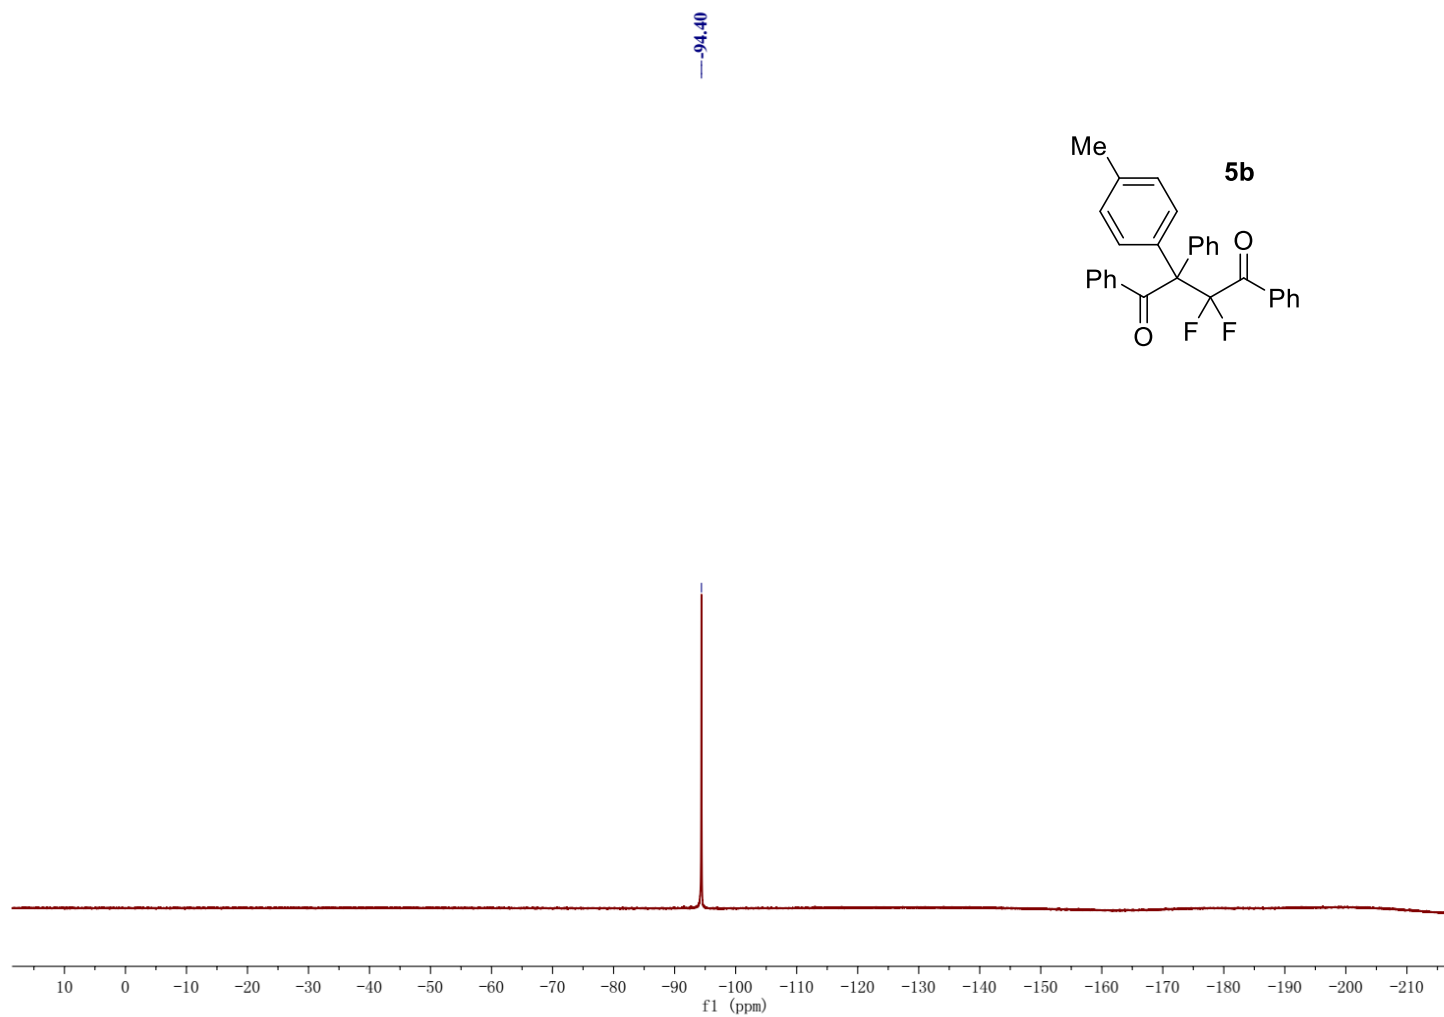

**$^1\text{H}$  NMR of Compound 5c (400 MHz,  $\text{CDCl}_3$ )**

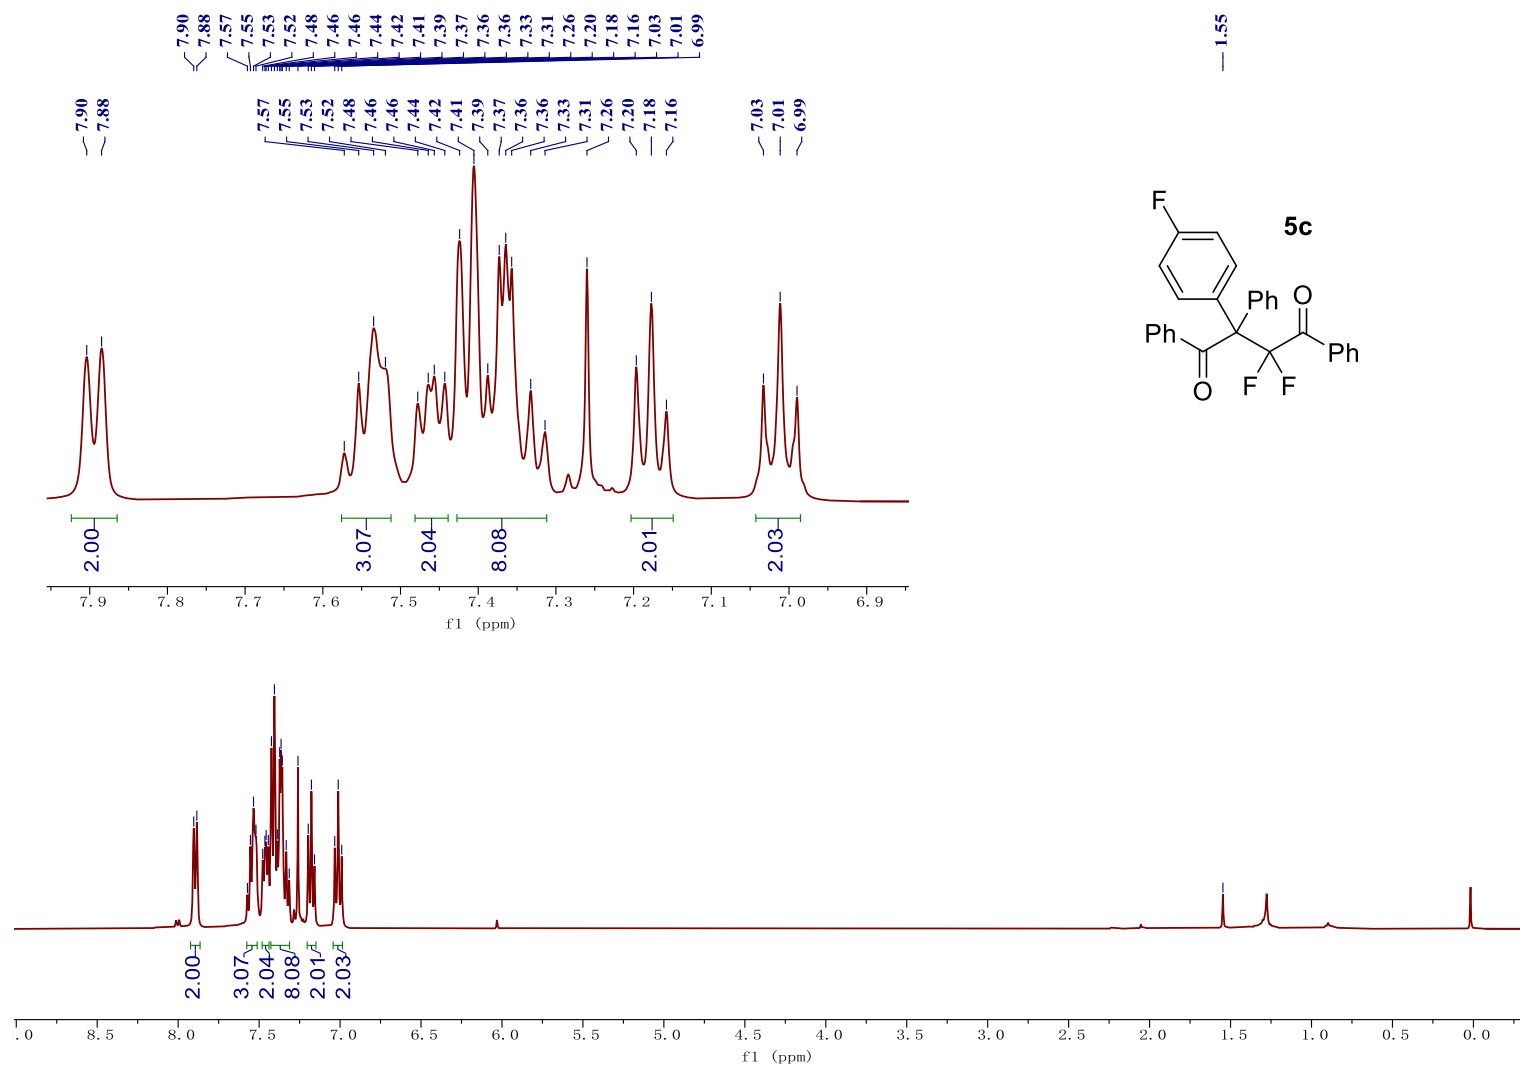

**$^{13}\text{C}$  NMR of Compound 5c (100 MHz,  $\text{CDCl}_3$ )**

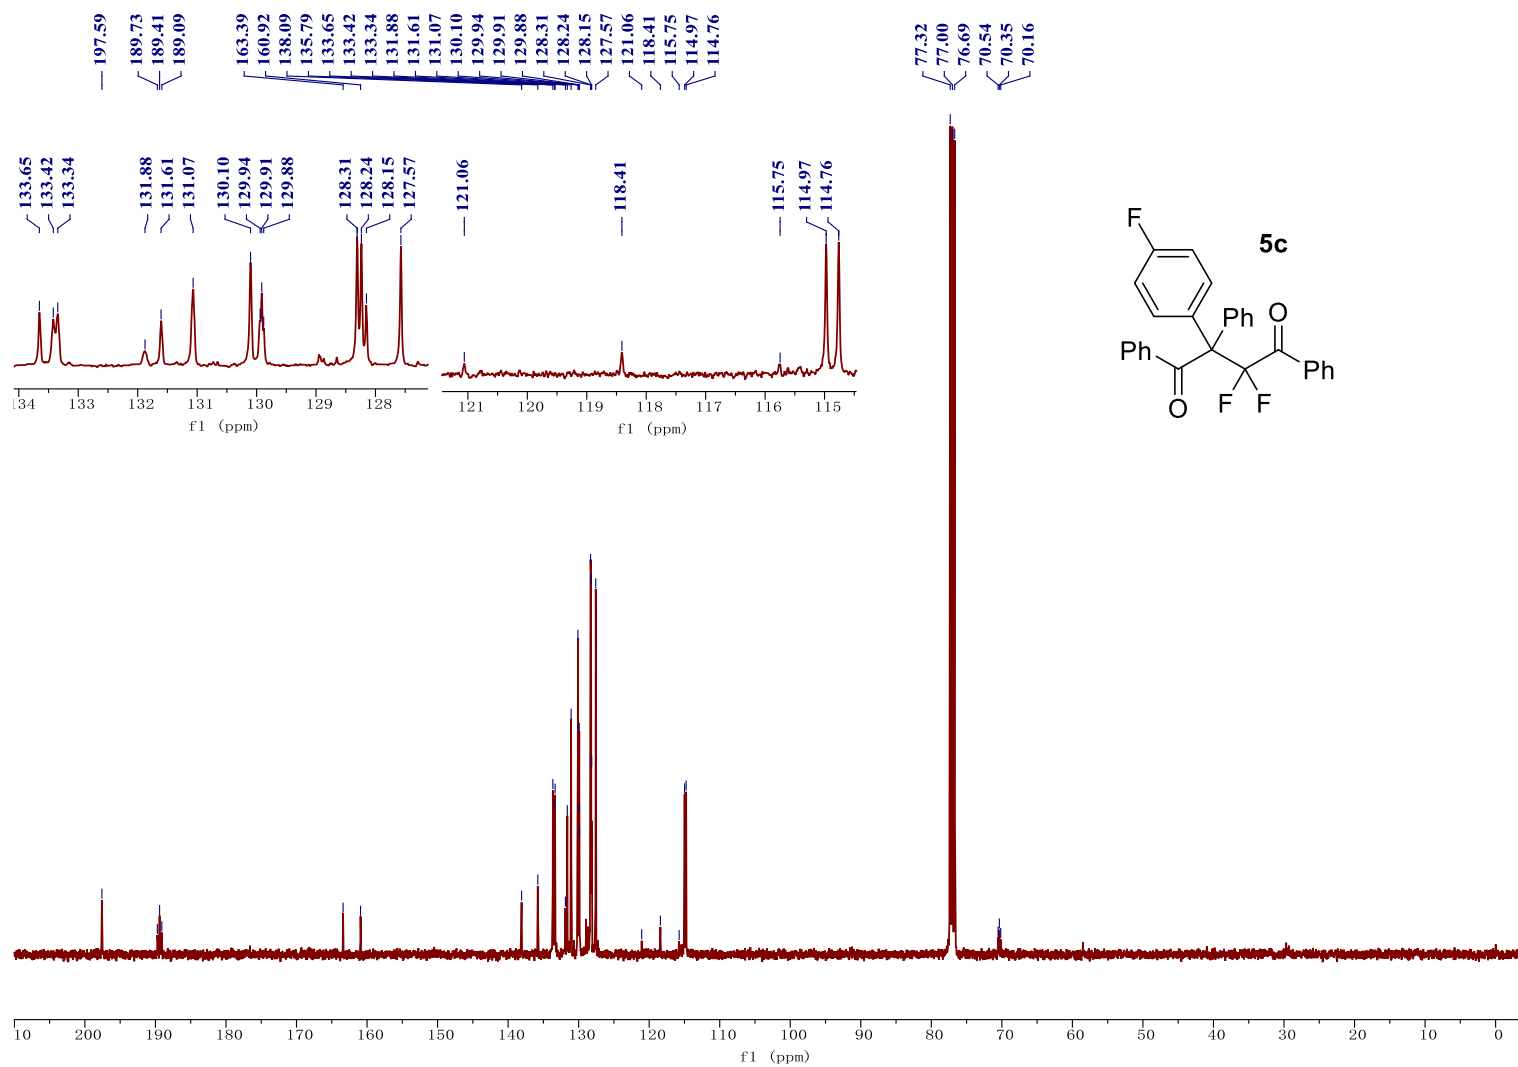

**$^{19}\text{F}$  NMR of Compound 5c (376 MHz,  $\text{CDCl}_3$ )**

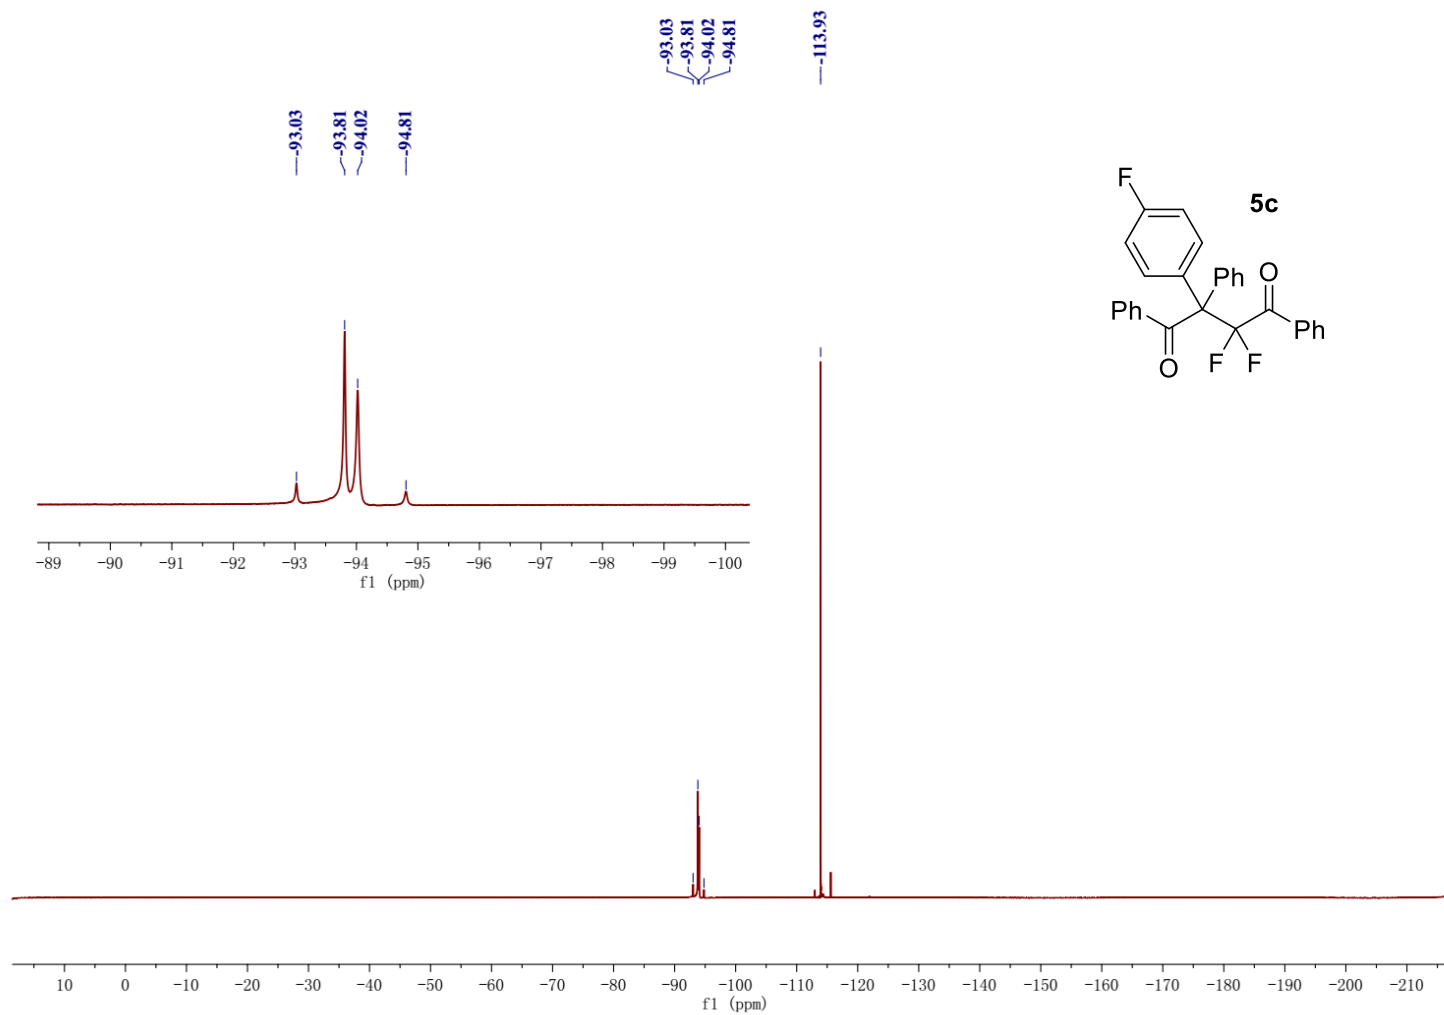

### **<sup>1</sup>H NMR of Compound 5e (400 MHz, CDCl<sub>3</sub>)**

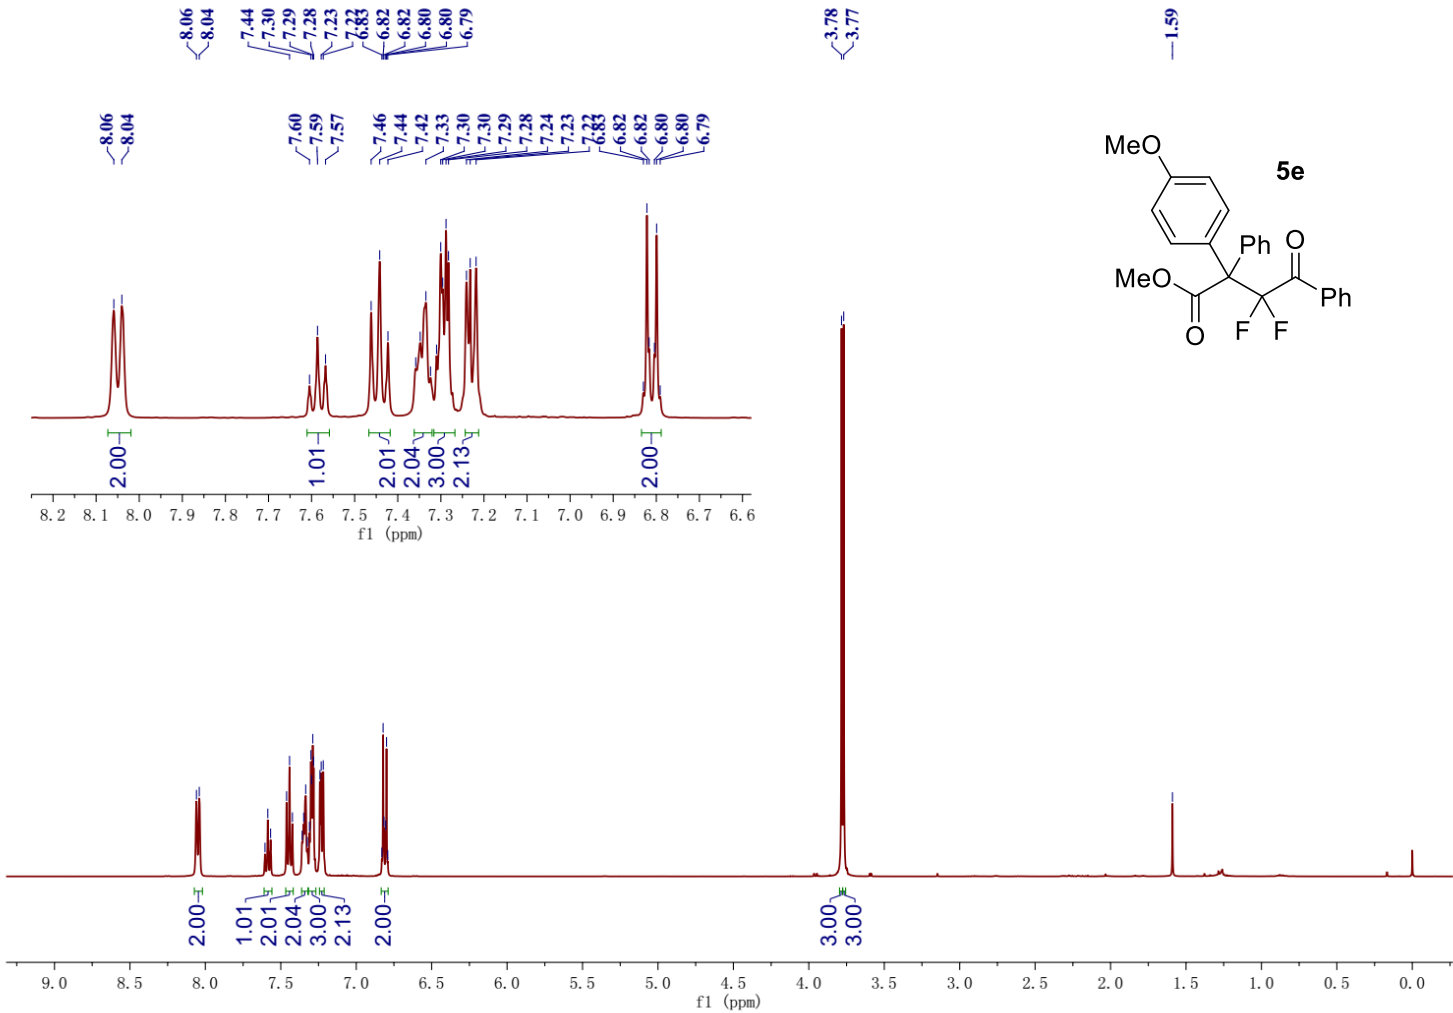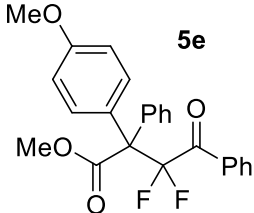

**$^{13}\text{C}$  NMR of Compound 5e (100 MHz,  $\text{CDCl}_3$ )**

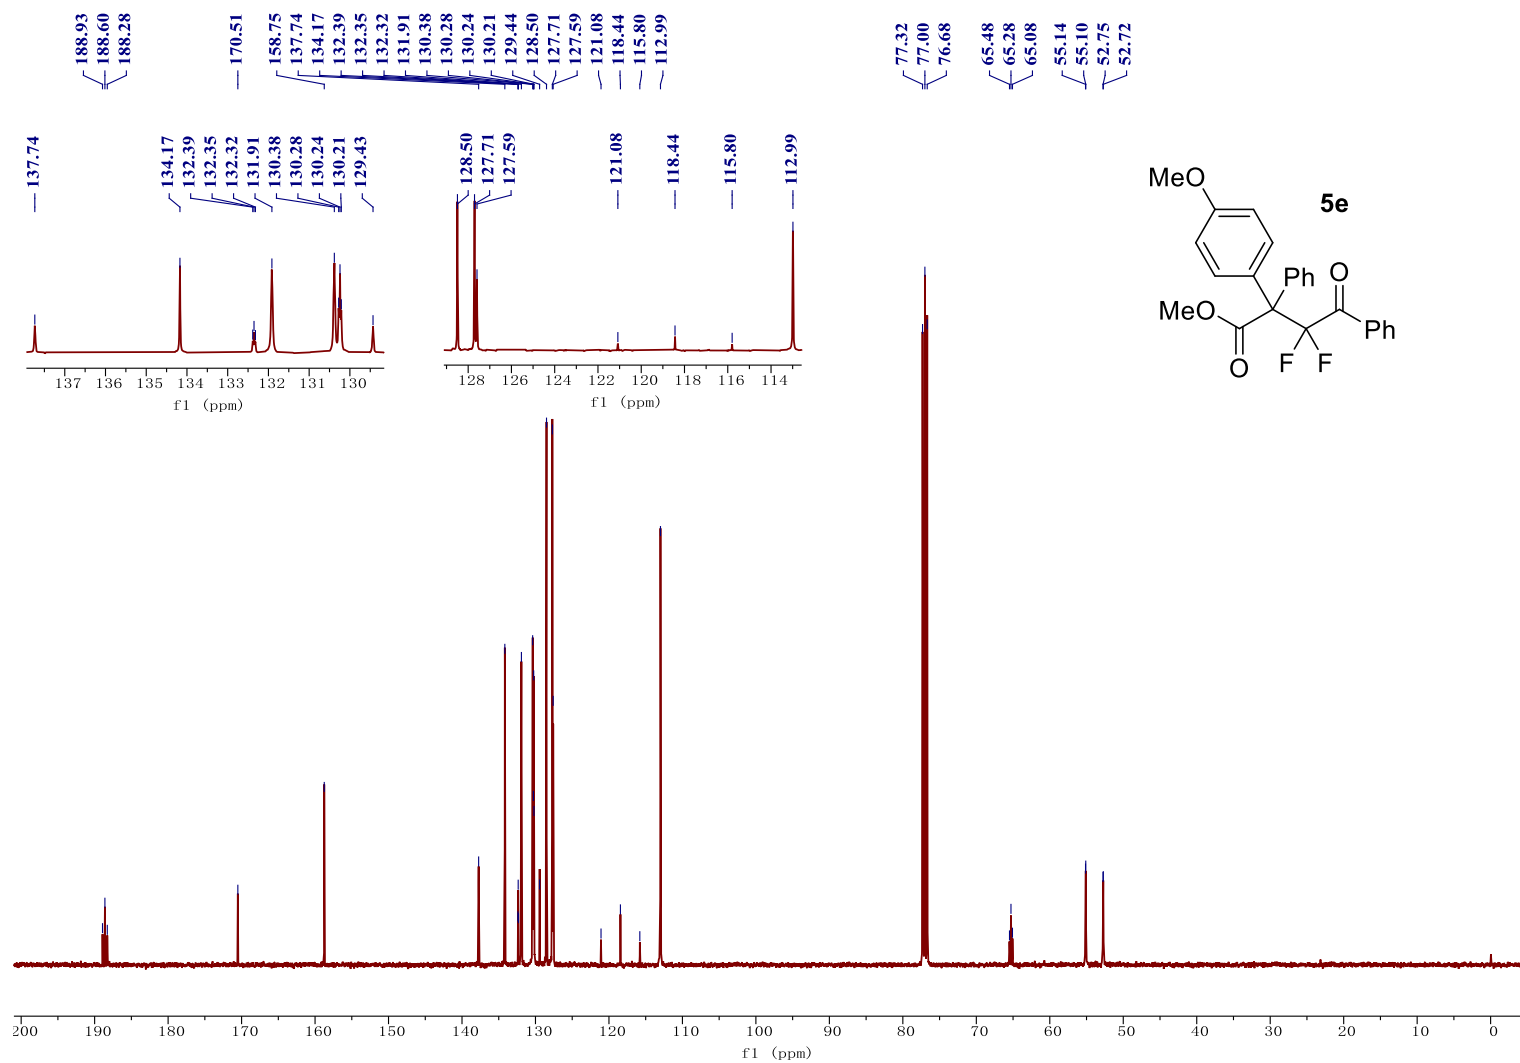

**$^{19}\text{F}$  NMR of Compound 5e (376 MHz,  $\text{CDCl}_3$ )**

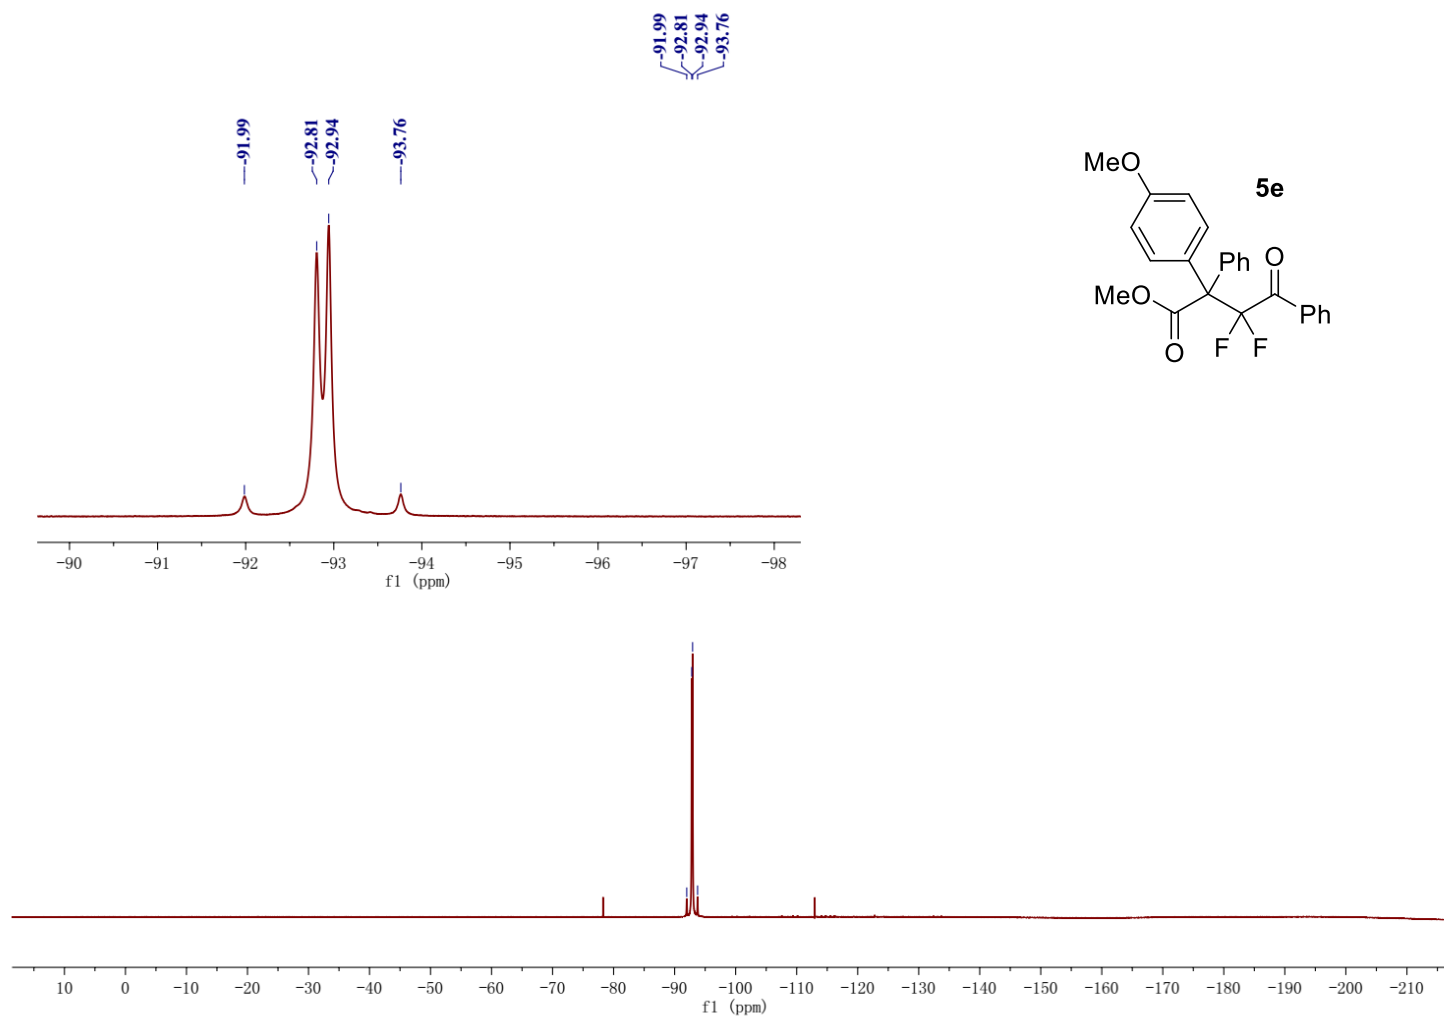

# <sup>1</sup>H NMR of Compound 5f (400 MHz, CDCl<sub>3</sub>)

HYJ-HB-49  
1H-400M

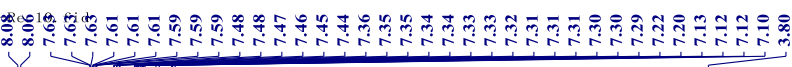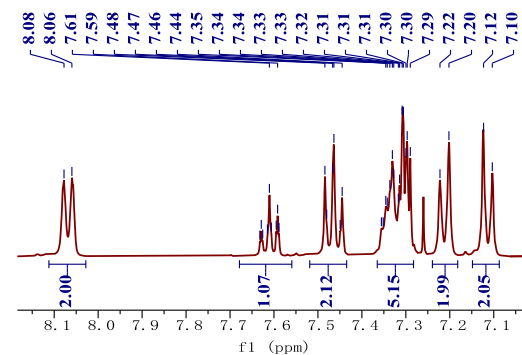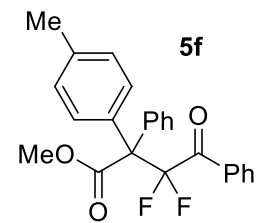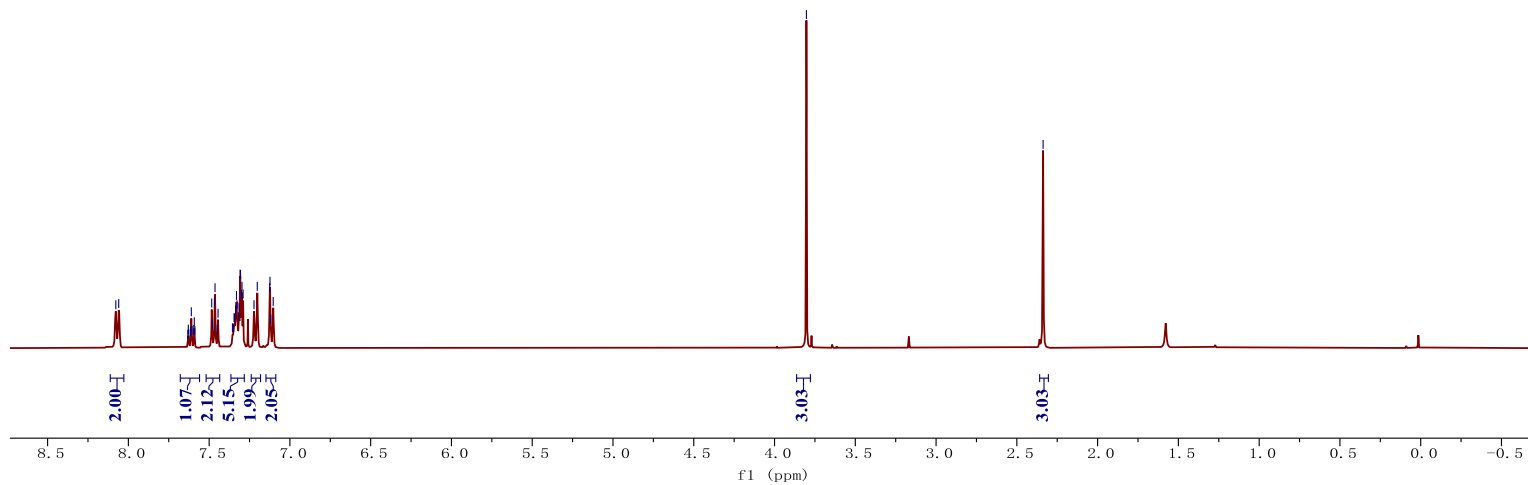



**$^{13}\text{C}$  NMR of Compound 5f (125 MHz,  $\text{CDCl}_3$ )**

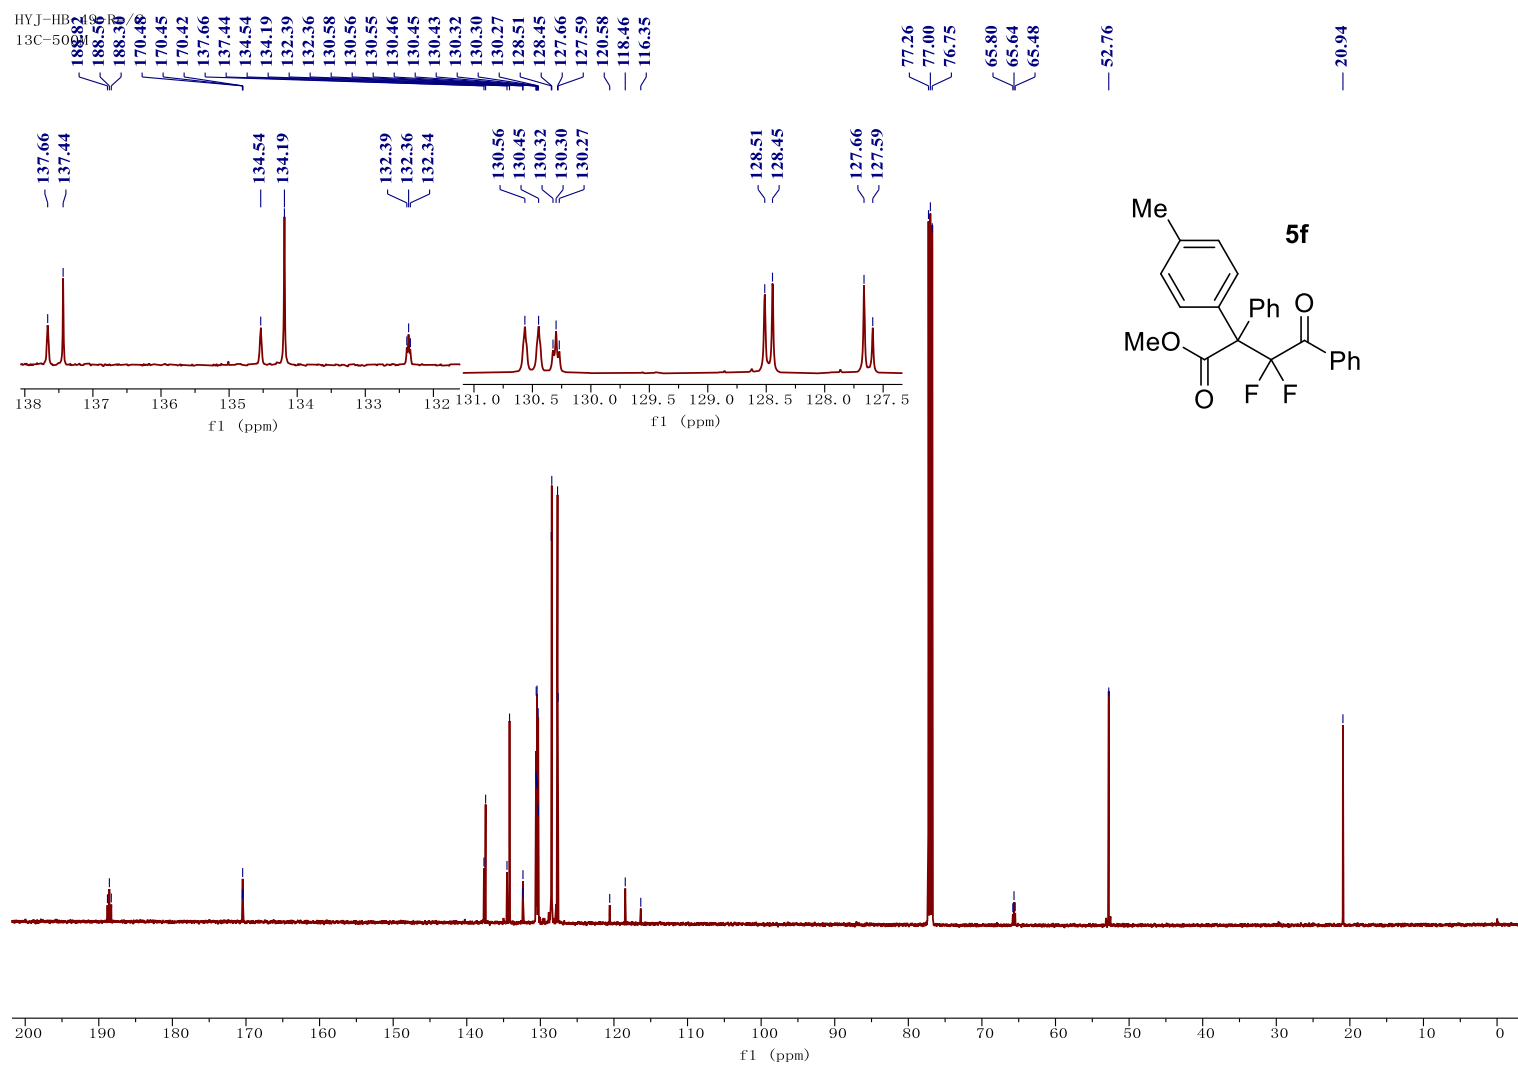

**$^{19}\text{F}$  NMR of Compound 5f (376 MHz,  $\text{CDCl}_3$ )**

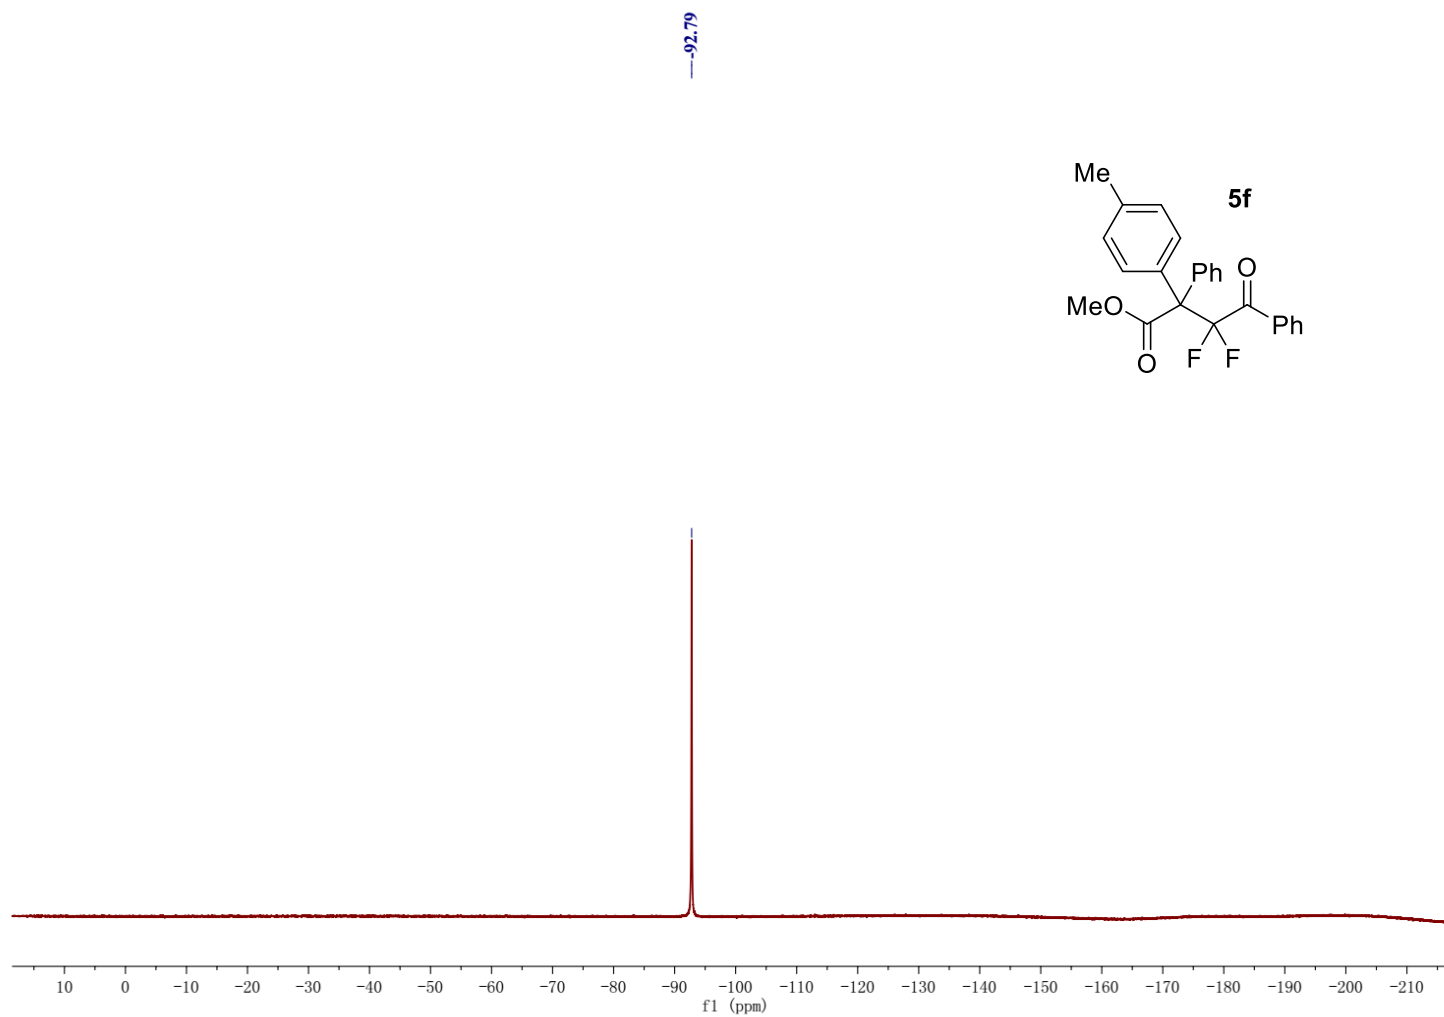

<sup>1</sup>H NMR of Compound 5h (400 MHz, CDCl<sub>3</sub>)

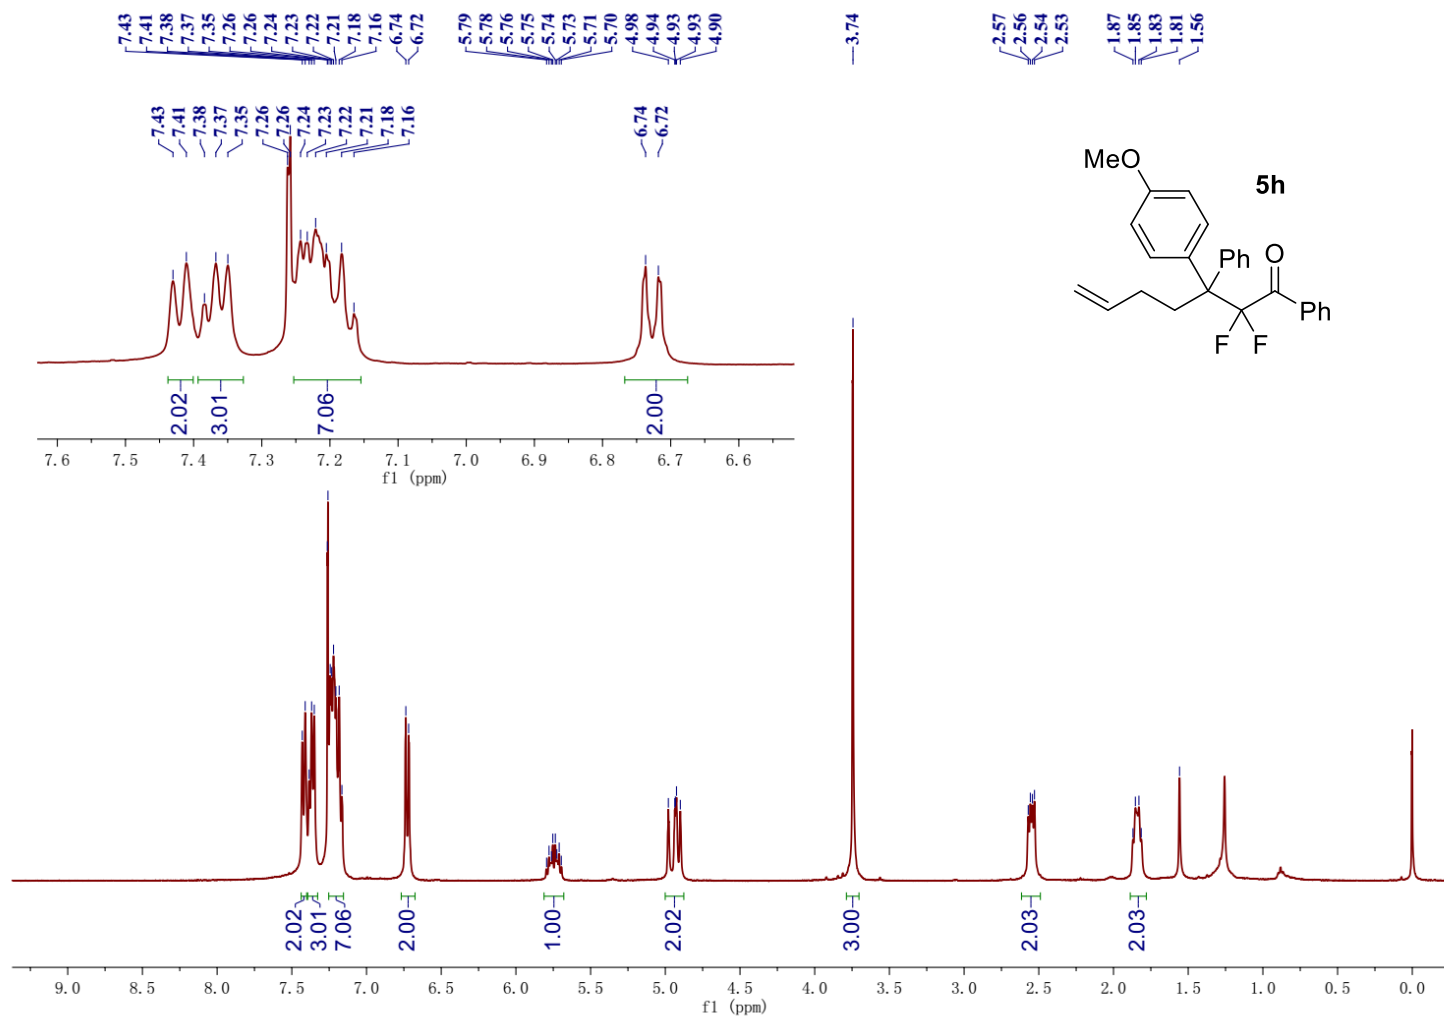

**$^{13}\text{C}$  NMR of Compound 5h (100 MHz,  $\text{CDCl}_3$ )**

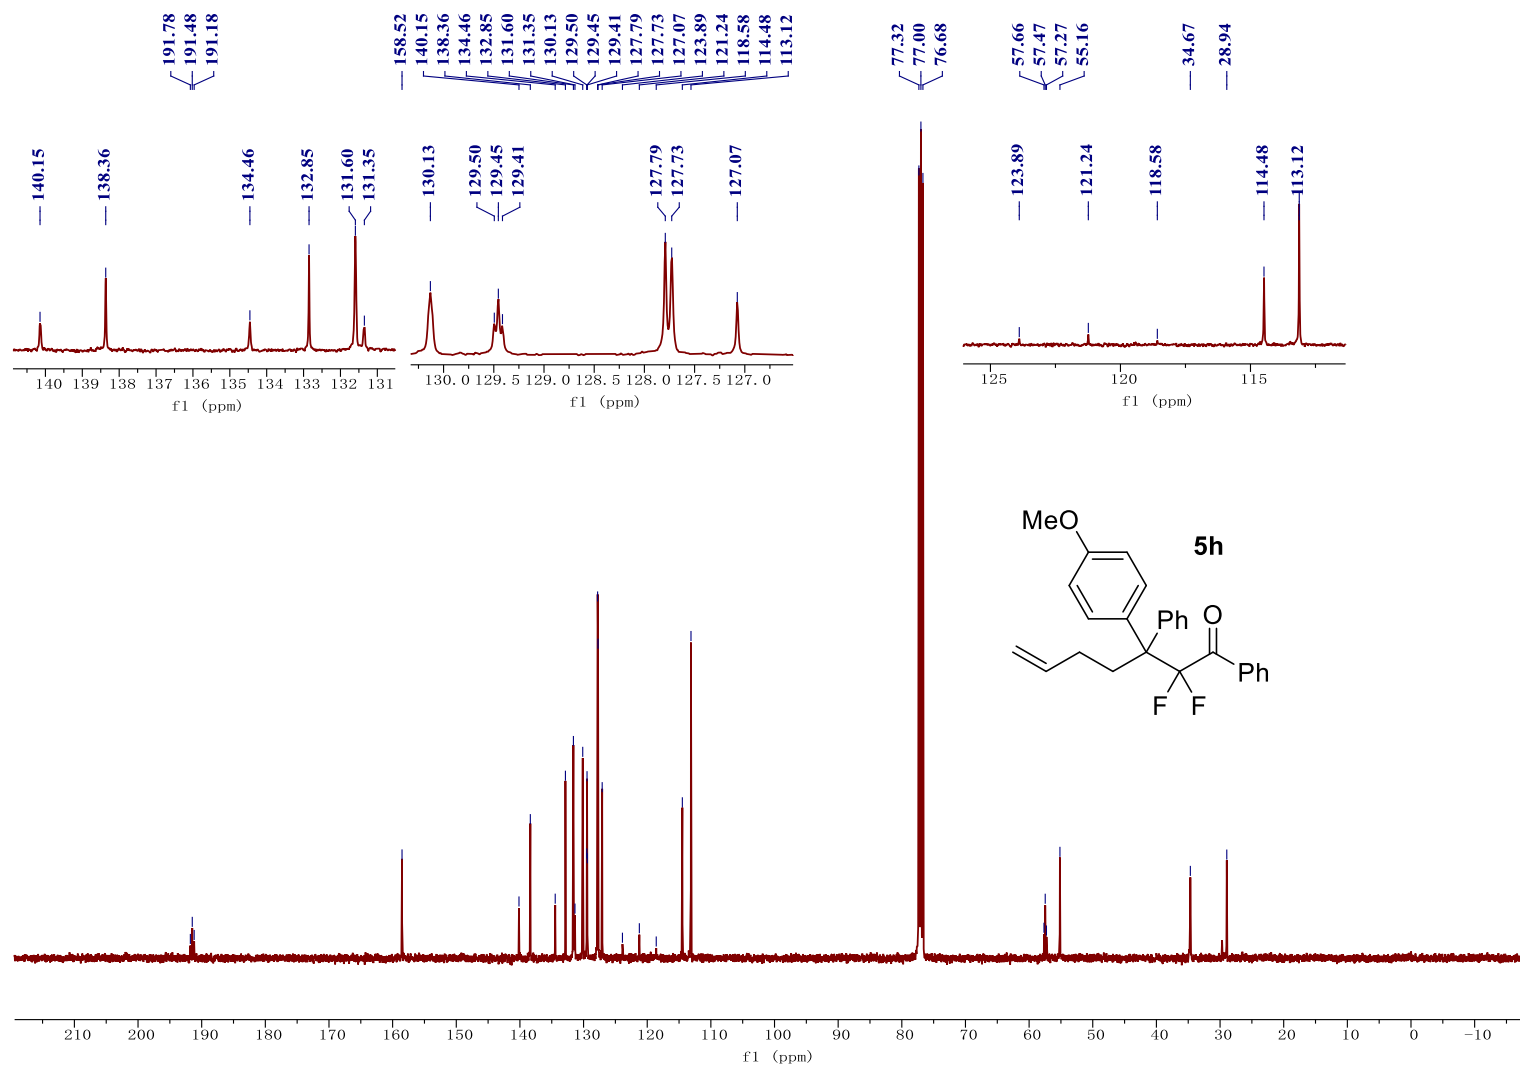

**$^{19}\text{F}$  NMR of Compound 5h (376 MHz,  $\text{CDCl}_3$ )**

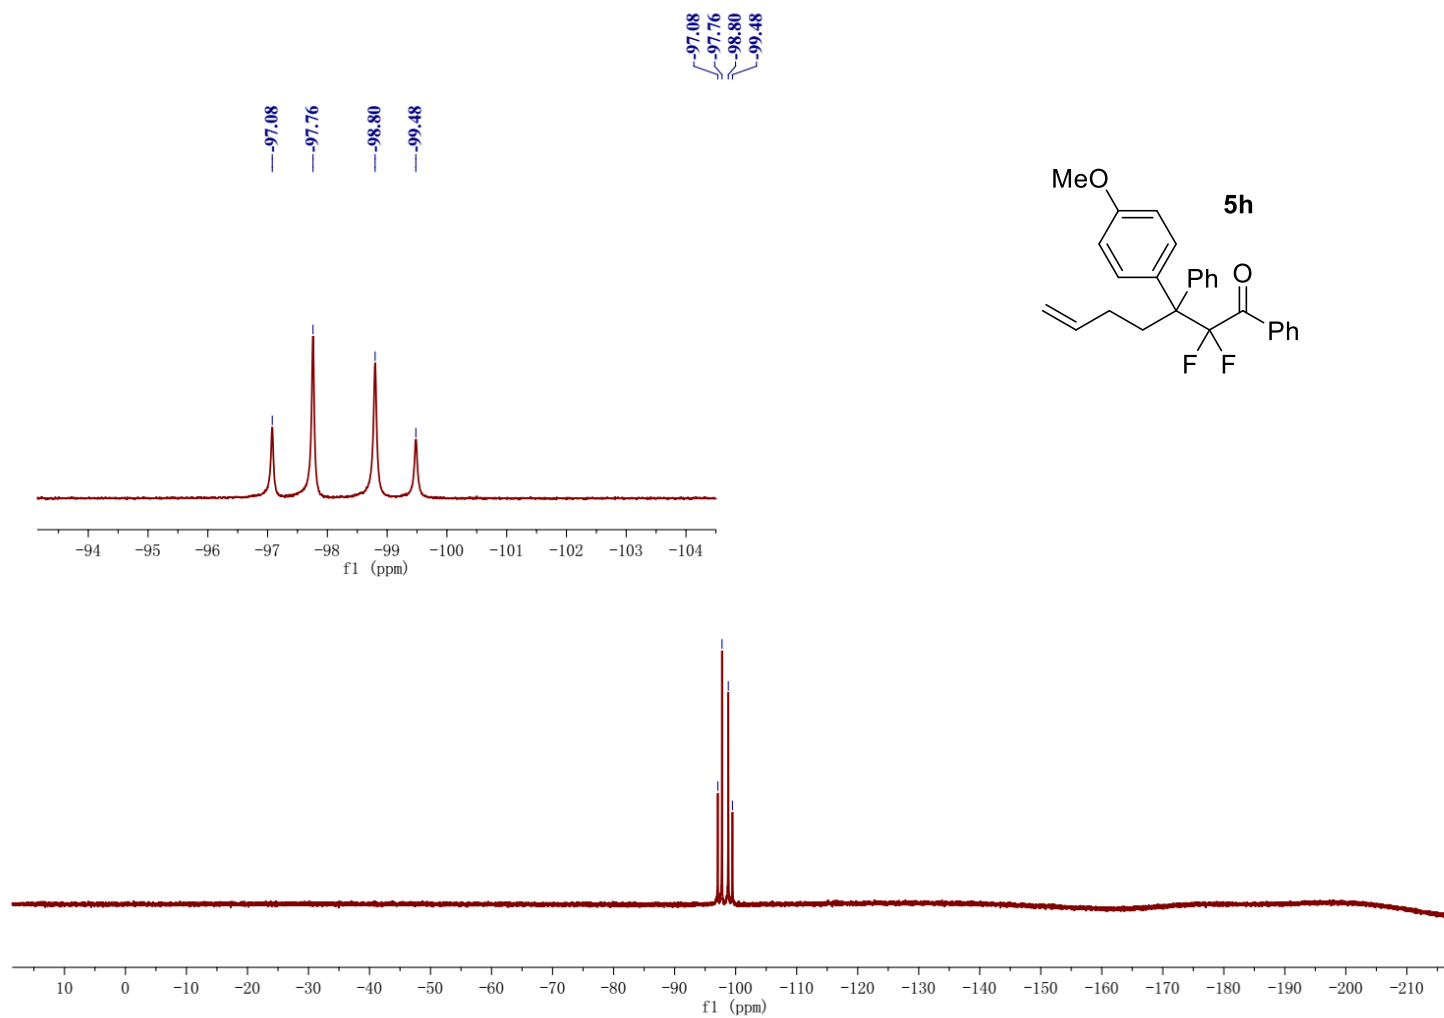

**<sup>1</sup>H NMR of Compound 5i (400 MHz, CDCl<sub>3</sub>)**

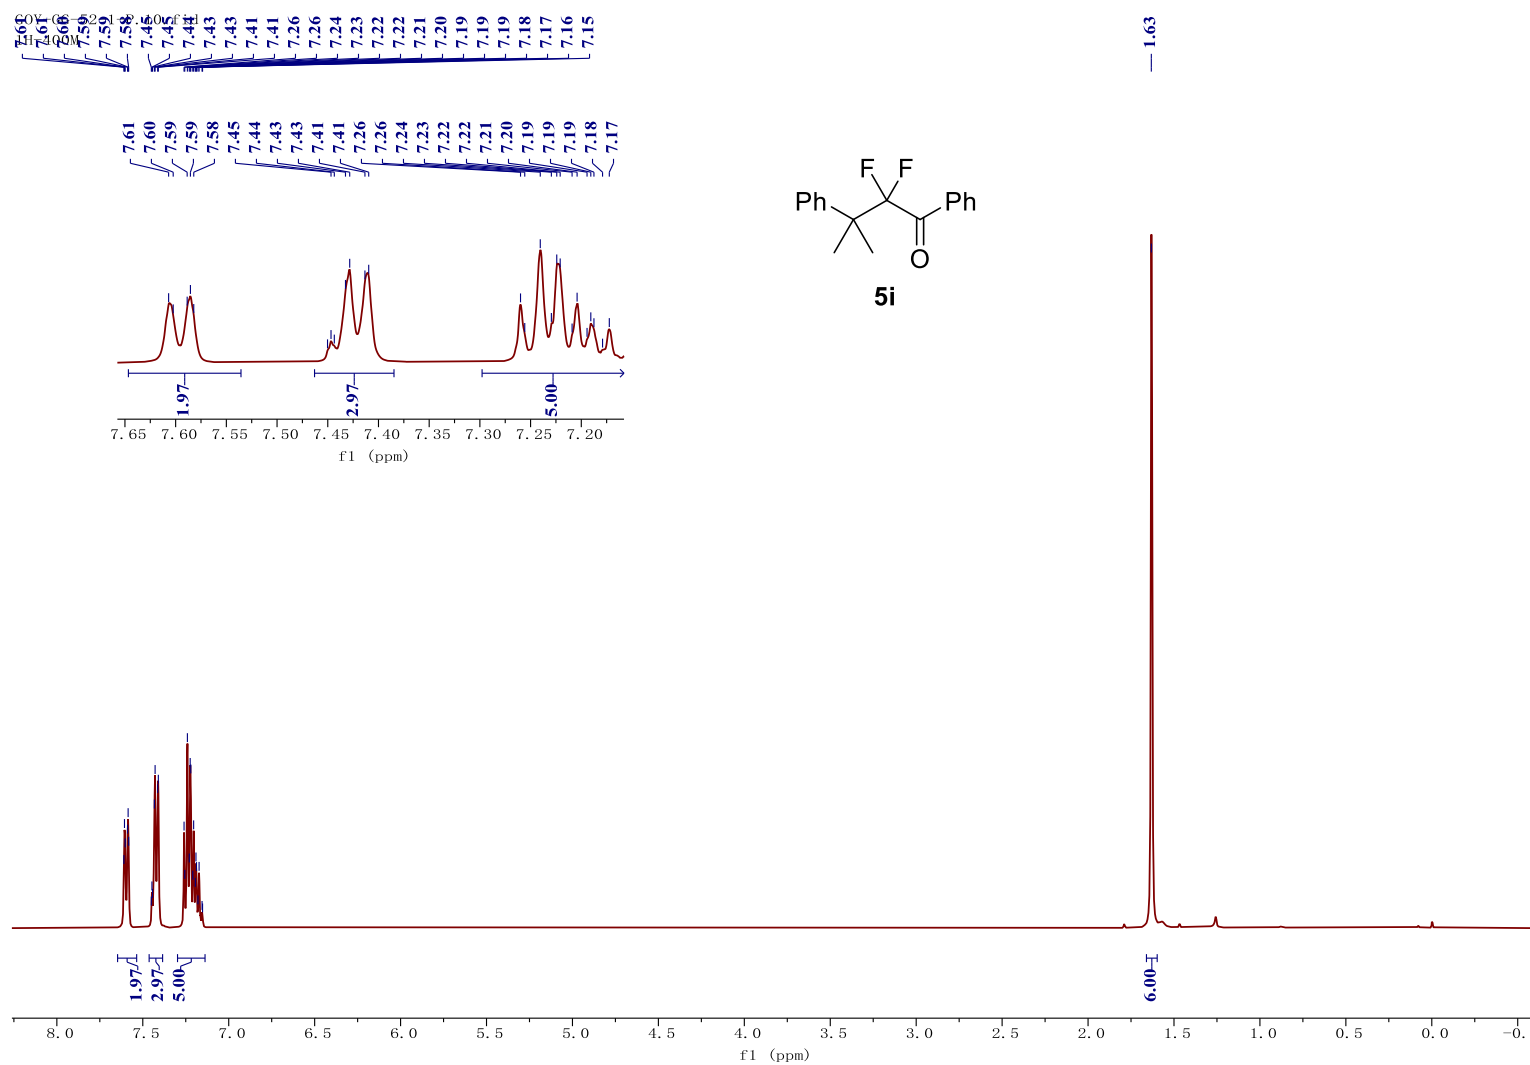

# <sup>13</sup>C NMR of Compound 5i (100 MHz, CDCl<sub>3</sub>)

GOY-GG-52017.20.fid  
13C-400

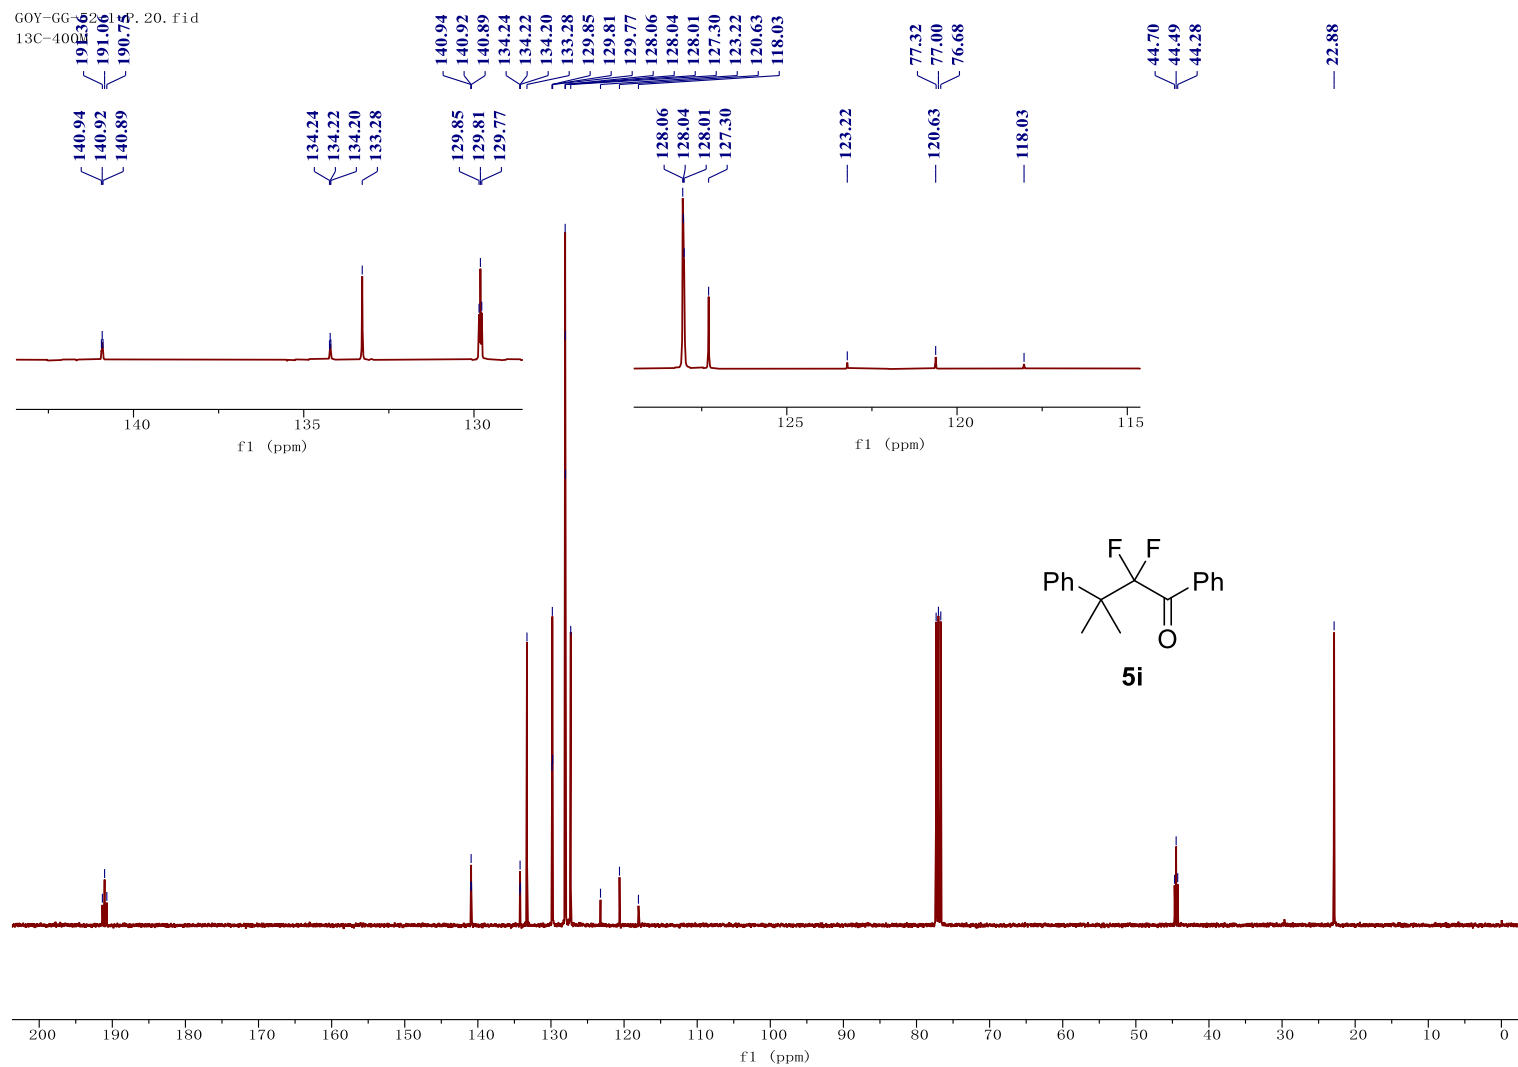

**$^{19}\text{F}$  NMR of Compound 5i (376 MHz,  $\text{CDCl}_3$ )**

G0Y-GG-52-1-P, 11, fid  
19F-400M

-105.39

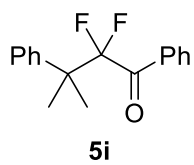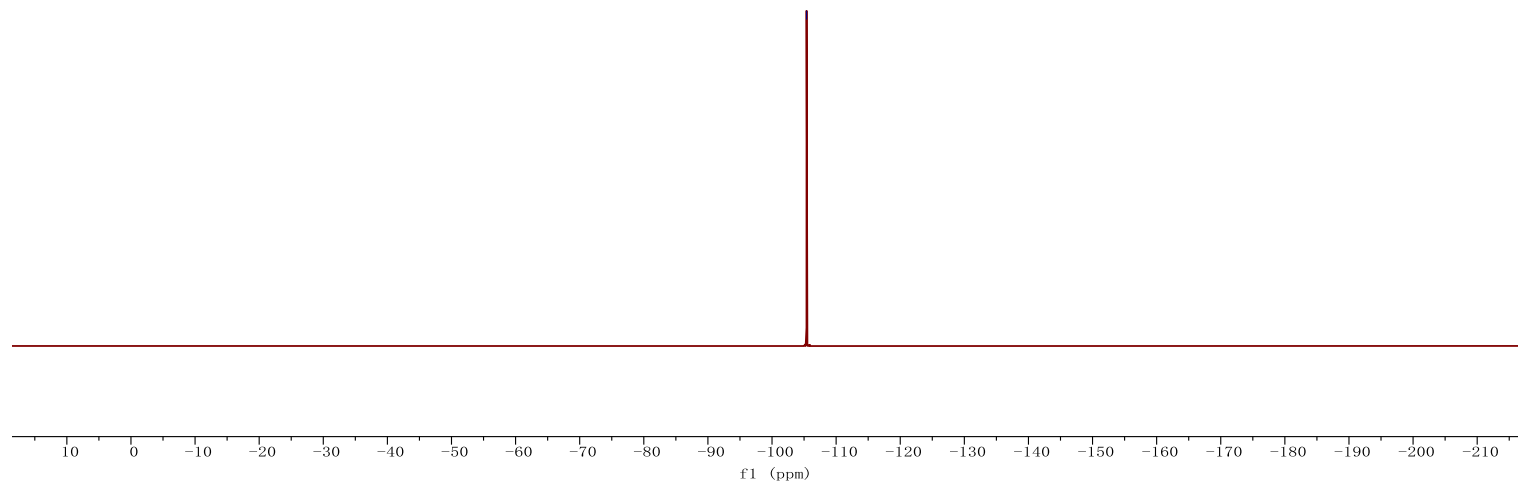



# <sup>1</sup>H NMR of Compound 5k (400 MHz, CDCl<sub>3</sub>)

GOY-GG-52-2-P, 2021  
1H-400M

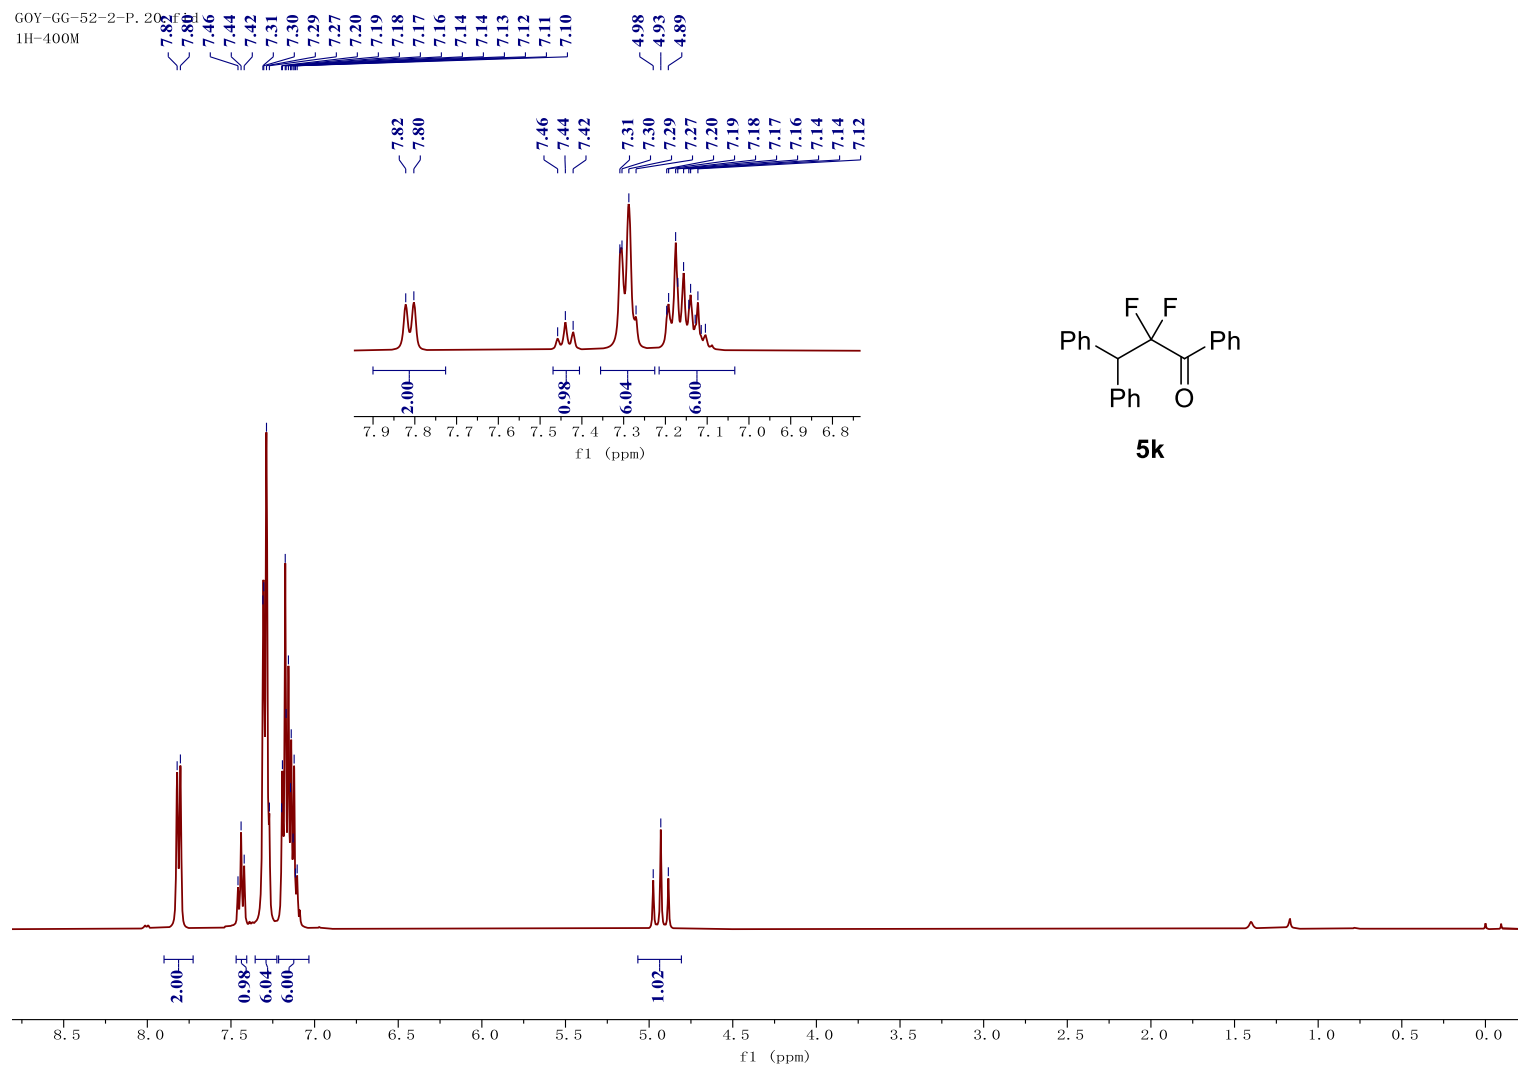

# <sup>13</sup>C NMR of Compound 5k (100 MHz, CDCl<sub>3</sub>)

GOY-GG-52-8, f1d  
13C-400M

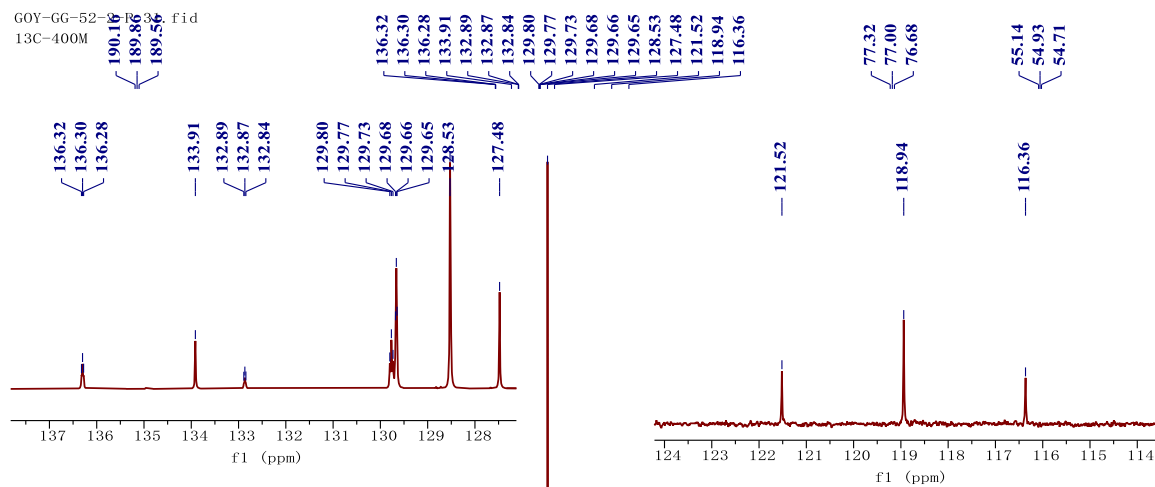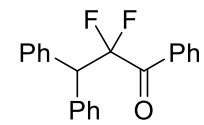

**5k**

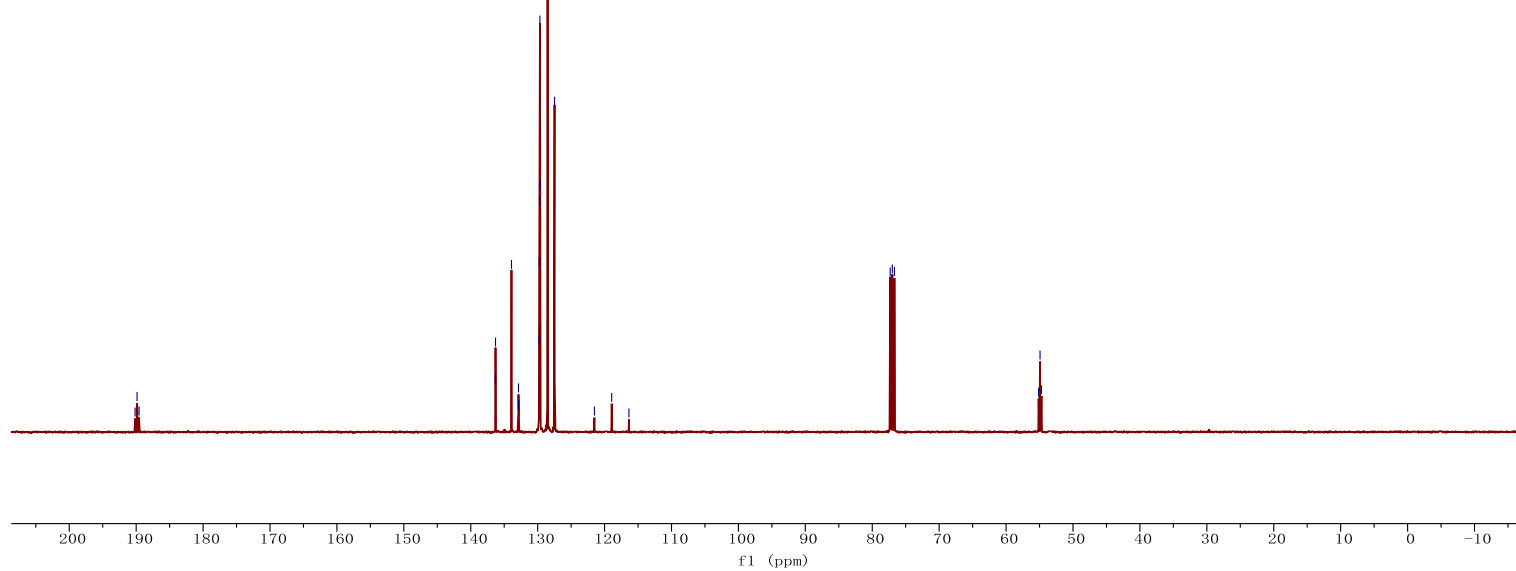

# <sup>19</sup>F NMR of Compound 5k (376 MHz, CDCl<sub>3</sub>)

GOY-GG-52-2-P. 22. fid  
19F-400M

-99.90

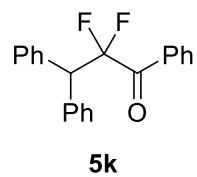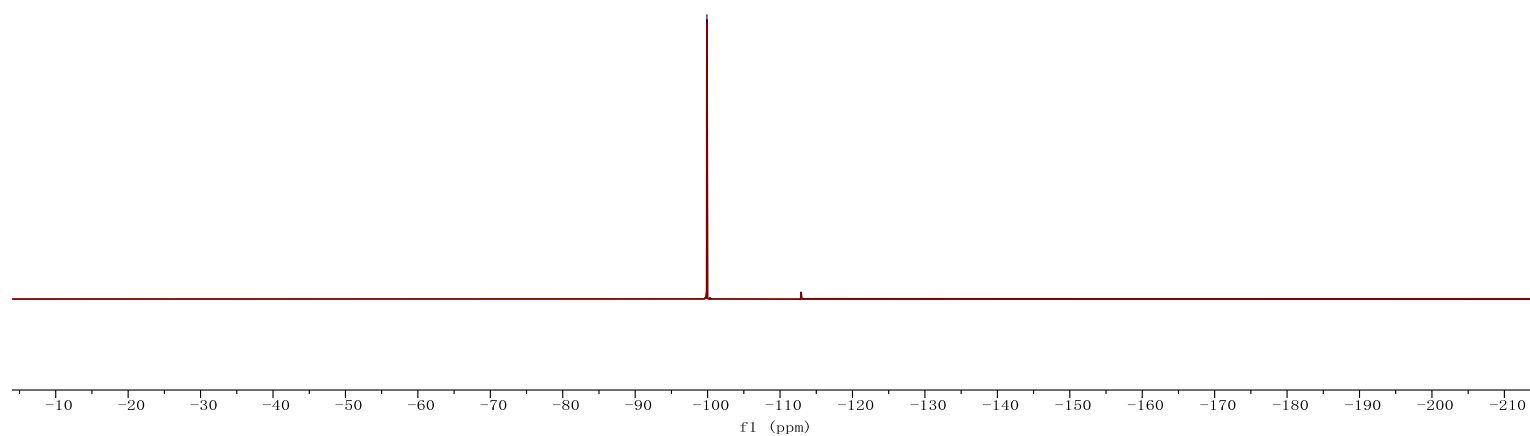

# <sup>1</sup>H NMR of Compound 5I (400 MHz, CDCl<sub>3</sub>)

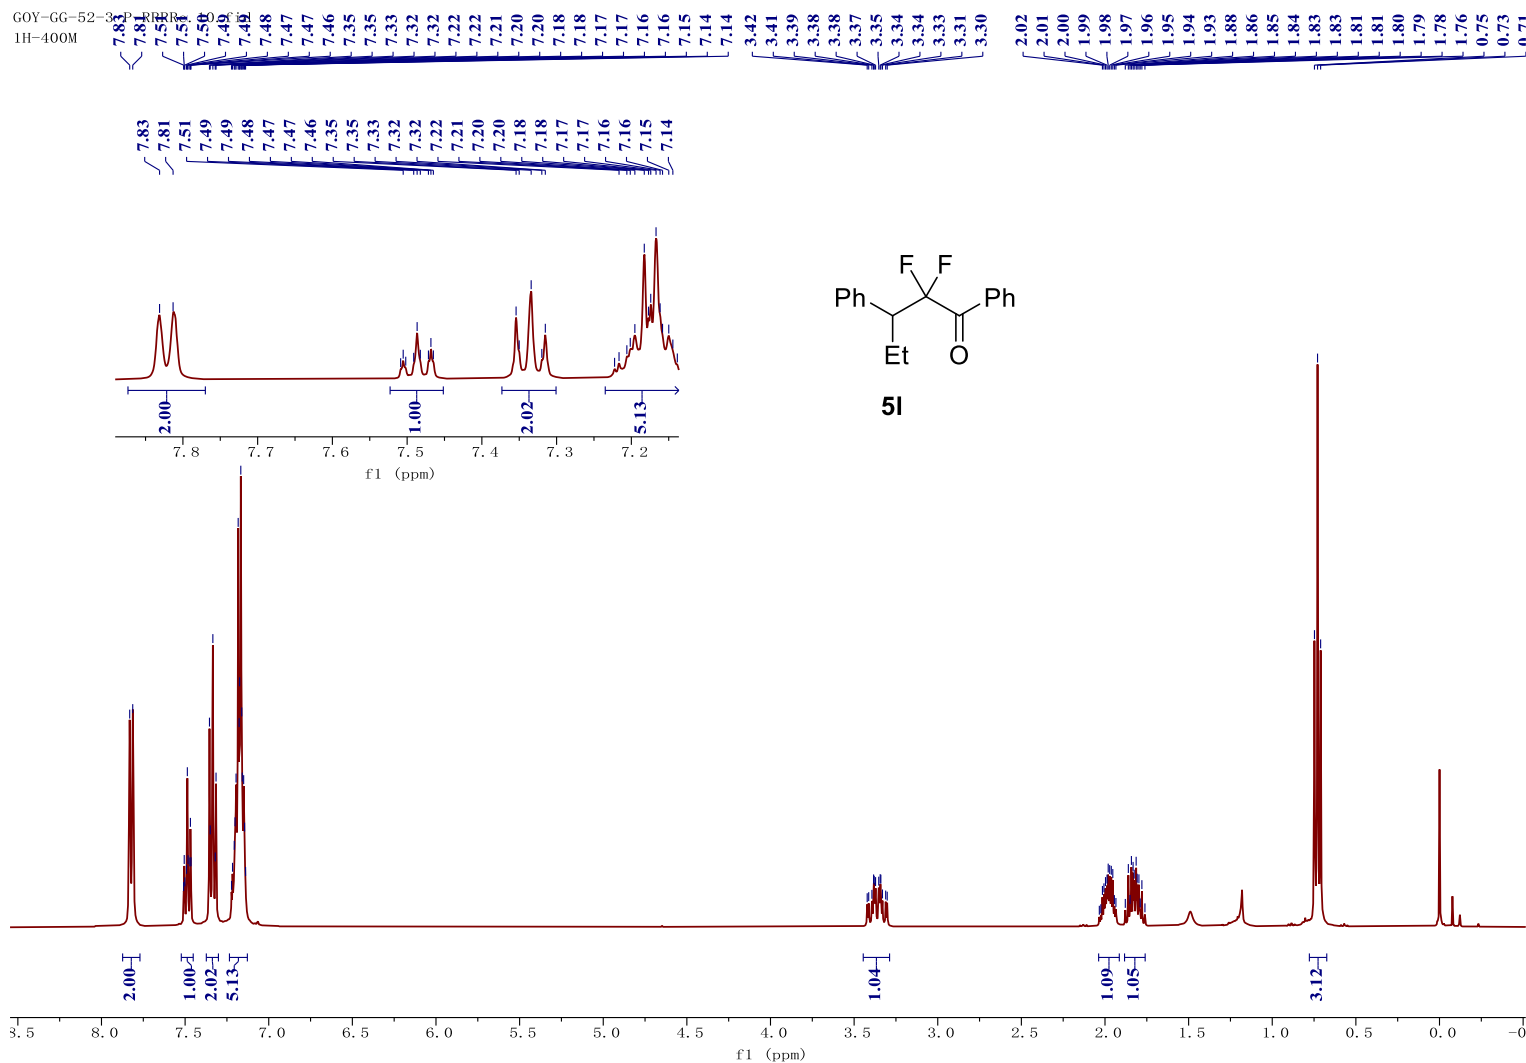

# <sup>13</sup>C NMR of Compound 5l (125 MHz, CDCl<sub>3</sub>)

GOY-GG-52-3-P-RRR-18C.1.fid  
13C-500M

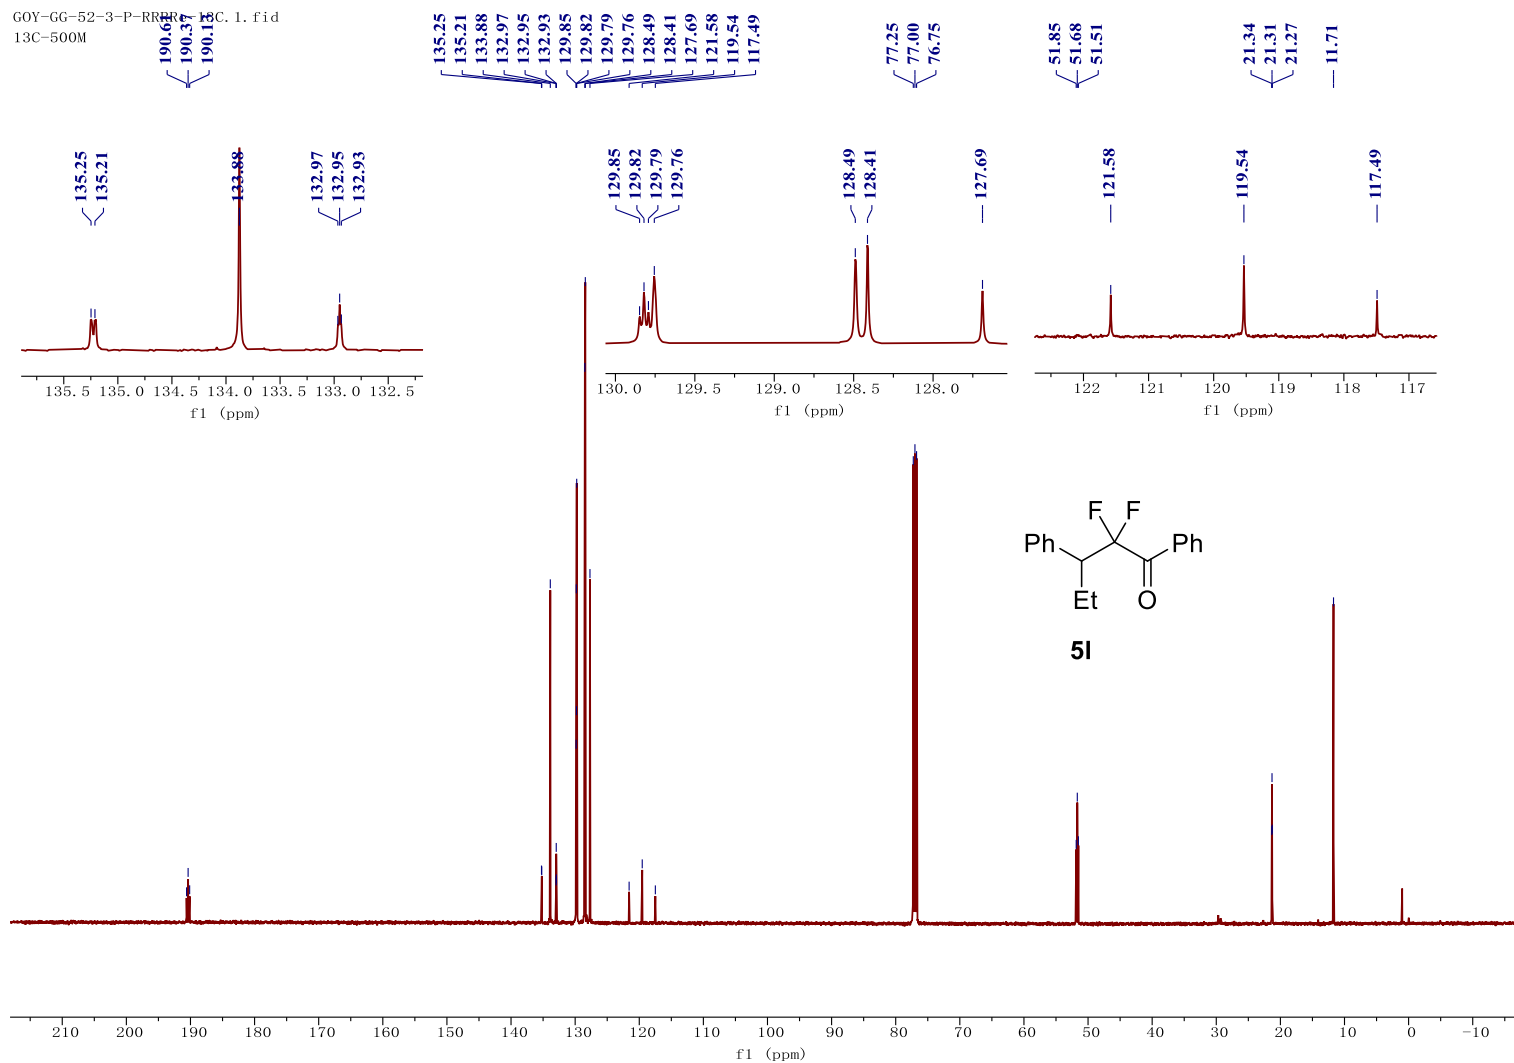

# <sup>19</sup>F NMR of Compound 5I (376 MHz, CDCl<sub>3</sub>)

GOY-GG-52-3-P-RRRRe. 11. fid  
19F-400M

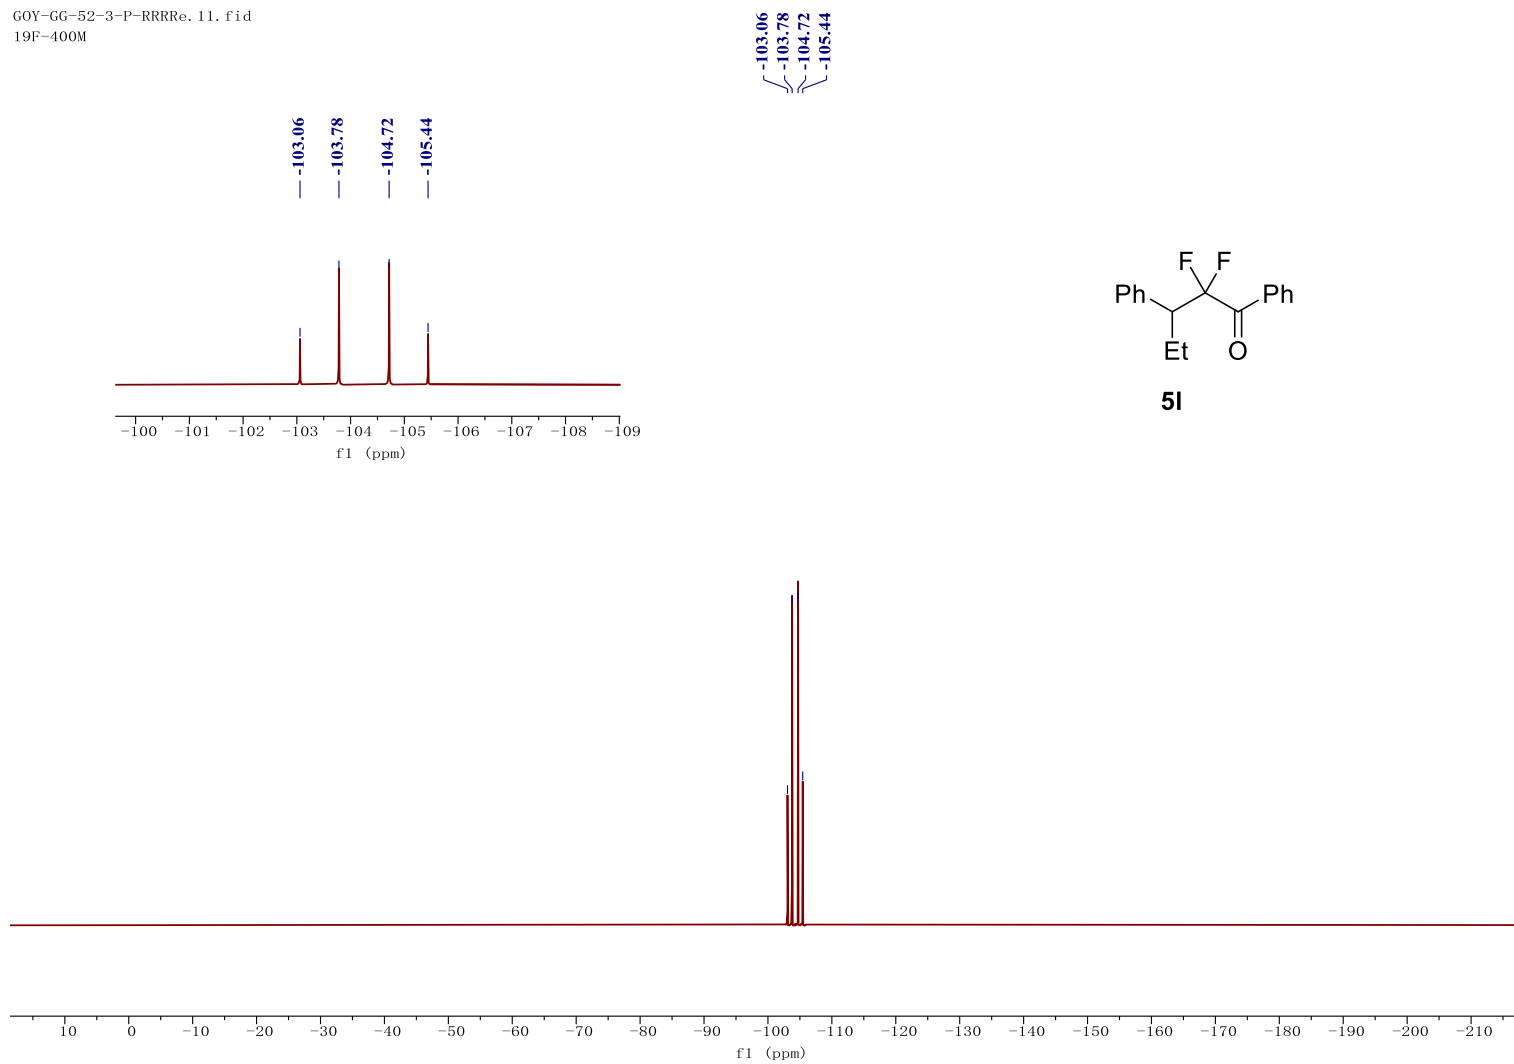

**<sup>1</sup>H NMR of Compound 6 (400 MHz, CDCl<sub>3</sub>)**

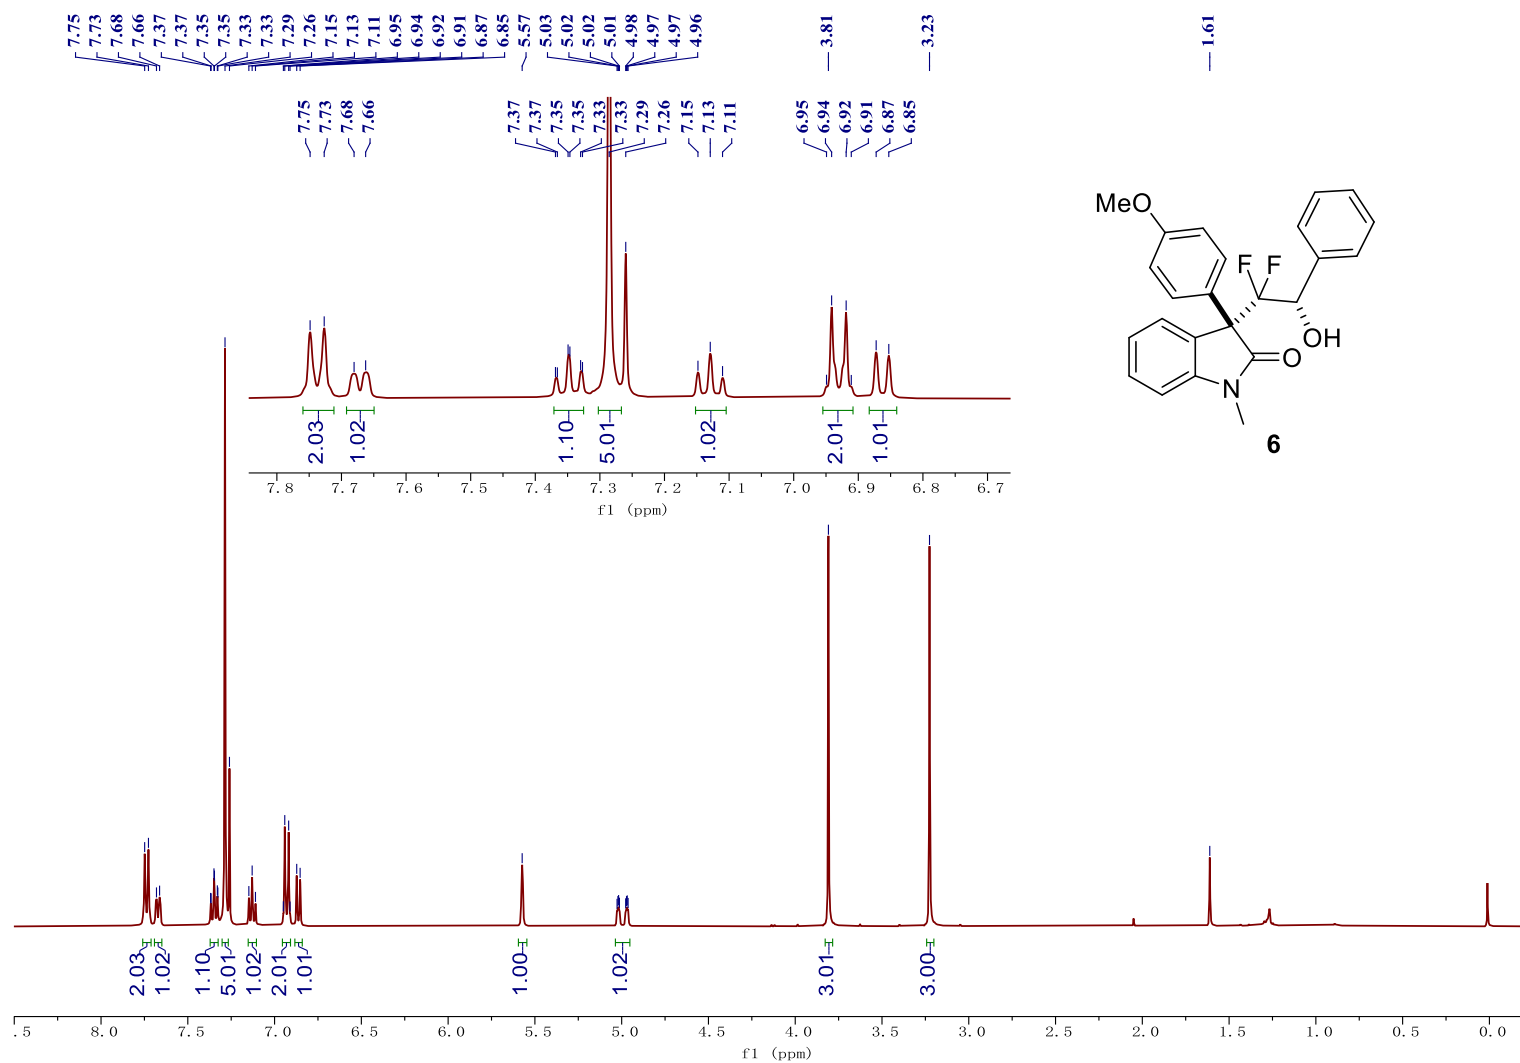

**$^{13}\text{C}$  NMR of Compound 6 (100 MHz,  $\text{CDCl}_3$ )**

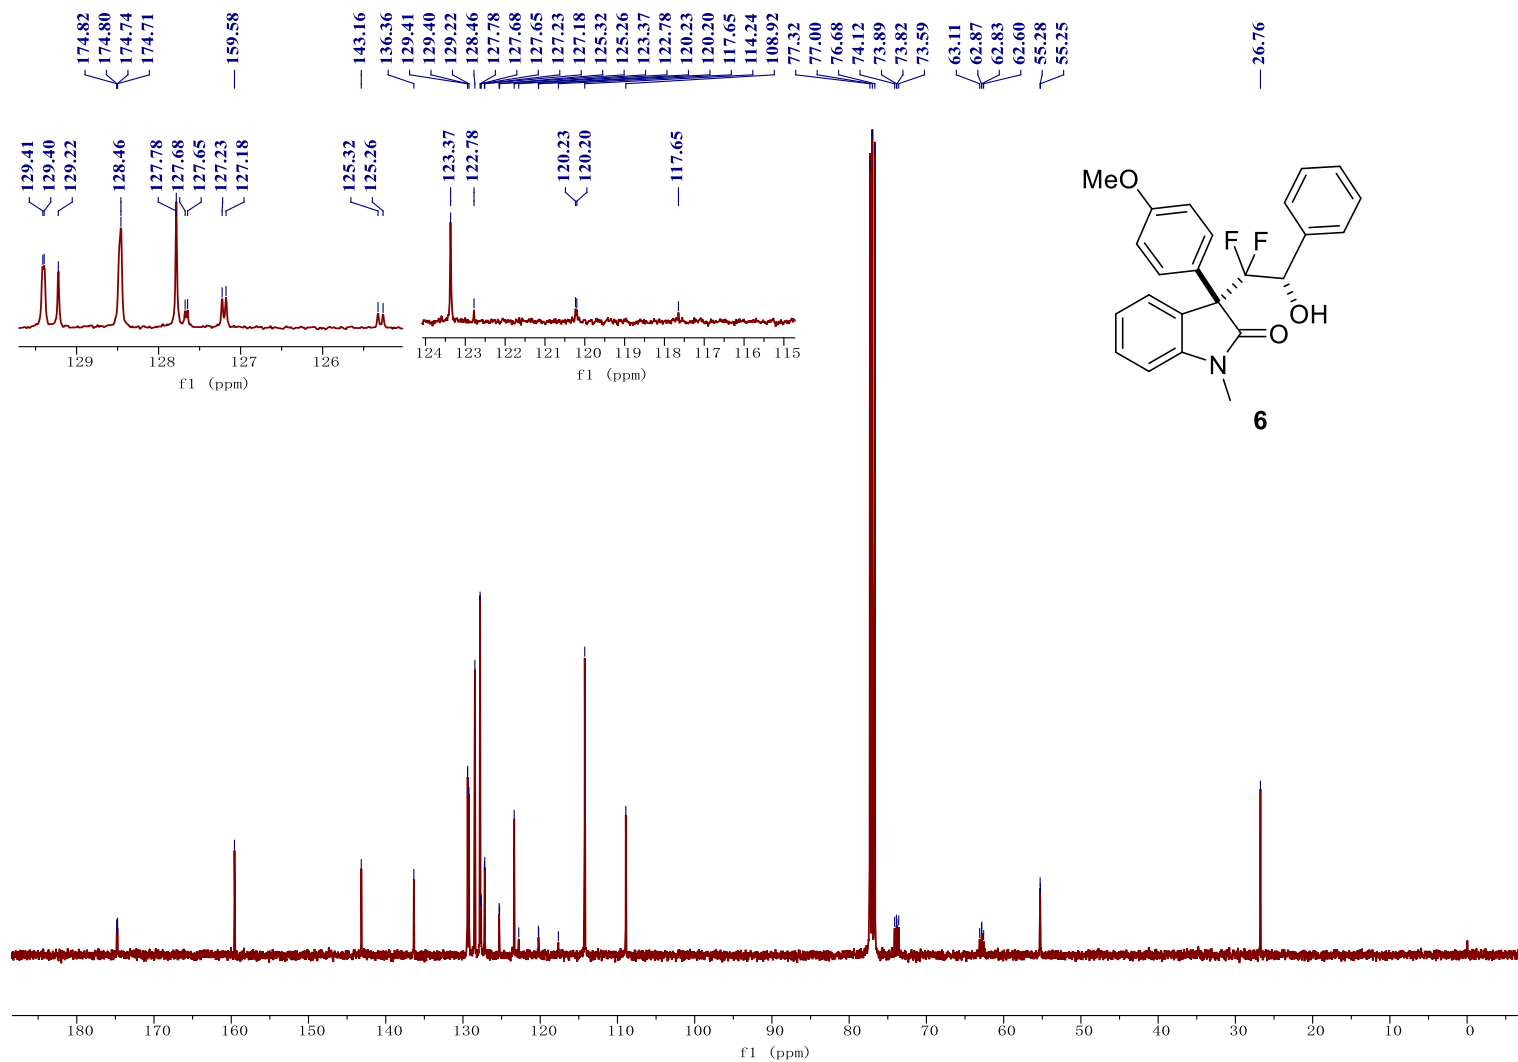



**$^{19}\text{F}$  NMR of Compound 6 (376 MHz,  $\text{CDCl}_3$ )**

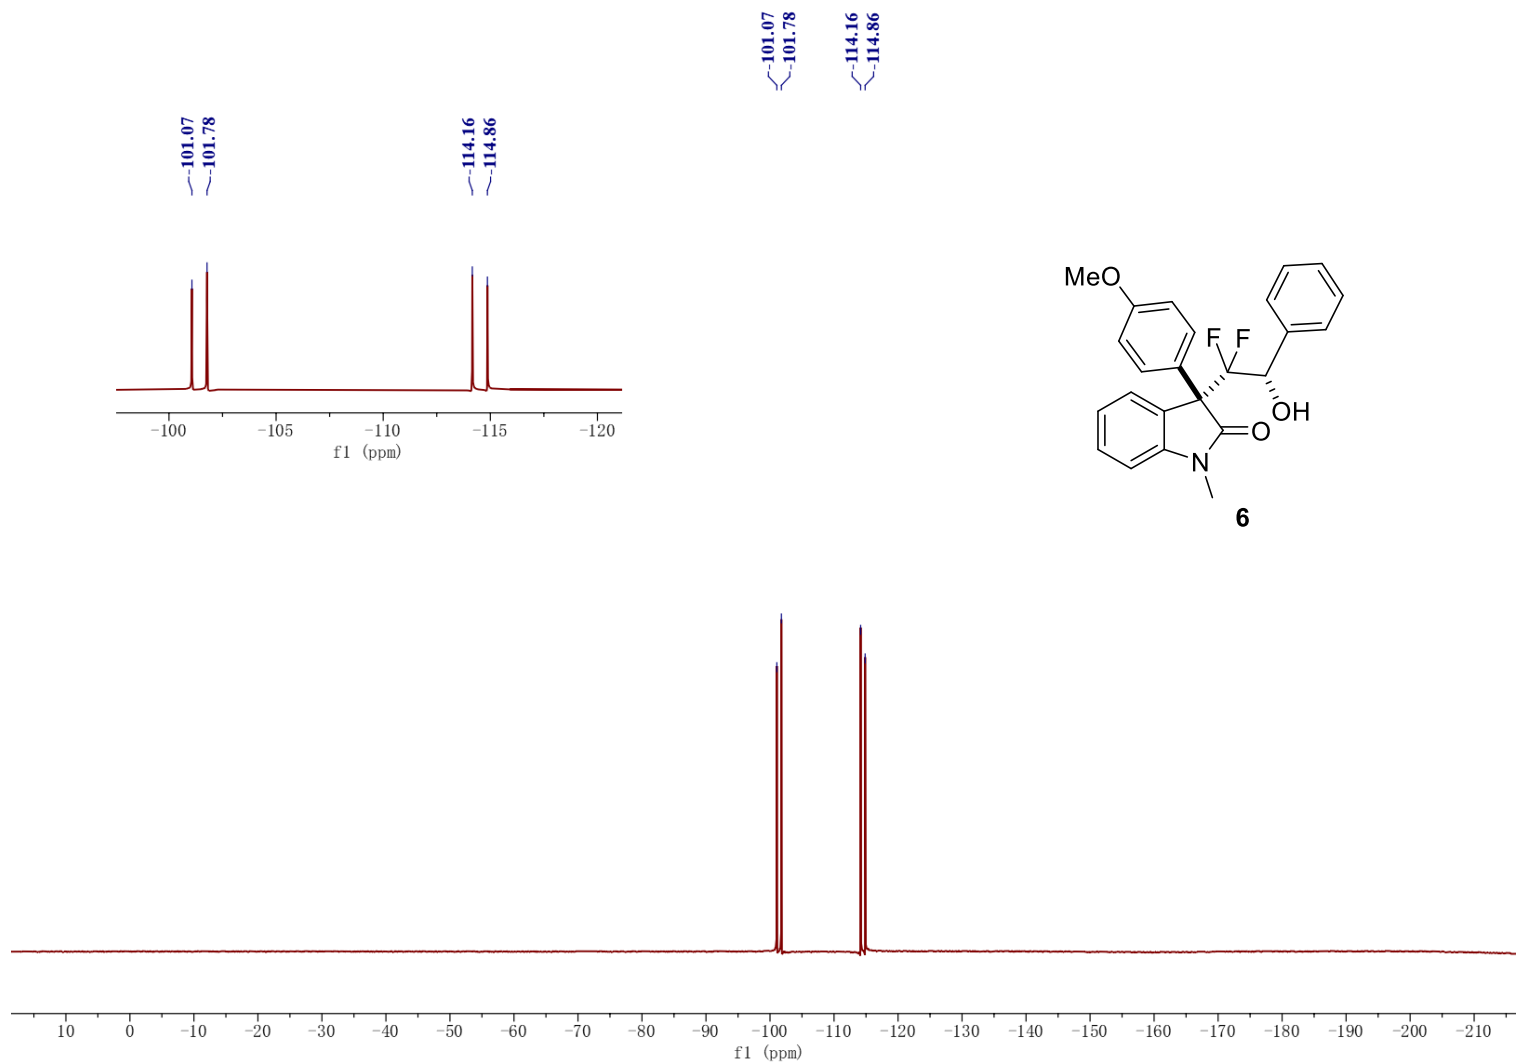

**<sup>1</sup>H NMR of Compound 7 (400 MHz, CDCl<sub>3</sub>)**

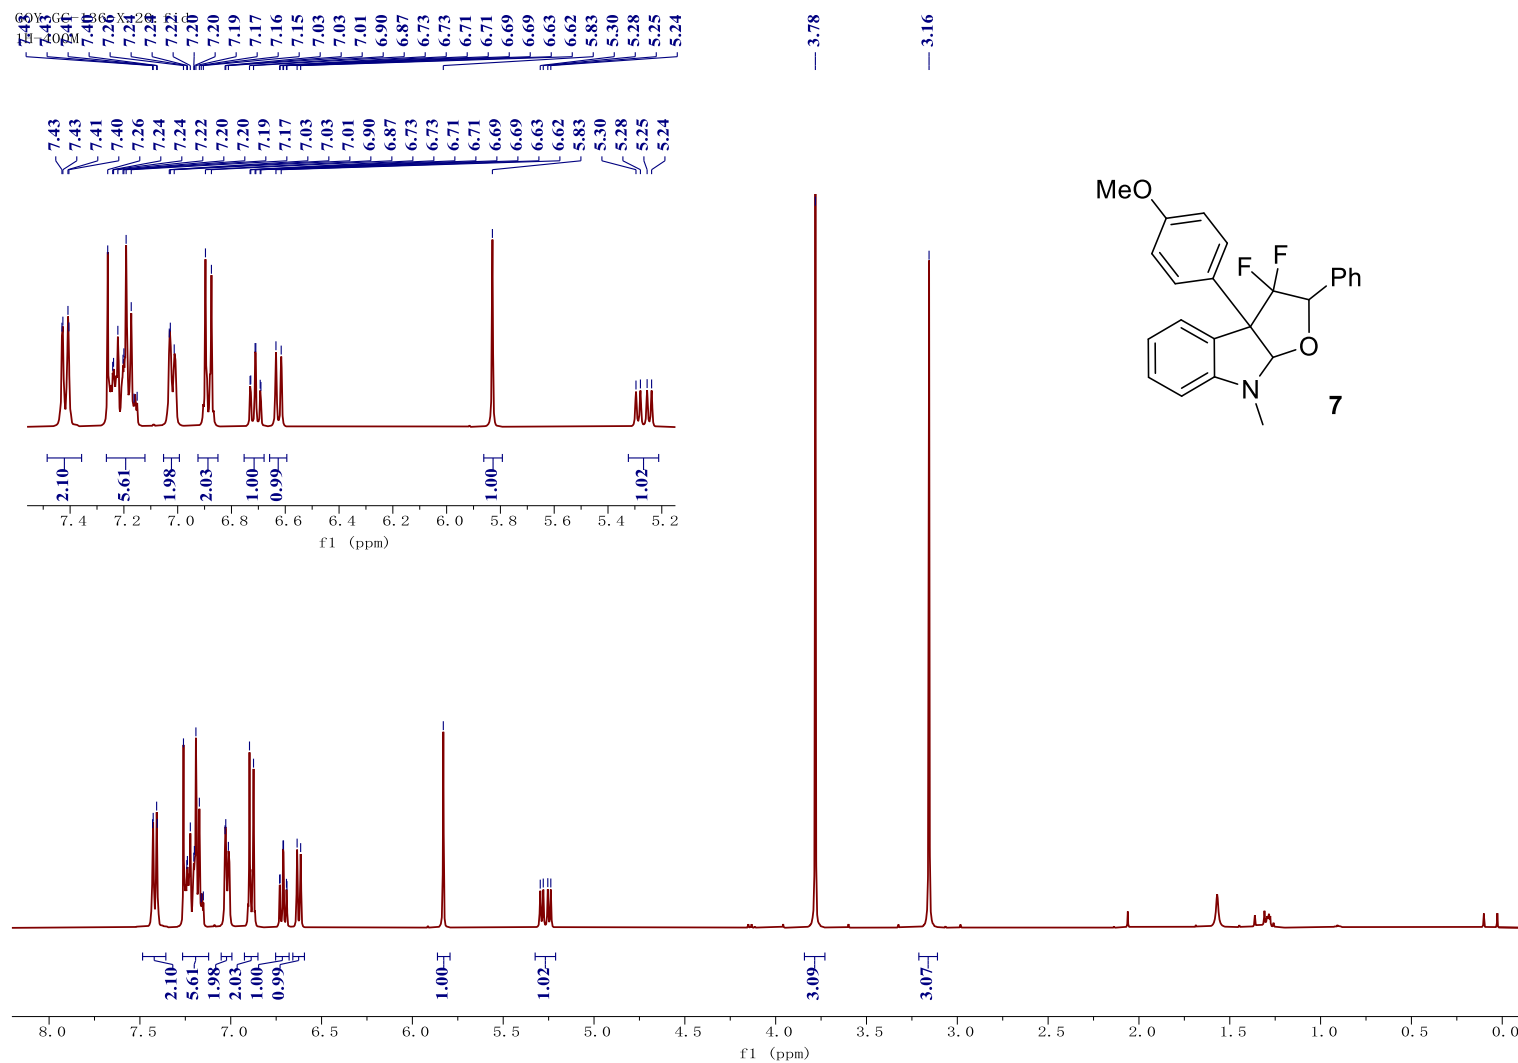

# **<sup>13</sup>C NMR of Compound 7 (125 MHz, CDCl<sub>3</sub>)**

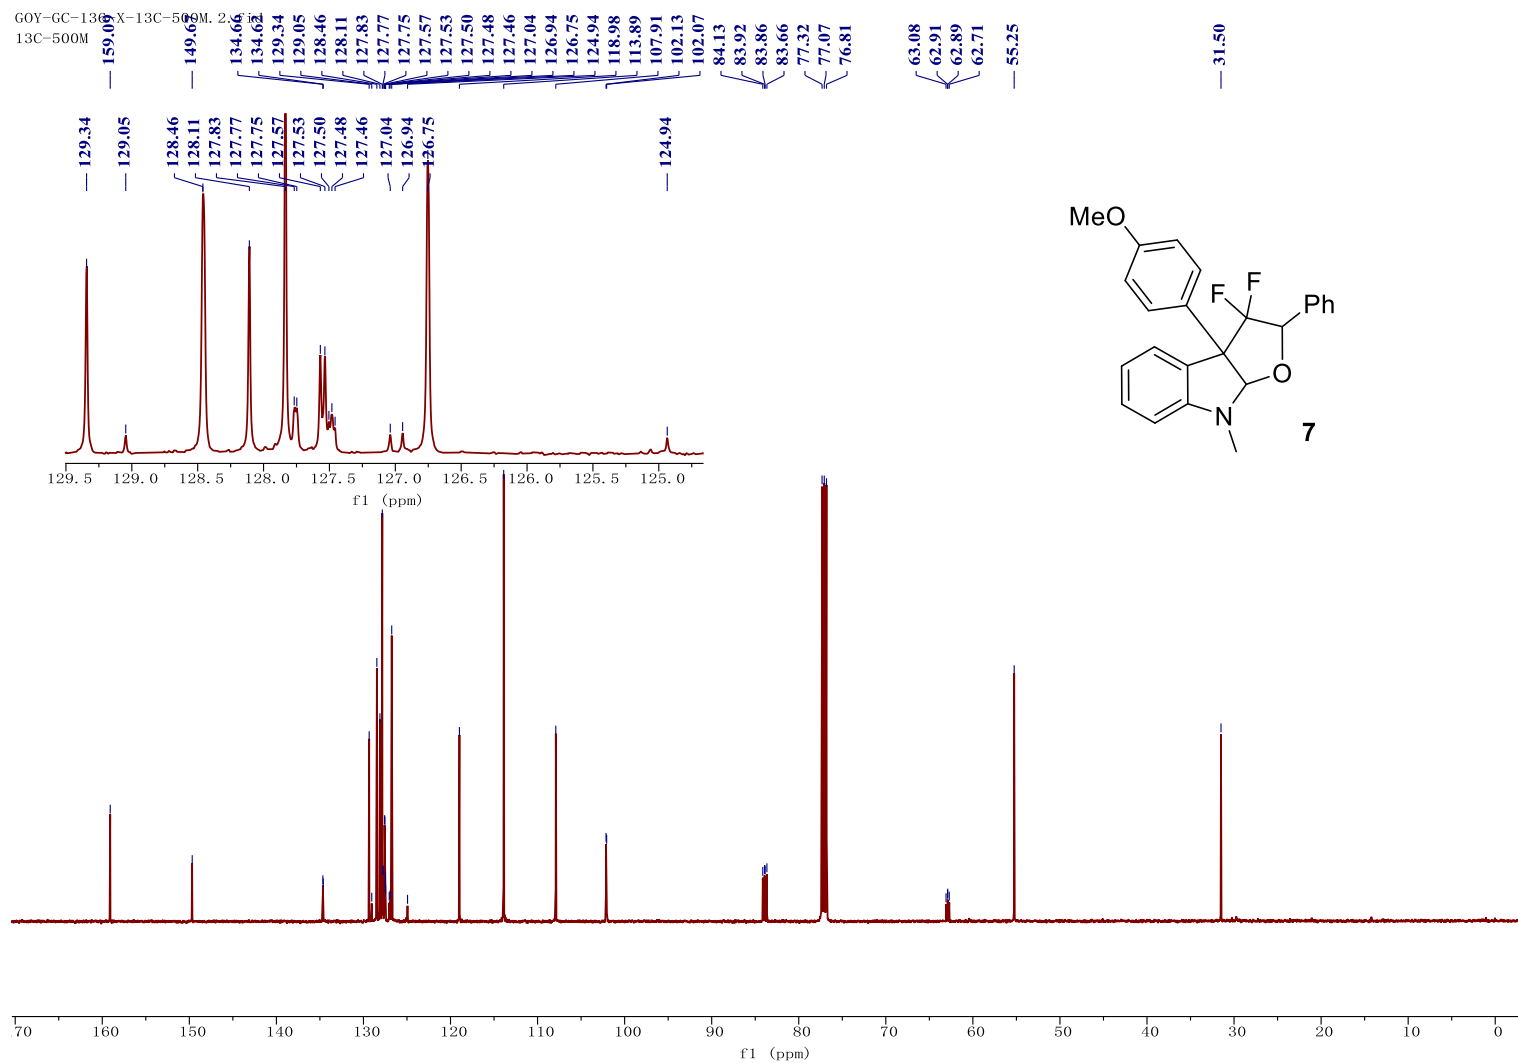

**$^{19}\text{F}$  NMR of Compound 7 (376 MHz,  $\text{CDCl}_3$ )**

GOY-GC-136-X. 21. fid  
19F-400M

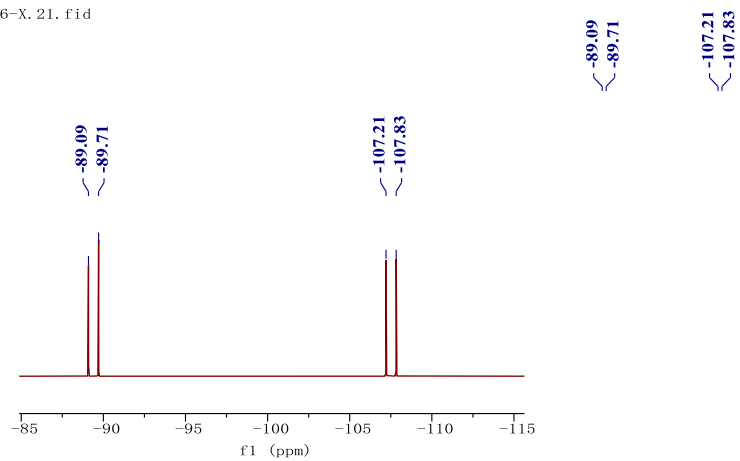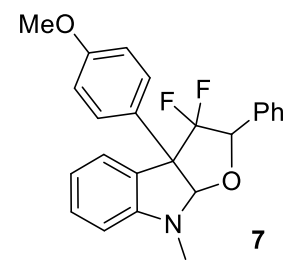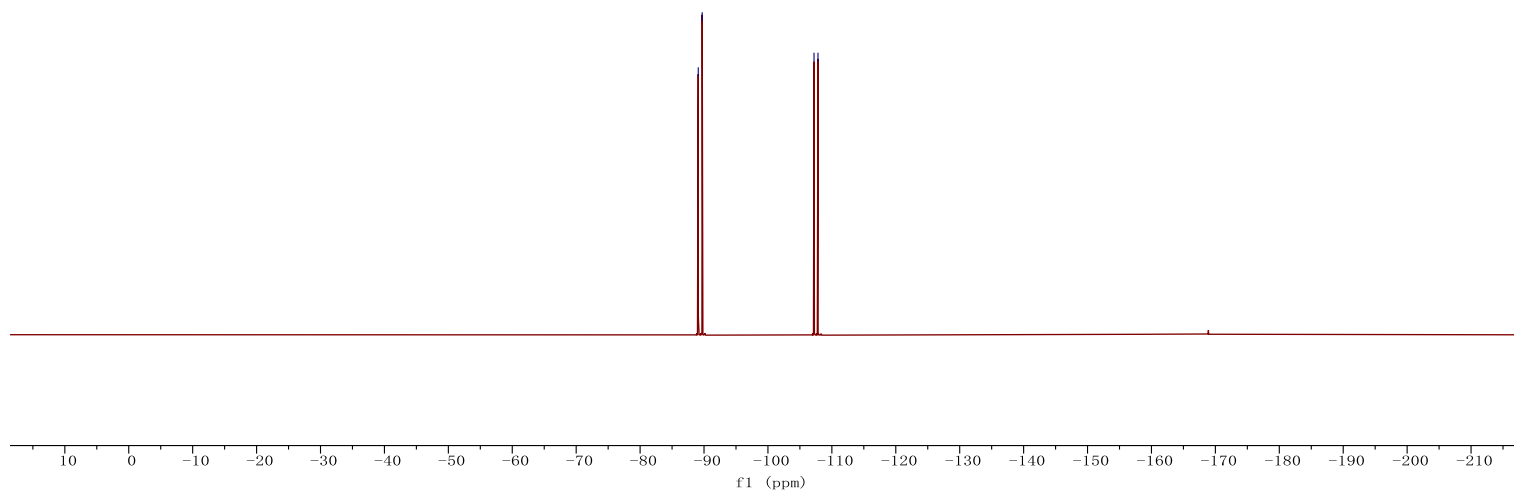

**<sup>1</sup>H NMR of Compound 8 (400 MHz, CDCl<sub>3</sub>)**

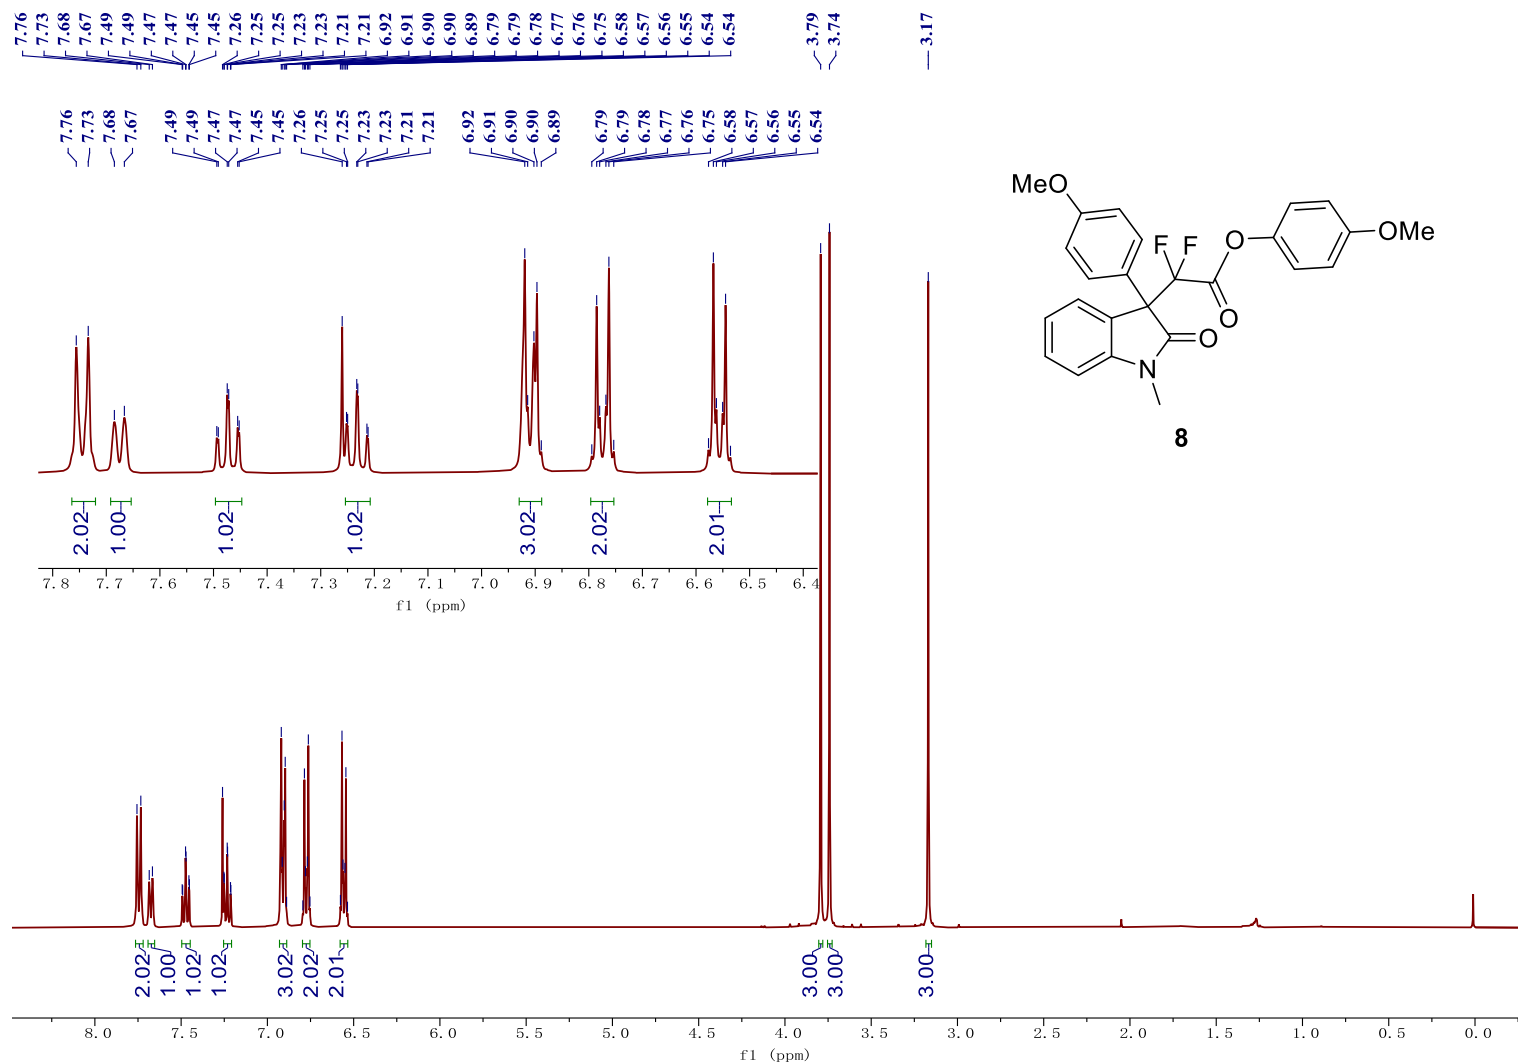

**$^{13}\text{C}$  NMR of Compound 8 (100 MHz,  $\text{CDCl}_3$ )**

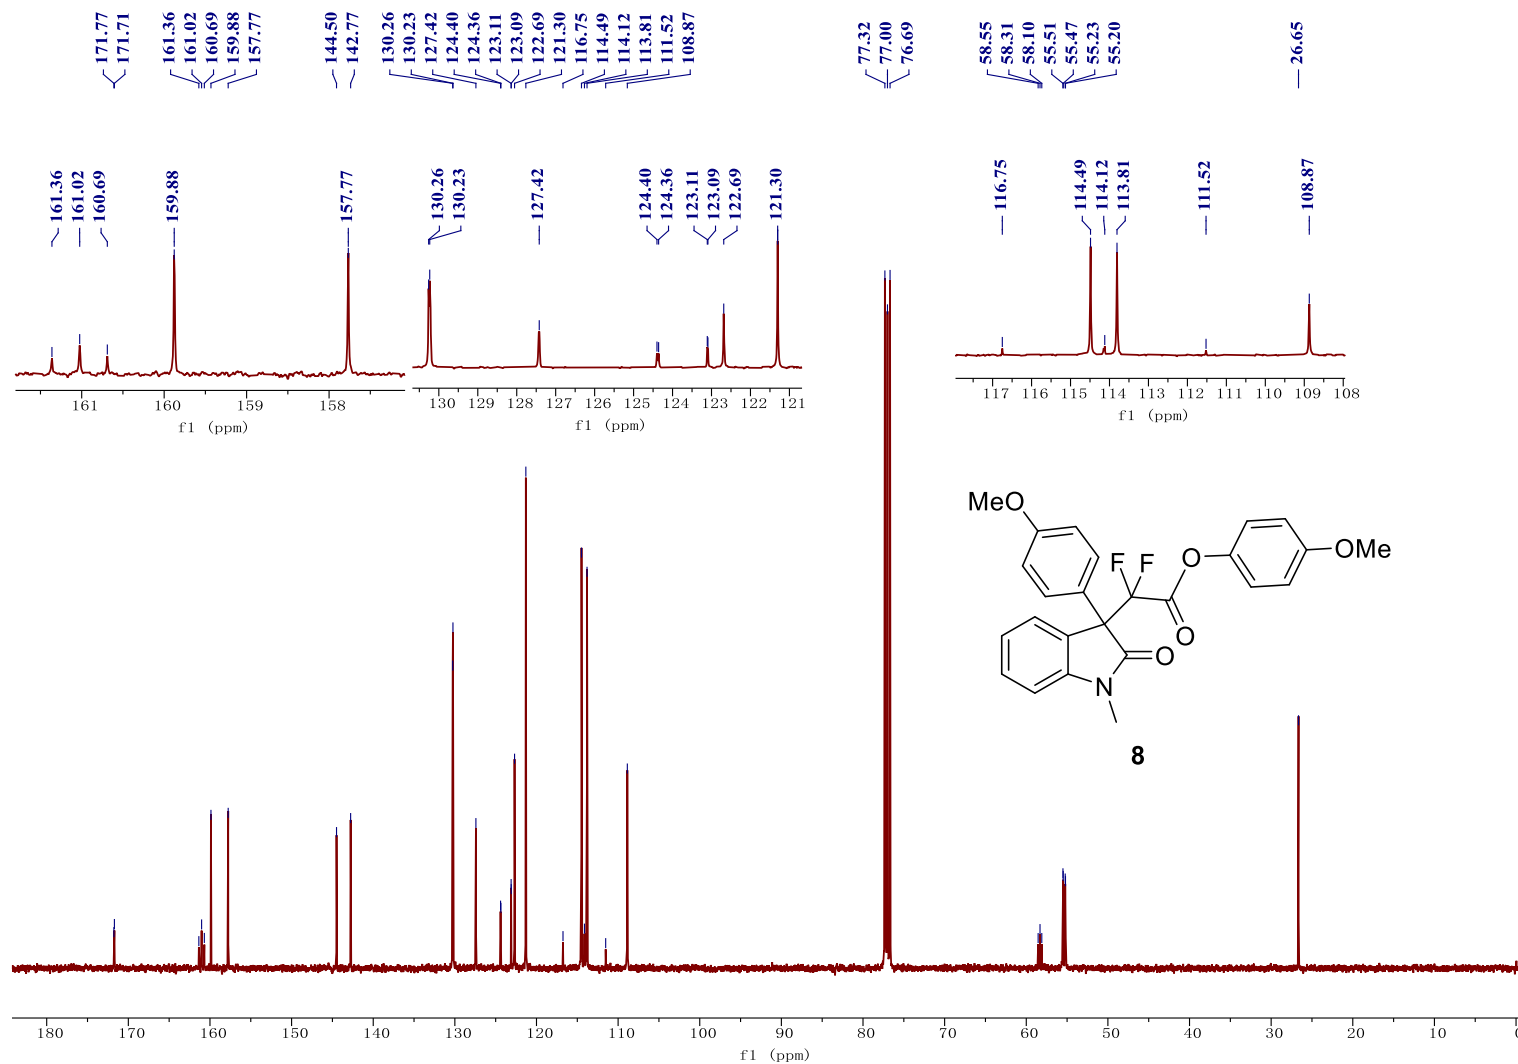

**$^{19}\text{F}$  NMR of Compound 8 (376 MHz,  $\text{CDCl}_3$ )**

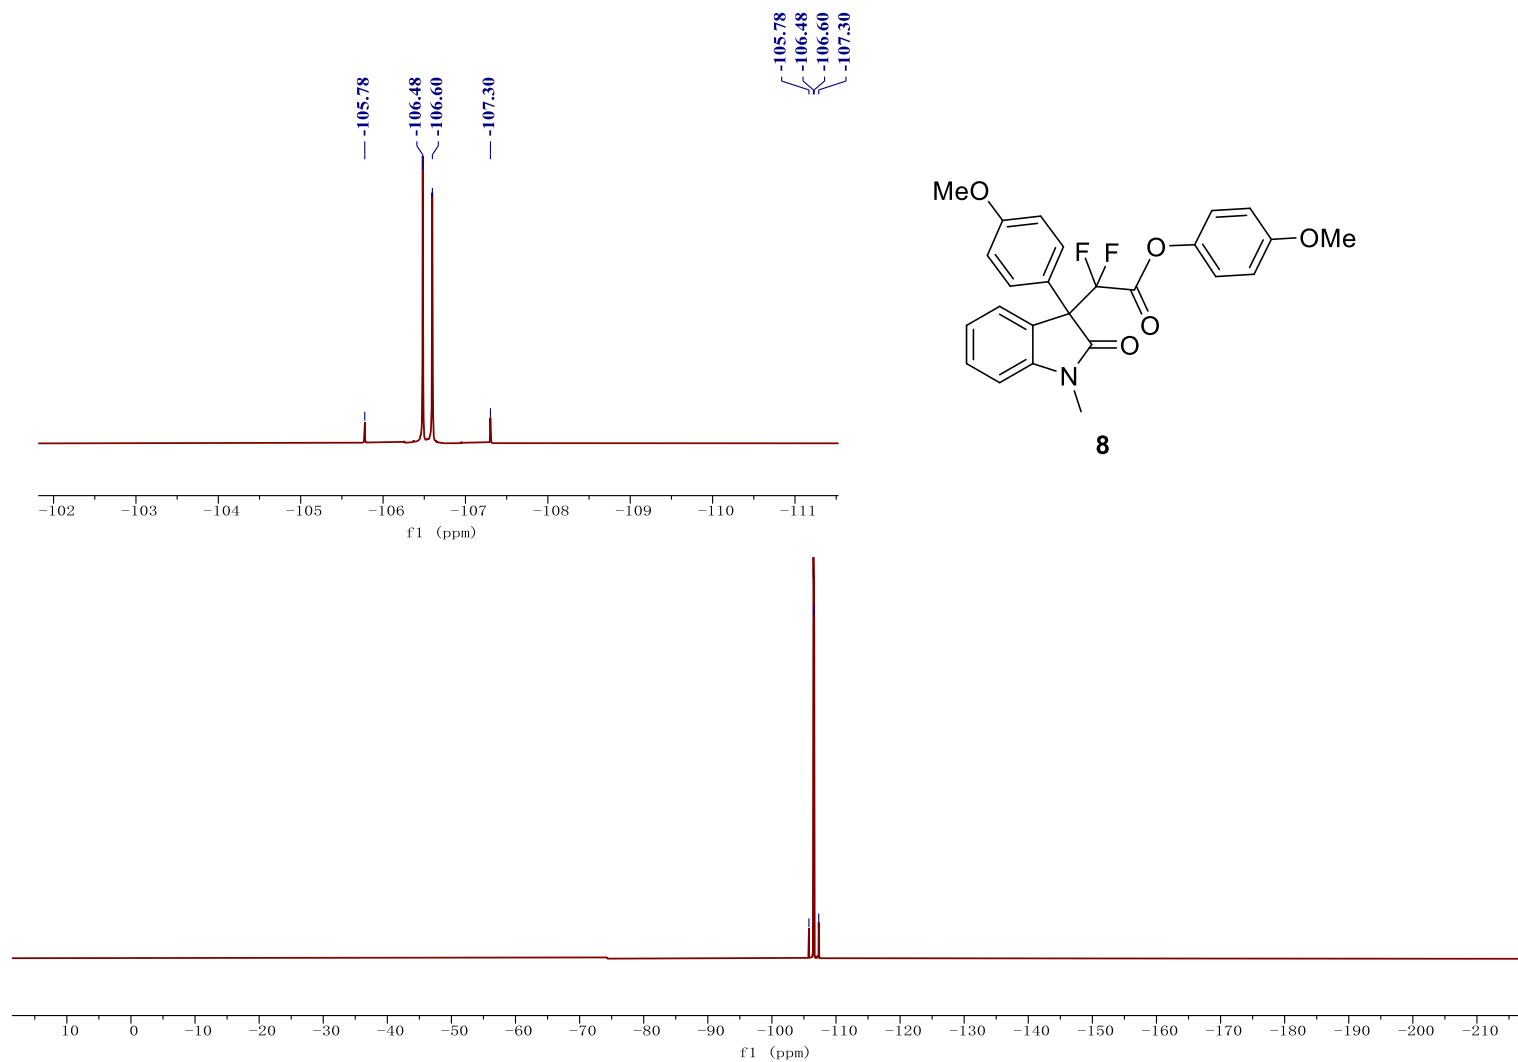

<sup>1</sup>H-400MHz  
 GOY-QC-400MHz  
 1H-400MHz

Chemical structure of compound **9**: CN(C)C(=O)C(F)(F)c1ccc(OC)cc1C2=CC=CC=C2N2C(=O)CC2

<sup>1</sup>H NMR spectrum (CDCl<sub>3</sub>) of compound **9**. The spectrum shows peaks in the aromatic region (6.6–8.5 ppm) and aliphatic region (2.6–3.8 ppm). Integration values are provided below the peaks.

| Chemical Shift (ppm) | Integration |
|----------------------|-------------|
| ~7.7                 | 2.00        |
| ~7.5                 | 1.00        |
| ~7.4                 | 1.01        |
| ~7.3                 | 1.00        |
| ~6.9                 | 3.00        |
| ~6.7                 | 0.93        |
| ~3.7                 | 3.06        |
| ~3.3                 | 2.94        |
| ~2.7                 | 2.94        |



**<sup>13</sup>C NMR of Compound 9 (100 MHz, CDCl<sub>3</sub>)**

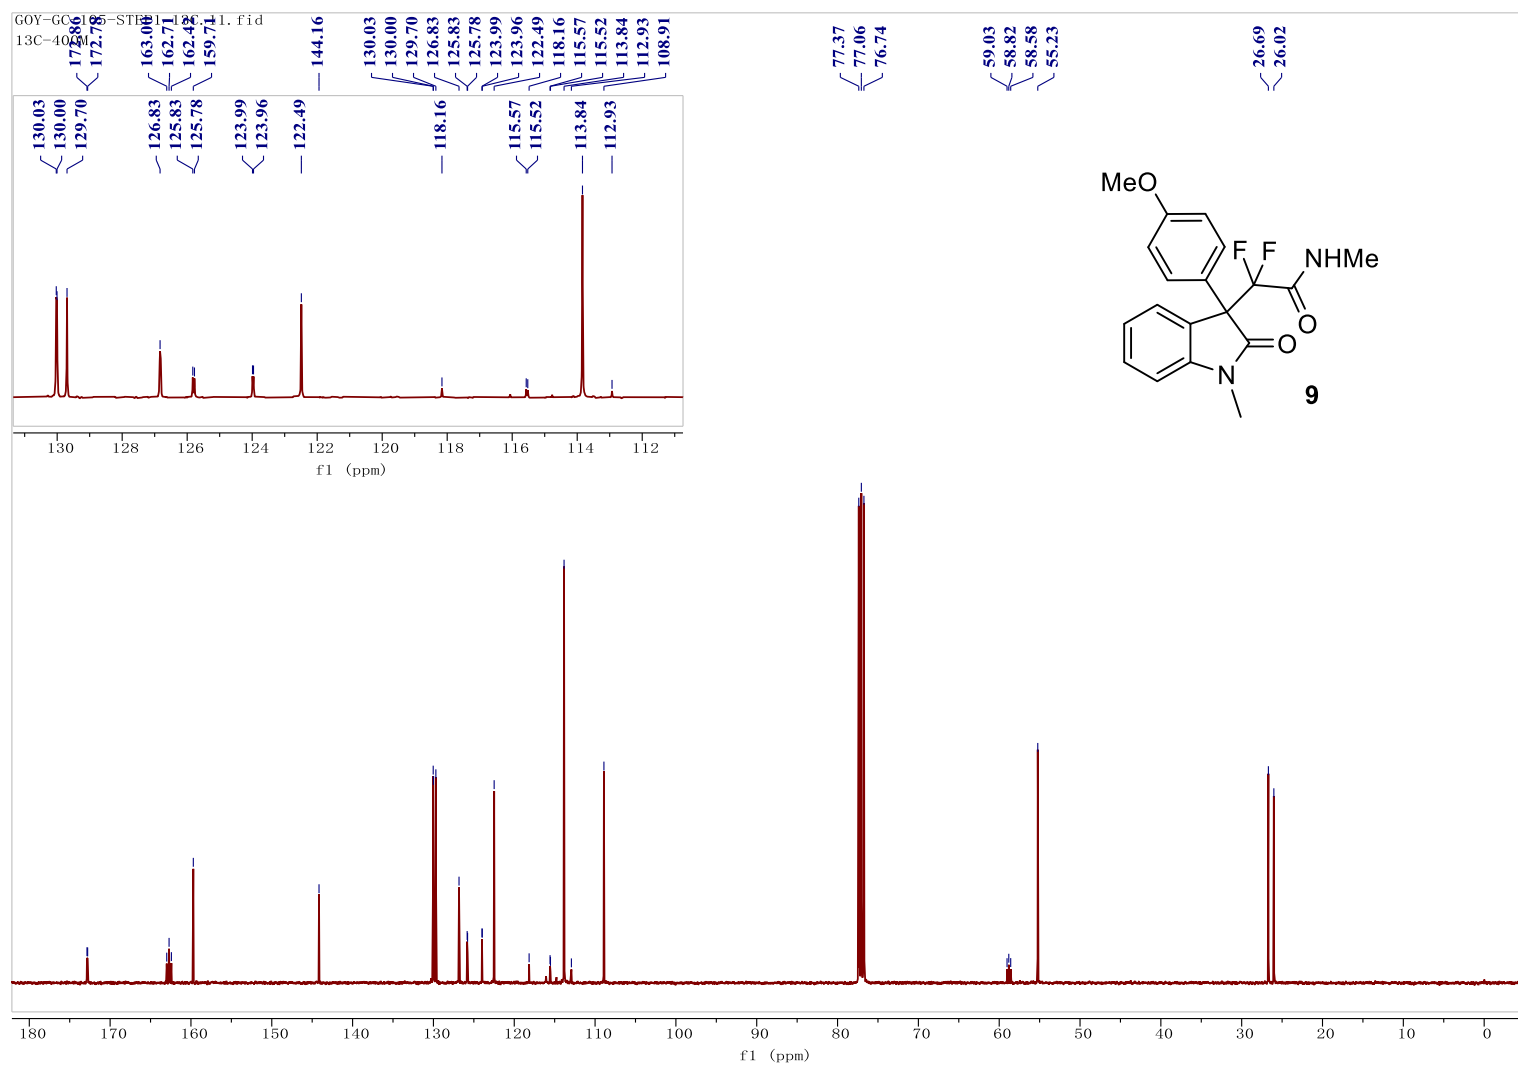

# <sup>19</sup>F NMR of Compound 9 (376 MHz, CDCl<sub>3</sub>)

GOY-GC-105-STEP1-19F, 12. fid  
19F-400M

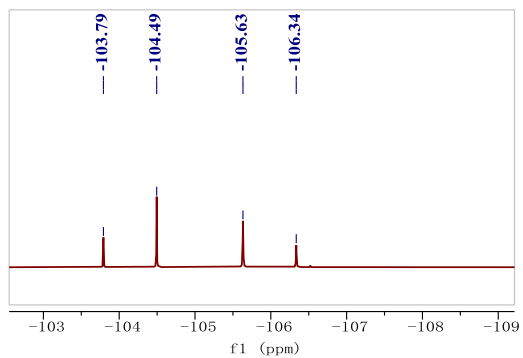

-103.79  
-104.49  
-105.63  
-106.34

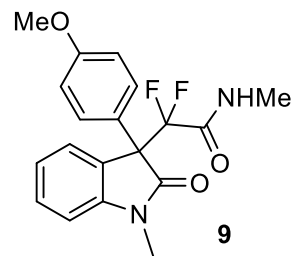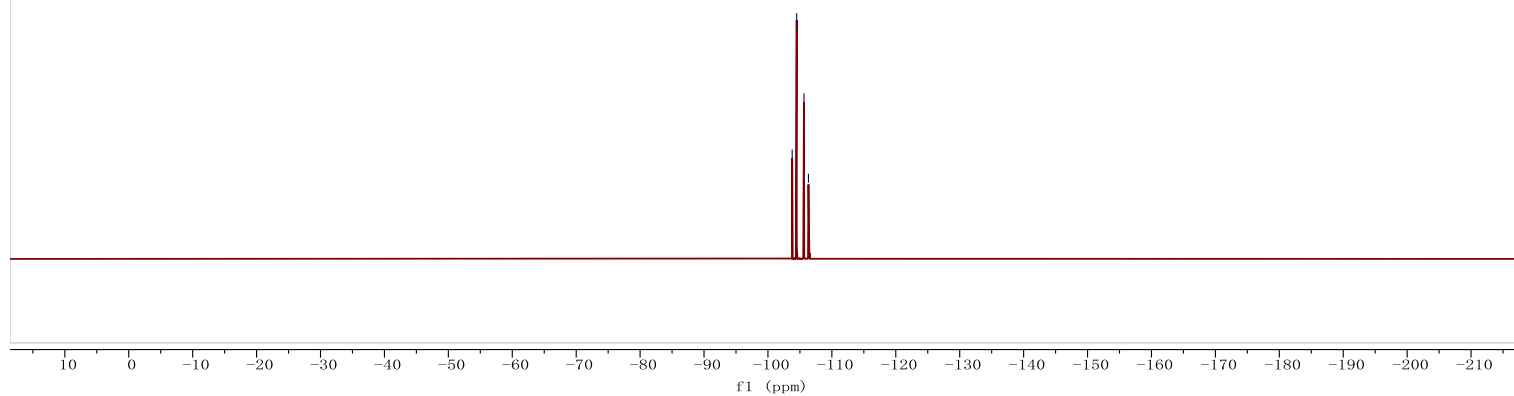

**<sup>1</sup>H NMR of Compound 10 (400 MHz, CDCl<sub>3</sub>)**

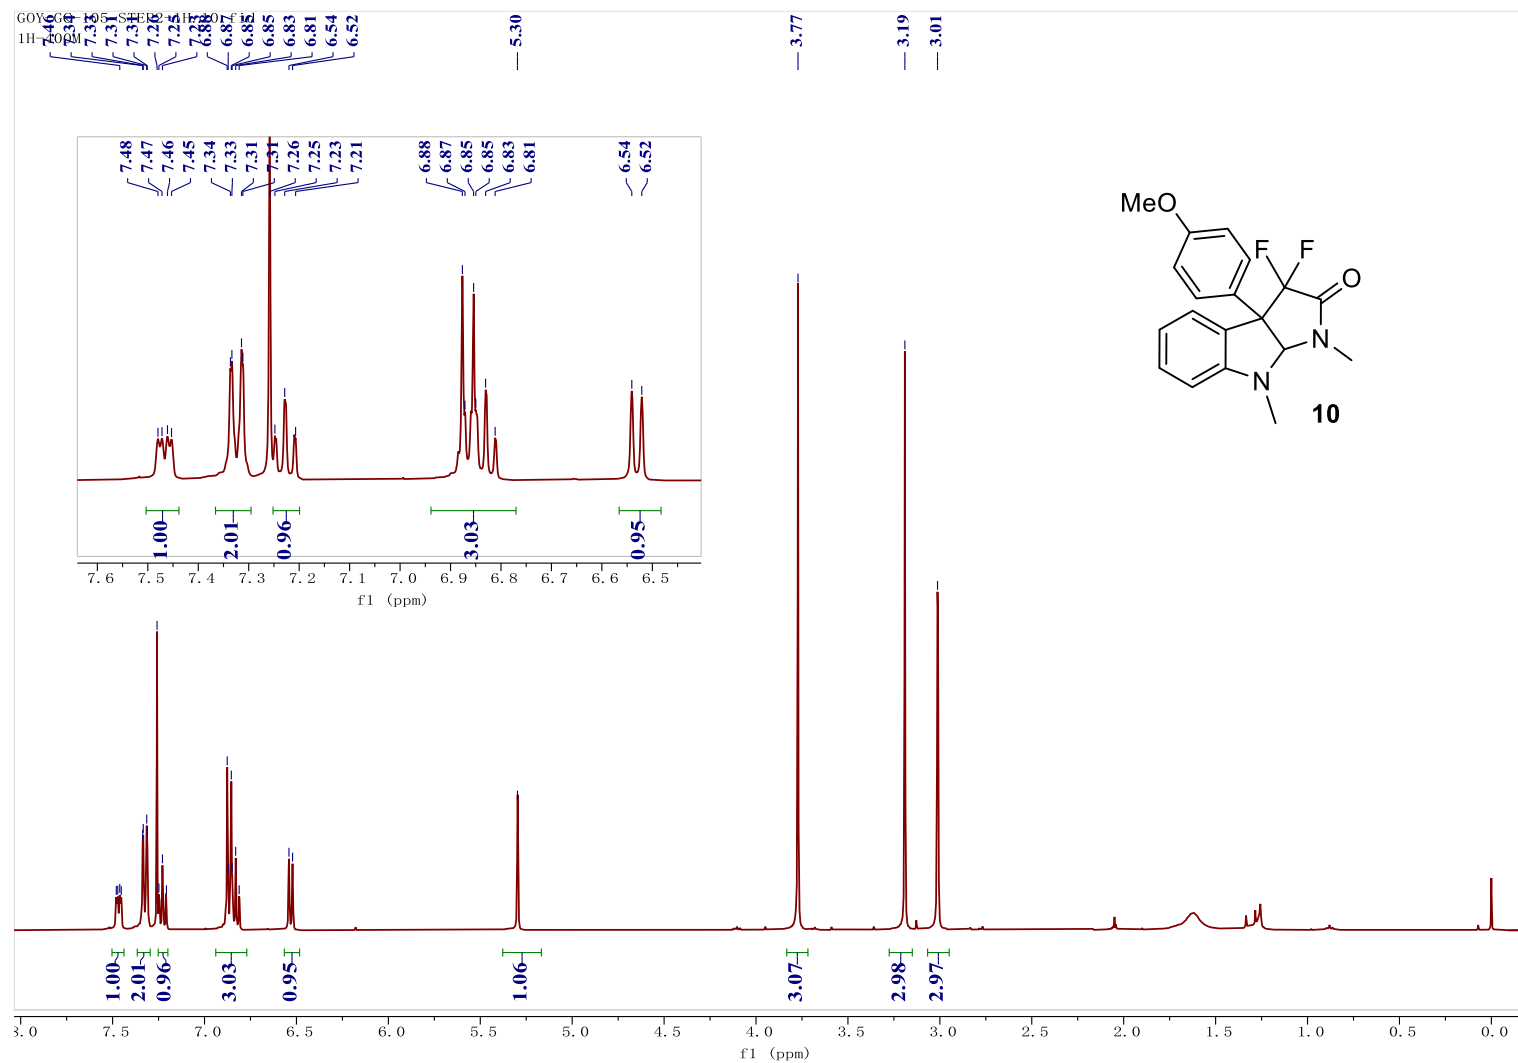

**$^{13}\text{C}$  NMR of Compound 10 (100 MHz,  $\text{CDCl}_3$ )**

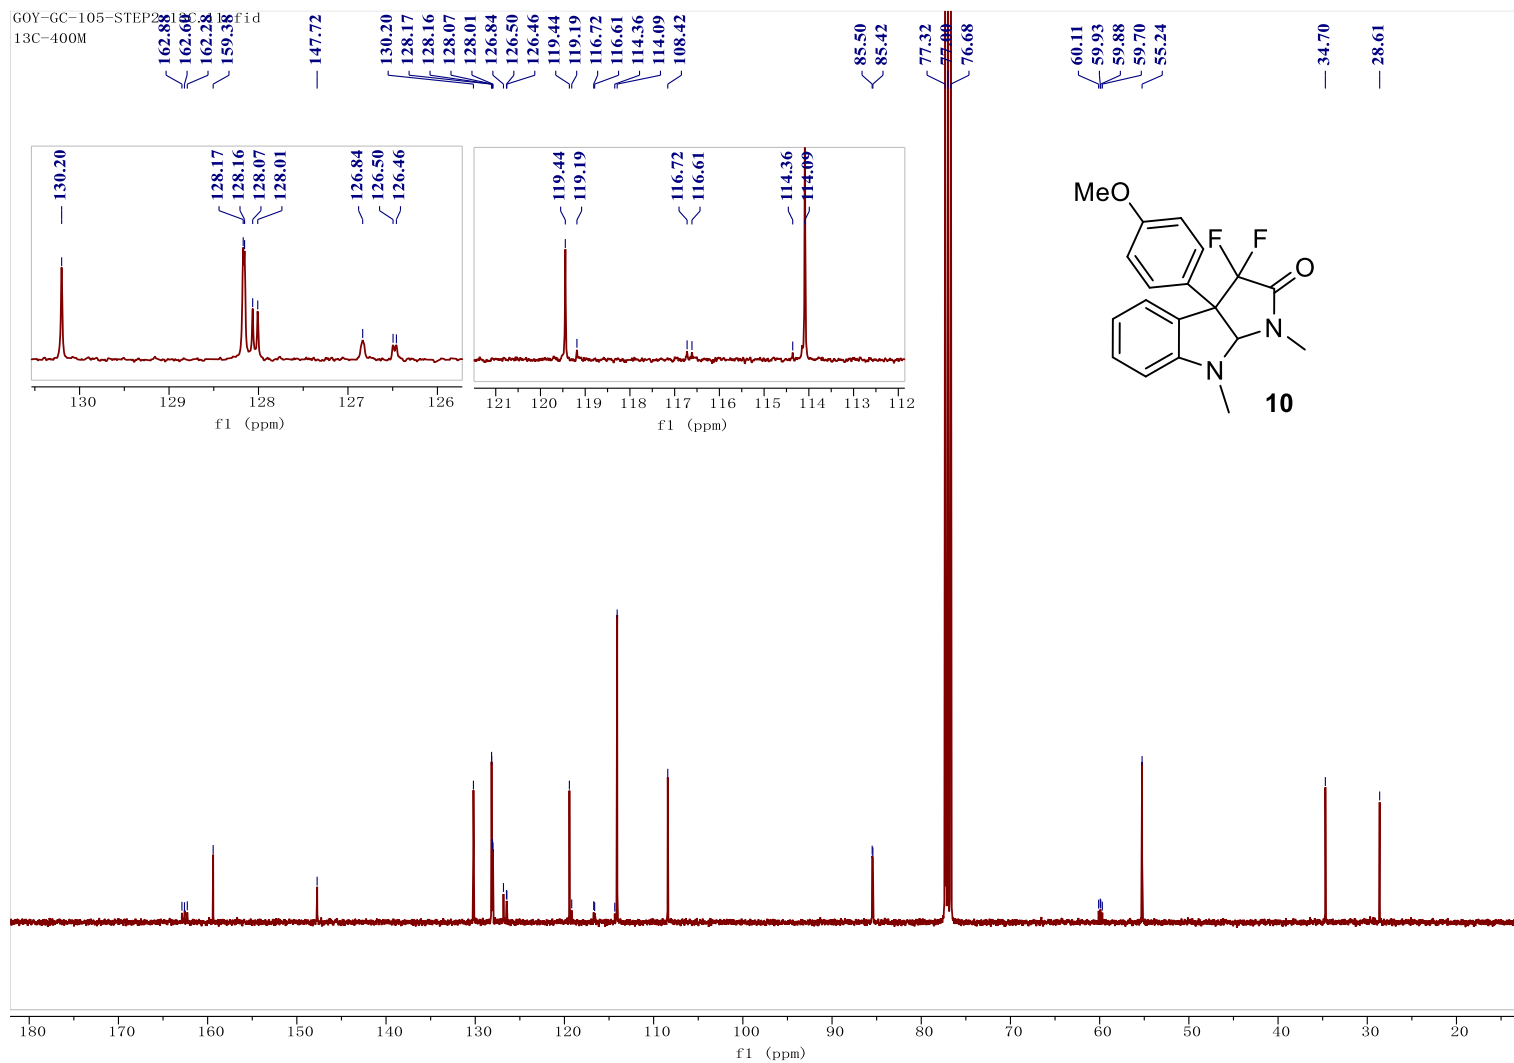

**$^{19}\text{F}$  NMR of Compound 10 (376 MHz,  $\text{CDCl}_3$ )**

GOY-GC-105-STEP2-19F, 12. fid  
19F-400M

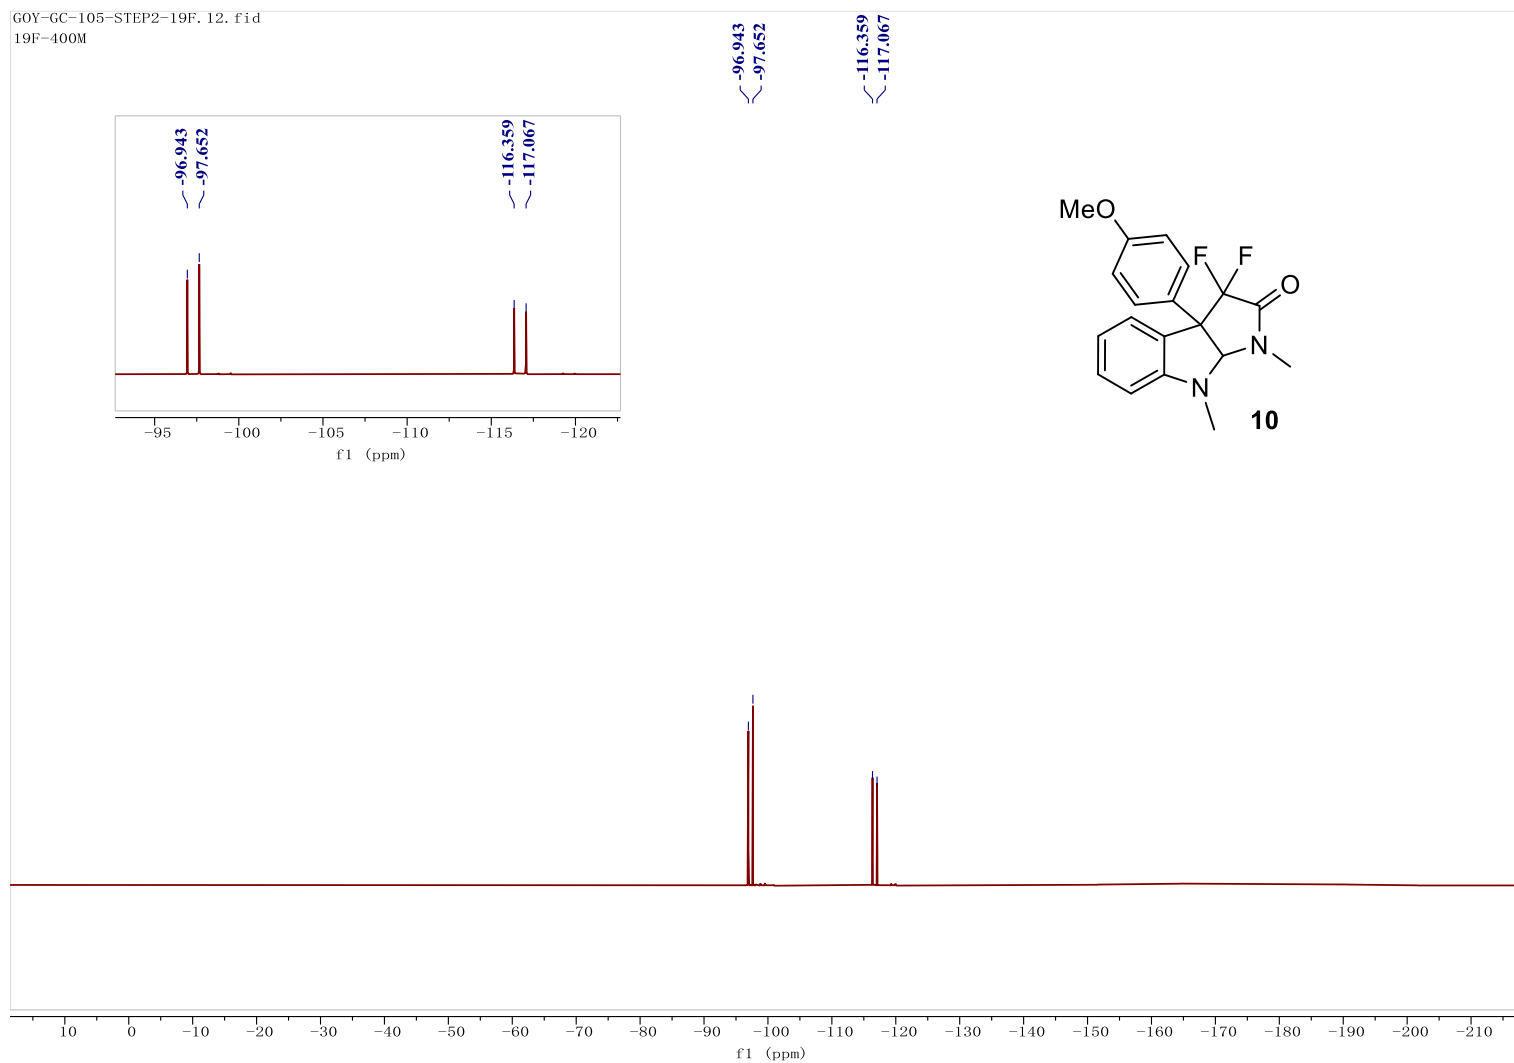

The HPLC spectra of *rac*-**3g** (synthesized from *rac*-**2g**)

#### <Sample Information>

|                  |                                      |              |                        |
|------------------|--------------------------------------|--------------|------------------------|
| Sample Name      | : GOY-GC-90-RAC-ASH-8020-1.0-230     | Sample Type  | : Unknown              |
| Sample ID        | :                                    |              |                        |
| Data Filename    | : GOY-GC-90-RAC-ASH-8020-1.0-231.lcd |              |                        |
| Method Filename  | : GY-1.0.lcm                         |              |                        |
| Batch Filename   | :                                    |              |                        |
| Vial #           | : 1-1                                |              |                        |
| Injection Volume | : 20 uL                              | Acquired by  | : System Administrator |
| Date Acquired    | : 6/6/2019 2:34:02 PM                | Processed by | : System Administrator |
| Date Processed   | : 9/29/2020 9:21:33 AM               |              |                        |

#### <Chromatogram>

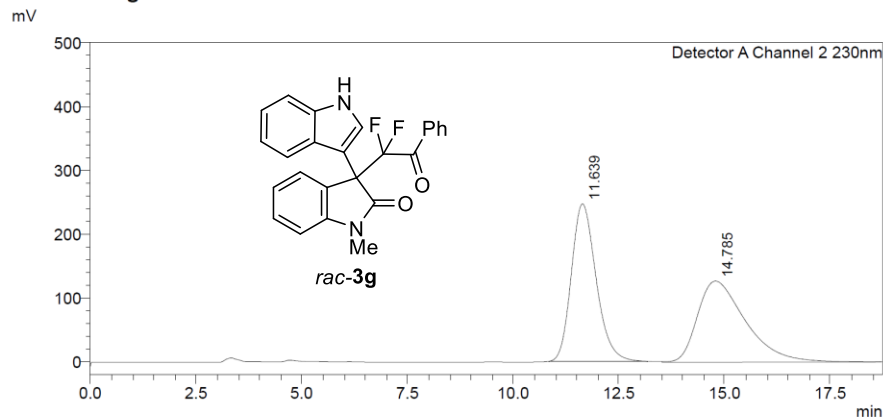

#### <Peak Table>

Detector A Channel 2 230nm

| Peak# | Ret. Time | Area     | Height | Conc.  |
|-------|-----------|----------|--------|--------|
| 1     | 11.639    | 10074719 | 246846 | 49.984 |
| 2     | 14.785    | 10081332 | 127147 | 50.016 |
| Total |           | 20156051 | 373994 |        |

The HPLC spectra of **3g** (synthesized from (*R*)-**2g** (72% ee))

#### <Sample Information>

|                  |                                             |              |                        |
|------------------|---------------------------------------------|--------------|------------------------|
| Sample Name      | : GOY-GC-90-workup-ASY-ASH-8020-1.0-230     | Sample Type  | : Unknown              |
| Sample ID        | :                                           |              |                        |
| Data Filename    | : GOY-GC-90-workup-ASY-ASH-8020-1.0-230.lcd |              |                        |
| Method Filename  | : GY-1.0.lcm                                |              |                        |
| Batch Filename   | :                                           |              |                        |
| Vial #           | : 1-1                                       |              |                        |
| Injection Volume | : 20 uL                                     | Acquired by  | : System Administrator |
| Date Acquired    | : 6/6/2019 9:09:42 PM                       | Processed by | : System Administrator |
| Date Processed   | : 9/29/2020 9:24:51 AM                      |              |                        |

#### <Chromatogram>

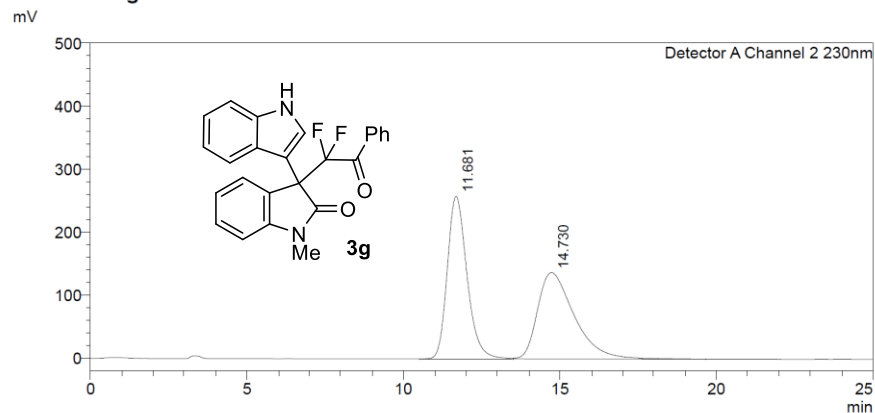

#### <Peak Table>

Detector A Channel 2 230nm

| Peak# | Ret. Time | Area     | Height | Conc.  |
|-------|-----------|----------|--------|--------|
| 1     | 11.681    | 11291092 | 258311 | 50.272 |
| 2     | 14.730    | 11169028 | 137259 | 49.728 |
| Total |           | 22460119 | 395570 |        |
